# Supplementary material for: Chiral phosphoric acid catalyzed atroposelective C–H amination of arenes: mechanisms, origin and influencing factors of enantioselectivity
Source: Royal Society of Chemistry journal article supplement (doi:10.1039/d0qo01160f), 2020-11-03
Supplement: d0qo01160f1.pdf [file d0qo01160f1.pdf]

## Supporting information

### **Chiral Phosphoric Acid Catalyzed Atroposelective C-H Amination of Arenes: Mechanisms, Origin and Influencing Factors of Enantioselectivity**

*Ka Lu,<sup>a</sup> Peng-Yu Liang,<sup>a</sup> Chao-Xian Yan,<sup>a</sup> Fang-Ling Yang,<sup>a</sup> Xing Yang,<sup>a</sup> Wei Dou,<sup>a</sup> Qinwei*

*Yu,<sup>b</sup> Jianming Yang<sup>b</sup> and Pan-Pan Zhou<sup>\*a</sup>*

*<sup>a</sup>State Key Laboratory of Applied Organic Chemistry, Key Laboratory of Special Function Materials and Structure Design of Ministry of Education, Advanced Catalysis Center, College of Chemistry and Chemical Engineering, Lanzhou University, 222 South Tianshui Road, 730000, Lanzhou, P. R. China.*

*Fax: +86-931-8912582, Tel: +86 931 8912862, \*E-mail: zhoupp@lzu.edu.cn*

*<sup>b</sup>State Key Laboratory of Fluorine & Nitrogen Chemicals, Xi'an Modern Chemistry Research Institute, Xi'an, 710065, P. R. China.*

## 1. Study on the stability of the dimeric and trimeric complexes in paths I-IV.

**Table S1** The relative Gibbs free energies ( $\Delta G$ , in kcal/mol) and intermolecular interaction energies ( $\Delta E$ , in kcal/mol) for the dimeric and trimeric complexes formed in the amination reaction.

| Complex                  | $\Delta G^a$ | $\Delta E/(\text{kcal/mol})^b$ |
|--------------------------|--------------|--------------------------------|
| <b>DI</b>                | 4.2          | -15.3                          |
| <b>DI<sub>R2</sub></b>   | 5.8          | -9.5                           |
| <b>COMI</b>              | 6.3          | -30.2                          |
| <b>DII</b>               | 4.2          | -15.3                          |
| <b>DII<sub>R2</sub></b>  | 5.7          | -10.2                          |
| <b>COMII</b>             | 9.0          | -28.9                          |
| <b>DIII</b>              | 3.0          | -13.3                          |
| <b>DIII<sub>R2</sub></b> | 13.8         | -2.1                           |
| <b>COMIII</b>            | 23.6         | -13.8                          |
| <b>DIV</b>               | 4.1          | -13.5                          |
| <b>DIV<sub>R2</sub></b>  | 6.4          | -10.5                          |
| <b>COMIV</b>             | 16.4         | -18.2                          |

<sup>a</sup> The  $\Delta G$  is calculated as the difference between the Gibbs free energy of the dimeric (or trimeric) complex and the sum of the Gibbs free energy of [(S)-C6 + R1 (or R2)] (or [(S)-C6 + R1 + R2]).

<sup>b</sup> The  $\Delta E$  is calculated as the difference between the total energy of the dimeric (or trimeric) complex and the sum of the total energy of [(S)-C6 + R1 (or R2)] (or [(S)-C6 + R1 + R2]).

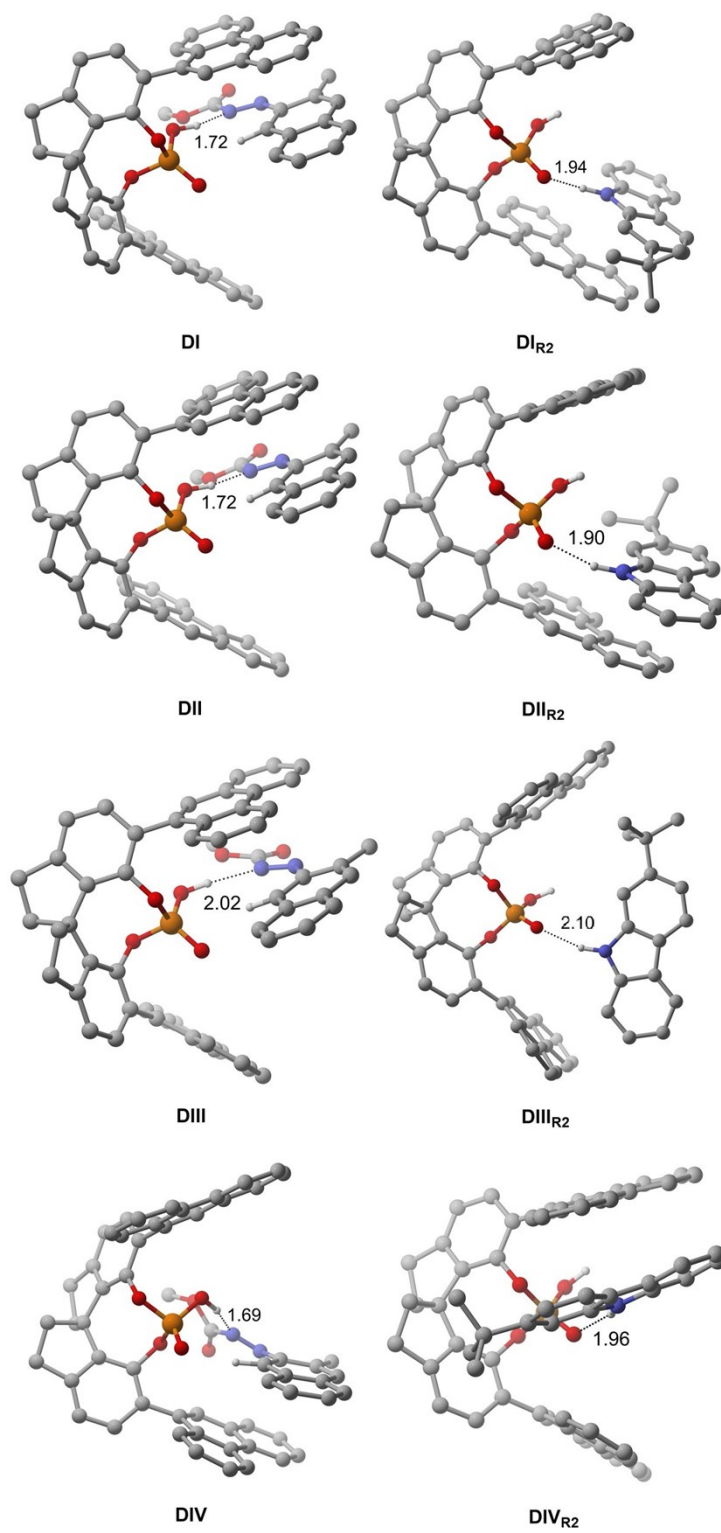

**Fig. S1** The optimized geometries of the dimeric complexes in paths I-IV. The distances are in Å.

## 2. QTAIM Analyses

QTAIM analyses were carried out on the optimized complexes, transition states and intermediates of path **I** and path **II** to figure out the intermolecular interactions.

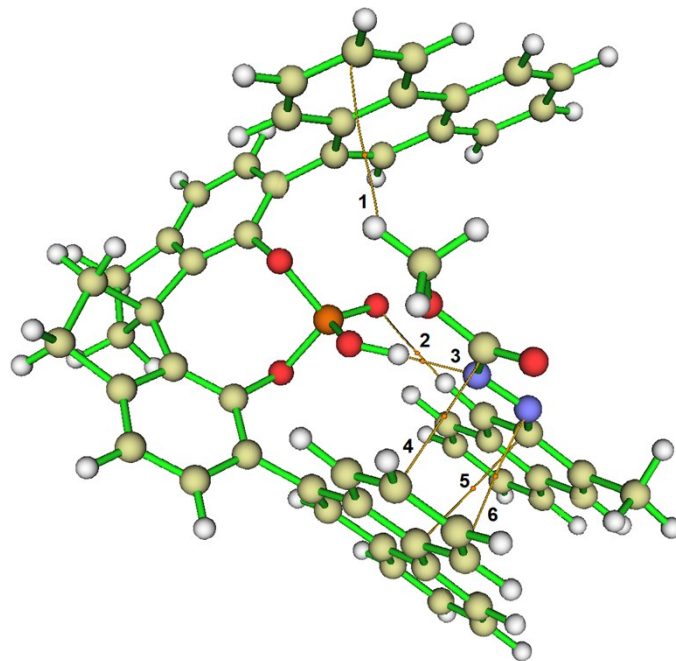

**Fig. S2** Intermolecular interactions in **DI** and numbers of bond critical points (BCPs No.).

**Table S2** Numbers of bond critical points (BCPs No.) and the corresponding distances between atoms ( $d$ , in Å), classifications of the intermolecular interactions, electron density ( $\rho$ , in a.u.) and its Laplacian value ( $\nabla^2\rho$ , in a.u.), the electronic kinetic energy density ( $G$ , in a.u.), the electronic potential energy density ( $V$ , in a.u.) and the electronic energy density ( $H$ , in a.u.) at the BCPs of **DI**.

|           | BCPs No. | Classification  | $d$  | $\rho$ | $\nabla^2\rho$ | $G$     | $V$    | $H$     |
|-----------|----------|-----------------|------|--------|----------------|---------|--------|---------|
| <b>DI</b> | 1        | C-H... $\pi$    | 3.81 | 0.0008 | 0.0031         | -0.0003 | 0.0005 | 0.0002  |
|           | 2        | C-H...O         | 2.34 | 0.0135 | 0.0402         | -0.0099 | 0.0100 | 0.0001  |
|           | 3        | O-H...N         | 1.72 | 0.0493 | 0.1049         | -0.0358 | 0.0310 | -0.0048 |
|           | 4        | $\pi$ ... $\pi$ | 3.07 | 0.0082 | 0.0285         | -0.0043 | 0.0057 | 0.0014  |
|           | 5        | $\pi$ ... $\pi$ | 3.35 | 0.0064 | 0.0194         | -0.0032 | 0.0040 | 0.0008  |
|           | 6        | $\pi$ ... $\pi$ | 3.21 | 0.0072 | 0.0215         | -0.0038 | 0.0046 | 0.0008  |

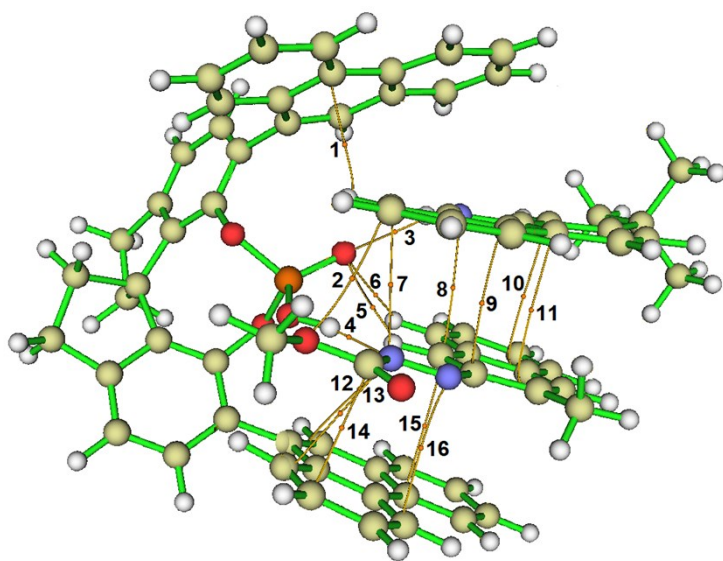

**Fig. S3** Intermolecular interactions in **COMI** and numbers of bond critical points (BCPs No.).

**Table S3** Numbers of bond critical points (BCPs No.) and the corresponding distances between atoms ( $d$ , in Å), classifications of the intermolecular interactions, electron density ( $\rho$ , in a.u.) and its Laplacian value ( $\nabla^2\rho$ , in a.u.), the electronic kinetic energy density ( $G$ , in a.u.), the electronic potential energy density ( $V$ , in a.u.) and the electronic energy density ( $H$ , in a.u.) at the BCPs of **COMI**.

|             | BCPs No. | Classification  | $d$  | $\rho$ | $\nabla^2\rho$ | $G$     | $V$    | $H$     |
|-------------|----------|-----------------|------|--------|----------------|---------|--------|---------|
| <b>COMI</b> | 1        | C-H... $\pi$    | 2.72 | 0.0083 | 0.0282         | -0.0042 | 0.0056 | 0.0014  |
|             | 2        | lp... $\pi$     | 3.06 | 0.0091 | 0.0316         | -0.0059 | 0.0069 | 0.0010  |
|             | 3        | N-H...O         | 2.07 | 0.0186 | 0.0634         | -0.0156 | 0.0157 | 0.0001  |
|             | 4        | O-H...N         | 1.73 | 0.0476 | 0.1000         | -0.0336 | 0.0293 | -0.0043 |
|             | 5        | C-H... $\pi$    | 2.43 | 0.0123 | 0.0417         | -0.0088 | 0.0096 | 0.0008  |
|             | 6        | C-H...O         | 2.49 | 0.0098 | 0.0335         | -0.0069 | 0.0076 | 0.0007  |
|             | 7        | $\pi$ ... $\pi$ | 3.09 | 0.0099 | 0.0289         | -0.0056 | 0.0064 | 0.0008  |
|             | 8        | lp... $\pi$     | 3.12 | 0.0090 | 0.0260         | -0.0053 | 0.0059 | 0.0006  |
|             | 9        | $\pi$ ... $\pi$ | 3.35 | 0.0068 | 0.0206         | -0.0036 | 0.0044 | 0.0008  |
|             | 10       | $\pi$ ... $\pi$ | 3.43 | 0.0060 | 0.0166         | -0.0028 | 0.0035 | 0.0007  |
|             | 11       | $\pi$ ... $\pi$ | 3.39 | 0.0064 | 0.0182         | -0.0031 | 0.0038 | 0.0007  |
|             | 12       | C-H... $\pi$    | 3.26 | 0.0038 | 0.0119         | -0.0018 | 0.0024 | 0.0006  |
|             | 13       | $\pi$ ... $\pi$ | 3.19 | 0.0082 | 0.0247         | -0.0047 | 0.0054 | 0.0007  |
|             | 14       | $\pi$ ... $\pi$ | 2.96 | 0.0100 | 0.0361         | -0.0056 | 0.0073 | 0.0017  |
|             | 15       | $\pi$ ... $\pi$ | 3.27 | 0.0073 | 0.0212         | -0.0035 | 0.0044 | 0.0009  |
|             | 16       | $\pi$ ... $\pi$ | 3.26 | 0.0068 | 0.0201         | -0.0036 | 0.0043 | 0.0007  |

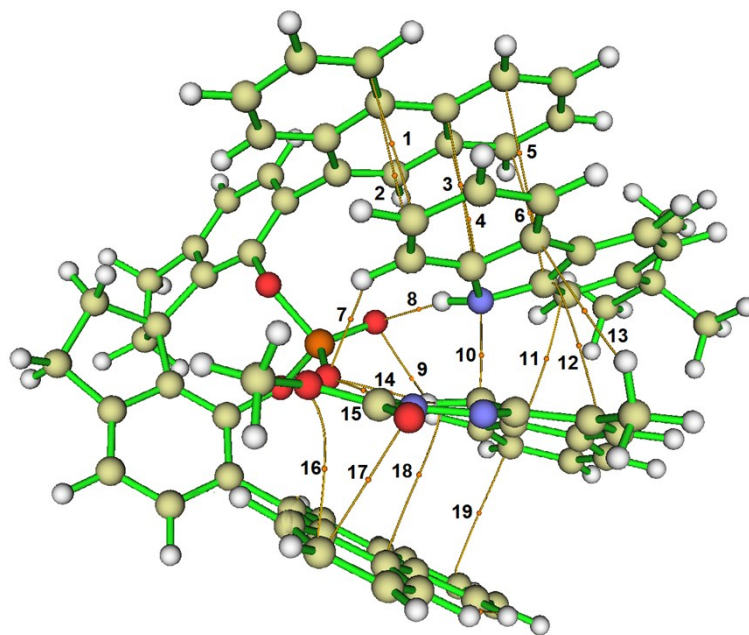

**Fig. S4** Intermolecular interactions in **TSI-1** and numbers of bond critical points (BCPs No.).



**Table S4** Numbers of bond critical points (BCPs No.) and the corresponding distances between atoms ( $d$ , in Å), classifications of the intermolecular interactions, electron density ( $\rho$ , in a.u.) and its Laplacian value ( $\nabla^2\rho$ , in a.u.), the electronic kinetic energy density ( $G$ , in a.u.), the electronic potential energy density ( $V$ , in a.u.) and the electronic energy density ( $H$ , in a.u.) at the BCPs of **TSI-1**.

|              | BCPs No. | Classification | $d$  | $\rho$ | $\nabla^2\rho$ | $G$     | $V$    | $H$     |
|--------------|----------|----------------|------|--------|----------------|---------|--------|---------|
| <b>TSI-1</b> | 1        | $\pi\dots\pi$  | 3.35 | 0.0065 | 0.0183         | -0.0031 | 0.0038 | 0.0007  |
|              | 2        | $\pi\dots\pi$  | 3.36 | 0.0064 | 0.0185         | -0.0031 | 0.0039 | 0.0008  |
|              | 3        | $\pi\dots\pi$  | 3.45 | 0.0057 | 0.0159         | -0.0027 | 0.0033 | 0.0006  |
|              | 4        | $lp\dots\pi$   | 3.57 | 0.0041 | 0.0137         | -0.0025 | 0.0029 | 0.0004  |
|              | 5        | $\pi\dots\pi$  | 3.44 | 0.0059 | 0.0165         | -0.0028 | 0.0035 | 0.0007  |
|              | 6        | $\pi\dots\pi$  | 3.37 | 0.0066 | 0.0182         | -0.0031 | 0.0038 | 0.0007  |
|              | 7        | C-H...O        | 2.28 | 0.0158 | 0.0493         | -0.0122 | 0.0123 | 0.0001  |
|              | 8        | N-H...O        | 1.73 | 0.0416 | 0.1255         | -0.0331 | 0.0322 | -0.0009 |
|              | 9        | C-H...O        | 2.48 | 0.0104 | 0.0347         | -0.0073 | 0.0080 | 0.0007  |
|              | 10       | C...N          | 2.08 | 0.0687 | 0.0794         | -0.0483 | 0.0341 | -0.0142 |
|              | 11       | $\pi\dots\pi$  | 3.07 | 0.0108 | 0.0358         | -0.0059 | 0.0074 | 0.0015  |
|              | 12       | $\pi\dots\pi$  | 3.48 | 0.0061 | 0.0174         | -0.0030 | 0.0037 | 0.0007  |
|              | 13       | C-H... $\pi$   | 3.24 | 0.0030 | 0.0097         | -0.0013 | 0.0019 | 0.0006  |
|              | 14       | C-H...O        | 2.13 | 0.0211 | 0.0594         | -0.0172 | 0.0160 | -0.0012 |
|              | 15       | N-H...O        | 1.76 | 0.0356 | 0.1225         | -0.0281 | 0.0294 | 0.0013  |
|              | 16       | $lp\dots\pi$   | 3.13 | 0.0084 | 0.0314         | -0.0053 | 0.0066 | 0.0013  |
|              | 17       | $lp\dots\pi$   | 3.17 | 0.0089 | 0.0279         | -0.0052 | 0.0061 | 0.0009  |
|              | 18       | C-H... $\pi$   | 3.36 | 0.0027 | 0.0088         | -0.0012 | 0.0017 | 0.0005  |
|              | 19       | $\pi\dots\pi$  | 3.38 | 0.0062 | 0.0174         | -0.0029 | 0.0036 | 0.0007  |

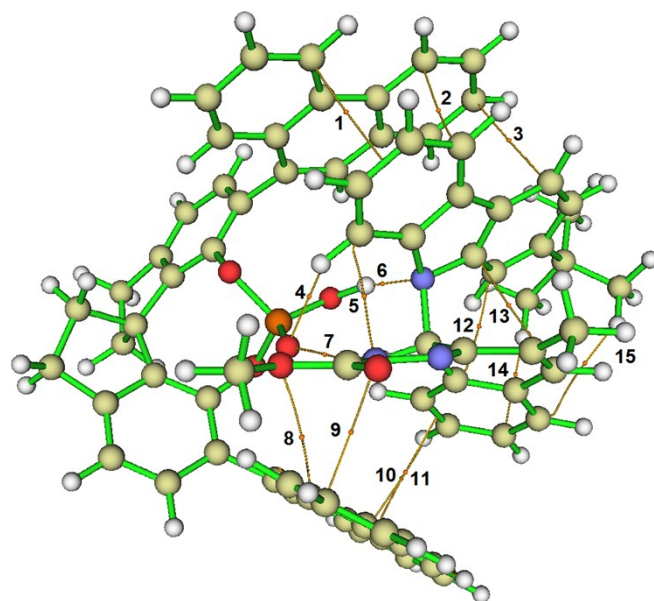

**Fig. S5** Intermolecular interactions in **IMI-1** and numbers of bond critical points (BCPs No.).

**Table S5** Numbers of bond critical points (BCPs No.) and the corresponding distances between atoms ( $d$ , in Å), classifications of the intermolecular interactions, electron density ( $\rho$ , in a.u.) and its Laplacian value ( $\nabla^2\rho$ , in a.u.), the electronic kinetic energy density ( $G$ , in a.u.), the electronic potential energy density ( $V$ , in a.u.) and the electronic energy density ( $H$ , in a.u.) at the BCPs of **IMI-1**.

|              | BCPs No. | Classification | $d$  | $\rho$ | $\nabla^2\rho$ | $G$     | $V$    | $H$     |
|--------------|----------|----------------|------|--------|----------------|---------|--------|---------|
| <b>IMI-1</b> | 1        | $\pi\dots\pi$  | 3.36 | 0.0066 | 0.0182         | -0.0030 | 0.0038 | 0.0008  |
|              | 2        | $\pi\dots\pi$  | 3.38 | 0.0060 | 0.0166         | -0.0028 | 0.0035 | 0.0007  |
|              | 3        | $\pi\dots\pi$  | 3.32 | 0.0069 | 0.0196         | -0.0033 | 0.0041 | 0.0008  |
|              | 4        | C-H...O        | 2.22 | 0.0171 | 0.0516         | -0.0135 | 0.0132 | -0.0003 |
|              | 5        | lp... $\pi$    | 2.94 | 0.0122 | 0.0411         | -0.0076 | 0.0089 | 0.0013  |
|              | 6        | O-H...N        | 1.61 | 0.0680 | 0.0928         | -0.0567 | 0.0400 | -0.0167 |
|              | 7        | N-H...O        | 2.02 | 0.0199 | 0.0640         | -0.0163 | 0.0162 | -0.0001 |
|              | 8        | C-H...O        | 2.63 | 0.0082 | 0.0322         | -0.0054 | 0.0068 | 0.0014  |
|              | 9        | lp... $\pi$    | 3.13 | 0.0089 | 0.0259         | -0.0052 | 0.0058 | 0.0006  |
|              | 10       | C-H... $\pi$   | 2.81 | 0.0070 | 0.0222         | -0.0034 | 0.0045 | 0.0011  |
|              | 11       | $\pi\dots\pi$  | 3.45 | 0.0063 | 0.0177         | -0.0029 | 0.0037 | 0.0008  |
|              | 12       | $\pi\dots\pi$  | 2.98 | 0.0123 | 0.0450         | -0.0073 | 0.0093 | 0.0020  |
|              | 13       | $\pi\dots\pi$  | 3.34 | 0.0073 | 0.0222         | -0.0040 | 0.0048 | 0.0008  |
|              | 14       | C-H... $\pi$   | 2.77 | 0.0069 | 0.0197         | -0.0032 | 0.0041 | 0.0009  |
|              | 15       | C-H... $\pi$   | 3.24 | 0.0028 | 0.0084         | -0.0011 | 0.0016 | 0.0005  |

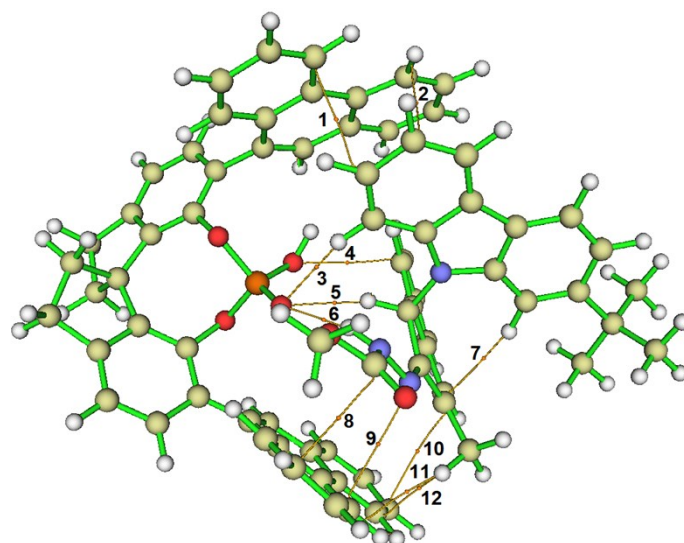

**Fig. S6** Intermolecular interactions in **IMI-2** and numbers of bond critical points (BCPs No.).

**Table S6** Numbers of bond critical points (BCPs No.) and the corresponding distances between atoms ( $d$ , in Å), classifications of the intermolecular interactions, electron density ( $\rho$ , in a.u.) and its Laplacian value ( $\nabla^2\rho$ , in a.u.), the electronic kinetic energy density ( $G$ , in a.u.), the electronic potential energy density ( $V$ , in a.u.) and the electronic energy density ( $H$ , in a.u.) at the BCPs of **IMI-2**.

|              | BCPs No. | Classification | $d$  | $\rho$ | $\nabla^2\rho$ | $G$     | $V$    | $H$     |
|--------------|----------|----------------|------|--------|----------------|---------|--------|---------|
| <b>IMI-2</b> | 1        | $\pi\dots\pi$  | 3.29 | 0.0074 | 0.0237         | -0.0036 | 0.0048 | 0.0012  |
|              | 2        | C-H... $\pi$   | 3.16 | 0.0044 | 0.0130         | -0.0020 | 0.0026 | 0.0006  |
|              | 3        | C-H...O        | 2.24 | 0.0163 | 0.0473         | -0.0128 | 0.0123 | -0.0005 |
|              | 4        | lp... $\pi$    | 3.07 | 0.0079 | 0.0280         | -0.0051 | 0.0061 | 0.0010  |
|              | 5        | C-H...O        | 2.37 | 0.0130 | 0.0389         | -0.0098 | 0.0097 | -0.0001 |
|              | 6        | N-H...O        | 2.06 | 0.0183 | 0.0591         | -0.0150 | 0.0149 | -0.0001 |
|              | 7        | C-H... $\pi$   | 2.55 | 0.0118 | 0.0356         | -0.0065 | 0.0077 | 0.0012  |
|              | 8        | $\pi\dots\pi$  | 3.11 | 0.0074 | 0.0269         | -0.0039 | 0.0053 | 0.0014  |
|              | 9        | lp... $\pi$    | 3.49 | 0.0051 | 0.0153         | -0.0027 | 0.0033 | 0.0006  |
|              | 10       | $\pi\dots\pi$  | 3.65 | 0.0044 | 0.0131         | -0.0020 | 0.0027 | 0.0007  |
|              | 11       | C-H... $\pi$   | 2.66 | 0.0082 | 0.0280         | -0.0042 | 0.0056 | 0.0014  |
|              | 12       | C-H... $\pi$   | 2.89 | 0.0068 | 0.0244         | -0.0034 | 0.0048 | 0.0014  |

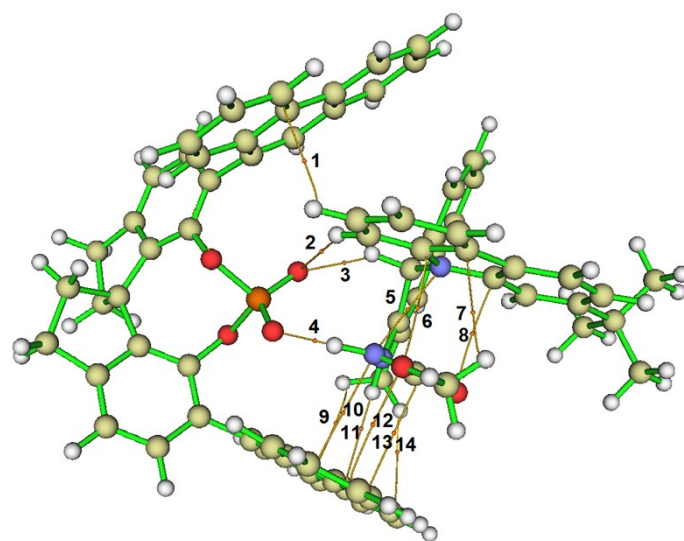

**Fig. S7** Intermolecular interactions in **IMI-3** and numbers of bond critical points (BCPs No.).

**Table S7** Numbers of bond critical points (BCPs No.) and the corresponding distances between atoms ( $d$ , in Å), classifications of the intermolecular interactions, electron density ( $\rho$ , in a.u.) and its Laplacian value ( $\nabla^2\rho$ , in a.u.), the electronic kinetic energy density ( $G$ , in a.u.), the electronic potential energy density ( $V$ , in a.u.) and the electronic energy density ( $H$ , in a.u.) at the BCPs of **IMI-3**.

|              | BCPs No. | Classification  | $d$  | $\rho$ | $\nabla^2\rho$ | $G$     | $V$    | $H$     |
|--------------|----------|-----------------|------|--------|----------------|---------|--------|---------|
| <b>IMI-3</b> | 1        | C-H... $\pi$    | 2.79 | 0.0073 | 0.0240         | -0.0036 | 0.0048 | 0.0012  |
|              | 2        | C-H... $\pi$    | 2.60 | 0.0088 | 0.0282         | -0.0056 | 0.0063 | 0.0007  |
|              | 3        | C-H...O         | 2.03 | 0.0234 | 0.0726         | -0.0192 | 0.0187 | -0.0005 |
|              | 4        | N-H...O         | 1.58 | 0.0601 | 0.1575         | -0.0530 | 0.0462 | -0.0068 |
|              | 5        | lp...lp         | 2.80 | 0.0168 | 0.0570         | -0.0124 | 0.0133 | 0.0009  |
|              | 6        | lp... $\pi$     | 3.14 | 0.0083 | 0.0288         | -0.0055 | 0.0063 | 0.0008  |
|              | 7        | C-H... $\pi$    | 2.84 | 0.0067 | 0.0227         | -0.0035 | 0.0046 | 0.0011  |
|              | 8        | $\pi$ ... $\pi$ | 3.11 | 0.0080 | 0.0278         | -0.0052 | 0.0061 | 0.0009  |
|              | 9        | C-H... $\pi$    | 2.73 | 0.0083 | 0.0282         | -0.0042 | 0.0056 | 0.0014  |
|              | 10       | lp... $\pi$     | 3.43 | 0.0061 | 0.0182         | -0.0036 | 0.0041 | 0.0005  |
|              | 11       | N-H... $\pi$    | 2.65 | 0.0074 | 0.0238         | -0.0041 | 0.0050 | 0.0009  |
|              | 12       | lp... $\pi$     | 3.15 | 0.0081 | 0.0264         | -0.0051 | 0.0058 | 0.0007  |
|              | 13       | $\pi$ ... $\pi$ | 3.28 | 0.0066 | 0.0223         | -0.0032 | 0.0044 | 0.0012  |
|              | 14       | C-H... $\pi$    | 2.93 | 0.0058 | 0.0183         | -0.0030 | 0.0038 | 0.0008  |

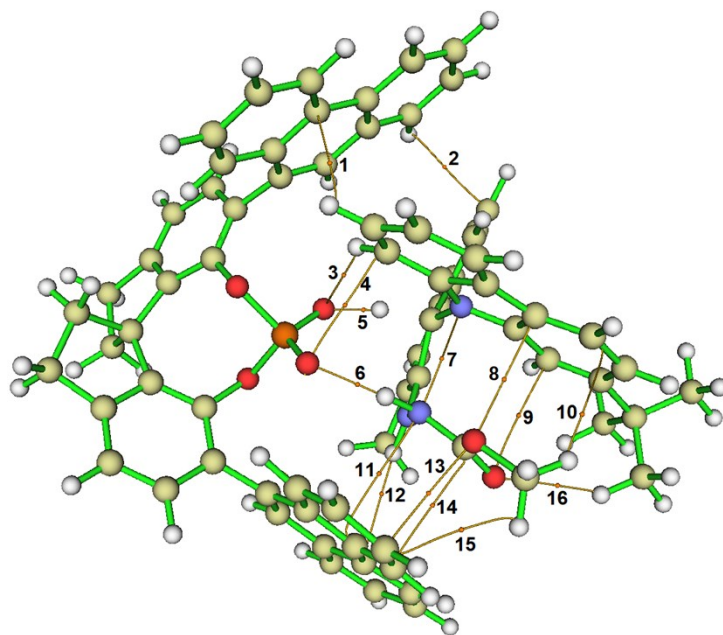

**Fig. S8** Intermolecular interactions in **TSI-2** and numbers of bond critical points (BCPs No.).



**Table S8** Numbers of bond critical points (BCPs No.) and the corresponding distances between atoms ( $d$ , in Å), classifications of the intermolecular interactions, electron density ( $\rho$ , in a.u.) and its Laplacian value ( $\nabla^2\rho$ , in a.u.), the electronic kinetic energy density ( $G$ , in a.u.), the electronic potential energy density ( $V$ , in a.u.) and the electronic energy density ( $H$ , in a.u.) at the BCPs of **TSI-2**.

|              | BCPs No. | Classification  | $d$  | $\rho$ | $\nabla^2\rho$ | $G$     | $V$    | $H$     |
|--------------|----------|-----------------|------|--------|----------------|---------|--------|---------|
| <b>TSI-2</b> | 1        | C-H... $\pi$    | 2.74 | 0.0085 | 0.0307         | -0.0045 | 0.0061 | 0.0016  |
|              | 2        | C-H... $\pi$    | 2.82 | 0.0068 | 0.0225         | -0.0032 | 0.0044 | 0.0012  |
|              | 3        | C-H... $\pi$    | 2.78 | 0.0070 | 0.0211         | -0.0035 | 0.0044 | 0.0009  |
|              | 4        | $\pi$ ... $\pi$ | 3.15 | 0.0082 | 0.0272         | -0.0048 | 0.0058 | 0.0010  |
|              | 5        | O...H           | 1.38 | 0.1071 | 0.0743         | -0.1220 | 0.0703 | -0.0517 |
|              | 6        | N-H...O         | 1.96 | 0.0245 | 0.0787         | -0.0204 | 0.0200 | -0.0004 |
|              | 7        | lp...lp         | 2.75 | 0.0183 | 0.0626         | -0.0137 | 0.0147 | 0.0010  |
|              | 8        | lp... $\pi$     | 3.23 | 0.0068 | 0.0231         | -0.0044 | 0.0051 | 0.0007  |
|              | 9        | $\pi$ ... $\pi$ | 3.24 | 0.0071 | 0.0224         | -0.0042 | 0.0049 | 0.0007  |
|              | 10       | C-H... $\pi$    | 2.84 | 0.0071 | 0.0205         | -0.0033 | 0.0042 | 0.0009  |
|              | 11       | lp... $\pi$     | 3.39 | 0.0064 | 0.0191         | -0.0038 | 0.0043 | 0.0005  |
|              | 12       | N-H... $\pi$    | 2.69 | 0.0068 | 0.0223         | -0.0038 | 0.0047 | 0.0009  |
|              | 13       | lp... $\pi$     | 3.03 | 0.0095 | 0.0308         | -0.0063 | 0.0070 | 0.0007  |
|              | 14       | $\pi$ ... $\pi$ | 3.14 | 0.0077 | 0.0269         | -0.0040 | 0.0054 | 0.0014  |
|              | 15       | C-H... $\pi$    | 2.91 | 0.0062 | 0.0234         | -0.0031 | 0.0045 | 0.0014  |
|              | 16       | C-H...O         | 2.67 | 0.0060 | 0.0220         | -0.0039 | 0.0047 | 0.0008  |

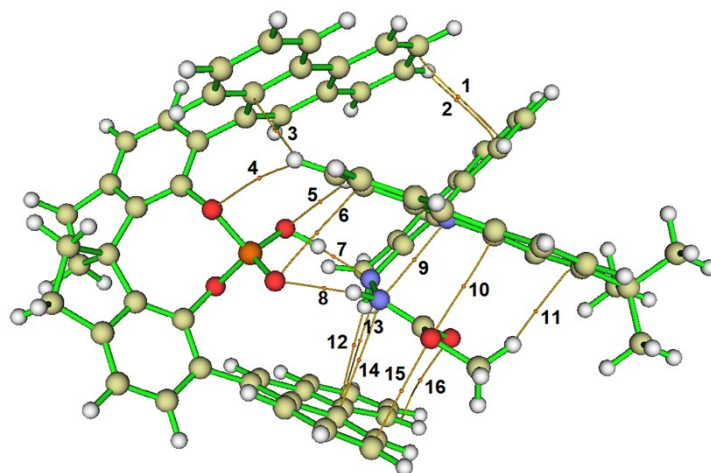

**Fig. S9** Intermolecular interactions in **IMI-4** and numbers of bond critical points (BCPs No.).

**Table S9** Numbers of bond critical points (BCPs No.) and the corresponding distances between atoms ( $d$ , in Å), classifications of the intermolecular interactions, electron density ( $\rho$ , in a.u.) and its Laplacian value ( $\nabla^2\rho$ , in a.u.), the electronic kinetic energy density ( $G$ , in a.u.), the electronic potential energy density ( $V$ , in a.u.) and the electronic energy density ( $H$ , in a.u.) at the BCPs of **IMI-4**.

|              | BCPs No. | Classification | $d$  | $\rho$ | $\nabla^2\rho$ | $G$     | $V$    | $H$     |
|--------------|----------|----------------|------|--------|----------------|---------|--------|---------|
| <b>IMI-4</b> | 1        | $\pi\dots\pi$  | 3.55 | 0.0050 | 0.0136         | -0.0023 | 0.0028 | 0.0005  |
|              | 2        | C-H... $\pi$   | 2.92 | 0.0062 | 0.0189         | -0.0029 | 0.0038 | 0.0009  |
|              | 3        | C-H... $\pi$   | 2.72 | 0.0080 | 0.0273         | -0.0044 | 0.0056 | 0.0012  |
|              | 4        | C-H...O        | 3.15 | 0.0025 | 0.0108         | -0.0013 | 0.0020 | 0.0007  |
|              | 5        | C-H...O        | 2.57 | 0.0085 | 0.0290         | -0.0057 | 0.0065 | 0.0008  |
|              | 6        | $\pi\dots\pi$  | 3.38 | 0.0057 | 0.0181         | -0.0031 | 0.0038 | 0.0007  |
|              | 7        | O-H...N        | 1.69 | 0.0561 | 0.1038         | -0.0432 | 0.0346 | -0.0086 |
|              | 8        | N-H...O        | 2.06 | 0.0204 | 0.0639         | -0.0170 | 0.0165 | -0.0005 |
|              | 9        | lp...lp        | 2.79 | 0.0171 | 0.0576         | -0.0124 | 0.0134 | 0.0010  |
|              | 10       | lp... $\pi$    | 3.20 | 0.0074 | 0.0263         | -0.0049 | 0.0058 | 0.0009  |
|              | 11       | C-H... $\pi$   | 2.74 | 0.0078 | 0.0247         | -0.0042 | 0.0052 | 0.0010  |
|              | 12       | N-H... $\pi$   | 2.87 | 0.0050 | 0.0163         | -0.0025 | 0.0033 | 0.0008  |
|              | 13       | C-H... $\pi$   | 2.77 | 0.0072 | 0.0216         | -0.0035 | 0.0044 | 0.0009  |
|              | 14       | lp... $\pi$    | 3.36 | 0.0065 | 0.0186         | -0.0036 | 0.0041 | 0.0005  |
|              | 15       | lp... $\pi$    | 3.14 | 0.0084 | 0.0272         | -0.0053 | 0.0060 | 0.0007  |
|              | 16       | $\pi\dots\pi$  | 3.38 | 0.0047 | 0.0179         | -0.0027 | 0.0036 | 0.0009  |

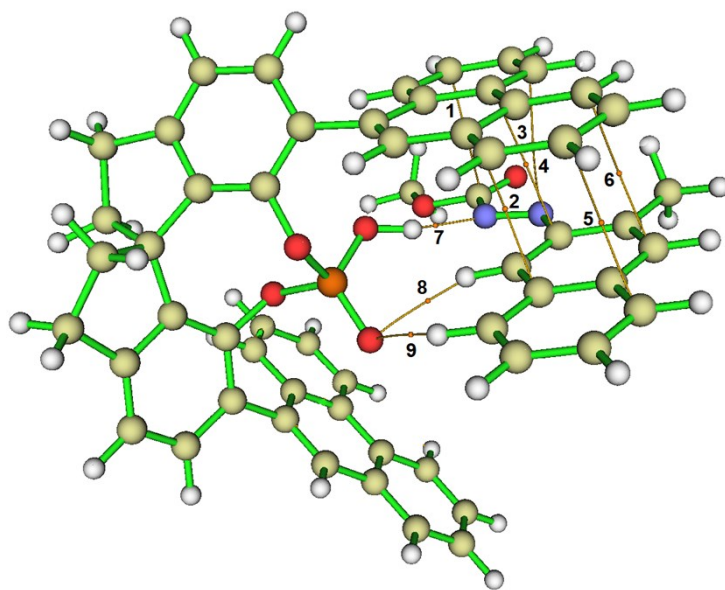

**Fig. S10** Intermolecular interactions in **DII** and numbers of bond critical points (BCPs No.).

**Table S10** Numbers of bond critical points (BCPs No.) and the corresponding distances between atoms ( $d$ , in Å), classifications of the intermolecular interactions, electron density ( $\rho$ , in a.u.) and its Laplacian value ( $\nabla^2\rho$ , in a.u.), the electronic kinetic energy density ( $G$ , in a.u.), the electronic potential energy density ( $V$ , in a.u.) and the electronic energy density ( $H$ , in a.u.) at the BCPs of **DII**.

|            | BCPs No. | Classification | $d$  | $\rho$ | $\nabla^2\rho$ | $G$     | $V$    | $H$     |
|------------|----------|----------------|------|--------|----------------|---------|--------|---------|
| <b>DII</b> | 1        | $\pi\dots\pi$  | 3.07 | 0.0082 | 0.0285         | -0.0043 | 0.0057 | 0.0014  |
|            | 2        | $\pi\dots\pi$  | 3.43 | 0.0058 | 0.0169         | -0.0028 | 0.0035 | 0.0007  |
|            | 3        | $\pi\dots\pi$  | 3.35 | 0.0064 | 0.0194         | -0.0032 | 0.0040 | 0.0008  |
|            | 4        | $\pi\dots\pi$  | 3.21 | 0.0072 | 0.0215         | -0.0038 | 0.0046 | 0.0008  |
|            | 5        | $\pi\dots\pi$  | 3.43 | 0.0060 | 0.0163         | -0.0027 | 0.0034 | 0.0007  |
|            | 6        | $\pi\dots\pi$  | 3.39 | 0.0066 | 0.0177         | -0.0031 | 0.0038 | 0.0007  |
|            | 7        | O-H...N        | 1.72 | 0.0492 | 0.1048         | -0.0358 | 0.0310 | -0.0048 |
|            | 8        | C-H...O        | 2.34 | 0.0135 | 0.0402         | -0.0099 | 0.0100 | 0.0001  |
|            | 9        | C-H...O        | 2.61 | 0.0073 | 0.0255         | -0.0048 | 0.0056 | 0.0008  |

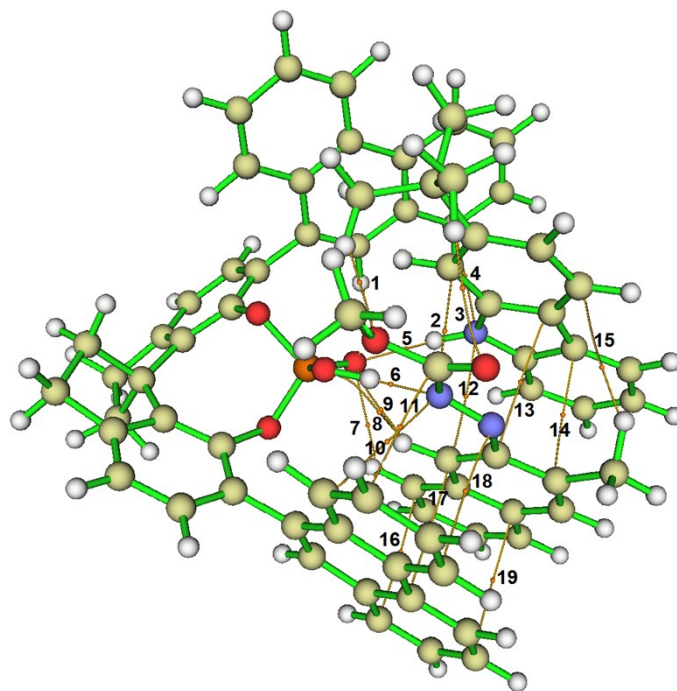

**Fig. S11** Intermolecular interactions in **COMII** and numbers of bond critical points (BCPs No.).

**Table S11** Numbers of bond critical points (BCPs No.) and the corresponding distances between atoms ( $d$ , in Å), classifications of the intermolecular interactions, electron density ( $\rho$ , in a.u.) and its Laplacian value ( $\nabla^2\rho$ , in a.u.), the electronic kinetic energy density ( $G$ , in a.u.), the electronic potential energy density ( $V$ , in a.u.) and the electronic energy density ( $H$ , in a.u.) at the BCPs of **COMII**.

|              | BCPs No. | Classification  | $d$  | $\rho$ | $\nabla^2\rho$ | $G$     | $V$    | $H$     |
|--------------|----------|-----------------|------|--------|----------------|---------|--------|---------|
| <b>COMII</b> | 1        | C-H...O         | 2.36 | 0.0126 | 0.0407         | -0.0095 | 0.0099 | 0.0004  |
|              | 2        | $\pi$ ... $\pi$ | 3.23 | 0.0079 | 0.0221         | -0.0043 | 0.0049 | 0.0006  |
|              | 3        | C-H... $\pi$    | 2.63 | 0.0078 | 0.0275         | -0.0051 | 0.0060 | 0.0009  |
|              | 4        | lp... $\pi$     | 3.29 | 0.0067 | 0.0190         | -0.0038 | 0.0043 | 0.0005  |
|              | 5        | N-H...O         | 1.95 | 0.0235 | 0.0815         | -0.0197 | 0.0200 | 0.0003  |
|              | 6        | O-H...N         | 1.68 | 0.0543 | 0.1034         | -0.0406 | 0.0332 | -0.0074 |
|              | 7        | C-H...O         | 2.58 | 0.0085 | 0.0301         | -0.0057 | 0.0066 | 0.0009  |
|              | 8        | C-H...O         | 2.54 | 0.0101 | 0.0405         | -0.0070 | 0.0086 | 0.0016  |
|              | 9        | C-H... $\pi$    | 2.54 | 0.0105 | 0.0383         | -0.0070 | 0.0083 | 0.0013  |
|              | 10       | $\pi$ ... $\pi$ | 3.26 | 0.0072 | 0.0219         | -0.0041 | 0.0048 | 0.0007  |
|              | 11       | $\pi$ ... $\pi$ | 3.00 | 0.0094 | 0.0349         | -0.0054 | 0.0071 | 0.0017  |
|              | 12       | lp... $\pi$     | 3.21 | 0.0079 | 0.0225         | -0.0046 | 0.0051 | 0.0005  |
|              | 13       | $\pi$ ... $\pi$ | 3.38 | 0.0065 | 0.0189         | -0.0033 | 0.0040 | 0.0007  |
|              | 14       | $\pi$ ... $\pi$ | 3.33 | 0.0069 | 0.0198         | -0.0034 | 0.0042 | 0.0008  |
|              | 15       | C-H... $\pi$    | 2.98 | 0.0045 | 0.0140         | -0.0020 | 0.0028 | 0.0008  |
|              | 16       | $\pi$ ... $\pi$ | 3.27 | 0.0074 | 0.0211         | -0.0036 | 0.0044 | 0.0008  |
|              | 17       | $\pi$ ... $\pi$ | 3.23 | 0.0078 | 0.0229         | -0.0038 | 0.0048 | 0.0010  |
|              | 18       | $\pi$ ... $\pi$ | 3.29 | 0.0063 | 0.0187         | -0.0033 | 0.0040 | 0.0007  |
|              | 19       | $\pi$ ... $\pi$ | 3.50 | 0.0052 | 0.0149         | -0.0024 | 0.0031 | 0.0007  |

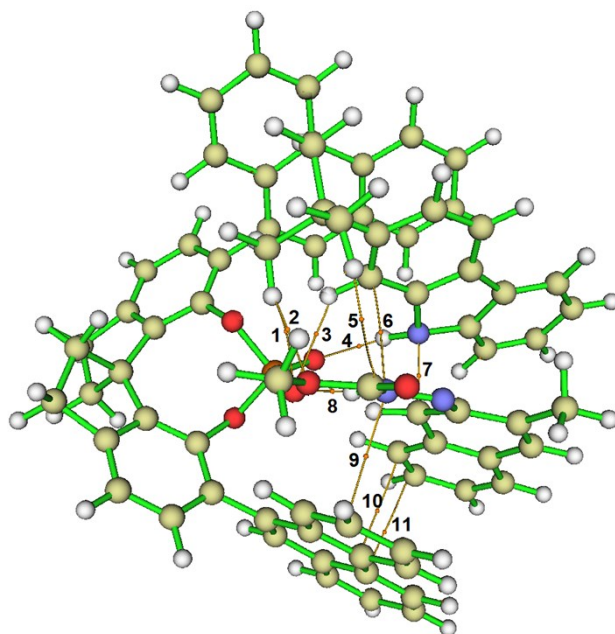

**Fig. S12** Intermolecular interactions in **TSII-1** and numbers of bond critical points (BCPs No.).



**Table S12** Numbers of bond critical points (BCPs No.) and the corresponding distances between atoms ( $d$ , in Å), classifications of the intermolecular interactions, electron density ( $\rho$ , in a.u.) and its Laplacian value ( $\nabla^2\rho$ , in a.u.), the electronic kinetic energy density ( $G$ , in a.u.), the electronic potential energy density ( $V$ , in a.u.) and the electronic energy density ( $H$ , in a.u.) at the BCPs of **TSII-1**.

|               | BCPs No. | Classification  | $d$  | $\rho$ | $\nabla^2\rho$ | $G$     | $V$    | $H$     |
|---------------|----------|-----------------|------|--------|----------------|---------|--------|---------|
| <b>TSII-1</b> | 1        | C-H...O         | 2.91 | 0.0046 | 0.0175         | -0.0026 | 0.0035 | 0.0009  |
|               | 2        | C-H...O         | 2.46 | 0.0104 | 0.0336         | -0.0075 | 0.0080 | 0.0005  |
|               | 3        | C-H... $\pi$    | 2.40 | 0.0132 | 0.0442         | -0.0096 | 0.0103 | 0.0007  |
|               | 4        | N-H...O         | 1.86 | 0.0313 | 0.0946         | -0.0249 | 0.0243 | -0.0006 |
|               | 5        | C-H... $\pi$    | 2.60 | 0.0075 | 0.0309         | -0.0045 | 0.0061 | 0.0016  |
|               | 6        | lp... $\pi$     | 3.08 | 0.0094 | 0.0291         | -0.0057 | 0.0065 | 0.0008  |
|               | 7        | C...N           | 2.05 | 0.0715 | 0.0790         | -0.0514 | 0.0356 | -0.0158 |
|               | 8        | N-H...O         | 1.76 | 0.0355 | 0.1210         | -0.0279 | 0.0291 | 0.0012  |
|               | 9        | lp... $\pi$     | 3.09 | 0.0098 | 0.0289         | -0.0057 | 0.0065 | 0.0008  |
|               | 10       | $\pi$ ... $\pi$ | 3.37 | 0.0063 | 0.0180         | -0.0029 | 0.0037 | 0.0008  |
|               | 11       | $\pi$ ... $\pi$ | 3.46 | 0.0056 | 0.0166         | -0.0027 | 0.0034 | 0.0007  |

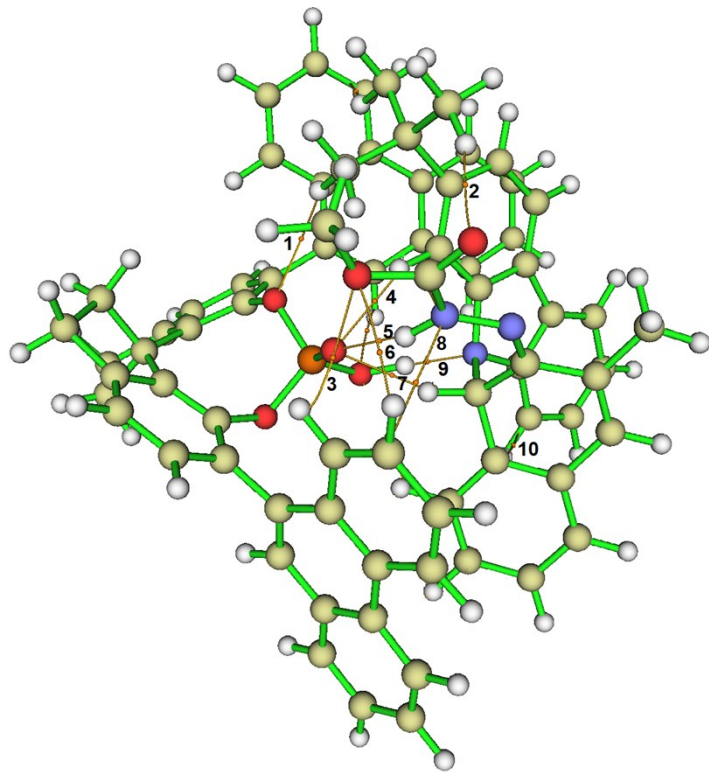

**Fig. S13** Intermolecular interactions in **IMII-1** and numbers of bond critical points (BCPs No.).

**Table S13** Numbers of bond critical points (BCPs No.) and the corresponding distances between atoms ( $d$ , in Å), classifications of the intermolecular interactions, electron density ( $\rho$ , in a.u.) and its Laplacian value ( $\nabla^2\rho$ , in a.u.), the electronic kinetic energy density ( $G$ , in a.u.), the electronic potential energy density ( $V$ , in a.u.) and the electronic energy density ( $H$ , in a.u.) at the BCPs of **IMII-1**.

|               | BCPs No. | Classification  | $d$  | $\rho$ | $\nabla^2\rho$ | $G$     | $V$    | $H$     |
|---------------|----------|-----------------|------|--------|----------------|---------|--------|---------|
| <b>IMII-1</b> | 1        | C-H...O         | 2.86 | 0.0043 | 0.0163         | -0.0025 | 0.0033 | 0.0008  |
|               | 2        | C-H... $\pi$    | 2.70 | 0.0063 | 0.0213         | -0.0037 | 0.0045 | 0.0008  |
|               | 3        | C-H...O         | 2.81 | 0.0054 | 0.0219         | -0.0034 | 0.0044 | 0.0010  |
|               | 4        | C-H... $\pi$    | 2.21 | 0.0178 | 0.0525         | -0.0142 | 0.0137 | -0.0005 |
|               | 5        | N-H...O         | 1.97 | 0.0221 | 0.0740         | -0.0182 | 0.0184 | 0.0002  |
|               | 6        | C-H...O         | 2.67 | 0.0073 | 0.0286         | -0.0048 | 0.0060 | 0.0012  |
|               | 7        | C-H...O         | 2.14 | 0.0208 | 0.0607         | -0.0170 | 0.0161 | -0.0009 |
|               | 8        | lp... $\pi$     | 3.23 | 0.0076 | 0.0220         | -0.0043 | 0.0049 | 0.0006  |
|               | 9        | O-H...N         | 1.64 | 0.0624 | 0.0964         | -0.0498 | 0.0369 | -0.0129 |
|               | 10       | $\pi$ ... $\pi$ | 2.95 | 0.0132 | 0.0503         | -0.0079 | 0.0102 | 0.0023  |

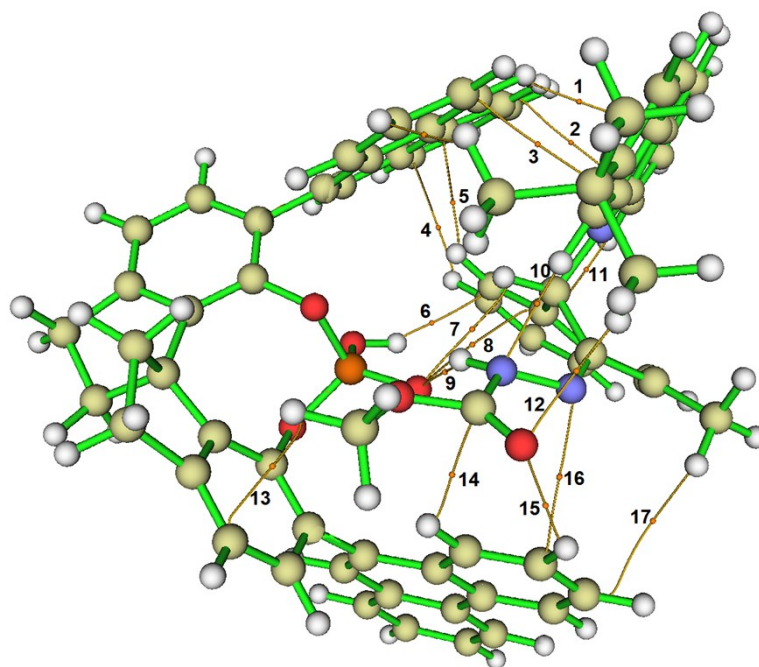

**Fig. S14** Intermolecular interactions in **IMII-2** and numbers of bond critical points (BCPs No.).

**Table S14** Numbers of bond critical points (BCPs No.) and the corresponding distances between atoms ( $d$ , in Å), classifications of the intermolecular interactions, electron density ( $\rho$ , in a.u.) and its Laplacian value ( $\nabla^2\rho$ , in a.u.), the electronic kinetic energy density ( $G$ , in a.u.), the electronic potential energy density ( $V$ , in a.u.) and the electronic energy density ( $H$ , in a.u.) at the BCPs of **IMII-2**.

|               | BCPs No. | Classification  | $d$  | $\rho$ | $\nabla^2\rho$ | $G$     | $V$    | $H$     |
|---------------|----------|-----------------|------|--------|----------------|---------|--------|---------|
| <b>IMII-2</b> | 1        | C-H... $\pi$    | 2.83 | 0.0064 | 0.0209         | -0.0032 | 0.0042 | 0.0010  |
|               | 2        | $\pi$ ... $\pi$ | 3.38 | 0.0064 | 0.0198         | -0.0030 | 0.0040 | 0.0010  |
|               | 3        | $\pi$ ... $\pi$ | 3.30 | 0.0072 | 0.0215         | -0.0035 | 0.0044 | 0.0009  |
|               | 4        | C-H... $\pi$    | 2.94 | 0.0052 | 0.0161         | -0.0024 | 0.0032 | 0.0008  |
|               | 5        | C-H... $\pi$    | 2.64 | 0.0090 | 0.0315         | -0.0050 | 0.0065 | 0.0015  |
|               | 6        | O-H... $\pi$    | 2.33 | 0.0138 | 0.0431         | -0.0084 | 0.0096 | 0.0012  |
|               | 7        | C-H...O         | 2.73 | 0.0074 | 0.0287         | -0.0049 | 0.0060 | 0.0011  |
|               | 8        | lp... $\pi$     | 3.21 | 0.0072 | 0.0236         | -0.0043 | 0.0051 | 0.0008  |
|               | 9        | N-H...O         | 1.91 | 0.0270 | 0.0893         | -0.0224 | 0.0224 | 0.0000  |
|               | 10       | C-H...N         | 2.19 | 0.0196 | 0.0579         | -0.0147 | 0.0146 | -0.0001 |
|               | 11       | C-H... $\pi$    | 2.42 | 0.0148 | 0.0556         | -0.0094 | 0.0117 | 0.0023  |
|               | 12       | C-H... $\pi$    | 2.55 | 0.0087 | 0.0290         | -0.0059 | 0.0066 | 0.0007  |
|               | 13       | C-H... $\pi$    | 3.02 | 0.0054 | 0.0169         | -0.0024 | 0.0033 | 0.0009  |
|               | 14       | C-H... $\pi$    | 2.57 | 0.0079 | 0.0335         | -0.0046 | 0.0065 | 0.0019  |
|               | 15       | C-H...O         | 2.48 | 0.0097 | 0.0333         | -0.0068 | 0.0076 | 0.0008  |
|               | 16       | $\pi$ ... $\pi$ | 3.15 | 0.0081 | 0.0255         | -0.0046 | 0.0055 | 0.0009  |
|               | 17       | C-H... $\pi$    | 3.17 | 0.0031 | 0.0102         | -0.0013 | 0.0019 | 0.0006  |

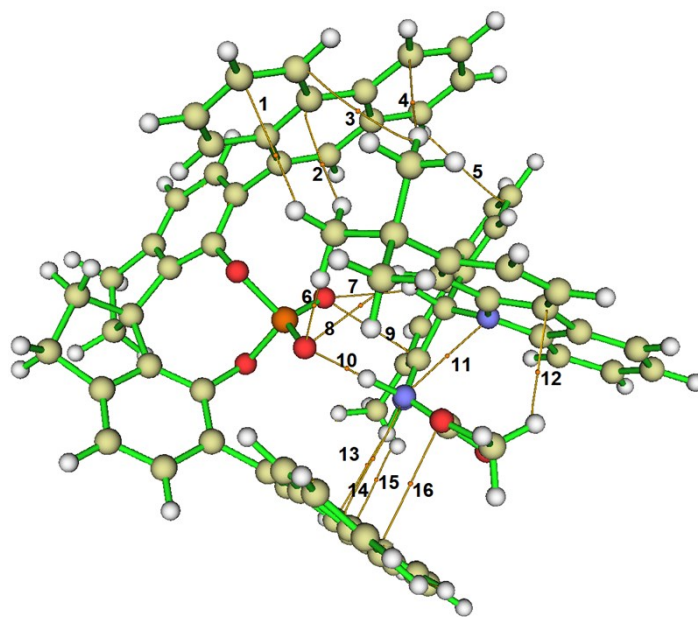

**Fig. S15** Intermolecular interactions in **IMII-3** and numbers of bond critical points (BCPs No.).

**Table S15** Numbers of bond critical points (BCPs No.) and the corresponding distances between atoms ( $d$ , in Å), classifications of the intermolecular interactions, electron density ( $\rho$ , in a.u.) and its Laplacian value ( $\nabla^2\rho$ , in a.u.), the electronic kinetic energy density ( $G$ , in a.u.), the electronic potential energy density ( $V$ , in a.u.) and the electronic energy density ( $H$ , in a.u.) at the BCPs of **IMII-3**.

|               | BCPs No. | Classification  | $d$  | $\rho$ | $\nabla^2\rho$ | $G$     | $V$    | $H$     |
|---------------|----------|-----------------|------|--------|----------------|---------|--------|---------|
| <b>IMII-3</b> | 1        | C-H... $\pi$    | 3.10 | 0.0044 | 0.0138         | -0.0021 | 0.0028 | 0.0007  |
|               | 2        | C-H... $\pi$    | 2.66 | 0.0089 | 0.0289         | -0.0047 | 0.0059 | 0.0012  |
|               | 3        | C-H... $\pi$    | 3.14 | 0.0041 | 0.0128         | -0.0019 | 0.0026 | 0.0007  |
|               | 4        | C-H... $\pi$    | 3.04 | 0.0039 | 0.0119         | -0.0017 | 0.0023 | 0.0006  |
|               | 5        | C-H... $\pi$    | 2.86 | 0.0063 | 0.0200         | -0.0028 | 0.0039 | 0.0011  |
|               | 6        | C-H...O         | 2.31 | 0.0143 | 0.0427         | -0.0109 | 0.0108 | -0.0001 |
|               | 7        | C-H...O         | 2.15 | 0.0195 | 0.0620         | -0.0157 | 0.0156 | -0.0001 |
|               | 8        | C-H... $\pi$    | 2.71 | 0.0069 | 0.0248         | -0.0044 | 0.0053 | 0.0009  |
|               | 9        | lp... $\pi$     | 2.83 | 0.0123 | 0.0455         | -0.0093 | 0.0103 | 0.0010  |
|               | 10       | N-H...O         | 1.62 | 0.0552 | 0.1508         | -0.0468 | 0.0422 | -0.0046 |
|               | 11       | lp...lp         | 2.80 | 0.0166 | 0.0568         | -0.0123 | 0.0132 | 0.0009  |
|               | 12       | C-H... $\pi$    | 2.84 | 0.0067 | 0.0207         | -0.0032 | 0.0042 | 0.0010  |
|               | 13       | N-H... $\pi$    | 2.45 | 0.0105 | 0.0322         | -0.0063 | 0.0072 | 0.0009  |
|               | 14       | lp... $\pi$     | 3.36 | 0.0069 | 0.0205         | -0.0039 | 0.0045 | 0.0006  |
|               | 15       | C-H... $\pi$    | 2.83 | 0.0070 | 0.0235         | -0.0035 | 0.0047 | 0.0012  |
|               | 16       | $\pi$ ... $\pi$ | 3.17 | 0.0080 | 0.0272         | -0.0053 | 0.0061 | 0.0008  |

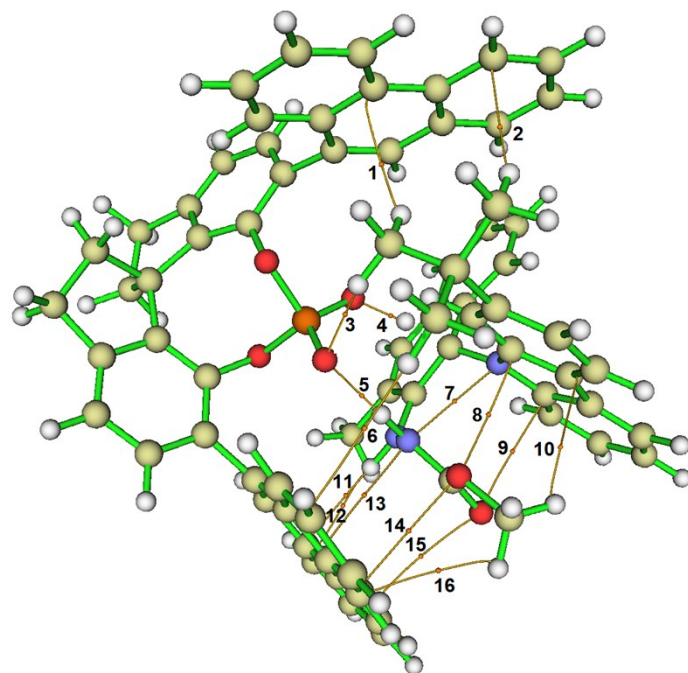

**Fig. S16** Intermolecular interactions in TSII-2 and numbers of bond critical points (BCPs No.).



**Table S16** Numbers of bond critical points (BCPs No.) and the corresponding distances between atoms ( $d$ , in Å), classifications of the intermolecular interactions, electron density ( $\rho$ , in a.u.) and its Laplacian value ( $\nabla^2\rho$ , in a.u.), the electronic kinetic energy density ( $G$ , in a.u.), the electronic potential energy density ( $V$ , in a.u.) and the electronic energy density ( $H$ , in a.u.) at the BCPs of **TSII-2**.

|               | BCPs No. | Classification  | $d$  | $\rho$ | $\nabla^2\rho$ | $G$     | $V$    | $H$     |
|---------------|----------|-----------------|------|--------|----------------|---------|--------|---------|
| <b>TSII-2</b> | 1        | C-H... $\pi$    | 2.68 | 0.0090 | 0.0311         | -0.0048 | 0.0063 | 0.0015  |
|               | 2        | C-H... $\pi$    | 2.79 | 0.0065 | 0.0193         | -0.0030 | 0.0039 | 0.0009  |
|               | 3        | C-H...O         | 2.28 | 0.0153 | 0.0454         | -0.0118 | 0.0116 | -0.0002 |
|               | 4        | O...H           | 1.33 | 0.1193 | 0.0122         | -0.1481 | 0.0756 | -0.0725 |
|               | 5        | N-H...O         | 1.81 | 0.0342 | 0.1046         | -0.0268 | 0.0265 | -0.0003 |
|               | 6        | C-H... $\pi$    | 3.63 | 0.0012 | 0.0038         | -0.0004 | 0.0007 | 0.0003  |
|               | 7        | lp...lp         | 2.79 | 0.0170 | 0.0573         | -0.0125 | 0.0134 | 0.0009  |
|               | 8        | lp... $\pi$     | 3.17 | 0.0078 | 0.0273         | -0.0051 | 0.0060 | 0.0009  |
|               | 9        | $\pi$ ... $\pi$ | 3.22 | 0.0067 | 0.0230         | -0.0042 | 0.0050 | 0.0008  |
|               | 10       | C-H... $\pi$    | 2.90 | 0.0064 | 0.0205         | -0.0031 | 0.0041 | 0.0010  |
|               | 11       | N-H... $\pi$    | 2.37 | 0.0125 | 0.0390         | -0.0080 | 0.0089 | 0.0009  |
|               | 12       | C-H... $\pi$    | 2.80 | 0.0070 | 0.0233         | -0.0034 | 0.0046 | 0.0012  |
|               | 13       | lp... $\pi$     | 3.27 | 0.0079 | 0.0237         | -0.0046 | 0.0053 | 0.0007  |
|               | 14       | lp... $\pi$     | 3.18 | 0.0076 | 0.0253         | -0.0050 | 0.0056 | 0.0006  |
|               | 15       | $\pi$ ... $\pi$ | 3.36 | 0.0051 | 0.0169         | -0.0029 | 0.0035 | 0.0006  |
|               | 16       | C-H... $\pi$    | 2.89 | 0.0059 | 0.0201         | -0.0029 | 0.0040 | 0.0011  |

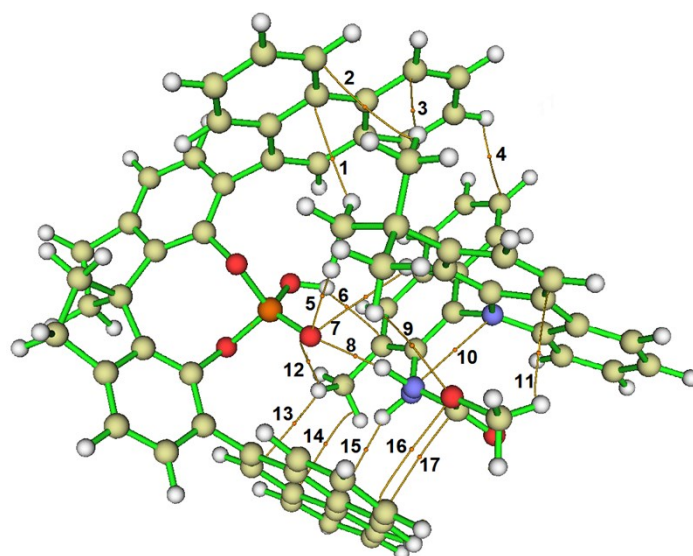

**Fig. S17** Intermolecular interactions in **IMII-4** and numbers of bond critical points (BCPs No.).

**Table S17** Numbers of bond critical points (BCPs No.) and the corresponding distances between atoms ( $d$ , in Å), classifications of the intermolecular interactions, electron density ( $\rho$ , in a.u.) and its Laplacian value ( $\nabla^2\rho$ , in a.u.), the electronic kinetic energy density ( $G$ , in a.u.), the electronic potential energy density ( $V$ , in a.u.) and the electronic energy density ( $H$ , in a.u.) at the BCPs of **IMII-4**.

|               | BCPs No. | Classification  | $d$  | $\rho$ | $\nabla^2\rho$ | $G$     | $V$    | $H$    |
|---------------|----------|-----------------|------|--------|----------------|---------|--------|--------|
| <b>IMII-4</b> | 1        | C-H... $\pi$    | 2.73 | 0.0080 | 0.0272         | -0.0042 | 0.0055 | 0.0013 |
|               | 2        | C-H... $\pi$    | 3.04 | 0.0049 | 0.0157         | -0.0024 | 0.0031 | 0.0007 |
|               | 3        | C-H... $\pi$    | 2.87 | 0.0055 | 0.0165         | -0.0025 | 0.0033 | 0.0008 |
|               | 4        | C-H... $\pi$    | 2.73 | 0.0072 | 0.0243         | -0.0035 | 0.0048 | 0.0013 |
|               | 5        | C-H...O         | 2.49 | 0.0099 | 0.0316         | -0.0069 | 0.0074 | 0.0005 |
|               | 6        | O-H... $\pi$    | 2.30 | 0.0154 | 0.0432         | -0.0094 | 0.0101 | 0.0007 |
|               | 7        | C-H...O         | 2.96 | 0.0039 | 0.0153         | -0.0022 | 0.0030 | 0.0008 |
|               | 8        | N-H...O         | 2.03 | 0.0196 | 0.0721         | -0.0166 | 0.0173 | 0.0007 |
|               | 9        | C-H...O         | 3.14 | 0.0023 | 0.0102         | -0.0013 | 0.0019 | 0.0006 |
|               | 10       | lp...lp         | 2.88 | 0.0143 | 0.0483         | -0.0105 | 0.0113 | 0.0008 |
|               | 11       | C-H... $\pi$    | 2.89 | 0.0064 | 0.0204         | -0.0030 | 0.0041 | 0.0011 |
|               | 12       | C-H... $\pi$    | 2.88 | 0.0058 | 0.0220         | -0.0030 | 0.0043 | 0.0013 |
|               | 13       | C-H... $\pi$    | 2.68 | 0.0086 | 0.0277         | -0.0046 | 0.0057 | 0.0011 |
|               | 14       | C-H... $\pi$    | 2.81 | 0.0080 | 0.0281         | -0.0042 | 0.0056 | 0.0014 |
|               | 15       | N-H... $\pi$    | 2.58 | 0.0087 | 0.0295         | -0.0051 | 0.0062 | 0.0011 |
|               | 16       | lp... $\pi$     | 3.16 | 0.0081 | 0.0279         | -0.0051 | 0.0060 | 0.0009 |
|               | 17       | $\pi$ ... $\pi$ | 3.08 | 0.0081 | 0.0301         | -0.0045 | 0.0060 | 0.0015 |

### 3. Mechanisms of Paths III and IV of the enantioselective (*S*)-C6-catalyzed Atroposelective C-H Amination Reaction.

Compared to paths I and II, paths III and IV are less favorable to generate experimental desired product **P** and undesired product *ent*-**P**, respectively. The Gibbs free energy profiles for paths III and IV are shown in Fig. S18 and Fig. S19, respectively. The optimized geometries of complexes, intermediates, transition states for paths III and IV are displayed in Fig. S20 and Fig. S21, respectively.

Similar to the cases in paths I and II, in path III (or IV), the interaction between the N1=N2R group of **R1** and O2-H2 group of (*S*)-C6 firstly occurs which needs an energy of 3.0 kcal/mol (or 4.1 kcal/mol), forming the dimeric complex **DIII** (or **DIV**), as shown in Fig. S18 (or Fig. S19). Then **DIII** (or **DIV**) interacts with **R2** via the O1...H3-N3 HB between the P=O1 group of (*S*)-C6 and N3-H3 group of **R2**, leading to the trimeric complex **COMIII** (or **COMIV**). Note that the process in forming **COMIII** (or **COMIV**) is endothermic which needs an energy of 20.6 (or 12.3) kcal/mol. It is even higher than that for the formation of **COMI** (or **COMII**), suggesting that the trimeric complex **COMIII** (or **COMIV**) formed in path III (or IV) is less favorable than that in path I (or II). In **COMIII** or **COMIV**, both **R1** and **R2** interact with (*S*)-C6 via O2-H2...N2 and O1...H3-N3 HBs, respectively. Then the proton transfer occurs in which the H2 atom is shifted to N2 atom, causing the conversion of O2-H2...N2 HB into O2...H2-N2 HB and the approaching of C1 and N3 atom with a distance of 2.12 Å in **TSIII** (or 2.11 Å **TSIV**). It needs to overcome an energy barrier of 15.9 kcal/mol (or 22.1 kcal/mol) from **COMIII** (or **COMIV**) to **TSIII** (or **TSIV**). The C1-N3 bond forms in **IMIII-1** (or **IMIV-1**) with a bond length of 1.51 Å (or 1.52 Å), and an energy of 10.4 kcal/mol (or 11.8 kcal/mol) is released. The O1...H3-

N3 HB is converted into O1–H3···N3 HB in **IMIII-1** (or **IMIV-1**) due to the proton transfer of H3 atom to O1 atom. The breakage of O1–H3···N3 HB results in **IMIII-2** (or **IMIV-2**) in which the N3 atom is recovered to sp<sup>3</sup> hybridization state, and (*S*)-**C6** is converted into its tautomer. The strong acidity of the tautomer (*S*)-**C6** enables the N1 atom to be protonation as N1–H3 bond in **IMIII-3** (or **IMIV-3**). Because of the steric repulsion existing between the *t*-Bu group and (*S*)-**C6** in **IMIII-3**, the O1···H1 interaction is not found. From **IMIV-2** to **IMIV-3**, the O2···H2–N2 HB is broken and the O2 atom further interacts with the newly formed N1–H3 bond as O2···H3–N1 HB. In addition, the O1···H1 interaction is found in **IMIV-3**. After absorbing an energy of 5.3 kcal/mol (or 6.1 kcal/mol), the transition state **TSIII-2** (or **TSIV-2**) forms in which the hydrogen abstraction occurs, and the H1 atom is located between O1 anion and C1 atom. The distance is 1.35 Å (or 1.37 Å) for O1···H1 interaction and 1.30 Å (or 1.30 Å) for C1···H1 interaction in **TSIII-2** (or **TSIV-2**). The H1 atom is finally transferred to O1 anion as O1–H1 bond, and the catalyst (*S*)-**C6** is recovered which interacts with the product **P** (or *ent*-**P**) via intermolecular interactions in **IMIII-4** (or **IMIV-4**). The broken of intermolecular interactions in **IMIII-4** (or **IMIV-4**) generates the catalyst (*S*)-**C6** and product **P** (or *ent*-**P**).

After comparison, it can be seen that paths **I** and **II** are considered to be the real reaction processes in leading to the product **P** and *ent*-**P**, respectively. The corresponding activation Gibbs free energies for paths **I** and **II** can be calculated as follows:

$$\Delta G_{\text{act}}(\mathbf{TSI-1}) = G(\mathbf{TSI-1}) - (G(\mathbf{R1}) + G(\mathbf{R2}) + G((S)\text{-C6}))$$

$$\Delta G_{\text{act}}(\mathbf{TSII-1}) = G(\mathbf{TSII-1}) - (G(\mathbf{R1}) + G(\mathbf{R2}) + G((S)\text{-C6}))$$

Therefore, the relative ratios for path **I** leading to the product **P** and path **II** leading to the product *ent*-**P** can be obtained:

$$\begin{aligned}
 & \mathbf{P}(\mathbf{TSI-1}) : \mathit{ent}\text{-}\mathbf{P}(\mathbf{TSII-1}) \\
 & = \exp\left(-\frac{\Delta G_{\text{act}}(\mathbf{TSI-1})}{RT}\right) : \exp\left(-\frac{\Delta G_{\text{act}}(\mathbf{TSII-1})}{RT}\right) \\
 & = 19.33 : 1.00
 \end{aligned}$$

where  $R = 1.986 \times 10^{-3} \text{ kcal (mol}\cdot\text{K)}^{-1}$  and  $T = 323.0 \text{ K}$ .

Accordingly, the ee value is calculated as:

$$\text{ee} = \frac{[\mathbf{P}] - [\mathit{ent}\text{-}\mathbf{P}]}{[\mathbf{P}] + [\mathit{ent}\text{-}\mathbf{P}]} \times 100\% = \frac{19.33 - 1.00}{19.33 + 1.00} \times 100\% = 90\%$$

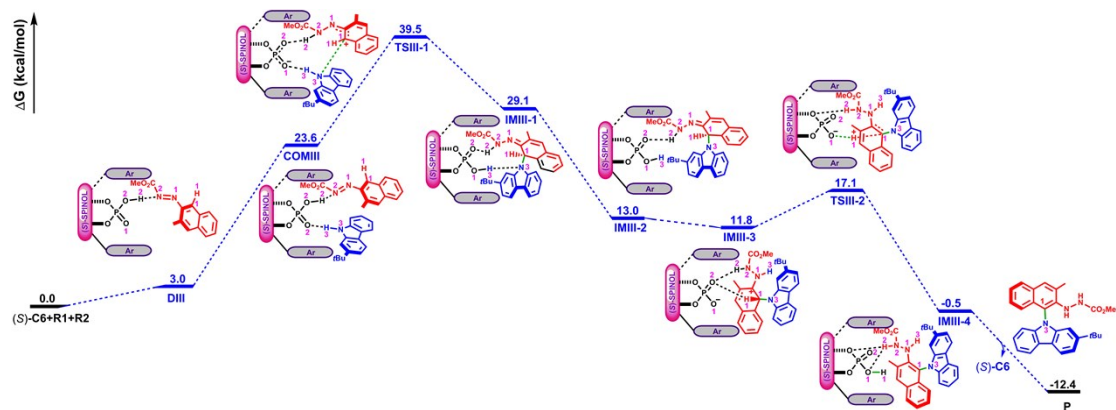

**Fig. S18** The path III for the reaction between **R1** and **R2** catalyzed by **(S)-C6** and the free energy profile of the whole processes. The Gibbs free energies of **[R1+R2+(S)-C6]** were set to 0.0 kcal/mol as a reference.

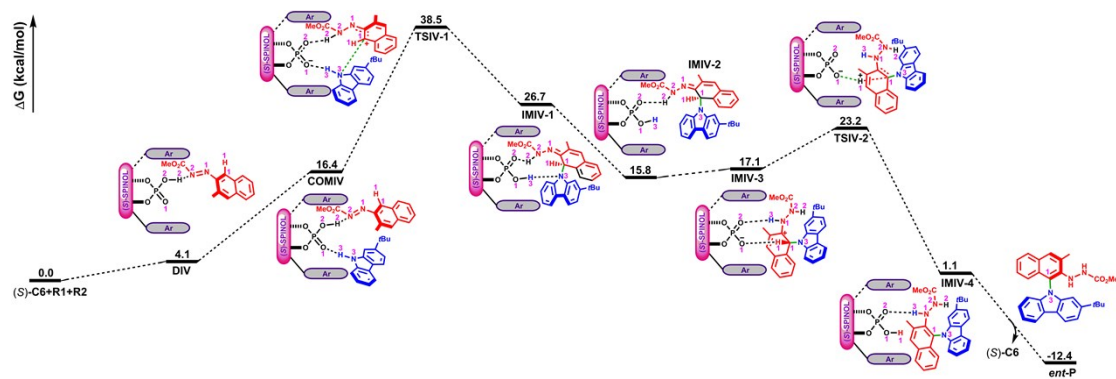

**Fig. S19** The path IV for the reaction between **R1** and **R2** catalyzed by **(S)-C6** and the free energy profile of the whole processes. The Gibbs free energies of **[R1+R2+(S)-C6]** were set to 0.0 kcal/mol as a reference.

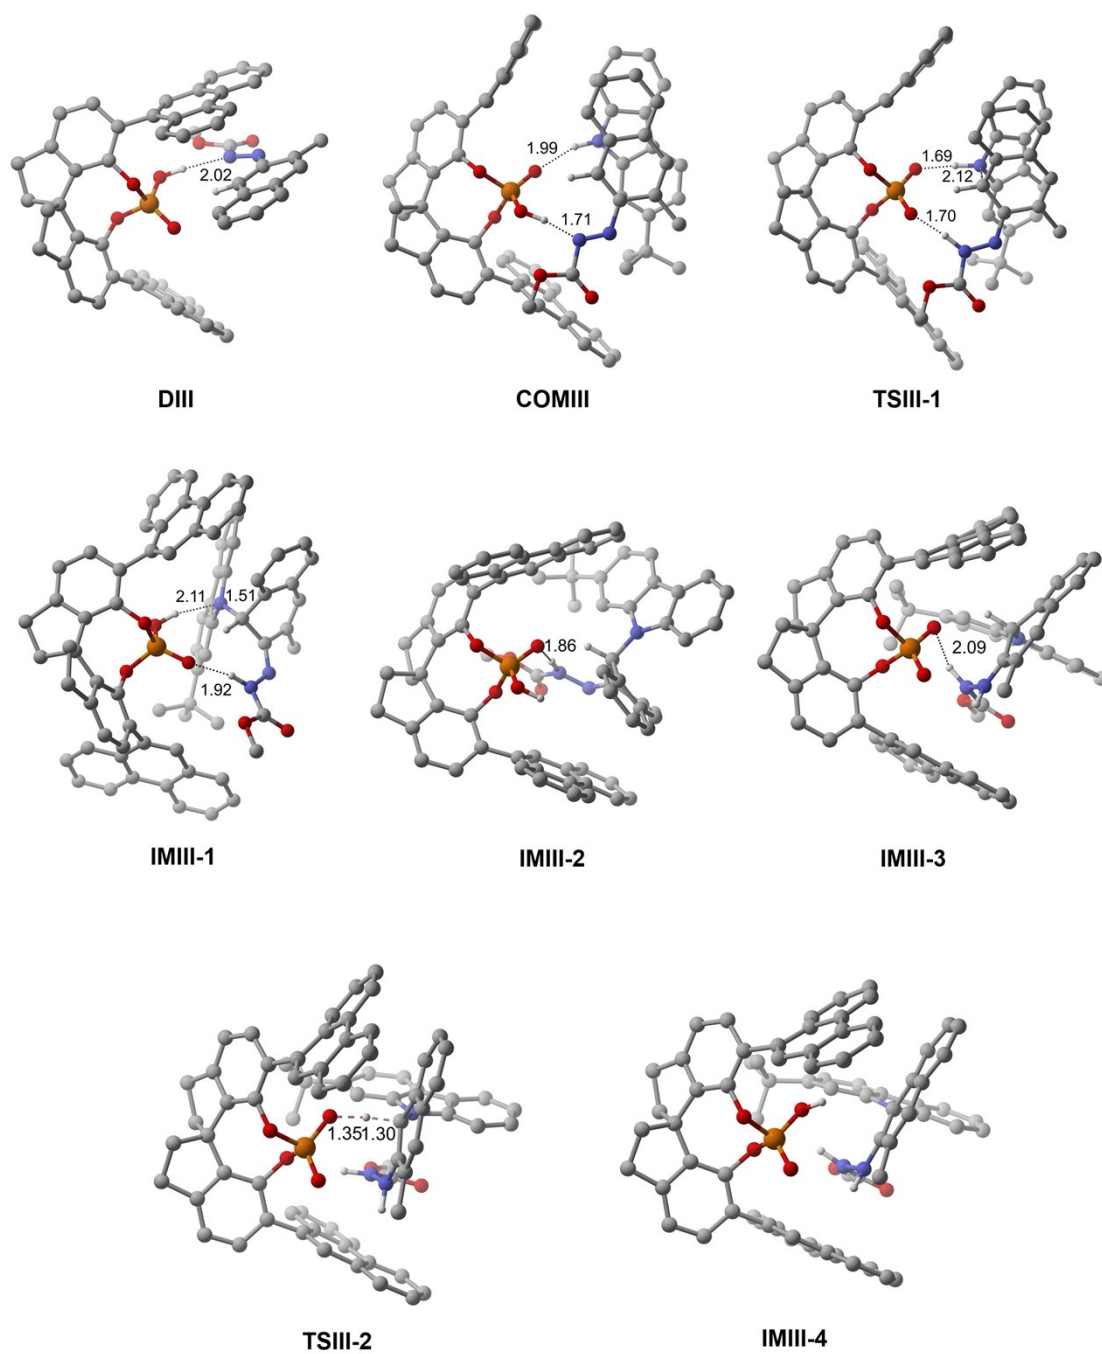

**Fig. S20** The optimized geometries of the complexes, transition states and intermediates in path **III**. The distances are in Å.



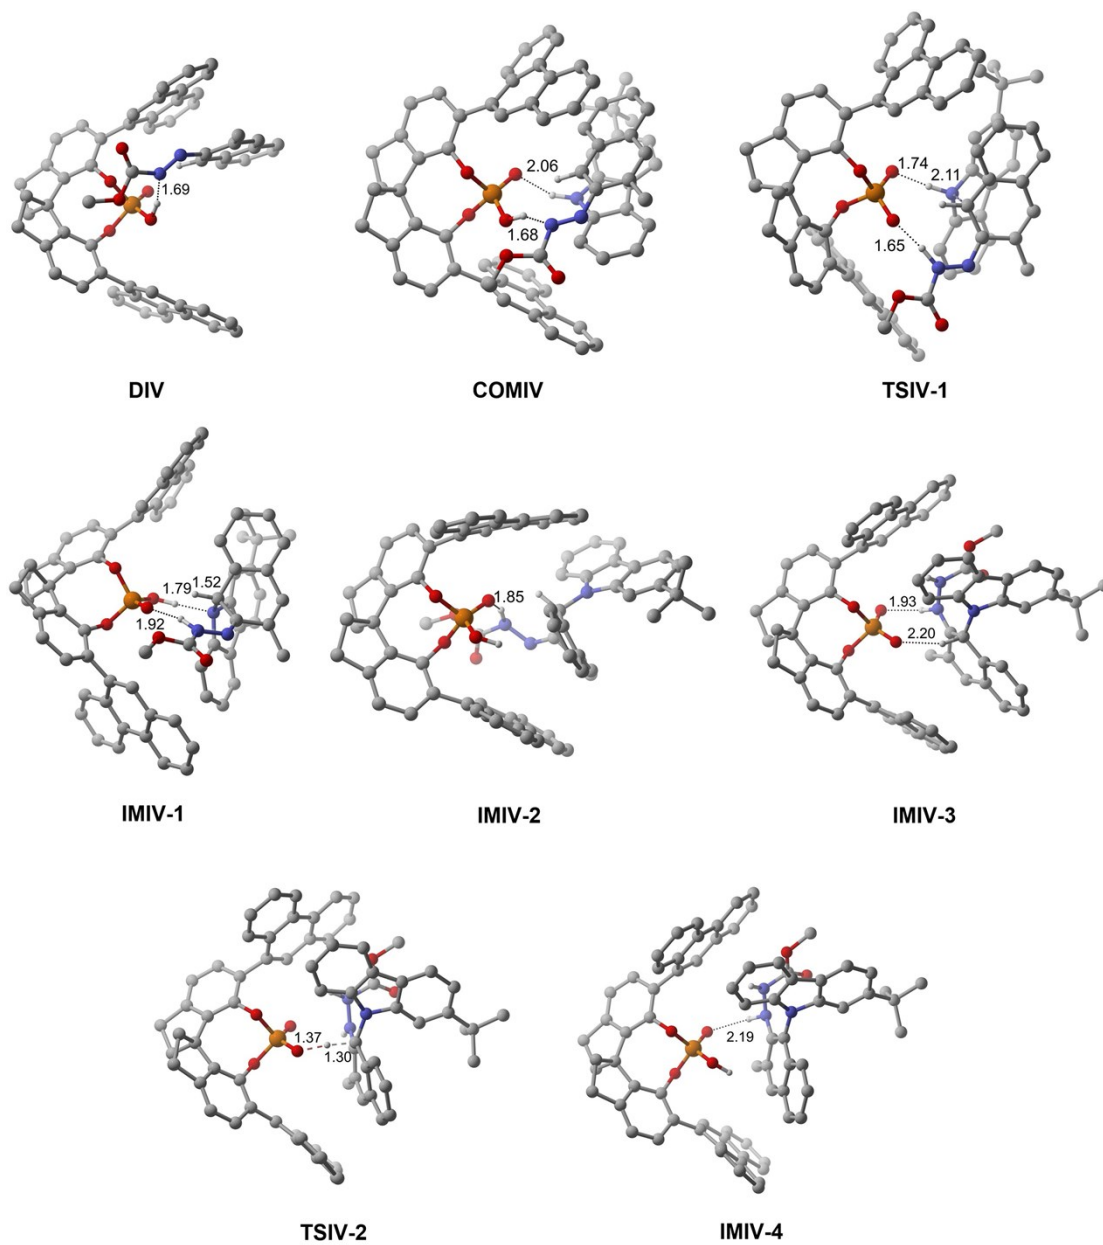

**Fig. S21** The optimized geometries of the complexes, transition states and intermediates in path IV. The distances are in Å.

#### 4. Cartesian Coordinates

##### R1

|   |             |             |             |
|---|-------------|-------------|-------------|
| C | -4.81723200 | -0.80844700 | -0.02096300 |
| C | -4.16985300 | 0.40106700  | 0.00207400  |
| C | -2.75162600 | 0.45975600  | 0.01353300  |
| C | -2.01474500 | -0.75992100 | 0.00016000  |
| C | -2.71321000 | -1.99849600 | -0.02098300 |
| C | -4.08324100 | -2.02175100 | -0.03277600 |
| H | -2.62490500 | 2.61650800  | 0.05908700  |
| H | -5.90233400 | -0.84206000 | -0.03007500 |
| H | -4.73222200 | 1.33056900  | 0.01207900  |
| C | -2.04958300 | 1.69399300  | 0.04386100  |
| C | -0.60478000 | -0.70052900 | 0.00665000  |
| H | -2.13912700 | -2.92081300 | -0.03085300 |
| H | -4.61394700 | -2.96819300 | -0.05153200 |
| C | 0.04340000  | 0.51633400  | 0.02879600  |
| C | -0.67774000 | 1.75069800  | 0.05975600  |
| H | -0.02253700 | -1.61682500 | 0.00279800  |
| N | 1.45751600  | 0.63793300  | 0.04561500  |
| N | 2.08152400  | -0.41949400 | -0.15781100 |
| C | 3.51088200  | -0.18805400 | -0.12378200 |
| O | 4.07420000  | 0.85340100  | -0.33241700 |
| O | 4.09416200  | -1.35093700 | 0.13458500  |
| C | 5.52507300  | -1.30915600 | 0.18979300  |
| H | 5.85404600  | -0.63473000 | 0.98333500  |
| H | 5.84191600  | -2.32885300 | 0.40067600  |
| H | 5.92930300  | -0.97173700 | -0.76678800 |
| C | 0.05803400  | 3.06236400  | 0.09804500  |
| H | 0.70872100  | 3.12428200  | 0.97481600  |
| H | 0.69907300  | 3.18347100  | -0.77988400 |
| H | -0.65043800 | 3.89245200  | 0.12939400  |

##### R2

|   |             |             |             |
|---|-------------|-------------|-------------|
| C | -1.48280000 | -1.42288300 | -0.00018200 |
| C | -1.99126000 | -0.10212100 | -0.00024800 |
| C | -1.09927400 | 0.96564100  | -0.00033100 |
| C | 0.27241100  | 0.69385600  | -0.00015500 |
| C | 0.77939100  | -0.62244000 | -0.00014600 |
| C | -0.12427000 | -1.69035600 | -0.00015400 |
| H | -2.18007800 | -2.25513100 | 0.00019600  |
| H | -1.44356600 | 1.99368600  | -0.00034300 |
| H | 0.23351600  | -2.71611400 | 0.00004100  |
| C | 2.51915700  | 0.87372400  | -0.00000100 |

|   |             |             |             |
|---|-------------|-------------|-------------|
| C | 3.83351900  | 1.34572700  | 0.00010100  |
| C | 4.85348200  | 0.40424600  | 0.00007500  |
| C | 4.57975700  | -0.97413900 | 0.00000400  |
| C | 3.27153000  | -1.43741200 | -0.00005000 |
| C | 2.22434300  | -0.51110400 | -0.00004300 |
| H | 4.04696600  | 2.40998200  | 0.00026700  |
| H | 5.88538100  | 0.74187000  | 0.00017700  |
| H | 5.40259900  | -1.68158100 | -0.00001300 |
| H | 3.06169600  | -2.50321400 | -0.00006500 |
| N | 1.33236800  | 1.57806600  | 0.00009600  |
| H | 1.25137600  | 2.58367000  | 0.00040100  |
| C | -3.50944500 | 0.10634400  | 0.00009700  |
| C | -3.89139800 | 1.58950900  | -0.00037400 |
| C | -4.11377900 | -0.54763600 | -1.25352300 |
| C | -4.11293800 | -0.54711100 | 1.25445700  |
| H | -3.51215000 | 2.10615000  | 0.88744200  |
| H | -3.51291900 | 2.10519500  | -0.88909400 |
| H | -4.98170200 | 1.68495500  | -0.00001500 |
| H | -3.91943100 | -1.62381700 | -1.28201200 |
| H | -5.19954400 | -0.40201700 | -1.26823500 |
| H | -3.69680500 | -0.10456400 | -2.16381800 |
| H | -5.19872200 | -0.40179300 | 1.26976300  |
| H | -3.91822700 | -1.62322300 | 1.28311300  |
| H | -3.69551400 | -0.10359800 | 2.16435400  |

**(S)-C6**

|   |             |            |             |
|---|-------------|------------|-------------|
| C | -1.07838700 | 2.99868700 | 0.25264000  |
| C | -1.64966400 | 3.82025800 | 1.23006800  |
| C | -2.84766400 | 3.47074000 | 1.84008300  |
| C | -3.46753000 | 2.27584400 | 1.48246100  |
| C | -2.89440600 | 1.40727500 | 0.54565300  |
| C | -1.68827400 | 1.79156900 | -0.05477900 |
| C | 0.57337100  | 4.56659900 | 0.87178500  |
| C | -0.76200900 | 5.01381900 | 1.49125400  |
| H | -3.29159300 | 4.11159500 | 2.59618800  |
| H | -4.40448800 | 1.98745300 | 1.95064400  |
| H | 1.12951800  | 3.96215800 | 1.59701600  |
| H | -1.15521500 | 5.90677900 | 0.98999500  |
| C | 0.16299700  | 3.65591900 | -0.32217100 |
| C | 1.34709000  | 2.86122100 | -0.84049800 |
| C | -0.15331800 | 4.53126500 | -1.56792900 |
| C | 2.01573200  | 3.59121200 | -1.83078100 |
| C | 1.84774500  | 1.62607000 | -0.46211700 |
| C | 1.22623700  | 4.83128000 | -2.18338100 |

|   |             |             |             |
|---|-------------|-------------|-------------|
| H | -0.72075300 | 5.42909700  | -1.30759900 |
| C | 3.21055800  | 3.12859500  | -2.36556700 |
| C | 3.06386900  | 1.14080000  | -0.96312800 |
| H | 1.18205600  | 5.00197500  | -3.26231100 |
| C | 3.73727500  | 1.92116800  | -1.90829700 |
| H | 3.72955800  | 3.69346600  | -3.13437000 |
| H | 4.68037400  | 1.55397400  | -2.30166100 |
| H | -0.68015600 | 5.24768300  | 2.55597500  |
| H | 1.21084300  | 5.39690800  | 0.55593900  |
| H | -0.74976200 | 3.93876100  | -2.27003600 |
| H | 1.67872600  | 5.72196300  | -1.73070300 |
| O | 1.10097600  | 0.81875600  | 0.40105100  |
| O | -1.05811400 | 0.91991900  | -0.94217900 |
| P | 0.01716600  | -0.12119300 | -0.33327200 |
| O | -0.62324200 | -0.73465900 | 0.98239800  |
| O | 0.48526100  | -1.03756900 | -1.37859400 |
| H | -1.17893000 | -1.51434300 | 0.81478400  |
| C | 3.60612300  | -0.18253400 | -0.54917300 |
| C | 3.82068000  | -1.13134600 | -1.49834800 |
| C | 3.92611400  | -0.46566000 | 0.83930000  |
| C | 4.32945200  | -2.43230100 | -1.17572000 |
| H | 3.56579600  | -0.92260000 | -2.53428100 |
| C | 4.42496600  | -1.74558800 | 1.19809500  |
| C | 3.77167000  | 0.51609800  | 1.84476600  |
| C | 4.51876400  | -3.39445700 | -2.19228600 |
| C | 4.62530700  | -2.75849700 | 0.16922600  |
| C | 4.72443300  | -1.99395900 | 2.55632100  |
| H | 3.41397600  | 1.50295300  | 1.56971000  |
| C | 4.07607900  | 0.24687200  | 3.16039700  |
| C | 4.99218900  | -4.65209400 | -1.89298700 |
| H | 4.27830600  | -3.12231200 | -3.21644800 |
| C | 5.10702800  | -4.05635700 | 0.44844900  |
| C | 4.55168800  | -1.02426200 | 3.52008200  |
| H | 5.10171500  | -2.96408000 | 2.85844500  |
| H | 3.94963600  | 1.01588100  | 3.91581100  |
| C | 5.28728700  | -4.98217400 | -0.55829100 |
| H | 5.13393700  | -5.38689600 | -2.67906200 |
| H | 5.34232000  | -4.34419300 | 1.46663000  |
| H | 4.78968100  | -1.24387700 | 4.55619500  |
| H | 5.65798900  | -5.97332500 | -0.31584300 |
| C | -3.56240500 | 0.12487300  | 0.18258600  |
| C | -3.95596500 | -0.08021400 | -1.10282700 |
| C | -3.82312500 | -0.89569500 | 1.18432400  |
| C | -4.67274800 | -1.25488700 | -1.50651200 |

|   |             |             |             |
|---|-------------|-------------|-------------|
| H | -3.74998400 | 0.67611700  | -1.85620600 |
| C | -4.53714600 | -2.07075700 | 0.82340400  |
| C | -3.34525900 | -0.76268000 | 2.50972400  |
| C | -5.08250400 | -1.41028800 | -2.84915500 |
| C | -4.98707400 | -2.25075200 | -0.55178200 |
| C | -4.76854700 | -3.04795200 | 1.81738600  |
| H | -2.76511300 | 0.11434000  | 2.77462000  |
| C | -3.58062900 | -1.73727800 | 3.45460200  |
| C | -5.79181300 | -2.52189900 | -3.24454000 |
| H | -4.82649100 | -0.63278400 | -3.56388300 |
| C | -5.71925700 | -3.37911700 | -0.98384700 |
| C | -4.30814300 | -2.88681200 | 3.10638600  |
| H | -5.31219000 | -3.95180700 | 1.56900600  |
| H | -3.19724400 | -1.61847100 | 4.46287800  |
| C | -6.11241400 | -3.51223300 | -2.29930600 |
| H | -6.10296800 | -2.63481400 | -4.27820600 |
| H | -5.98536600 | -4.16139400 | -0.28227800 |
| H | -4.49622400 | -3.65696700 | 3.84766000  |
| H | -6.67477300 | -4.38917100 | -2.60435200 |

**DI**

|   |             |             |             |
|---|-------------|-------------|-------------|
| C | -1.61088500 | -3.69639100 | 0.22777300  |
| C | -1.65817500 | -4.65036400 | 1.24941000  |
| C | -0.53446600 | -4.91895600 | 2.02053900  |
| C | 0.63787200  | -4.20481700 | 1.78267900  |
| C | 0.70087600  | -3.20439200 | 0.80526200  |
| C | -0.44712100 | -2.96716100 | 0.03685200  |
| C | -3.88992200 | -4.19448500 | 0.58615300  |
| C | -3.05015600 | -5.22668200 | 1.35890700  |
| H | -0.56976600 | -5.66313600 | 2.81097300  |
| H | 1.52384600  | -4.40220400 | 2.37973400  |
| H | -4.15160000 | -3.36312700 | 1.25036500  |
| H | -3.10068700 | -6.21489600 | 0.88554600  |
| C | -2.93196300 | -3.66029800 | -0.51938400 |
| C | -3.47628700 | -2.39406800 | -1.15553300 |
| C | -2.94899200 | -4.61830900 | -1.74374100 |
| C | -4.28594500 | -2.71602500 | -2.25085800 |
| C | -3.32951300 | -1.06389000 | -0.79509700 |
| C | -4.19372800 | -4.19559300 | -2.54714800 |
| H | -2.95945400 | -5.67006100 | -1.44417200 |
| C | -5.00211000 | -1.72921700 | -2.91586800 |
| C | -4.06354100 | -0.04761700 | -1.42270300 |
| H | -4.09670000 | -4.39955200 | -3.61685900 |
| C | -4.90566100 | -0.40785800 | -2.47995700 |
| H | -5.62750700 | -1.97905000 | -3.76795100 |
| H | -5.47495200 | 0.37339800  | -2.97483600 |
| H | -3.37176500 | -5.34591700 | 2.39694100  |
| H | -4.81429500 | -4.60446700 | 0.16971600  |
| H | -2.04718800 | -4.43899000 | -2.33908800 |
| H | -5.09125300 | -4.71943000 | -2.19673400 |
| O | -2.40357500 | -0.72037300 | 0.18694500  |
| O | -0.44918200 | -1.92937900 | -0.89187500 |
| P | -0.89107700 | -0.47352200 | -0.33348400 |
| O | -0.18402400 | -0.30198100 | 1.04685500  |
| O | -0.69759300 | 0.54163000  | -1.38283900 |
| H | 0.48722300  | 0.43518900  | 1.18287500  |
| C | -3.91920800 | 1.37515700  | -1.00768300 |
| C | -3.51511700 | 2.29529000  | -1.92264400 |
| C | -4.20975600 | 1.79429200  | 0.35357300  |
| C | -3.32921800 | 3.67733200  | -1.58736300 |
| H | -3.28050500 | 1.97873300  | -2.93587100 |
| C | -4.02312800 | 3.15123800  | 0.72670200  |
| C | -4.69431300 | 0.88050500  | 1.31711800  |
| C | -2.89066100 | 4.59488300  | -2.56736300 |

|   |             |             |             |
|---|-------------|-------------|-------------|
| C | -3.56638400 | 4.11797800  | -0.26403200 |
| C | -4.29946400 | 3.52705300  | 2.06050500  |
| H | -4.86681400 | -0.15135900 | 1.02932400  |
| C | -4.95980100 | 1.27599500  | 2.60911000  |
| C | -2.69127300 | 5.92053400  | -2.25288000 |
| H | -2.70833000 | 4.23089200  | -3.57499100 |
| C | -3.35141000 | 5.48226800  | 0.03171300  |
| C | -4.75192100 | 2.61248100  | 2.98649900  |
| H | -4.15976300 | 4.55570000  | 2.37225900  |
| H | -5.33271700 | 0.55651900  | 3.33129200  |
| C | -2.92497900 | 6.36405300  | -0.93951700 |
| H | -2.35122700 | 6.61903100  | -3.01090600 |
| H | -3.51784000 | 5.85792400  | 1.03473000  |
| H | -4.95761900 | 2.92923700  | 4.00440500  |
| H | -2.76582400 | 7.40737200  | -0.68523400 |
| C | 1.96316000  | -2.44506600 | 0.57580400  |
| C | 2.55363900  | -2.49311600 | -0.64912800 |
| C | 2.60232900  | -1.70143200 | 1.64872600  |
| C | 3.83885200  | -1.91128900 | -0.90262100 |
| H | 2.06525000  | -3.02672000 | -1.46088500 |
| C | 3.88195100  | -1.12288500 | 1.43896200  |
| C | 1.95529500  | -1.50127200 | 2.89198400  |
| C | 4.42867400  | -2.01971300 | -2.18119100 |
| C | 4.53284200  | -1.25693900 | 0.14268800  |
| C | 4.47233000  | -0.39229300 | 2.49562500  |
| H | 0.95803800  | -1.90387900 | 3.03434400  |
| C | 2.55682100  | -0.78303200 | 3.90355400  |
| C | 5.68537800  | -1.51073400 | -2.42080600 |
| H | 3.87263800  | -2.51724300 | -2.97117000 |
| C | 5.82320700  | -0.75090800 | -0.12890900 |
| C | 3.82974600  | -0.22397800 | 3.70366400  |
| H | 5.44815600  | 0.06023800  | 2.35938400  |
| H | 2.03951800  | -0.63566800 | 4.84719100  |
| C | 6.38899200  | -0.87842600 | -1.38034100 |
| H | 6.13278600  | -1.59707600 | -3.40604200 |
| H | 6.38835600  | -0.24948300 | 0.64892500  |
| H | 4.30060200  | 0.35490600  | 4.49183800  |
| H | 7.38086300  | -0.47631900 | -1.56439600 |
| C | 4.25034100  | 1.01998600  | -4.59804600 |
| C | 4.94647500  | 1.62969400  | -3.58371000 |
| C | 4.37614300  | 1.74610000  | -2.28970600 |
| C | 3.07125500  | 1.22061100  | -2.06951500 |
| C | 2.37141100  | 0.59211000  | -3.13620000 |
| C | 2.95295700  | 0.49322500  | -4.37405700 |

|   |             |            |             |
|---|-------------|------------|-------------|
| H | 6.06071400  | 2.76218000 | -1.39347100 |
| H | 4.69576100  | 0.93544900 | -5.58476500 |
| H | 5.94215300  | 2.03002200 | -3.75530000 |
| C | 5.06351000  | 2.36744500 | -1.21305800 |
| C | 2.49826900  | 1.33469000 | -0.78663900 |
| H | 1.37404000  | 0.20435000 | -2.94080900 |
| H | 2.42248700  | 0.01350300 | -5.19039900 |
| C | 3.19875100  | 1.93519000 | 0.24134700  |
| C | 4.51033900  | 2.47348000 | 0.03823400  |
| H | 1.48257700  | 0.98194800 | -0.64553200 |
| N | 2.69338500  | 2.10601600 | 1.54224100  |
| N | 1.60969700  | 1.56234100 | 1.82681200  |
| C | 1.20989500  | 1.88058900 | 3.18926200  |
| O | 1.85336400  | 2.48600200 | 4.00210400  |
| O | -0.00588200 | 1.38648000 | 3.35647400  |
| C | -0.60071800 | 1.63845700 | 4.63373100  |
| H | -0.66057600 | 2.71375800 | 4.81470900  |
| H | -1.59735900 | 1.20445300 | 4.58283000  |
| H | -0.01305300 | 1.16676400 | 5.42468600  |
| C | 5.24979100  | 3.12509000 | 1.17439000  |
| H | 4.70653100  | 3.99671400 | 1.55073600  |
| H | 5.36286000  | 2.43831700 | 2.01840300  |
| H | 6.24038300  | 3.44616900 | 0.84537200  |



**DI<sub>R2</sub>**

|   |             |             |             |
|---|-------------|-------------|-------------|
| C | 4.35265500  | -1.61785600 | -0.53336100 |
| C | 5.55546000  | -1.82420200 | 0.15126000  |
| C | 6.22408500  | -0.76262200 | 0.74772500  |
| C | 5.66955900  | 0.51301600  | 0.68055100  |
| C | 4.44045400  | 0.74344100  | 0.05090100  |
| C | 3.79925000  | -0.34705400 | -0.55103700 |
| C | 4.57190800  | -3.94863100 | -0.23431100 |
| C | 5.90872200  | -3.29281000 | 0.15365100  |
| H | 7.15991200  | -0.92422200 | 1.27452400  |
| H | 6.17721900  | 1.35219000  | 1.14738300  |
| H | 3.95056200  | -4.07111300 | 0.65989000  |
| H | 6.68757200  | -3.50636700 | -0.58841100 |
| C | 3.89087300  | -2.91286000 | -1.17571300 |
| C | 2.42694400  | -3.24915700 | -1.39900300 |
| C | 4.44034900  | -3.07699200 | -2.62063200 |
| C | 2.30095800  | -4.10347900 | -2.50053400 |
| C | 1.29045400  | -2.89237600 | -0.68923800 |
| C | 3.62936900  | -4.24746100 | -3.20538100 |
| H | 5.52096000  | -3.24293800 | -2.63213400 |
| C | 1.06999200  | -4.65389700 | -2.82879800 |
| C | 0.03178800  | -3.43435100 | -0.98594500 |
| H | 3.52839400  | -4.19329600 | -4.29260600 |
| C | -0.04472600 | -4.33409000 | -2.05691100 |
| H | 0.97057100  | -5.32132300 | -3.67979200 |
| H | -1.01066300 | -4.77030800 | -2.29256400 |
| H | 6.28218600  | -3.62939800 | 1.12432300  |
| H | 4.68398400  | -4.92618900 | -0.71096400 |
| H | 4.22678600  | -2.16183000 | -3.18322400 |
| H | 4.09379000  | -5.21211000 | -2.96816000 |
| O | 1.39908700  | -1.92031100 | 0.31506000  |
| O | 2.54035100  | -0.16102900 | -1.13157700 |
| P | 1.25625500  | -0.40645600 | -0.19616700 |
| O | 1.52331900  | 0.29939200  | 1.19794700  |
| O | 0.02392300  | -0.04528500 | -0.91924600 |
| H | 1.33737800  | 1.25438800  | 1.20162800  |
| C | -1.21094900 | -3.04767700 | -0.26123800 |
| C | -2.27896400 | -2.62087300 | -0.99005200 |
| C | -1.33153100 | -3.16496300 | 1.18225200  |
| C | -3.52580700 | -2.25452500 | -0.38633300 |
| H | -2.18866600 | -2.52717300 | -2.07000700 |
| C | -2.53946400 | -2.77288100 | 1.81910000  |
| C | -0.28452900 | -3.69751400 | 1.96935200  |
| C | -4.60944700 | -1.83385500 | -1.18820600 |

|   |             |             |             |
|---|-------------|-------------|-------------|
| C | -3.65905700 | -2.28885900 | 1.02166700  |
| C | -2.62890300 | -2.89628600 | 3.22431900  |
| H | 0.62413000  | -4.03586000 | 1.48275900  |
| C | -0.40278400 | -3.81070900 | 3.33641000  |
| C | -5.79769800 | -1.43814000 | -0.61609700 |
| H | -4.48128100 | -1.82130300 | -2.26780000 |
| C | -4.87901300 | -1.85451200 | 1.58483100  |
| C | -1.58525900 | -3.39663700 | 3.97135000  |
| H | -3.53591000 | -2.59396200 | 3.73505200  |
| H | 0.41412600  | -4.22438900 | 3.91938800  |
| C | -5.92433000 | -1.44115300 | 0.78422000  |
| H | -6.62334200 | -1.10519800 | -1.23789000 |
| H | -5.00574900 | -1.82662400 | 2.66111700  |
| H | -1.68306900 | -3.47889000 | 5.04944300  |
| H | -6.84844100 | -1.10150400 | 1.24237100  |
| C | 3.84342100  | 2.10843300  | 0.01222700  |
| C | 3.60554000  | 2.70005300  | -1.18901400 |
| C | 3.53598400  | 2.82511300  | 1.23978100  |
| C | 3.10629800  | 4.03976100  | -1.29784700 |
| H | 3.82325300  | 2.15962600  | -2.10691800 |
| C | 3.04430100  | 4.15679400  | 1.17129500  |
| C | 3.67476800  | 2.20859300  | 2.50649400  |
| C | 2.90356700  | 4.62220900  | -2.56852000 |
| C | 2.83811700  | 4.78738900  | -0.12655900 |
| C | 2.74966700  | 4.82687800  | 2.37965600  |
| H | 4.00846000  | 1.17788800  | 2.55717300  |
| C | 3.37217800  | 2.88676200  | 3.66712400  |
| C | 2.45077800  | 5.91711200  | -2.68468300 |
| H | 3.11778000  | 4.02870300  | -3.45316100 |
| C | 2.37745900  | 6.11428700  | -0.27493400 |
| C | 2.91454300  | 4.21237700  | 3.60211900  |
| H | 2.37470500  | 5.84326700  | 2.35500300  |
| H | 3.48114800  | 2.39332200  | 4.62761200  |
| C | 2.18730500  | 6.66652000  | -1.52437800 |
| H | 2.29929500  | 6.35959900  | -3.66404300 |
| H | 2.16638600  | 6.72062200  | 0.59834100  |
| H | 2.67625600  | 4.75154700  | 4.51339600  |
| H | 1.83217500  | 7.68858000  | -1.61052700 |
| C | -5.63889700 | 2.19600000  | -1.13169700 |
| C | -4.59920600 | 1.77216000  | -1.99550800 |
| C | -3.42570700 | 1.27124200  | -1.44330500 |
| C | -3.32202500 | 1.19294400  | -0.05027200 |
| C | -4.35265300 | 1.62391200  | 0.81201900  |
| C | -5.52728300 | 2.13324900  | 0.24765600  |

|   |             |             |             |
|---|-------------|-------------|-------------|
| H | -6.55605300 | 2.58647700  | -1.56297800 |
| H | -2.59931400 | 0.92476000  | -2.05457700 |
| H | -6.34558000 | 2.46735200  | 0.87991600  |
| C | -2.60417600 | 0.78577200  | 2.03625600  |
| C | -1.86761800 | 0.38599600  | 3.15451700  |
| C | -2.44618400 | 0.56793700  | 4.40332500  |
| C | -3.72477500 | 1.13561200  | 4.54543900  |
| C | -4.45173400 | 1.53512500  | 3.43153700  |
| C | -3.89319100 | 1.36444400  | 2.16079500  |
| H | -0.88630800 | -0.06671100 | 3.04461200  |
| H | -1.89903200 | 0.25821300  | 5.28890700  |
| H | -4.14605000 | 1.26070200  | 5.53793000  |
| H | -5.44049800 | 1.97154300  | 3.54366500  |
| N | -2.27778500 | 0.70471100  | 0.70176500  |
| H | -1.44055200 | 0.29190900  | 0.30000600  |
| C | -4.81421200 | 1.86537800  | -3.50968900 |
| C | -3.59508500 | 1.37841600  | -4.29843600 |
| C | -6.02088300 | 0.99633700  | -3.90204800 |
| C | -5.09094800 | 3.32573600  | -3.90391900 |
| H | -2.70469400 | 1.97528400  | -4.07610100 |
| H | -3.36598800 | 0.32922500  | -4.08336200 |
| H | -3.79543100 | 1.46265900  | -5.37143300 |
| H | -6.93417600 | 1.31679900  | -3.39174300 |
| H | -6.19924200 | 1.05789700  | -4.98155300 |
| H | -5.84061000 | -0.05356500 | -3.64673500 |
| H | -5.24647200 | 3.40129500  | -4.98591800 |
| H | -5.98456400 | 3.71859300  | -3.40983600 |
| H | -4.24634100 | 3.96810800  | -3.63469400 |

**COMI**

|   |             |             |             |
|---|-------------|-------------|-------------|
| C | -4.86167000 | -1.15402800 | -1.03049000 |
| C | -5.88282500 | -1.89664000 | -0.42775400 |
| C | -5.62398400 | -3.15125800 | 0.10817400  |
| C | -4.32466800 | -3.65149900 | 0.06534400  |
| C | -3.26657400 | -2.89964200 | -0.45942100 |
| C | -3.56326200 | -1.64086500 | -1.00005400 |
| C | -6.69623300 | 0.30846400  | -0.77892300 |
| C | -7.17624700 | -1.11607000 | -0.44425200 |
| H | -6.41829000 | -3.73321500 | 0.56645600  |
| H | -4.10918000 | -4.63395600 | 0.47545500  |
| H | -6.38548000 | 0.81861300  | 0.13943100  |
| H | -7.85524000 | -1.50070200 | -1.21482200 |
| C | -5.44454600 | 0.09062300  | -1.67515200 |
| C | -4.64703400 | 1.36652600  | -1.87500400 |
| C | -5.89252900 | -0.19248000 | -3.13846500 |
| C | -5.09929600 | 2.03892800  | -3.01742400 |
| C | -3.62119000 | 1.92414400  | -1.12565900 |
| C | -6.12297600 | 1.20116100  | -3.74648400 |
| H | -6.77189200 | -0.84069200 | -3.18018700 |
| C | -4.58114100 | 3.27833600  | -3.36514600 |
| C | -3.07416700 | 3.17362900  | -1.45298700 |
| H | -5.98261900 | 1.22190900  | -4.83039000 |
| C | -3.58356700 | 3.84078900  | -2.57222500 |
| H | -4.93363500 | 3.79772900  | -4.25145200 |
| H | -3.16327400 | 4.80873700  | -2.82863900 |
| H | -7.70438800 | -1.17267000 | 0.51129800  |
| H | -7.45521100 | 0.92159000  | -1.27301700 |
| H | -5.07237200 | -0.69190900 | -3.66507400 |
| H | -7.13823800 | 1.56166600  | -3.54135900 |
| O | -3.09912600 | 1.20673100  | -0.04656700 |
| O | -2.52162100 | -0.82965900 | -1.45373800 |
| P | -1.88360000 | 0.19326000  | -0.37406600 |
| O | -1.80576500 | -0.57408600 | 0.98308500  |
| O | -0.65927500 | 0.79961900  | -0.93152300 |
| H | -0.91616800 | -0.81789900 | 1.39648500  |
| C | -1.92195900 | 3.74699300  | -0.70460000 |
| C | -0.75602300 | 3.95324100  | -1.37309600 |
| C | -2.01496000 | 4.08521800  | 0.70235400  |
| C | 0.42895900  | 4.41710400  | -0.71444800 |
| H | -0.68796100 | 3.69400300  | -2.42691500 |
| C | -0.87004600 | 4.57707500  | 1.38233500  |
| C | -3.22908900 | 3.94254300  | 1.41147400  |
| C | 1.64385400  | 4.52585100  | -1.42781200 |

|   |             |             |             |
|---|-------------|-------------|-------------|
| C | 0.39635300  | 4.69488600  | 0.67256500  |
| C | -0.99172000 | 4.90993600  | 2.74972700  |
| H | -4.10603300 | 3.57494000  | 0.88757000  |
| C | -3.31669800 | 4.26873300  | 2.74672300  |
| C | 2.80890700  | 4.87530400  | -0.78299000 |
| H | 1.64340300  | 4.30869800  | -2.49315800 |
| C | 1.60885600  | 5.03552000  | 1.31167800  |
| C | -2.18608600 | 4.75966400  | 3.42107600  |
| H | -0.13303400 | 5.29362300  | 3.28884100  |
| H | -4.25860400 | 4.15228200  | 3.27349600  |
| C | 2.78917100  | 5.11881000  | 0.60247600  |
| H | 3.74244600  | 4.94270500  | -1.33312700 |
| H | 1.62968700  | 5.21221900  | 2.38115600  |
| H | -2.25137500 | 5.02388900  | 4.47206300  |
| H | 3.71084100  | 5.36373200  | 1.12078300  |
| C | -1.87701600 | -3.43808400 | -0.46694700 |
| C | -1.21914400 | -3.56667700 | -1.65146700 |
| C | -1.23388000 | -3.87963800 | 0.75896800  |
| C | 0.08315300  | -4.15722700 | -1.74515800 |
| H | -1.69533500 | -3.23268400 | -2.57038200 |
| C | 0.04833000  | -4.48901800 | 0.70320300  |
| C | -1.84962900 | -3.69671400 | 2.02039800  |
| C | 0.72694600  | -4.26067400 | -2.99794100 |
| C | 0.72915600  | -4.62713300 | -0.57738700 |
| C | 0.64224100  | -4.92220200 | 1.91029600  |
| H | -2.79760400 | -3.17266000 | 2.07339800  |
| C | -1.25542700 | -4.15206300 | 3.17752000  |
| C | 1.99029800  | -4.79804300 | -3.09770700 |
| H | 0.21139300  | -3.88980700 | -3.87993300 |
| C | 2.02425800  | -5.17721500 | -0.70810100 |
| C | 0.00244800  | -4.77233600 | 3.12215800  |
| H | 1.62242900  | -5.38486300 | 1.89324400  |
| H | -1.74812000 | -4.00681800 | 4.13493900  |
| C | 2.64218200  | -5.25651400 | -1.93851100 |
| H | 2.48572600  | -4.86108700 | -4.06152700 |
| H | 2.55684900  | -5.53604800 | 0.16514400  |
| H | 0.48205600  | -5.11227100 | 4.03435200  |
| H | 3.64259400  | -5.67236400 | -2.01122800 |
| C | 3.53184700  | -1.56653000 | -3.82554000 |
| C | 4.17838100  | -1.96229500 | -2.67971700 |
| C | 3.52117800  | -1.90414700 | -1.42368300 |
| C | 2.16136600  | -1.48543800 | -1.38693400 |
| C | 1.51525500  | -1.07513600 | -2.58524400 |
| C | 2.19335600  | -1.10026400 | -3.77731000 |

|   |             |             |             |
|---|-------------|-------------|-------------|
| H | 5.22808600  | -2.51895000 | -0.24785700 |
| H | 4.04954700  | -1.60737500 | -4.77972900 |
| H | 5.20127000  | -2.32614100 | -2.71740000 |
| C | 4.17777900  | -2.23895400 | -0.20939600 |
| C | 1.48811600  | -1.47873700 | -0.14913100 |
| H | 0.48399600  | -0.73605400 | -2.52373300 |
| H | 1.70410100  | -0.77978300 | -4.69185700 |
| C | 2.14914900  | -1.81274500 | 1.01444800  |
| C | 3.53263100  | -2.18382200 | 1.00114400  |
| H | 0.44045200  | -1.20936600 | -0.13149200 |
| N | 1.54819000  | -1.81809200 | 2.28855400  |
| N | 0.36594000  | -1.43650100 | 2.38213000  |
| C | -0.08812100 | -1.50056000 | 3.76263200  |
| O | 0.53388900  | -1.90698100 | 4.70543600  |
| O | -1.32768900 | -1.03024600 | 3.78753100  |
| C | -1.92078700 | -0.96388100 | 5.08536700  |
| H | -1.31158900 | -0.34395900 | 5.74783400  |
| H | -2.90293000 | -0.51748700 | 4.94065200  |
| H | -2.01438600 | -1.96465200 | 5.51378500  |
| C | 4.25039300  | -2.45836500 | 2.29193600  |
| H | 4.21796300  | -1.57529800 | 2.93929200  |
| H | 3.77935500  | -3.27336800 | 2.84880000  |
| H | 5.29471400  | -2.71342600 | 2.10026900  |
| C | 5.97079600  | 1.06845800  | 0.21706200  |
| C | 5.37285000  | 1.33428600  | -1.03920200 |
| C | 3.99047000  | 1.47812100  | -1.11341300 |
| C | 3.24218200  | 1.40694600  | 0.06753200  |
| C | 3.84413000  | 1.17142800  | 1.32436500  |
| C | 5.22919200  | 0.98524900  | 1.38393900  |
| H | 7.04934900  | 0.95413500  | 0.27504900  |
| H | 3.48415000  | 1.66675800  | -2.05421900 |
| H | 5.72127500  | 0.79780500  | 2.33488200  |
| C | 1.59146900  | 1.49149700  | 1.58492700  |
| C | 0.36238000  | 1.65057500  | 2.22966700  |
| C | 0.34212000  | 1.53088500  | 3.61372800  |
| C | 1.50616400  | 1.22944600  | 4.34251100  |
| C | 2.72466400  | 1.06598200  | 3.69577500  |
| C | 2.78045000  | 1.21743600  | 2.30542100  |
| H | -0.53721400 | 1.89236400  | 1.67280500  |
| H | -0.59950600 | 1.67091000  | 4.13724100  |
| H | 1.45018200  | 1.12215700  | 5.42126100  |
| H | 3.62462100  | 0.84255200  | 4.26239500  |
| N | 1.88911400  | 1.58906700  | 0.24553800  |
| H | 1.18101700  | 1.64073900  | -0.47857700 |

|   |            |             |             |
|---|------------|-------------|-------------|
| C | 6.27833200 | 1.53789000  | -2.25970800 |
| C | 5.47345200 | 1.77156600  | -3.54099000 |
| C | 7.16215200 | 2.77280800  | -2.01232800 |
| C | 7.18217200 | 0.31465000  | -2.47191100 |
| H | 4.80979400 | 0.92750700  | -3.75659400 |
| H | 4.86522900 | 2.68008800  | -3.47368700 |
| H | 6.15728700 | 1.89150700  | -4.38763100 |
| H | 7.80125000 | 2.63869900  | -1.13431800 |
| H | 7.80965500 | 2.95603700  | -2.87733300 |
| H | 6.54842700 | 3.66505400  | -1.84931500 |
| H | 7.84443100 | 0.48135000  | -3.32882800 |
| H | 7.81106400 | 0.11345100  | -1.59988100 |
| H | 6.58276300 | -0.57803000 | -2.67194700 |

**TSI-1**Value of imaginary frequency = -295.7 cm<sup>-1</sup>

|   |             |             |             |
|---|-------------|-------------|-------------|
| C | 4.98977400  | 0.11592000  | -1.04255000 |
| C | 6.15983100  | 0.43658800  | -0.34838900 |
| C | 6.28070300  | 1.65747000  | 0.30428900  |
| C | 5.20606000  | 2.54567500  | 0.28454000  |
| C | 3.99868700  | 2.22123700  | -0.34499200 |
| C | 3.91228900  | 0.98804500  | -1.01044100 |
| C | 6.23128800  | -1.88068200 | -0.86983800 |
| C | 7.13392700  | -0.71729900 | -0.41544300 |
| H | 7.19127100  | 1.91500100  | 0.83745500  |
| H | 5.28857700  | 3.50434000  | 0.78924700  |
| H | 5.73782200  | -2.32419300 | 0.00225300  |
| H | 7.92390600  | -0.51864900 | -1.15025900 |
| C | 5.15001200  | -1.20797600 | -1.76425000 |
| C | 3.98020400  | -2.13880600 | -2.04250500 |
| C | 5.70604000  | -1.01600500 | -3.20409100 |
| C | 4.22160300  | -2.86943000 | -3.21165100 |
| C | 2.81125600  | -2.36999000 | -1.32686100 |
| C | 5.47788300  | -2.37478300 | -3.88940500 |
| H | 6.75188500  | -0.69571500 | -3.20230400 |
| C | 3.34808300  | -3.86744300 | -3.62113500 |
| C | 1.92729100  | -3.39351900 | -1.69991200 |
| H | 5.36214200  | -2.29090300 | -4.97345400 |
| C | 2.21916300  | -4.13653500 | -2.84891800 |
| H | 3.53645500  | -4.42926200 | -4.53154200 |
| H | 1.53400200  | -4.92642900 | -3.14281600 |
| H | 7.62316100  | -0.90767900 | 0.54369200  |
| H | 6.77199200  | -2.67182700 | -1.39724400 |
| H | 5.11169900  | -0.24600900 | -3.70789500 |
| H | 6.31379800  | -3.06017500 | -3.70296800 |
| O | 2.49533900  | -1.56010600 | -0.25170700 |
| O | 2.72266100  | 0.59419800  | -1.59736600 |
| P | 1.67522100  | -0.17462500 | -0.59706500 |
| O | 1.57322300  | 0.53925700  | 0.71528400  |
| O | 0.45280600  | -0.44317200 | -1.42353600 |
| H | 0.55731200  | 1.12685600  | 2.02707700  |
| C | 0.69280900  | -3.69352800 | -0.91768700 |
| C | -0.52324900 | -3.52803500 | -1.50196500 |
| C | 0.77328200  | -4.24617700 | 0.42372600  |
| C | -1.74704000 | -3.87183900 | -0.83647200 |
| H | -0.58408200 | -3.10881300 | -2.50312500 |
| C | -0.41508600 | -4.62491100 | 1.10363500  |
| C | 2.01952500  | -4.43553000 | 1.06385700  |



|   |             |             |             |
|---|-------------|-------------|-------------|
| C | -2.98823700 | -3.68218300 | -1.48604600 |
| C | -1.71000500 | -4.41408500 | 0.46991700  |
| C | -0.30080500 | -5.20055400 | 2.38841700  |
| H | 2.92788300  | -4.14868000 | 0.54412500  |
| C | 2.09867700  | -4.98405400 | 2.32498800  |
| C | -4.16935800 | -4.01015400 | -0.86035400 |
| H | -2.98953700 | -3.26620700 | -2.49082100 |
| C | -2.93822100 | -4.72694100 | 1.09533000  |
| C | 0.92593900  | -5.37640800 | 2.99122800  |
| H | -1.19195400 | -5.50921500 | 2.92299800  |
| H | 3.06619100  | -5.11977100 | 2.79824400  |
| C | -4.13929900 | -4.52914500 | 0.44661600  |
| H | -5.11969200 | -3.85095600 | -1.36103600 |
| H | -2.95240700 | -5.11866300 | 2.10601200  |
| H | 0.98480000  | -5.81987500 | 3.98050700  |
| H | -5.06896400 | -4.77203700 | 0.95281400  |
| C | 2.83168100  | 3.14768300  | -0.34159100 |
| C | 2.34267800  | 3.58488200  | -1.53217300 |
| C | 2.21067800  | 3.59399400  | 0.89488900  |
| C | 1.21273200  | 4.46178200  | -1.62462000 |
| H | 2.81245800  | 3.25918100  | -2.45695900 |
| C | 1.07150300  | 4.44295600  | 0.84334500  |
| C | 2.70855700  | 3.19509800  | 2.15654700  |
| C | 0.76031800  | 4.90902000  | -2.88556400 |
| C | 0.54150200  | 4.86851100  | -0.44724300 |
| C | 0.49503200  | 4.87316500  | 2.06077700  |
| H | 3.53754500  | 2.49804800  | 2.19850100  |
| C | 2.14756100  | 3.66141100  | 3.32531000  |
| C | -0.34736800 | 5.71969100  | -2.98939900 |
| H | 1.30253800  | 4.59398400  | -3.77347200 |
| C | -0.61093700 | 5.67415400  | -0.58495100 |
| C | 1.02644600  | 4.50556500  | 3.27830900  |
| H | -0.37568500 | 5.51861700  | 2.04709700  |
| H | 2.55442600  | 3.35147900  | 4.28414500  |
| C | -1.04704100 | 6.08911400  | -1.82654100 |
| H | -0.69128000 | 6.05857700  | -3.96187200 |
| H | -1.17458700 | 5.97559900  | 0.29078200  |
| H | 0.56985200  | 4.85672400  | 4.19847600  |
| H | -1.93742600 | 6.70564600  | -1.90301500 |
| C | -3.34463000 | 3.35879900  | -2.86879000 |
| C | -3.98492400 | 3.30332100  | -1.64029800 |
| C | -3.35661400 | 2.70575300  | -0.53776700 |
| C | -2.05300400 | 2.18036200  | -0.70692900 |
| C | -1.41835000 | 2.22830400  | -1.96233300 |

|   |             |             |             |
|---|-------------|-------------|-------------|
| C | -2.06351800 | 2.81135600  | -3.03868500 |
| H | -5.03849400 | 2.95999600  | 0.82602200  |
| H | -3.84352800 | 3.82789000  | -3.71213500 |
| H | -4.97633200 | 3.73015400  | -1.51721200 |
| C | -4.00143800 | 2.64150300  | 0.75978000  |
| C | -1.39200200 | 1.57654800  | 0.42063900  |
| H | -0.43069000 | 1.78525800  | -2.06748900 |
| H | -1.57605400 | 2.85830200  | -4.00670400 |
| C | -1.94128200 | 1.83172200  | 1.74334000  |
| C | -3.34410600 | 2.23852100  | 1.86907900  |
| H | -0.31969900 | 1.42410500  | 0.32616100  |
| N | -1.26862600 | 1.71046300  | 2.85935200  |
| N | -0.00301600 | 1.37714600  | 2.86414500  |
| C | 0.59191400  | 1.16918800  | 4.10799000  |
| O | 0.10579700  | 1.44321400  | 5.17546200  |
| O | 1.78387300  | 0.60667800  | 3.90838600  |
| C | 2.53623500  | 0.35970800  | 5.09831200  |
| H | 2.00688200  | -0.34334500 | 5.74521100  |
| H | 3.48054800  | -0.06649100 | 4.76443600  |
| H | 2.70850600  | 1.29135400  | 5.64270300  |
| C | -3.97959200 | 2.20009100  | 3.22519000  |
| H | -3.92925800 | 1.18717600  | 3.63944600  |
| H | -3.44982300 | 2.85260200  | 3.92517500  |
| H | -5.02431700 | 2.51171300  | 3.16885900  |
| C | -5.83576200 | -0.90274600 | -0.37610200 |
| C | -5.09850700 | -0.49397500 | -1.50265800 |
| C | -3.71561400 | -0.31139700 | -1.37415700 |
| C | -3.12672900 | -0.58968600 | -0.14774100 |
| C | -3.85390500 | -1.06443500 | 0.95158900  |
| C | -5.23292200 | -1.19857000 | 0.84231400  |
| H | -6.91154400 | -1.02427300 | -0.46585100 |
| H | -3.10194600 | 0.00851200  | -2.20933500 |
| H | -5.82654400 | -1.55448300 | 1.67929300  |
| C | -1.61532200 | -1.11077900 | 1.46961000  |
| C | -0.44898600 | -1.43127900 | 2.15320700  |
| C | -0.58507100 | -2.02575800 | 3.40513500  |
| C | -1.84573500 | -2.29734300 | 3.94992400  |
| C | -3.00735100 | -1.99558800 | 3.24561500  |
| C | -2.88624800 | -1.40198700 | 1.99020500  |
| H | 0.53310900  | -1.21282200 | 1.74767300  |
| H | 0.30974100  | -2.29539300 | 3.95730100  |
| H | -1.91674700 | -2.76131200 | 4.92882400  |
| H | -3.98554900 | -2.23090200 | 3.65449400  |
| N | -1.75631700 | -0.45559000 | 0.20884400  |

|   |             |             |             |
|---|-------------|-------------|-------------|
| H | -1.00920000 | -0.60385700 | -0.50754000 |
| C | -5.82910500 | -0.28023400 | -2.83249000 |
| C | -4.86728800 | 0.08238200  | -3.96704500 |
| C | -6.56170500 | -1.57351300 | -3.22708300 |
| C | -6.85093100 | 0.85620100  | -2.67212500 |
| H | -4.34279500 | 1.02262300  | -3.77045400 |
| H | -4.11910500 | -0.70145400 | -4.12728400 |
| H | -5.43021200 | 0.19987800  | -4.89854900 |
| H | -7.29153200 | -1.87992900 | -2.47198400 |
| H | -7.09861400 | -1.42530100 | -4.17040900 |
| H | -5.85108700 | -2.39487000 | -3.36946100 |
| H | -7.38206500 | 1.02349500  | -3.61551900 |
| H | -7.59475700 | 0.62530400  | -1.90332100 |
| H | -6.34842800 | 1.78726000  | -2.39038400 |

**IMI-1**

|   |             |             |             |
|---|-------------|-------------|-------------|
| C | 4.77729200  | -1.08974900 | -0.82253300 |
| C | 5.97213100  | -1.05106000 | -0.09746600 |
| C | 6.36181800  | 0.10985900  | 0.55900700  |
| C | 5.55038700  | 1.24064400  | 0.47987100  |
| C | 4.32412500  | 1.21427400  | -0.19408000 |
| C | 3.94398800  | 0.01802600  | -0.81370300 |
| C | 5.52772500  | -3.32102900 | -0.66618000 |
| C | 6.64910900  | -2.40246200 | -0.14113400 |
| H | 7.28762600  | 0.14137900  | 1.12587500  |
| H | 5.85433500  | 2.16330400  | 0.96634800  |
| H | 4.90701600  | -3.66040200 | 0.17023800  |
| H | 7.50532400  | -2.38695100 | -0.82608800 |
| C | 4.67136300  | -2.39980000 | -1.57851800 |
| C | 3.33759000  | -3.01724100 | -1.95778200 |
| C | 5.33505000  | -2.27690900 | -2.98190600 |
| C | 3.45066300  | -3.70254300 | -3.17274700 |
| C | 2.11567400  | -3.00303700 | -1.30087700 |
| C | 4.82704600  | -3.50103300 | -3.76065800 |
| H | 6.42486500  | -2.21743200 | -2.91501200 |
| C | 2.37318100  | -4.40538100 | -3.69323600 |
| C | 1.01180400  | -3.71045100 | -1.79197700 |
| H | 4.80048900  | -3.33852600 | -4.84129600 |
| C | 1.16938600  | -4.41359500 | -2.99272200 |
| H | 2.45964300  | -4.93317200 | -4.63848200 |
| H | 0.31803700  | -4.96521000 | -3.38014100 |
| H | 7.02328200  | -2.71001000 | 0.83896800  |
| H | 5.89756400  | -4.20137600 | -1.19954100 |
| H | 4.97057900  | -1.36146500 | -3.46032000 |
| H | 5.45709500  | -4.37978600 | -3.57700300 |
| O | 1.98051300  | -2.24423800 | -0.13779500 |
| O | 2.65591500  | -0.09807100 | -1.35366800 |
| P | 1.58966600  | -0.68569800 | -0.29052700 |
| O | 1.63529600  | -0.05232200 | 1.04673500  |
| O | 0.26954800  | -0.58841500 | -1.11487700 |
| H | 0.65898400  | 0.86081000  | 2.56648500  |
| C | -0.31794700 | -3.72850900 | -1.11692300 |
| C | -1.39394600 | -3.23358300 | -1.78574300 |
| C | -0.50608900 | -4.37297100 | 0.16974300  |
| C | -2.73018500 | -3.35089900 | -1.28131200 |
| H | -1.25100600 | -2.74691400 | -2.74753100 |
| C | -1.81910700 | -4.52651200 | 0.69254700  |
| C | 0.58843100  | -4.89182400 | 0.89793400  |
| C | -3.81885200 | -2.85209700 | -2.03343100 |

|   |             |             |             |
|---|-------------|-------------|-------------|
| C | -2.96103800 | -4.01177200 | -0.05248300 |
| C | -1.97600500 | -5.20264400 | 1.92269700  |
| H | 1.59012000  | -4.78758600 | 0.49422200  |
| C | 0.40393600  | -5.53690800 | 2.10100800  |
| C | -5.11122700 | -3.02236400 | -1.59499300 |
| H | -3.61206800 | -2.34029300 | -2.96992500 |
| C | -4.29862700 | -4.15767200 | 0.38183300  |
| C | -0.89265200 | -5.69723200 | 2.61618200  |
| H | -2.96651800 | -5.33360400 | 2.34298300  |
| H | 1.25900200  | -5.92756000 | 2.64393900  |
| C | -5.34863500 | -3.68085500 | -0.37367000 |
| H | -5.94390900 | -2.63995300 | -2.17748500 |
| H | -4.51632200 | -4.65742100 | 1.31914600  |
| H | -1.04368000 | -6.20919100 | 3.56153700  |
| H | -6.36723000 | -3.81213600 | -0.02077000 |
| C | 3.48748100  | 2.44200100  | -0.32293000 |
| C | 3.33568500  | 2.98806100  | -1.55935900 |
| C | 2.89370600  | 3.09250900  | 0.82982000  |
| C | 2.62502100  | 4.21428200  | -1.77303900 |
| H | 3.78959800  | 2.50340300  | -2.42064800 |
| C | 2.15526000  | 4.29404800  | 0.65302700  |
| C | 3.03077500  | 2.55015700  | 2.12828700  |
| C | 2.53652800  | 4.76931600  | -3.06885200 |
| C | 2.02155900  | 4.87560500  | -0.67693500 |
| C | 1.57413000  | 4.89752700  | 1.79068300  |
| H | 3.55419100  | 1.60821200  | 2.25342300  |
| C | 2.48364400  | 3.18483200  | 3.22187400  |
| C | 1.85613100  | 5.94713900  | -3.28556800 |
| H | 3.01734900  | 4.24730300  | -3.89216500 |
| C | 1.32206000  | 6.07625100  | -0.92892400 |
| C | 1.73971700  | 4.36325100  | 3.05028000  |
| H | 0.98813300  | 5.80298400  | 1.68257800  |
| H | 2.61194800  | 2.76170900  | 4.21367900  |
| C | 1.24058300  | 6.60062400  | -2.20261500 |
| H | 1.79313900  | 6.36960400  | -4.28355700 |
| H | 0.83737700  | 6.60603300  | -0.11700800 |
| H | 1.28564100  | 4.84857700  | 3.90843500  |
| H | 0.69864100  | 7.52669500  | -2.36832200 |
| C | -1.73468100 | 4.40858400  | -2.26984900 |
| C | -2.58052500 | 4.36160400  | -1.16503300 |
| C | -2.37362800 | 3.42259300  | -0.14952400 |
| C | -1.29365400 | 2.52784100  | -0.25723800 |
| C | -0.43942300 | 2.59188300  | -1.35422900 |
| C | -0.66588200 | 3.52069600  | -2.36885800 |

|   |             |             |             |
|---|-------------|-------------|-------------|
| H | -4.17526400 | 3.94204000  | 0.98425600  |
| H | -1.90425500 | 5.14307000  | -3.05168700 |
| H | -3.40826100 | 5.06082900  | -1.07916200 |
| C | -3.25407500 | 3.36470400  | 1.01865600  |
| C | -1.10911900 | 1.47119100  | 0.80425900  |
| H | 0.40370600  | 1.90846300  | -1.42464600 |
| H | 0.00264000  | 3.56287400  | -3.22194200 |
| C | -1.64930800 | 1.94358300  | 2.14026900  |
| C | -2.92914200 | 2.67930300  | 2.13062400  |
| H | -0.04537800 | 1.25000300  | 0.87857500  |
| N | -1.09174500 | 1.76630300  | 3.28482700  |
| N | 0.10372700  | 1.15628200  | 3.37164900  |
| C | 0.63142800  | 0.93446000  | 4.61769800  |
| O | 0.15149000  | 1.26855400  | 5.67553400  |
| O | 1.79361800  | 0.27073500  | 4.47452000  |
| C | 2.46878400  | -0.01573600 | 5.69945500  |
| H | 1.85340500  | -0.65400400 | 6.33733900  |
| H | 3.38326600  | -0.53521000 | 5.41661800  |
| H | 2.70731900  | 0.90542700  | 6.23678200  |
| C | -3.76549100 | 2.66997100  | 3.37378300  |
| H | -4.02583200 | 1.64298100  | 3.65154000  |
| H | -3.20980300 | 3.09271500  | 4.21596500  |
| H | -4.68342700 | 3.24339900  | 3.22821700  |
| C | -5.75357100 | 0.31006700  | -0.87824000 |
| C | -4.79777600 | 0.84344200  | -1.76253600 |
| C | -3.44668300 | 0.80859100  | -1.39993300 |
| C | -3.09383700 | 0.24680700  | -0.17709000 |
| C | -4.04199700 | -0.36836900 | 0.64642200  |
| C | -5.39098900 | -0.31563900 | 0.30619400  |
| H | -6.80619900 | 0.35507700  | -1.14261300 |
| H | -2.68385900 | 1.21118400  | -2.05487700 |
| H | -6.14158900 | -0.77291800 | 0.94434600  |
| C | -1.95406800 | -0.76766500 | 1.51667700  |
| C | -0.97969900 | -1.36351900 | 2.30814500  |
| C | -1.40368300 | -2.17279700 | 3.36091800  |
| C | -2.76128000 | -2.40020500 | 3.60235200  |
| C | -3.72978400 | -1.84323200 | 2.77347400  |
| C | -3.31595100 | -1.02473000 | 1.72468700  |
| H | 0.07831800  | -1.21601800 | 2.12727000  |
| H | -0.65711800 | -2.64922700 | 3.98867000  |
| H | -3.05912600 | -3.03877200 | 4.42832000  |
| H | -4.78500000 | -2.04818900 | 2.92907600  |
| N | -1.76643900 | 0.13265100  | 0.39154000  |
| H | -0.59454400 | -0.40927600 | -0.56811200 |

|   |             |             |             |
|---|-------------|-------------|-------------|
| C | -5.26642200 | 1.46391200  | -3.08318200 |
| C | -4.09249300 | 1.87351000  | -3.97664400 |
| C | -6.12901400 | 0.45576300  | -3.85985100 |
| C | -6.10255400 | 2.71595500  | -2.77011700 |
| H | -3.47085200 | 2.63890300  | -3.50181800 |
| H | -3.45522900 | 1.01698600  | -4.22241700 |
| H | -4.47456200 | 2.28715900  | -4.91535000 |
| H | -7.01368500 | 0.14874900  | -3.29476100 |
| H | -6.47458500 | 0.90362400  | -4.79799000 |
| H | -5.55284500 | -0.44241700 | -4.10668600 |
| H | -6.44770600 | 3.18514000  | -3.69818900 |
| H | -6.98312300 | 2.47172000  | -2.16752000 |
| H | -5.50539200 | 3.44846100  | -2.21628000 |

**IMI-2**

|   |             |             |             |
|---|-------------|-------------|-------------|
| C | -4.93552400 | -1.77324400 | -0.10859800 |
| C | -5.69718000 | -2.52154300 | 0.79309200  |
| C | -5.17273300 | -3.67261300 | 1.36749500  |
| C | -3.87009700 | -4.05482100 | 1.05807400  |
| C | -3.05218700 | -3.28409300 | 0.21855900  |
| C | -3.62225500 | -2.14127100 | -0.35370500 |
| C | -6.81814000 | -0.45624400 | 0.42824200  |
| C | -7.04089300 | -1.86502600 | 1.01029700  |
| H | -5.76431400 | -4.26670200 | 2.05780100  |
| H | -3.45527400 | -4.95700800 | 1.49704700  |
| H | -6.37100600 | 0.19189600  | 1.18993400  |
| H | -7.82887000 | -2.40059500 | 0.46740500  |
| C | -5.78407900 | -0.67175900 | -0.71333200 |
| C | -5.20058800 | 0.63703900  | -1.21875100 |
| C | -6.51416200 | -1.16925500 | -1.99466000 |
| C | -5.96934700 | 1.11921400  | -2.28631800 |
| C | -4.11051200 | 1.38023300  | -0.79098900 |
| C | -7.02968700 | 0.11380600  | -2.66531100 |
| H | -7.30160000 | -1.89125100 | -1.76232400 |
| C | -5.68773600 | 2.34437800  | -2.87321300 |
| C | -3.80248400 | 2.62363200  | -1.35912600 |
| H | -7.14137200 | 0.01459200  | -3.74816300 |
| C | -4.61532400 | 3.09386600  | -2.39567900 |
| H | -6.28485900 | 2.71027200  | -3.70320100 |
| H | -4.38080900 | 4.05684500  | -2.83919600 |
| H | -7.32745400 | -1.84766400 | 2.06511700  |
| H | -7.73558500 | 0.01749300  | 0.06815400  |
| H | -5.78290700 | -1.65706900 | -2.64819200 |
| H | -8.00487800 | 0.41187300  | -2.26146600 |
| O | -3.26438700 | 0.86112900  | 0.19729100  |
| O | -2.83061500 | -1.28612300 | -1.13453500 |
| P | -2.09857200 | -0.14816200 | -0.27734900 |
| O | -1.31603000 | -0.60348500 | 0.88664000  |
| O | -1.32834700 | 0.55722300  | -1.46577000 |
| H | 0.46875300  | -0.82441100 | 1.89100200  |
| C | -2.62367000 | 3.42940600  | -0.92677100 |
| C | -1.61773900 | 3.65802700  | -1.81826100 |
| C | -2.58177400 | 4.05866500  | 0.38204400  |
| C | -0.46752000 | 4.45246500  | -1.48722200 |
| H | -1.66919800 | 3.21494800  | -2.81189000 |
| C | -1.49486100 | 4.90897700  | 0.71432000  |
| C | -3.62815700 | 3.88045400  | 1.31477700  |
| C | 0.58455600  | 4.60774700  | -2.41591100 |



|   |             |             |             |
|---|-------------|-------------|-------------|
| C | -0.38090400 | 5.05956200  | -0.21231300 |
| C | -1.52704300 | 5.58835200  | 1.95135800  |
| H | -4.45893700 | 3.22976200  | 1.06133900  |
| C | -3.61885900 | 4.53572400  | 2.52693100  |
| C | 1.71884800  | 5.31390100  | -2.08165100 |
| H | 0.48335000  | 4.15540700  | -3.39900500 |
| C | 0.79484000  | 5.77319900  | 0.10656800  |
| C | -2.56443500 | 5.40956800  | 2.84095200  |
| H | -0.72294300 | 6.26633900  | 2.21339200  |
| H | -4.43202500 | 4.38903800  | 3.23050500  |
| C | 1.82438400  | 5.89170000  | -0.80441000 |
| H | 2.52921500  | 5.41835800  | -2.79570400 |
| H | 0.91185500  | 6.22062900  | 1.08679500  |
| H | -2.56518300 | 5.94554800  | 3.78487700  |
| H | 2.72402000  | 6.43307300  | -0.52960200 |
| C | -1.65647700 | -3.70932700 | -0.07769400 |
| C | -1.23701600 | -3.81072100 | -1.36836800 |
| C | -0.76460600 | -4.11363300 | 0.99632700  |
| C | 0.02760700  | -4.39234100 | -1.71517800 |
| H | -1.88920300 | -3.49361400 | -2.17790300 |
| C | 0.44033400  | -4.79715500 | 0.68754600  |
| C | -1.06027400 | -3.82140600 | 2.34824700  |
| C | 0.43612500  | -4.45928800 | -3.06562500 |
| C | 0.84100000  | -4.95794500 | -0.70411700 |
| C | 1.23956500  | -5.26417000 | 1.75514500  |
| H | -1.93695900 | -3.22654500 | 2.58072600  |
| C | -0.23882200 | -4.25405800 | 3.36558900  |
| C | 1.61201500  | -5.08536600 | -3.41600400 |
| H | -0.19746800 | -4.00696000 | -3.82388800 |
| C | 2.02317500  | -5.62458700 | -1.09488800 |
| C | 0.90961400  | -5.00499200 | 3.06715700  |
| H | 2.14613100  | -5.82124600 | 1.54712800  |
| H | -0.47600500 | -4.00783000 | 4.39630400  |
| C | 2.40279000  | -5.68586900 | -2.41973000 |
| H | 1.92086600  | -5.12854600 | -4.45595100 |
| H | 2.65601800  | -6.09350900 | -0.34994500 |
| H | 1.55442200  | -5.35315000 | 3.86736000  |
| H | 3.31914100  | -6.20062600 | -2.69269700 |
| C | 2.18795100  | 0.17670000  | -4.47772500 |
| C | 2.69509000  | -0.95133800 | -3.84727100 |
| C | 2.63935800  | -1.08013500 | -2.45241100 |
| C | 2.04629900  | -0.05829000 | -1.69687900 |
| C | 1.57325300  | 1.08691700  | -2.33265900 |
| C | 1.63710100  | 1.20804000  | -3.71676800 |

|   |             |             |             |
|---|-------------|-------------|-------------|
| H | 3.86735900  | -2.88643400 | -2.40758400 |
| H | 2.23654500  | 0.26280700  | -5.55874800 |
| H | 3.15459700  | -1.74714100 | -4.42798500 |
| C | 3.28885000  | -2.20714500 | -1.78481900 |
| C | 1.90580500  | -0.18053400 | -0.18805700 |
| H | 1.17506500  | 1.90275000  | -1.73019800 |
| H | 1.26248600  | 2.10367300  | -4.20196300 |
| C | 2.42577100  | -1.50647500 | 0.37799100  |
| C | 3.26976600  | -2.38297000 | -0.44987000 |
| H | 0.83489100  | -0.10178400 | 0.02835800  |
| N | 2.20168700  | -1.91003500 | 1.57814700  |
| N | 1.30775600  | -1.20763600 | 2.32907700  |
| C | 1.21308900  | -1.51994500 | 3.66348900  |
| O | 2.03828200  | -2.11015200 | 4.32113700  |
| O | 0.06748000  | -1.00556000 | 4.14632700  |
| C | -0.08305000 | -1.11916200 | 5.55993100  |
| H | 0.71661200  | -0.58218500 | 6.07566500  |
| H | -1.04827200 | -0.67038900 | 5.79132400  |
| H | -0.06803600 | -2.16665200 | 5.86982100  |
| C | 4.07409500  | -3.43790900 | 0.24588100  |
| H | 4.80528700  | -2.96351700 | 0.91110400  |
| H | 3.43880200  | -4.06327400 | 0.87692000  |
| H | 4.60342800  | -4.06182200 | -0.47801400 |
| C | 6.46841700  | 2.23415500  | 0.57931000  |
| C | 6.20480200  | 1.09933300  | -0.22089800 |
| C | 4.90453500  | 0.61025300  | -0.29614100 |
| C | 3.89678200  | 1.25472000  | 0.42612400  |
| C | 4.16063400  | 2.38395400  | 1.22514200  |
| C | 5.46885600  | 2.87321200  | 1.29473200  |
| H | 7.48346700  | 2.61514600  | 0.64226800  |
| H | 4.67179700  | -0.25837000 | -0.89525600 |
| H | 5.70089100  | 3.74090600  | 1.90593100  |
| C | 1.93277600  | 1.84961900  | 1.35977200  |
| C | 0.60076400  | 1.93029000  | 1.77748200  |
| C | 0.26406100  | 2.93016800  | 2.67922900  |
| C | 1.21419500  | 3.85060700  | 3.14870100  |
| C | 2.53394300  | 3.77548300  | 2.72385400  |
| C | 2.90318500  | 2.76727500  | 1.82938100  |
| H | -0.15422000 | 1.22652700  | 1.44483200  |
| H | -0.76440900 | 2.99940900  | 3.02125400  |
| H | 0.91039900  | 4.62150200  | 3.85051600  |
| H | 3.27558600  | 4.48076000  | 3.08881000  |
| N | 2.54473100  | 0.94032900  | 0.50492400  |
| H | -0.99772900 | 1.44898200  | -1.25061900 |

|   |            |             |             |
|---|------------|-------------|-------------|
| C | 7.35520500 | 0.42858700  | -0.97837900 |
| C | 6.87759500 | -0.77057900 | -1.80489900 |
| C | 8.00509400 | 1.44497600  | -1.93130000 |
| C | 8.40590300 | -0.06539400 | 0.02965300  |
| H | 6.43049500 | -1.54584900 | -1.17243000 |
| H | 6.13778200 | -0.47406500 | -2.55695100 |
| H | 7.72956900 | -1.21599400 | -2.32852900 |
| H | 8.41765900 | 2.30134800  | -1.38955700 |
| H | 8.82464700 | 0.97203200  | -2.48379800 |
| H | 7.27550100 | 1.82188700  | -2.65532400 |
| H | 9.23581300 | -0.55035500 | -0.49631300 |
| H | 8.81750400 | 0.75951400  | 0.61891500  |
| H | 7.96850100 | -0.79083700 | 0.72333800  |

**IMI-3**

|   |             |             |             |
|---|-------------|-------------|-------------|
| C | 5.18058900  | 1.37089800  | -0.11813300 |
| C | 6.11928100  | 1.94892400  | 0.74137500  |
| C | 5.81756200  | 3.10762700  | 1.44603900  |
| C | 4.56050700  | 3.68646700  | 1.28330700  |
| C | 3.58816700  | 3.10364300  | 0.46275900  |
| C | 3.90759400  | 1.91903200  | -0.21694900 |
| C | 6.90661000  | -0.21475300 | 0.15867500  |
| C | 7.37956600  | 1.11510300  | 0.77320900  |
| H | 6.54397200  | 3.55420200  | 2.11876600  |
| H | 4.30963200  | 4.59945500  | 1.81673200  |
| H | 6.45387900  | -0.83738000 | 0.93837100  |
| H | 8.16680500  | 1.57717400  | 0.16455700  |
| C | 5.79688300  | 0.19490300  | -0.85253100 |
| C | 4.98863500  | -1.00630600 | -1.30881300 |
| C | 6.44499800  | 0.62686400  | -2.19894100 |
| C | 5.56979300  | -1.56948900 | -2.44910400 |
| C | 3.86655700  | -1.59808600 | -0.74273100 |
| C | 6.69635700  | -0.69444000 | -2.94847700 |
| H | 7.34996900  | 1.22280600  | -2.04839900 |
| C | 5.08485600  | -2.75978100 | -2.97456000 |
| C | 3.38403300  | -2.82562800 | -1.22447600 |
| H | 6.68261500  | -0.57598900 | -4.03545400 |
| C | 4.01502800  | -3.38886700 | -2.34101900 |
| H | 5.53275300  | -3.20094500 | -3.86032900 |
| H | 3.64661200  | -4.33892400 | -2.71674500 |
| H | 7.77847600  | 0.99846700  | 1.78451800  |
| H | 7.70797700  | -0.78823900 | -0.31622600 |
| H | 5.72245600  | 1.23350400  | -2.75546600 |
| H | 7.66910300  | -1.12492100 | -2.68064000 |
| O | 3.22061200  | -0.96205500 | 0.29655200  |
| O | 2.94553400  | 1.25393900  | -0.95116900 |
| P | 2.06263600  | 0.13750700  | -0.11069100 |
| O | 1.62791100  | 0.71854200  | 1.20350500  |
| O | 1.08331800  | -0.42189700 | -1.08583100 |
| H | 0.08643900  | 1.06874500  | 1.27730800  |
| C | 2.23782900  | -3.54812100 | -0.60317300 |
| C | 1.19149700  | -3.91976400 | -1.38976700 |
| C | 2.27301800  | -3.97956600 | 0.78637200  |
| C | 0.10892900  | -4.72395300 | -0.90278100 |
| H | 1.16293400  | -3.60057900 | -2.42885700 |
| C | 1.21353300  | -4.77012500 | 1.30697600  |
| C | 3.36560300  | -3.66711800 | 1.62810700  |
| C | -0.92928200 | -5.12647900 | -1.77211800 |

|   |             |             |             |
|---|-------------|-------------|-------------|
| C | 0.09282600  | -5.13668800 | 0.45092900  |
| C | 1.29375700  | -5.21023100 | 2.64761400  |
| H | 4.18813500  | -3.08167200 | 1.23411900  |
| C | 3.41294400  | -4.10279700 | 2.93379700  |
| C | -1.96945600 | -5.90559200 | -1.31528500 |
| H | -0.88953900 | -4.80896400 | -2.81097500 |
| C | -1.00438100 | -5.90347600 | 0.90137000  |
| C | 2.36589600  | -4.88385800 | 3.44913600  |
| H | 0.49982900  | -5.81928300 | 3.06419700  |
| H | 4.26347200  | -3.84805200 | 3.55811200  |
| C | -2.01223100 | -6.28210200 | 0.03884100  |
| H | -2.75558300 | -6.22482400 | -1.99284600 |
| H | -1.06758000 | -6.20837200 | 1.93948200  |
| H | 2.40144400  | -5.23482000 | 4.47579500  |
| H | -2.84027600 | -6.87883300 | 0.40862400  |
| C | 2.26837000  | 3.77562600  | 0.27785700  |
| C | 1.98831800  | 4.35196900  | -0.92230000 |
| C | 1.32059300  | 3.89717900  | 1.36896600  |
| C | 0.78396100  | 5.09592000  | -1.15075300 |
| H | 2.70340900  | 4.27323100  | -1.73773900 |
| C | 0.10555600  | 4.60795200  | 1.17729900  |
| C | 1.57985800  | 3.29834100  | 2.62359100  |
| C | 0.55006900  | 5.70474100  | -2.40497600 |
| C | -0.17588300 | 5.22086500  | -0.11618000 |
| C | -0.79663600 | 4.70461300  | 2.26288600  |
| H | 2.48258400  | 2.71084100  | 2.74257900  |
| C | 0.69025000  | 3.42177500  | 3.66571400  |
| C | -0.60975400 | 6.40614600  | -2.64391400 |
| H | 1.30511000  | 5.60038200  | -3.17990100 |
| C | -1.36413800 | 5.93833600  | -0.39263000 |
| C | -0.50502500 | 4.13889200  | 3.48439600  |
| H | -1.73477400 | 5.23397400  | 2.14453400  |
| H | 0.90100200  | 2.94879900  | 4.61965900  |
| C | -1.57660700 | 6.51763300  | -1.62641900 |
| H | -0.78025500 | 6.87110800  | -3.60989700 |
| H | -2.12663300 | 6.04599000  | 0.37035800  |
| H | -1.20819300 | 4.23911200  | 4.30566100  |
| H | -2.49537700 | 7.06535000  | -1.81159000 |
| C | -3.76118500 | -2.59715100 | -4.21774600 |
| C | -3.25490200 | -1.32115400 | -4.41161100 |
| C | -2.65181700 | -0.63596300 | -3.34712300 |
| C | -2.55364500 | -1.24066600 | -2.08730200 |
| C | -3.05856100 | -2.52301900 | -1.89934900 |
| C | -3.66146900 | -3.19439300 | -2.95990800 |

|   |             |             |             |
|---|-------------|-------------|-------------|
| H | -2.22727900 | 1.13272800  | -4.52501100 |
| H | -4.23620800 | -3.12564600 | -5.03745000 |
| H | -3.32571900 | -0.83608700 | -5.38099900 |
| C | -2.16708500 | 0.71381800  | -3.52224400 |
| C | -1.89306100 | -0.51645900 | -0.92959800 |
| H | -2.98831800 | -2.99403300 | -0.92286800 |
| H | -4.06001500 | -4.19122500 | -2.80023000 |
| C | -1.58235700 | 0.94691300  | -1.19906700 |
| C | -1.66022900 | 1.49366400  | -2.53496400 |
| H | -0.86703800 | -0.92492000 | -0.83853700 |
| N | -1.12762700 | 1.72810100  | -0.25224800 |
| N | -0.91315000 | 1.33709200  | 1.04601900  |
| C | -1.90289100 | 1.63266400  | 1.94716200  |
| O | -2.95156800 | 2.17813100  | 1.67431500  |
| O | -1.55163700 | 1.18438500  | 3.15538400  |
| C | -2.53660700 | 1.38216000  | 4.16824700  |
| H | -3.45147300 | 0.83620900  | 3.92251500  |
| H | -2.09775500 | 0.99191600  | 5.08579000  |
| H | -2.76957400 | 2.44401300  | 4.27828800  |
| C | -1.15566800 | 2.88157500  | -2.79665400 |
| H | -1.66771900 | 3.63487900  | -2.18475500 |
| H | -0.08342800 | 2.94155100  | -2.57982600 |
| H | -1.30567000 | 3.14580800  | -3.84443800 |
| C | -6.53767000 | -0.21364800 | 1.34872500  |
| C | -6.17523800 | 0.23044100  | 0.05648900  |
| C | -4.85719700 | 0.07657900  | -0.36326400 |
| C | -3.94595400 | -0.52418100 | 0.50527400  |
| C | -4.30401300 | -0.97647100 | 1.78914200  |
| C | -5.62616900 | -0.80534000 | 2.20975400  |
| H | -7.56444000 | -0.09145200 | 1.68038000  |
| H | -4.53105200 | 0.41331400  | -1.34144900 |
| H | -5.93879200 | -1.13518000 | 3.19670000  |
| C | -2.07266000 | -1.38984100 | 1.43031200  |
| C | -0.75751800 | -1.77646000 | 1.68549200  |
| C | -0.48212100 | -2.28791600 | 2.94601400  |
| C | -1.48857400 | -2.43316600 | 3.91604800  |
| C | -2.79875100 | -2.06121800 | 3.64437500  |
| C | -3.10093900 | -1.52541900 | 2.38869900  |
| H | 0.02636400  | -1.66719600 | 0.94000800  |
| H | 0.53836700  | -2.57359100 | 3.18177400  |
| H | -1.23327600 | -2.83753400 | 4.89066100  |
| H | -3.57484100 | -2.17106600 | 4.39692400  |
| N | -2.59678300 | -0.77325800 | 0.29926300  |
| C | -7.24322700 | 0.85176700  | -0.84927400 |

|   |             |             |             |
|---|-------------|-------------|-------------|
| C | -6.66897300 | 1.28938400  | -2.20023000 |
| C | -8.34851200 | -0.18539700 | -1.10879400 |
| C | -7.85417800 | 2.08264700  | -0.16037500 |
| H | -5.89025200 | 2.05059100  | -2.08221700 |
| H | -6.24314200 | 0.44392900  | -2.75178200 |
| H | -7.46653300 | 1.72112800  | -2.81322200 |
| H | -8.83221100 | -0.50083900 | -0.17958500 |
| H | -9.11929100 | 0.23873100  | -1.76201800 |
| H | -7.93883500 | -1.07642700 | -1.59580600 |
| H | -8.61758700 | 2.53313000  | -0.80432200 |
| H | -8.32969700 | 1.82071600  | 0.78938800  |
| H | -7.08795600 | 2.83757300  | 0.04260900  |
| H | -0.87857200 | 2.69323800  | -0.48025300 |

**TSI-2**Value of imaginary frequency = -1098.8 cm<sup>-1</sup>

|   |             |             |             |
|---|-------------|-------------|-------------|
| C | 3.77763500  | -3.34278400 | -0.11099400 |
| C | 4.30174300  | -4.28034000 | -1.00502200 |
| C | 3.46498900  | -5.16297300 | -1.67563500 |
| C | 2.09619100  | -5.10186800 | -1.43250400 |
| C | 1.54294800  | -4.14741900 | -0.56864400 |
| C | 2.40328400  | -3.24323300 | 0.06753800  |
| C | 6.03760200  | -2.75339000 | -0.45949500 |
| C | 5.80273300  | -4.13420800 | -1.09678400 |
| H | 3.86678600  | -5.89044500 | -2.37475500 |
| H | 1.42444800  | -5.79828100 | -1.92716300 |
| H | 5.91274600  | -1.97416600 | -1.21938100 |
| H | 6.30425300  | -4.92699200 | -0.52814100 |
| C | 4.89884100  | -2.60756900 | 0.59114200  |
| C | 4.76872500  | -1.17360600 | 1.06468800  |
| C | 5.30722000  | -3.31200800 | 1.91550400  |
| C | 5.59790700  | -0.96655100 | 2.17252300  |
| C | 4.04356200  | -0.11366800 | 0.53447500  |
| C | 6.18045800  | -2.27763400 | 2.64727400  |
| H | 5.81272800  | -4.26540000 | 1.73608200  |
| C | 5.77589300  | 0.30650300  | 2.69405100  |
| C | 4.25272300  | 1.19303300  | 1.00312000  |
| H | 6.13864000  | -2.37970700 | 3.73519200  |
| C | 5.12755300  | 1.37602500  | 2.08196700  |
| H | 6.41689700  | 0.47352200  | 3.55490000  |
| H | 5.28837900  | 2.38694700  | 2.44437800  |
| H | 6.16651100  | -4.19430600 | -2.12611400 |
| H | 7.02897500  | -2.63911500 | -0.01194000 |
| H | 4.40112800  | -3.50872000 | 2.49894800  |
| H | 7.23353300  | -2.36434900 | 2.35380000  |
| O | 3.10078900  | -0.36011500 | -0.45399100 |
| O | 1.90374500  | -2.21424900 | 0.85461400  |
| P | 1.60393800  | -0.80884200 | 0.05415600  |
| O | 0.75960000  | -1.04556000 | -1.14497200 |
| O | 1.17398800  | 0.15936100  | 1.14493100  |
| H | -1.15906100 | -0.79274500 | -1.46356300 |
| C | 3.62198300  | 2.40250800  | 0.40405400  |
| C | 2.91500700  | 3.24389300  | 1.20667000  |
| C | 3.88385900  | 2.78352100  | -0.97540100 |
| C | 2.42652900  | 4.51210100  | 0.74891700  |
| H | 2.71654600  | 2.96205500  | 2.23818400  |
| C | 3.41312600  | 4.03244800  | -1.46343100 |
| C | 4.62408900  | 1.94896900  | -1.84403400 |



|   |             |             |             |
|---|-------------|-------------|-------------|
| C | 1.74433800  | 5.37426700  | 1.63538000  |
| C | 2.65744100  | 4.91598300  | -0.58653000 |
| C | 3.70023100  | 4.38815900  | -2.80021900 |
| H | 5.00131200  | 1.00223700  | -1.47501100 |
| C | 4.88102000  | 2.31756100  | -3.14645300 |
| C | 1.27879500  | 6.59894800  | 1.21100800  |
| H | 1.59730700  | 5.04946100  | 2.66162800  |
| C | 2.15701800  | 6.17059400  | -1.00036000 |
| C | 4.41388800  | 3.55083300  | -3.62973200 |
| H | 3.34915000  | 5.33517900  | -3.19299600 |
| H | 5.44853700  | 1.65715600  | -3.79442800 |
| C | 1.48105500  | 6.99301600  | -0.12365200 |
| H | 0.76123000  | 7.25948500  | 1.90029000  |
| H | 2.30145700  | 6.50679300  | -2.02045700 |
| H | 4.61703800  | 3.84639200  | -4.65438000 |
| H | 1.10876300  | 7.95311300  | -0.46712600 |
| C | 0.07812400  | -4.19894400 | -0.29462500 |
| C | -0.34680000 | -4.67044100 | 0.90835600  |
| C | -0.88812400 | -3.91115800 | -1.33644600 |
| C | -1.73768000 | -4.86180500 | 1.20423400  |
| H | 0.38053100  | -4.92530100 | 1.67596100  |
| C | -2.27039400 | -4.12360600 | -1.09526800 |
| C | -0.47110200 | -3.43465300 | -2.60110600 |
| C | -2.13962300 | -5.32848000 | 2.47607700  |
| C | -2.71335300 | -4.55427500 | 0.22547200  |
| C | -3.17792300 | -3.92491500 | -2.16185900 |
| H | 0.57856600  | -3.21136200 | -2.75234100 |
| C | -1.37857500 | -3.23522200 | -3.61634200 |
| C | -3.47397500 | -5.45378700 | 2.79075000  |
| H | -1.37179500 | -5.56972500 | 3.20695700  |
| C | -4.07690900 | -4.66573600 | 0.58374300  |
| C | -2.74092800 | -3.50675100 | -3.39983200 |
| H | -4.23482700 | -4.11594300 | -2.01399900 |
| H | -1.04278500 | -2.86916400 | -4.58114400 |
| C | -4.44882800 | -5.10302500 | 1.83811200  |
| H | -3.77608500 | -5.80641200 | 3.77185400  |
| H | -4.84957100 | -4.39014100 | -0.12511900 |
| H | -3.45518600 | -3.37175700 | -4.20660300 |
| H | -5.50196200 | -5.17544700 | 2.09092900  |
| C | -1.15930100 | 3.93900300  | 4.43829400  |
| C | -1.24024000 | 2.57500000  | 4.64594900  |
| C | -1.29068300 | 1.69692800  | 3.54920900  |
| C | -1.23518000 | 2.19770600  | 2.23634500  |
| C | -1.14193800 | 3.57965100  | 2.03789700  |

|   |             |             |             |
|---|-------------|-------------|-------------|
| C | -1.11864700 | 4.43625400  | 3.12898000  |
| H | -1.46993200 | -0.09093900 | 4.75809600  |
| H | -1.13399500 | 4.62117500  | 5.28153000  |
| H | -1.28121700 | 2.16518200  | 5.65129900  |
| C | -1.46246300 | 0.28328200  | 3.73646800  |
| C | -1.23741200 | 1.25422900  | 1.08698600  |
| H | -1.09505000 | 3.97550900  | 1.02830500  |
| H | -1.06223700 | 5.50720900  | 2.95948300  |
| C | -1.67160600 | -0.11793600 | 1.36299600  |
| C | -1.64767500 | -0.60638300 | 2.72775800  |
| H | -0.02309500 | 0.83245800  | 1.02396300  |
| N | -1.89129400 | -1.02371000 | 0.41703700  |
| N | -2.02540200 | -0.74659500 | -0.91972200 |
| C | -3.29157200 | -0.87686800 | -1.43599700 |
| O | -4.26611900 | -1.18415800 | -0.78134600 |
| O | -3.28826100 | -0.59719300 | -2.73998800 |
| C | -4.57108100 | -0.68054900 | -3.36093300 |
| H | -5.24825000 | 0.06339200  | -2.93440500 |
| H | -4.39946300 | -0.47643700 | -4.41729500 |
| H | -4.99957700 | -1.67721700 | -3.23107800 |
| C | -1.83608700 | -2.07008000 | 2.99605100  |
| H | -2.78132700 | -2.45269100 | 2.59008300  |
| H | -1.01754200 | -2.64387600 | 2.54736100  |
| H | -1.83455900 | -2.26058900 | 4.07051200  |
| C | -5.53185800 | 2.46801400  | -1.43425100 |
| C | -5.38943300 | 2.00836200  | -0.10520200 |
| C | -4.10989400 | 1.82088400  | 0.40976400  |
| C | -3.01457300 | 2.05509100  | -0.42207100 |
| C | -3.15385100 | 2.47417900  | -1.75757900 |
| C | -4.43974800 | 2.69677200  | -2.25792800 |
| H | -6.52911300 | 2.62519900  | -1.83519000 |
| H | -3.95603200 | 1.46957100  | 1.42478200  |
| H | -4.58482500 | 3.02751200  | -3.28285400 |
| C | -0.93105700 | 2.13333900  | -1.28603400 |
| C | 0.44737900  | 2.07289800  | -1.49380200 |
| C | 0.91380500  | 2.33815600  | -2.77480400 |
| C | 0.04585600  | 2.70947000  | -3.81309900 |
| C | -1.31941700 | 2.81604100  | -3.58870900 |
| C | -1.81854000 | 2.51890800  | -2.31777700 |
| H | 1.13429700  | 1.82710000  | -0.69016800 |
| H | 1.97797000  | 2.25319100  | -2.97038200 |
| H | 0.45187400  | 2.91646600  | -4.79834400 |
| H | -1.99331600 | 3.11338900  | -4.38724200 |
| N | -1.66937400 | 1.86136100  | -0.13754300 |

|   |             |             |             |
|---|-------------|-------------|-------------|
| C | -6.64323300 | 1.65883800  | 0.70081600  |
| C | -6.30099900 | 1.16812400  | 2.11046800  |
| C | -7.55808000 | 2.88738100  | 0.81888200  |
| C | -7.38751500 | 0.53047000  | -0.03509600 |
| H | -5.69387000 | 0.25696600  | 2.08189400  |
| H | -5.75895800 | 1.92787800  | 2.68353500  |
| H | -7.22407400 | 0.93748900  | 2.65169000  |
| H | -7.87426900 | 3.25214900  | -0.16289700 |
| H | -8.46022000 | 2.63289500  | 1.38626100  |
| H | -7.04947000 | 3.70687900  | 1.33694500  |
| H | -8.25574300 | 0.20377500  | 0.54849400  |
| H | -7.74865900 | 0.86141700  | -1.01399900 |
| H | -6.72284500 | -0.32555600 | -0.19080900 |
| H | -2.04072900 | -1.99468200 | 0.68565900  |

**IMI-4**

|   |             |             |             |
|---|-------------|-------------|-------------|
| C | 5.36486300  | -1.49064000 | -0.46549200 |
| C | 6.06503300  | -2.24424500 | -1.41078100 |
| C | 5.61457000  | -3.50858500 | -1.77143400 |
| C | 4.44094600  | -4.00530600 | -1.20251000 |
| C | 3.67646400  | -3.23707700 | -0.31619600 |
| C | 4.16661900  | -1.97134900 | 0.03022200  |
| C | 6.93379900  | -0.02404800 | -1.43228900 |
| C | 7.24715900  | -1.45285600 | -1.92501300 |
| H | 6.15928300  | -4.10357000 | -2.49861300 |
| H | 4.08537400  | -4.99451500 | -1.47607700 |
| H | 6.28401700  | 0.48243500  | -2.15426200 |
| H | 8.18469200  | -1.82551100 | -1.49531900 |
| C | 6.14332400  | -0.23985600 | -0.11106000 |
| C | 5.47926600  | 1.02564000  | 0.41537600  |
| C | 7.13858000  | -0.53740000 | 1.04971600  |
| C | 6.33902000  | 1.67430000  | 1.31291300  |
| C | 4.23801000  | 1.59461200  | 0.15559900  |
| C | 7.57991300  | 0.84727600  | 1.54542800  |
| H | 7.96571900  | -1.17505800 | 0.72605500  |
| C | 5.99067800  | 2.88480500  | 1.89457100  |
| C | 3.86351100  | 2.82350400  | 0.71584800  |
| H | 7.89091100  | 0.84730900  | 2.59340100  |
| C | 4.76047600  | 3.45704000  | 1.58118700  |
| H | 6.66213100  | 3.37511600  | 2.59333500  |
| H | 4.47099000  | 4.40816000  | 2.01774900  |
| H | 7.34297600  | -1.51293500 | -3.01241400 |
| H | 7.82687100  | 0.58936500  | -1.28305400 |
| H | 6.59717600  | -1.05603000 | 1.84823900  |
| H | 8.41952700  | 1.23323800  | 0.95449200  |
| O | 3.32638300  | 0.93931400  | -0.67456100 |
| O | 3.38436100  | -1.11994100 | 0.80995700  |
| P | 2.37498300  | -0.21002700 | -0.06899500 |
| O | 1.65273100  | -0.91892500 | -1.14135000 |
| O | 1.50243800  | 0.45002700  | 1.05777400  |
| H | -0.37535400 | -1.22074700 | -0.96102000 |
| C | 2.54213500  | 3.45233700  | 0.43188800  |
| C | 1.64161300  | 3.59153900  | 1.43949600  |
| C | 2.23204500  | 3.96827100  | -0.88785600 |
| C | 0.36823700  | 4.22228500  | 1.24422800  |
| H | 1.87148200  | 3.19469400  | 2.42530700  |
| C | 0.98927300  | 4.61601200  | -1.11629500 |
| C | 3.15195700  | 3.84613800  | -1.95431000 |
| C | -0.54943800 | 4.31766900  | 2.31353100  |

|   |             |             |             |
|---|-------------|-------------|-------------|
| C | 0.02747100  | 4.73946100  | -0.02864500 |
| C | 0.71756800  | 5.10660100  | -2.41253800 |
| H | 4.10782700  | 3.36424600  | -1.77598000 |
| C | 2.85540300  | 4.32788200  | -3.21062200 |
| C | -1.77519700 | 4.91830600  | 2.13642100  |
| H | -0.26890900 | 3.90281000  | 3.27831800  |
| C | -1.24049900 | 5.34276100  | -0.18444300 |
| C | 1.62454300  | 4.96415800  | -3.44081400 |
| H | -0.22613900 | 5.59849600  | -2.61695200 |
| H | 3.57368000  | 4.21879500  | -4.01708300 |
| C | -2.11986100 | 5.43274400  | 0.87389000  |
| H | -2.48013600 | 4.98338700  | 2.95911300  |
| H | -1.54299800 | 5.74022100  | -1.14633200 |
| H | 1.38456800  | 5.34405400  | -4.42902800 |
| H | -3.09087200 | 5.89636800  | 0.72859700  |
| C | 2.39042700  | -3.70771300 | 0.27092400  |
| C | 2.25808600  | -3.71803300 | 1.62561700  |
| C | 1.27998800  | -4.13646600 | -0.56056000 |
| C | 1.04292700  | -4.10946500 | 2.27668400  |
| H | 3.09081400  | -3.40481000 | 2.25035100  |
| C | 0.07919400  | -4.58714300 | 0.05086900  |
| C | 1.35338200  | -4.09425900 | -1.97096800 |
| C | 0.94305500  | -4.07937400 | 3.68611200  |
| C | -0.06753400 | -4.51765500 | 1.49881900  |
| C | -0.95392800 | -5.08251800 | -0.77458400 |
| H | 2.23406500  | -3.67020000 | -2.43921800 |
| C | 0.31855100  | -4.55896300 | -2.75271400 |
| C | -0.23342700 | -4.42124200 | 4.31575800  |
| H | 1.81322800  | -3.77704300 | 4.26296400  |
| C | -1.27454300 | -4.82368700 | 2.16801200  |
| C | -0.83324000 | -5.08574200 | -2.14772800 |
| H | -1.85821500 | -5.47779700 | -0.32521700 |
| H | 0.39508800  | -4.51601400 | -3.83449600 |
| C | -1.35537400 | -4.77952100 | 3.54508900  |
| H | -0.30315700 | -4.39593400 | 5.39878200  |
| H | -2.16153200 | -5.07726100 | 1.59950700  |
| H | -1.64053900 | -5.47462900 | -2.76128400 |
| H | -2.29387100 | -5.01737700 | 4.03582800  |
| C | -5.05583000 | 3.56158200  | 3.05631000  |
| C | -4.18200900 | 2.74490200  | 3.72921500  |
| C | -3.34877100 | 1.83957900  | 3.02289900  |
| C | -3.42962000 | 1.76673000  | 1.60913800  |
| C | -4.31657000 | 2.64820600  | 0.93536800  |
| C | -5.10991800 | 3.51829500  | 1.64369100  |

|   |             |             |             |
|---|-------------|-------------|-------------|
| H | -2.34669000 | 1.08080500  | 4.77978000  |
| H | -5.69613700 | 4.24786400  | 3.60162800  |
| H | -4.11226200 | 2.77541300  | 4.81337200  |
| C | -2.42030900 | 1.00874500  | 3.69728500  |
| C | -2.62542900 | 0.80754600  | 0.90576900  |
| H | -4.35776800 | 2.63932900  | -0.14816400 |
| H | -5.78220900 | 4.18416700  | 1.11117400  |
| C | -1.73936700 | 0.00414200  | 1.60330700  |
| C | -1.61681500 | 0.12576900  | 3.02879200  |
| H | 0.60997400  | -0.03190100 | 1.07585100  |
| N | -0.81709200 | -0.93213200 | 1.02618500  |
| N | -1.06069100 | -1.43708800 | -0.24202200 |
| C | -2.19999800 | -2.14527200 | -0.47319000 |
| O | -2.97191600 | -2.50678400 | 0.39439000  |
| O | -2.34646700 | -2.35945700 | -1.78503100 |
| C | -3.52762500 | -3.07370800 | -2.14580100 |
| H | -4.41759300 | -2.51179800 | -1.85220100 |
| H | -3.48924700 | -3.18030900 | -3.22960900 |
| H | -3.54616900 | -4.05717200 | -1.66901000 |
| C | -0.64394300 | -0.74526700 | 3.78039300  |
| H | -0.91805400 | -1.80593700 | 3.71191200  |
| H | 0.38030400  | -0.64242000 | 3.40398100  |
| H | -0.64041200 | -0.47736000 | 4.83843200  |
| C | -6.14730400 | -0.45266300 | -2.66914300 |
| C | -6.25865600 | -0.56426600 | -1.26307700 |
| C | -5.17431200 | -0.20178300 | -0.46770800 |
| C | -4.01791700 | 0.27447800  | -1.08915000 |
| C | -3.90317000 | 0.38164900  | -2.48778100 |
| C | -4.99144800 | 0.00539700  | -3.28173200 |
| H | -6.99018700 | -0.73957300 | -3.29095100 |
| H | -5.20603300 | -0.28593400 | 0.61207000  |
| H | -4.93300300 | 0.07425000  | -4.36448900 |
| C | -1.95084000 | 1.08604600  | -1.50690700 |
| C | -0.64044700 | 1.55118000  | -1.39941100 |
| C | 0.04758500  | 1.79703200  | -2.58187100 |
| C | -0.55579600 | 1.61137300  | -3.83552300 |
| C | -1.86579400 | 1.16256300  | -3.93339200 |
| C | -2.57284700 | 0.88685000  | -2.76029100 |
| H | -0.17383800 | 1.71154900  | -0.43019300 |
| H | 1.07705700  | 2.14004900  | -2.53212400 |
| H | 0.01453200  | 1.82126500  | -4.73486300 |
| H | -2.33322900 | 1.01682700  | -4.90316200 |
| N | -2.83115500 | 0.70688400  | -0.49808500 |
| C | -7.56025400 | -1.09955000 | -0.65787900 |

|   |             |             |             |
|---|-------------|-------------|-------------|
| C | -7.51487800 | -1.12628800 | 0.87251400  |
| C | -8.73447700 | -0.20675000 | -1.09186900 |
| C | -7.79786300 | -2.53319400 | -1.16039600 |
| H | -6.72174000 | -1.78474700 | 1.24135800  |
| H | -7.35420400 | -0.12651600 | 1.28987400  |
| H | -8.46752000 | -1.50140500 | 1.25987200  |
| H | -8.85102800 | -0.18817100 | -2.17946500 |
| H | -9.67072100 | -0.58036600 | -0.66256900 |
| H | -8.58877100 | 0.82279700  | -0.74911200 |
| H | -8.72918400 | -2.93275900 | -0.74354300 |
| H | -7.87562700 | -2.57107200 | -2.25127200 |
| H | -6.97763800 | -3.19169600 | -0.85492200 |
| H | -0.66624700 | -1.71268600 | 1.66814900  |

**DII**

|   |             |             |             |
|---|-------------|-------------|-------------|
| C | -1.60931000 | -3.69677200 | 0.22930200  |
| C | -1.65631300 | -4.65031500 | 1.25135300  |
| C | -0.53258100 | -4.91813600 | 2.02271100  |
| C | 0.63950200  | -4.20364400 | 1.78466100  |
| C | 0.70220900  | -3.20362700 | 0.80682000  |
| C | -0.44581700 | -2.96714900 | 0.03821000  |
| C | -3.88819600 | -4.19571900 | 0.58761800  |
| C | -3.04806000 | -5.22719000 | 1.36095000  |
| H | -0.56768900 | -5.66198400 | 2.81346700  |
| H | 1.52550400  | -4.40042200 | 2.38188000  |
| H | -4.15036700 | -3.36420100 | 1.25143200  |
| H | -3.09809100 | -6.21563500 | 0.88801700  |
| C | -2.93033700 | -3.66154700 | -0.51800900 |
| C | -3.47513900 | -2.39580100 | -1.15473500 |
| C | -2.94678100 | -4.62002800 | -1.74199700 |
| C | -4.28444900 | -2.71851500 | -2.25008900 |
| C | -3.32899700 | -1.06543400 | -0.79474000 |
| C | -4.19155100 | -4.19815000 | -2.54579600 |
| H | -2.95687200 | -5.67167000 | -1.44203500 |
| C | -5.00090300 | -1.73223500 | -2.91558100 |
| C | -4.06330100 | -0.04968800 | -1.42285900 |
| H | -4.09424700 | -4.40248100 | -3.61541100 |
| C | -4.90507200 | -0.41068100 | -2.48013600 |
| H | -5.62606100 | -1.98261100 | -3.76768000 |
| H | -5.47459700 | 0.37016600  | -2.97539500 |
| H | -3.36974100 | -5.34609700 | 2.39899600  |
| H | -4.81231500 | -4.60631500 | 0.17121600  |
| H | -2.04495000 | -4.44058400 | -2.33726700 |
| H | -5.08892100 | -4.72222100 | -2.19533800 |
| O | -2.40338500 | -0.72128100 | 0.18740900  |
| O | -0.44820800 | -1.92964900 | -0.89082000 |
| P | -0.89095400 | -0.47385900 | -0.33292700 |
| O | -0.18416900 | -0.30154300 | 1.04749900  |
| O | -0.69776100 | 0.54107100  | -1.38254900 |
| H | 0.48686700  | 0.43584300  | 1.18292900  |
| C | -3.91968700 | 1.37330900  | -1.00835700 |
| C | -3.51571500 | 2.29326000  | -1.92355500 |
| C | -4.21091100 | 1.79286300  | 0.35261800  |
| C | -3.33054100 | 3.67551300  | -1.58875500 |
| H | -3.28064700 | 1.97639800  | -2.93657900 |
| C | -4.02504200 | 3.15004700  | 0.72527300  |
| C | -4.69544600 | 0.87924400  | 1.31633300  |
| C | -2.89202300 | 4.59285600  | -2.56896800 |



|   |             |             |             |
|---|-------------|-------------|-------------|
| C | -3.56837800 | 4.11659600  | -0.26568400 |
| C | -4.30209800 | 3.52627200  | 2.05880700  |
| H | -4.86735300 | -0.15281300 | 1.02888400  |
| C | -4.96167300 | 1.27514500  | 2.60805000  |
| C | -2.69330400 | 5.91871700  | -2.25494800 |
| H | -2.70916200 | 4.22853300  | -3.57637800 |
| C | -3.35413100 | 5.48110400  | 0.02957500  |
| C | -4.75456900 | 2.61188000  | 2.98497700  |
| H | -4.16297500 | 4.55510900  | 2.37019600  |
| H | -5.33458100 | 0.55579400  | 3.33036000  |
| C | -2.92771100 | 6.36267300  | -0.94186000 |
| H | -2.35326000 | 6.61705600  | -3.01311900 |
| H | -3.52114000 | 5.85711200  | 1.03236500  |
| H | -4.96087400 | 2.92897100  | 4.00265400  |
| H | -2.76912200 | 7.40616800  | -0.68794300 |
| C | 1.96425700  | -2.44393400 | 0.57721200  |
| C | 2.55521400  | -2.49260700 | -0.64746900 |
| C | 2.60279900  | -1.69940500 | 1.64987900  |
| C | 3.84034500  | -1.91053600 | -0.90086100 |
| H | 2.06732700  | -3.02694400 | -1.45904800 |
| C | 3.88232300  | -1.12060500 | 1.44023800  |
| C | 1.95523500  | -1.49868500 | 2.89278600  |
| C | 4.43071100  | -2.01961900 | -2.17913200 |
| C | 4.53373900  | -1.25529800 | 0.14429200  |
| C | 4.47209300  | -0.38919700 | 2.49669200  |
| H | 0.95808400  | -1.90159300 | 3.03504700  |
| C | 2.55610800  | -0.77953600 | 3.90408800  |
| C | 5.68739000  | -1.51048600 | -2.41856700 |
| H | 3.87509000  | -2.51775400 | -2.96902200 |
| C | 5.82405500  | -0.74903300 | -0.12714900 |
| C | 3.82896300  | -0.22025500 | 3.70434200  |
| H | 5.44788500  | 0.06344500  | 2.36059200  |
| H | 2.03839200  | -0.63168200 | 4.84741800  |
| C | 6.39040400  | -0.87726900 | -1.37825100 |
| H | 6.13522100  | -1.59735800 | -3.40356400 |
| H | 6.38870000  | -0.24682800 | 0.65054600  |
| H | 4.29934000  | 0.35927500  | 4.49232600  |
| H | 7.38225100  | -0.47503800 | -1.56216500 |
| C | 4.24960100  | 1.01690900  | -4.59874400 |
| C | 4.94575400  | 1.62754000  | -3.58497700 |
| C | 4.37552300  | 1.74495800  | -2.29101300 |
| C | 3.07068900  | 1.21955900  | -2.07030800 |
| C | 2.37080600  | 0.59012000  | -3.13641400 |
| C | 2.95229200  | 0.49019700  | -4.37421700 |

|   |             |            |             |
|---|-------------|------------|-------------|
| H | 6.06009600  | 2.76187700 | -1.39570600 |
| H | 4.69495100  | 0.93161000 | -5.58542600 |
| H | 5.94139200  | 2.02779400 | -3.75699400 |
| C | 5.06291900  | 2.36724700 | -1.21492800 |
| C | 2.49777500  | 1.33469800 | -0.78749300 |
| H | 1.37346300  | 0.20249400 | -2.94062600 |
| H | 2.42181300  | 0.00974300 | -5.19012100 |
| C | 3.19831200  | 1.93604000 | 0.23995300  |
| C | 4.50983800  | 2.47423700 | 0.03632000  |
| H | 1.48205300  | 0.98218600 | -0.64605700 |
| N | 2.69292700  | 2.10798600 | 1.54070400  |
| N | 1.60936300  | 1.56431700 | 1.82573600  |
| C | 1.20928700  | 1.88391000 | 3.18775500  |
| O | 1.85313900  | 2.48883000 | 4.00066300  |
| O | -0.00727000 | 1.39157800 | 3.35451600  |
| C | -0.60247100 | 1.64489400 | 4.63134700  |
| H | -0.65845700 | 2.72026100 | 4.81310500  |
| H | -1.60062800 | 1.21454300 | 4.57918500  |
| H | -0.01735200 | 1.17043900 | 5.42254500  |
| C | 5.24935900  | 3.12671000 | 1.17193600  |
| H | 4.70625900  | 3.99878200 | 1.54748300  |
| H | 5.36221700  | 2.44067000 | 2.01657200  |
| H | 6.24003400  | 3.44730600 | 0.84270300  |

**DII<sub>R2</sub>**

|   |             |             |             |
|---|-------------|-------------|-------------|
| C | 4.22773700  | -1.51392200 | -0.11015900 |
| C | 5.23610000  | -1.69978700 | 0.84125100  |
| C | 5.73347500  | -0.62448300 | 1.56669000  |
| C | 5.19671300  | 0.64356800  | 1.35588000  |
| C | 4.14981900  | 0.85392900  | 0.45020100  |
| C | 3.68412500  | -0.24965000 | -0.27598800 |
| C | 4.38388700  | -3.83827000 | 0.26698800  |
| C | 5.59149600  | -3.16427200 | 0.94199500  |
| H | 6.51796500  | -0.76858700 | 2.30354700  |
| H | 5.57004900  | 1.49259500  | 1.92172200  |
| H | 3.57603300  | -3.95879300 | 0.99707900  |
| H | 6.52051900  | -3.37572200 | 0.39896100  |
| C | 3.92510700  | -2.82151600 | -0.81926700 |
| C | 2.54294700  | -3.16763600 | -1.34480400 |
| C | 4.77173700  | -3.01199400 | -2.10900900 |
| C | 2.65131900  | -4.04110900 | -2.43415200 |
| C | 1.28061200  | -2.81072700 | -0.89845800 |
| C | 4.10044700  | -4.19269100 | -2.83580900 |
| H | 5.82824200  | -3.18209800 | -1.88414800 |
| C | 1.51840500  | -4.60160300 | -3.00811900 |
| C | 0.11811300  | -3.37877900 | -1.43444700 |
| H | 4.23694900  | -4.15668300 | -3.91978200 |
| C | 0.26329100  | -4.28729200 | -2.48711900 |
| H | 1.60295900  | -5.27603200 | -3.85515700 |
| H | -0.63140500 | -4.73369100 | -2.91052600 |
| H | 5.73704000  | -3.48790200 | 1.97577100  |
| H | 4.61048400  | -4.81961500 | -0.15864000 |
| H | 4.69084500  | -2.10743400 | -2.72126700 |
| H | 4.50077600  | -5.15265300 | -2.48839300 |
| O | 1.15156800  | -1.80027700 | 0.06594500  |
| O | 2.60534200  | -0.09063400 | -1.15010000 |
| P | 1.12808600  | -0.31931600 | -0.55885300 |
| O | 1.03066400  | 0.47319200  | 0.80825400  |
| O | 0.12758100  | -0.03313200 | -1.60042200 |
| H | 0.75379800  | 1.40114200  | 0.71395100  |
| C | -1.23273100 | -3.02569200 | -0.91349900 |
| C | -2.12773800 | -2.40474900 | -1.72665100 |
| C | -1.62342200 | -3.40131600 | 0.43496800  |
| C | -3.44310300 | -2.04321000 | -1.28090200 |
| H | -1.83487900 | -2.13177900 | -2.73795600 |
| C | -2.93328900 | -3.10006500 | 0.89223300  |
| C | -0.74143700 | -4.09874800 | 1.29136400  |
| C | -4.31511200 | -1.33280300 | -2.13395000 |

|   |             |             |             |
|---|-------------|-------------|-------------|
| C | -3.84473700 | -2.34885100 | 0.03971400  |
| C | -3.31894800 | -3.55704900 | 2.17142800  |
| H | 0.25910000  | -4.33572100 | 0.94324600  |
| C | -1.13502100 | -4.50077800 | 2.55003300  |
| C | -5.54261300 | -0.90043600 | -1.68526200 |
| H | -3.98580900 | -1.10225600 | -3.14400400 |
| C | -5.10028200 | -1.87706400 | 0.48390200  |
| C | -2.44139200 | -4.23664100 | 2.98989700  |
| H | -4.33099800 | -3.38462100 | 2.51984100  |
| H | -0.44088800 | -5.03491000 | 3.19123100  |
| C | -5.92927900 | -1.16626200 | -0.35861400 |
| H | -6.19468100 | -0.33114700 | -2.34080700 |
| H | -5.41555500 | -2.04540000 | 1.50784100  |
| H | -2.76601000 | -4.57146500 | 3.97021600  |
| H | -6.88097500 | -0.79671600 | 0.01078600  |
| C | 3.55237500  | 2.20693000  | 0.26342800  |
| C | 3.60078100  | 2.79696300  | -0.96090000 |
| C | 2.91877300  | 2.90268300  | 1.37274300  |
| C | 3.07436700  | 4.10931100  | -1.19995100 |
| H | 4.06192300  | 2.27249300  | -1.79418100 |
| C | 2.39099100  | 4.20717100  | 1.17484300  |
| C | 2.76817300  | 2.28668000  | 2.63805900  |
| C | 3.15697200  | 4.68557200  | -2.48672700 |
| C | 2.47517000  | 4.83062300  | -0.14017200 |
| C | 1.77197300  | 4.85536400  | 2.26754900  |
| H | 3.12984100  | 1.27403300  | 2.77726000  |
| C | 2.14951200  | 2.94003300  | 3.68129500  |
| C | 2.65880600  | 5.94621900  | -2.72673900 |
| H | 3.62240900  | 4.11284200  | -3.28428100 |
| C | 1.97145700  | 6.12103500  | -0.41430100 |
| C | 1.65573200  | 4.24179200  | 3.49588700  |
| H | 1.36845100  | 5.85364000  | 2.14442500  |
| H | 2.03665900  | 2.44553900  | 4.64099300  |
| C | 2.05992600  | 6.66671600  | -1.67800900 |
| H | 2.72540100  | 6.38266200  | -3.71815900 |
| H | 1.50052900  | 6.70151100  | 0.37056000  |
| H | 1.16938600  | 4.76106600  | 4.31555900  |
| H | 1.66243800  | 7.65986400  | -1.86210400 |
| C | -5.44673200 | 3.26340600  | -3.34172600 |
| C | -4.39052600 | 2.77270400  | -4.12870100 |
| C | -3.34730800 | 2.04588300  | -3.57118800 |
| C | -3.38114700 | 1.81513900  | -2.19281400 |
| C | -4.43920700 | 2.30226100  | -1.38518400 |
| C | -5.47617500 | 3.03327900  | -1.97271500 |

|   |             |             |             |
|---|-------------|-------------|-------------|
| H | -6.24631400 | 3.82619100  | -3.81280400 |
| H | -2.53255200 | 1.66718800  | -4.18073000 |
| H | -6.29507500 | 3.41019000  | -1.36602400 |
| C | -2.95319800 | 1.12210400  | -0.10075800 |
| C | -2.38100100 | 0.53243100  | 1.03282400  |
| C | -2.99962100 | 0.71564900  | 2.26658200  |
| C | -4.20643800 | 1.45326200  | 2.32791800  |
| C | -4.78769700 | 2.01180100  | 1.20156800  |
| C | -4.15550700 | 1.85994300  | -0.03632300 |
| H | -1.47648300 | -0.05970500 | 0.93858000  |
| H | -4.68910300 | 1.59860900  | 3.28984600  |
| H | -5.71712200 | 2.56919600  | 1.28292200  |
| N | -2.50039300 | 1.11440800  | -1.40219100 |
| H | -1.63894000 | 0.66595900  | -1.70128200 |
| H | -4.38946800 | 2.96594900  | -5.19726400 |
| C | -2.37977500 | 0.19040500  | 3.56673800  |
| C | -1.16278200 | -0.70238100 | 3.30351400  |
| C | -1.92593900 | 1.39447400  | 4.41095500  |
| C | -3.41370900 | -0.61725700 | 4.36643500  |
| H | -1.41160700 | -1.54403200 | 2.64850400  |
| H | -0.34203700 | -0.14410400 | 2.84166000  |
| H | -0.79576500 | -1.11177300 | 4.25069700  |
| H | -2.76865500 | 2.04352500  | 4.67004900  |
| H | -1.46390700 | 1.05115800  | 5.34389500  |
| H | -1.19042700 | 1.99591900  | 3.86615200  |
| H | -2.95971600 | -0.99950200 | 5.28768700  |
| H | -4.27971000 | -0.01283400 | 4.65127700  |
| H | -3.77032000 | -1.47218500 | 3.78519100  |

**COMII**

|   |             |             |             |
|---|-------------|-------------|-------------|
| C | 2.09889000  | 4.24099800  | 0.07847800  |
| C | 2.36745900  | 5.18591500  | 1.07370200  |
| C | 1.36574800  | 5.59766300  | 1.94378100  |
| C | 0.09052200  | 5.04973500  | 1.81826500  |
| C | -0.19244200 | 4.05541500  | 0.87308900  |
| C | 0.84637800  | 3.64841500  | 0.02335400  |
| C | 4.44381500  | 4.50002200  | 0.13680900  |
| C | 3.82170400  | 5.59614900  | 1.02294300  |
| H | 1.56786300  | 6.33731400  | 2.71275100  |
| H | -0.70826100 | 5.38267800  | 2.47468000  |
| H | 4.70353200  | 3.63132100  | 0.75183000  |
| H | 3.92999000  | 6.58678800  | 0.56531300  |
| C | 3.30062700  | 4.09609200  | -0.83649000 |
| C | 3.61206000  | 2.81371000  | -1.58456300 |
| C | 3.23489500  | 5.10334400  | -2.02181600 |
| C | 4.25588100  | 3.10261900  | -2.79380900 |
| C | 3.39285600  | 1.48998500  | -1.23757700 |
| C | 4.28993500  | 4.59593200  | -3.02074600 |
| H | 3.39990400  | 6.13362400  | -1.69490900 |
| C | 4.72325600  | 2.08166600  | -3.60999800 |
| C | 3.87534500  | 0.43720500  | -2.02490500 |
| H | 4.06089200  | 4.86583000  | -4.05498000 |
| C | 4.54868400  | 0.75777300  | -3.20784400 |
| H | 5.21643500  | 2.30630300  | -4.55110400 |
| H | 4.92540500  | -0.05361400 | -3.82315100 |
| H | 4.27444300  | 5.64595700  | 2.01679100  |
| H | 5.34171800  | 4.82468000  | -0.39609300 |
| H | 2.24030500  | 5.04315200  | -2.47629400 |
| H | 5.28314300  | 4.99960400  | -2.79007200 |
| O | 2.63229000  | 1.19975200  | -0.10229700 |
| O | 0.63668600  | 2.59862700  | -0.87024800 |
| P | 1.04176300  | 1.11091500  | -0.37228800 |
| O | 0.53123300  | 0.96986900  | 1.09250800  |
| O | 0.61624300  | 0.14307700  | -1.40138600 |
| H | -0.26822400 | 0.38535100  | 1.32383600  |
| C | 3.70962400  | -0.98965000 | -1.62469900 |
| C | 2.89463400  | -1.80696400 | -2.34114400 |
| C | 4.48292300  | -1.52872300 | -0.52111600 |
| C | 2.75794000  | -3.20307400 | -2.03900500 |
| H | 2.31101500  | -1.39826600 | -3.16196400 |
| C | 4.41696300  | -2.91710500 | -0.22818000 |
| C | 5.31868300  | -0.69899000 | 0.26169400  |
| C | 1.86173100  | -4.00665800 | -2.77775900 |

|   |             |             |             |
|---|-------------|-------------|-------------|
| C | 3.52149300  | -3.77505300 | -0.99313700 |
| C | 5.22177200  | -3.41942300 | 0.81963400  |
| H | 5.36975600  | 0.36155700  | 0.03789700  |
| C | 6.06984900  | -1.21383000 | 1.29507400  |
| C | 1.71336300  | -5.34462700 | -2.49066300 |
| H | 1.27919600  | -3.54356700 | -3.56993100 |
| C | 3.35979000  | -5.15394900 | -0.72863700 |
| C | 6.02701900  | -2.59046300 | 1.57059800  |
| H | 5.20722800  | -4.47852700 | 1.05014900  |
| H | 6.70044200  | -0.55849000 | 1.88738900  |
| C | 2.47386000  | -5.91998700 | -1.45714300 |
| H | 1.01167600  | -5.95119000 | -3.05388700 |
| H | 3.92838400  | -5.62911600 | 0.06295900  |
| H | 6.62828000  | -3.00440300 | 2.37400900  |
| H | 2.36132000  | -6.97459000 | -1.22648700 |
| C | -1.57158500 | 3.51006700  | 0.71932600  |
| C | -2.20169600 | 3.66552600  | -0.47755000 |
| C | -2.27996800 | 2.88440100  | 1.82275500  |
| C | -3.55251000 | 3.24154100  | -0.69707700 |
| H | -1.67734100 | 4.14206400  | -1.30263400 |
| C | -3.62215200 | 2.45125800  | 1.64171200  |
| C | -1.66396800 | 2.68928800  | 3.08146800  |
| C | -4.15748900 | 3.41944700  | -1.96085400 |
| C | -4.27058500 | 2.61583700  | 0.34840100  |
| C | -4.29134000 | 1.85130800  | 2.73167000  |
| H | -0.62651400 | 2.97940000  | 3.21043200  |
| C | -2.35684800 | 2.13400100  | 4.13644200  |
| C | -5.43671600 | 2.96988300  | -2.19752500 |
| H | -3.58476100 | 3.90069900  | -2.74888600 |
| C | -5.58022200 | 2.15879400  | 0.07798700  |
| C | -3.68026200 | 1.70260800  | 3.95800000  |
| H | -5.31208700 | 1.50655300  | 2.61427800  |
| H | -1.87328500 | 2.00830300  | 5.10058400  |
| C | -6.14880400 | 2.32945900  | -1.16668400 |
| H | -5.89164900 | 3.09688300  | -3.17472800 |
| H | -6.15377300 | 1.65344400  | 0.84639700  |
| H | -4.21749500 | 1.24128800  | 4.78021100  |
| H | -7.15235800 | 1.95961300  | -1.35331200 |
| C | -4.10990700 | 0.30760900  | -4.35807700 |
| C | -4.80333800 | -0.36265400 | -3.38131800 |
| C | -4.27024500 | -0.47853300 | -2.07053800 |
| C | -3.02556300 | 0.14858800  | -1.78349900 |
| C | -2.32915100 | 0.84315000  | -2.81127300 |
| C | -2.85554700 | 0.90833500  | -4.07552100 |

|   |             |             |             |
|---|-------------|-------------|-------------|
| H | -5.86054900 | -1.71745400 | -1.29121600 |
| H | -4.51971100 | 0.37737300  | -5.36120800 |
| H | -5.75691100 | -0.83508200 | -3.60171900 |
| C | -4.92234100 | -1.22295800 | -1.05226800 |
| C | -2.49988700 | 0.04548200  | -0.48088000 |
| H | -1.37232500 | 1.29903300  | -2.56833700 |
| H | -2.32070100 | 1.42724800  | -4.86473600 |
| C | -3.14011600 | -0.70984800 | 0.48173000  |
| C | -4.37925100 | -1.37031500 | 0.20009300  |
| H | -1.59929700 | 0.59483400  | -0.24078400 |
| N | -2.67385500 | -0.85740200 | 1.80081500  |
| N | -1.54391200 | -0.40879000 | 2.07558200  |
| C | -1.24242600 | -0.57011500 | 3.49077700  |
| O | -1.92219700 | -1.12994900 | 4.30573600  |
| O | -0.08566800 | 0.04738700  | 3.69552100  |
| C | 0.35791600  | 0.24798800  | 5.04081200  |
| H | -0.31007200 | -0.24267800 | 5.74884600  |
| H | 1.36650300  | -0.15875700 | 5.12297400  |
| H | 0.38413800  | 1.32498500  | 5.21956600  |
| C | -5.02814500 | -2.23232200 | 1.24501200  |
| H | -4.35525600 | -3.04506000 | 1.53901400  |
| H | -5.24967600 | -1.66346200 | 2.15261300  |
| H | -5.95440200 | -2.66474200 | 0.86073100  |
| C | -4.09305700 | -4.38614400 | -2.44518800 |
| C | -3.47936000 | -3.57334500 | -3.41420900 |
| C | -2.31665800 | -2.86643200 | -3.13900700 |
| C | -1.77214000 | -2.98877900 | -1.85810700 |
| C | -2.37847000 | -3.80400700 | -0.86905300 |
| C | -3.54833900 | -4.50655600 | -1.17285200 |
| H | -4.99953900 | -4.92711400 | -2.69781700 |
| H | -1.85474200 | -2.22386900 | -3.88293100 |
| H | -4.02151800 | -5.13723300 | -0.42487700 |
| C | -0.48022800 | -2.82984900 | -0.02828800 |
| C | 0.55710000  | -2.54132700 | 0.86562800  |
| C | 0.51346500  | -3.10690200 | 2.14167200  |
| C | -0.59501500 | -3.90866000 | 2.50238700  |
| C | -1.61267300 | -4.20548100 | 1.60971700  |
| C | -1.55203100 | -3.68562900 | 0.31328800  |
| H | 1.39006100  | -1.92360700 | 0.53925100  |
| H | -0.64344700 | -4.32983000 | 3.50036000  |
| H | -2.43549000 | -4.84825600 | 1.91116800  |
| N | -0.63374000 | -2.41724700 | -1.33472000 |
| H | -0.11618700 | -1.63727200 | -1.72802300 |
| H | -3.92796300 | -3.48827800 | -4.39962700 |



|   |            |             |            |
|---|------------|-------------|------------|
| C | 1.69966200 | -2.98773500 | 3.10517600 |
| C | 2.53930200 | -1.73359600 | 2.82268300 |
| C | 1.23333600 | -2.98434700 | 4.57107700 |
| C | 2.58638700 | -4.22801000 | 2.89319900 |
| H | 3.03271400 | -1.79023600 | 1.84763800 |
| H | 1.92998900 | -0.82467800 | 2.83705500 |
| H | 3.32965800 | -1.64142900 | 3.57555300 |
| H | 0.91449700 | -3.97999400 | 4.89369900 |
| H | 2.05883200 | -2.68561100 | 5.22594900 |
| H | 0.39274200 | -2.30598800 | 4.73599500 |
| H | 3.47578700 | -4.17958200 | 3.53333400 |
| H | 2.03657100 | -5.14428600 | 3.13290900 |
| H | 2.91016800 | -4.29038900 | 1.85083600 |

**TSII-1**Value of imaginary frequency = -296.4 cm<sup>-1</sup>

|   |             |             |             |
|---|-------------|-------------|-------------|
| C | 0.97752700  | 4.59850600  | 0.03374200  |
| C | 0.98068600  | 5.50813700  | 1.09514500  |
| C | -0.17622200 | 5.73891700  | 1.82877300  |
| C | -1.33436000 | 5.03188100  | 1.50681700  |
| C | -1.34399200 | 4.06320600  | 0.49677300  |
| C | -0.16051200 | 3.85137900  | -0.22625600 |
| C | 3.23642300  | 5.12994000  | 0.44335000  |
| C | 2.36416100  | 6.09150400  | 1.27392600  |
| H | -0.18200100 | 6.45122100  | 2.64885700  |
| H | -2.24889100 | 5.20771300  | 2.06667300  |
| H | 3.51265100  | 4.26237500  | 1.05245100  |
| H | 2.41111400  | 7.11380700  | 0.87874900  |
| C | 2.30051200  | 4.65158400  | -0.70366200 |
| C | 2.88680200  | 3.47245600  | -1.46604800 |
| C | 2.26443500  | 5.72456000  | -1.82940100 |
| C | 3.66805400  | 3.94325700  | -2.52667100 |
| C | 2.80983600  | 2.10117900  | -1.22628300 |
| C | 3.51675300  | 5.43911300  | -2.67397800 |
| H | 2.22639700  | 6.74114900  | -1.42782300 |
| C | 4.43646600  | 3.07279000  | -3.28893100 |
| C | 3.59582700  | 1.20617500  | -1.96597000 |
| H | 3.40597800  | 5.74514700  | -3.71798600 |
| C | 4.41271900  | 1.71583800  | -2.98286700 |
| H | 5.04436500  | 3.44036000  | -4.11063100 |
| H | 5.02055700  | 1.01883100  | -3.55300200 |
| H | 2.66344800  | 6.13566000  | 2.32469000  |
| H | 4.15391700  | 5.58883000  | 0.06372700  |
| H | 1.36683400  | 5.56156200  | -2.43600400 |
| H | 4.39560500  | 5.95998600  | -2.27461000 |
| O | 1.97340200  | 1.63174300  | -0.23146300 |
| O | -0.08920300 | 2.83323800  | -1.16183100 |
| P | 0.37872500  | 1.38267900  | -0.55251100 |
| O | -0.23535100 | 1.15738200  | 0.79638400  |
| O | 0.17438900  | 0.39115800  | -1.65761600 |
| H | -0.89881100 | -0.01329800 | 1.93442200  |
| C | 3.61999000  | -0.26794700 | -1.71511100 |
| C | 2.69988500  | -1.07756400 | -2.29848400 |
| C | 4.72402000  | -0.85282300 | -0.97319100 |
| C | 2.75357900  | -2.50598300 | -2.16970400 |
| H | 1.88868500  | -0.64212500 | -2.87218600 |
| C | 4.84951900  | -2.26553400 | -0.88508000 |
| C | 5.70300700  | -0.03720500 | -0.36061900 |

|   |             |             |             |
|---|-------------|-------------|-------------|
| C | 1.75020900  | -3.30522500 | -2.75602600 |
| C | 3.81270500  | -3.11577200 | -1.45587900 |
| C | 5.99200300  | -2.80065900 | -0.25043300 |
| H | 5.58893800  | 1.04135700  | -0.40700800 |
| C | 6.79386400  | -0.58870100 | 0.27740600  |
| C | 1.76515200  | -4.67593400 | -2.61652000 |
| H | 0.95290800  | -2.81454300 | -3.30955400 |
| C | 3.80513700  | -4.52131300 | -1.32512100 |
| C | 6.94929000  | -1.98395700 | 0.31467400  |
| H | 6.12969700  | -3.87510200 | -0.20382800 |
| H | 7.53601600  | 0.05539700  | 0.73867000  |
| C | 2.80116200  | -5.28460800 | -1.88709000 |
| H | 0.97237500  | -5.27886000 | -3.05121100 |
| H | 4.58576100  | -5.02012300 | -0.76169200 |
| H | 7.81844000  | -2.42291400 | 0.79454500  |
| H | 2.81231400  | -6.36296200 | -1.76137300 |
| C | -2.57753400 | 3.29120800  | 0.17244300  |
| C | -3.11978500 | 3.40877700  | -1.06920900 |
| C | -3.22252200 | 2.43800300  | 1.15736400  |
| C | -4.32603400 | 2.73206800  | -1.44894900 |
| H | -2.64050800 | 4.04828400  | -1.80657700 |
| C | -4.40133400 | 1.72460400  | 0.80760900  |
| C | -2.69140900 | 2.28724600  | 2.45888500  |
| C | -4.87237300 | 2.91813100  | -2.73802400 |
| C | -4.97181400 | 1.87576400  | -0.52550000 |
| C | -4.99072000 | 0.87980200  | 1.77532800  |
| H | -1.76455500 | 2.78989400  | 2.71123200  |
| C | -3.31338300 | 1.48779800  | 3.39299600  |
| C | -6.02563100 | 2.26650900  | -3.11588100 |
| H | -4.36277300 | 3.58610100  | -3.42763000 |
| C | -6.14328400 | 1.20761600  | -0.94411300 |
| C | -4.46660600 | 0.76637800  | 3.04554200  |
| H | -5.87627800 | 0.30653800  | 1.52632700  |
| H | -2.89674600 | 1.39294200  | 4.39227400  |
| C | -6.65920200 | 1.39850200  | -2.20960500 |
| H | -6.44129400 | 2.41533300  | -4.10770400 |
| H | -6.65675600 | 0.52942200  | -0.27216400 |
| H | -4.93882800 | 0.11195400  | 3.77168100  |
| H | -7.56093800 | 0.87073000  | -2.50503900 |
| C | -4.80169900 | -1.33735100 | -3.26689800 |
| C | -4.97228700 | -2.22083900 | -2.21196900 |
| C | -4.12023200 | -2.17110200 | -1.09831500 |
| C | -3.10397000 | -1.18723800 | -1.07028200 |
| C | -2.94852600 | -0.28719500 | -2.14144300 |

|   |             |             |             |
|---|-------------|-------------|-------------|
| C | -3.78611100 | -0.37006800 | -3.23917000 |
| H | -4.98382400 | -3.90629600 | -0.09925300 |
| H | -5.46509600 | -1.39208200 | -4.12529700 |
| H | -5.75827200 | -2.97004600 | -2.24549000 |
| C | -4.24540000 | -3.11450500 | -0.00172300 |
| C | -2.18421500 | -1.15828700 | 0.03796800  |
| H | -2.14622800 | 0.44596400  | -2.09953900 |
| H | -3.66717700 | 0.31891700  | -4.06812700 |
| C | -2.52069700 | -1.93228800 | 1.22528500  |
| C | -3.48983500 | -3.02909100 | 1.11514500  |
| H | -1.61506700 | -0.24075000 | 0.16583000  |
| N | -2.05093500 | -1.68972500 | 2.42103600  |
| N | -1.24051500 | -0.68423200 | 2.65024300  |
| C | -0.93043400 | -0.40468000 | 3.97776600  |
| O | -1.27413500 | -1.04669400 | 4.93850400  |
| O | -0.19311600 | 0.70810700  | 4.00270000  |
| C | 0.17581400  | 1.17131900  | 5.30397700  |
| H | 0.68767200  | 0.38809200  | 5.86603200  |
| H | 0.84143800  | 2.01602800  | 5.13423500  |
| H | -0.71140000 | 1.49242400  | 5.85585200  |
| C | -3.61224300 | -3.99192500 | 2.25674300  |
| H | -2.64794600 | -4.47343800 | 2.45210000  |
| H | -3.90021400 | -3.47583300 | 3.17717200  |
| H | -4.35397700 | -4.76074000 | 2.03214600  |
| C | -1.95423100 | -5.91657400 | -1.78279800 |
| C | -2.22955600 | -4.85829100 | -2.65186700 |
| C | -1.77532900 | -3.56406600 | -2.38450300 |
| C | -1.04530600 | -3.37811800 | -1.22153300 |
| C | -0.72070400 | -4.44033700 | -0.35981600 |
| C | -1.18586700 | -5.72024000 | -0.63440900 |
| H | -2.32505400 | -6.90960200 | -2.01616100 |
| H | -1.98598400 | -2.74294700 | -3.06264600 |
| H | -0.94290300 | -6.55153100 | 0.02026200  |
| C | 0.33230700  | -2.53780200 | 0.38715900  |
| C | 1.20693000  | -1.72834700 | 1.10318100  |
| C | 1.92589800  | -2.29631500 | 2.15577200  |
| C | 1.75264300  | -3.66646500 | 2.43998000  |
| C | 0.89323400  | -4.47311900 | 1.70818300  |
| C | 0.17232500  | -3.90020100 | 0.66077300  |
| H | 1.30960900  | -0.67713300 | 0.86860200  |
| H | 2.31396400  | -4.11186500 | 3.25645900  |
| H | 0.79382600  | -5.52939700 | 1.93909100  |
| N | -0.54093900 | -2.16090000 | -0.67933300 |
| H | -0.22165000 | -1.38547800 | -1.28937200 |

|   |             |             |             |
|---|-------------|-------------|-------------|
| H | -2.80762000 | -5.03935500 | -3.55254000 |
| C | 2.87881800  | -1.46306000 | 3.01798700  |
| C | 2.86585600  | 0.01433700  | 2.61316800  |
| C | 2.46208700  | -1.58901300 | 4.49264300  |
| C | 4.31079000  | -1.99002000 | 2.85031000  |
| H | 3.22251500  | 0.14704700  | 1.58565300  |
| H | 1.86600400  | 0.45597600  | 2.68441900  |
| H | 3.53491800  | 0.57694200  | 3.27328200  |
| H | 2.59804500  | -2.60850300 | 4.86644300  |
| H | 3.07269600  | -0.92394400 | 5.11353000  |
| H | 1.40933100  | -1.32715100 | 4.63357900  |
| H | 4.99794900  | -1.43213300 | 3.49706200  |
| H | 4.38807500  | -3.05148500 | 3.10829800  |
| H | 4.63832100  | -1.86431300 | 1.81581700  |

**IMII-1**

|   |             |             |             |
|---|-------------|-------------|-------------|
| C | -0.95746100 | 4.49290300  | 0.03243900  |
| C | -1.33915100 | 5.33573800  | 1.08017000  |
| C | -2.49969300 | 5.07991900  | 1.79974600  |
| C | -3.28410600 | 3.98059800  | 1.45345100  |
| C | -2.89805500 | 3.09370500  | 0.44165200  |
| C | -1.69988800 | 3.35526700  | -0.23196400 |
| C | 0.88162300  | 5.90997700  | 0.43684800  |
| C | -0.31320000 | 6.43216700  | 1.25982600  |
| H | -2.79965900 | 5.72665000  | 2.61895500  |
| H | -4.21102900 | 3.78626900  | 1.98565300  |
| H | 1.49229200  | 5.24296200  | 1.05506900  |
| H | -0.68693100 | 7.38274400  | 0.86029800  |
| C | 0.23073600  | 5.07440100  | -0.70144700 |
| C | 1.24080100  | 4.21848500  | -1.44542800 |
| C | -0.24592400 | 6.01425100  | -1.84683600 |
| C | 1.74068900  | 4.92387300  | -2.54542800 |
| C | 1.74364800  | 2.95225800  | -1.16501500 |
| C | 1.00106700  | 6.22890900  | -2.71761200 |
| H | -0.67992500 | 6.94079600  | -1.46128000 |
| C | 2.77153100  | 4.40408400  | -3.31618900 |
| C | 2.81195900  | 2.42190000  | -1.89527200 |
| H | 0.76021600  | 6.43749000  | -3.76343500 |
| C | 3.31320100  | 3.17139400  | -2.96741400 |
| H | 3.15480200  | 4.94981500  | -4.17344500 |
| H | 4.14219500  | 2.75893300  | -3.53496900 |
| H | -0.06304500 | 6.59852600  | 2.31100300  |
| H | 1.52519700  | 6.70492600  | 0.04943700  |
| H | -1.01364400 | 5.49197600  | -2.42782800 |
| H | 1.60777500  | 7.06523500  | -2.34964700 |
| O | 1.18413200  | 2.21204700  | -0.12263600 |
| O | -1.17623500 | 2.39860300  | -1.11346400 |
| P | -0.17427200 | 1.37592400  | -0.36429200 |
| O | -0.67122000 | 0.89256300  | 0.94380400  |
| O | 0.08081400  | 0.32831200  | -1.49521400 |
| H | -1.07720700 | -0.53726800 | 2.23997000  |
| C | 3.51912500  | 1.14667300  | -1.56324300 |
| C | 3.22855300  | -0.00256800 | -2.22444100 |
| C | 4.67671100  | 1.20205500  | -0.68508500 |
| C | 4.05479000  | -1.17340900 | -2.11200800 |
| H | 2.37635500  | -0.03815400 | -2.89843500 |
| C | 5.53896100  | 0.07890800  | -0.57960200 |
| C | 4.99073800  | 2.38046800  | 0.03047600  |
| C | 3.74369900  | -2.33366100 | -2.85197500 |

|   |             |             |             |
|---|-------------|-------------|-------------|
| C | 5.21905200  | -1.14419500 | -1.30543800 |
| C | 6.70405300  | 0.19916500  | 0.20992600  |
| H | 4.32500800  | 3.23490800  | -0.04407700 |
| C | 6.12740000  | 2.46287500  | 0.80644400  |
| C | 4.56081500  | -3.44185200 | -2.80324300 |
| H | 2.84457500  | -2.33931400 | -3.46341500 |
| C | 6.02616200  | -2.30098100 | -1.25587200 |
| C | 6.99867600  | 1.36493400  | 0.88536800  |
| H | 7.39051300  | -0.63560300 | 0.29298700  |
| H | 6.35097500  | 3.37659300  | 1.34802300  |
| C | 5.70762800  | -3.42485600 | -1.99137500 |
| H | 4.31359000  | -4.32573500 | -3.38258400 |
| H | 6.91579700  | -2.32045700 | -0.63688300 |
| H | 7.90229600  | 1.42809500  | 1.48355900  |
| H | 6.35001300  | -4.29897200 | -1.94408600 |
| C | -3.79601100 | 1.97722500  | 0.03226900  |
| C | -4.31472700 | 1.99990000  | -1.22571200 |
| C | -4.20923300 | 0.94239000  | 0.96209600  |
| C | -5.32019600 | 1.07273800  | -1.65508100 |
| H | -4.00182000 | 2.77300500  | -1.92373000 |
| C | -5.21522000 | 0.01545200  | 0.57686600  |
| C | -3.61443000 | 0.82683800  | 2.23983900  |
| C | -5.85125600 | 1.15205800  | -2.96199600 |
| C | -5.80589800 | 0.09652800  | -0.75287200 |
| C | -5.60130500 | -0.97888600 | 1.50234900  |
| H | -2.81292100 | 1.50595700  | 2.51256800  |
| C | -4.01750700 | -0.15303800 | 3.12191900  |
| C | -6.84173500 | 0.28768700  | -3.37346800 |
| H | -5.46434700 | 1.91174700  | -3.63590600 |
| C | -6.82535700 | -0.77303900 | -1.19891800 |
| C | -5.02253100 | -1.06035300 | 2.75059800  |
| H | -6.36039700 | -1.70354800 | 1.23184700  |
| H | -3.55223900 | -0.22686900 | 4.10048600  |
| C | -7.33123500 | -0.68194300 | -2.47922100 |
| H | -7.24618100 | 0.35543200  | -4.37848500 |
| H | -7.22164200 | -1.53420100 | -0.53667000 |
| H | -5.33635100 | -1.83645700 | 3.44150200  |
| H | -8.11387600 | -1.36359400 | -2.79762400 |
| C | -4.30589300 | -3.32915000 | -2.56588600 |
| C | -3.72926600 | -4.25815700 | -1.70417000 |
| C | -2.76634000 | -3.86014200 | -0.77307000 |
| C | -2.38524700 | -2.50752400 | -0.72784000 |
| C | -2.97923500 | -1.57707500 | -1.57313000 |
| C | -3.93820000 | -1.98660600 | -2.49911900 |

|   |             |             |             |
|---|-------------|-------------|-------------|
| H | -2.33677200 | -5.87849100 | -0.03560600 |
| H | -5.05392700 | -3.65071400 | -3.28442800 |
| H | -4.02250200 | -5.30365400 | -1.75014100 |
| C | -2.14250100 | -4.82247600 | 0.13822300  |
| C | -1.25150300 | -2.10686700 | 0.17814700  |
| H | -2.67959200 | -0.53091200 | -1.51856800 |
| H | -4.40460900 | -1.25732000 | -3.15482100 |
| C | -1.22131800 | -2.98737500 | 1.41341800  |
| C | -1.40916800 | -4.43718900 | 1.19939700  |
| H | -1.38189100 | -1.06016400 | 0.45066100  |
| N | -1.08061400 | -2.60027400 | 2.63027000  |
| N | -0.99588600 | -1.28885600 | 2.92792000  |
| C | -0.90692600 | -0.93201800 | 4.24880900  |
| O | -0.78376900 | -1.67740500 | 5.19299900  |
| O | -0.96934100 | 0.41114300  | 4.33187800  |
| C | -0.72442100 | 0.93919900  | 5.63601000  |
| H | 0.25939000  | 0.62778600  | 5.99638900  |
| H | -0.76101900 | 2.02192200  | 5.52604100  |
| H | -1.49004100 | 0.60271400  | 6.33859500  |
| C | -0.84873800 | -5.38761600 | 2.21333500  |
| H | 0.23091100  | -5.24227400 | 2.32366900  |
| H | -1.29386200 | -5.20519500 | 3.19594800  |
| H | -1.04257000 | -6.42271100 | 1.92418900  |
| C | 1.07974400  | -5.41394500 | -3.06395300 |
| C | -0.01776400 | -4.63005800 | -3.43492100 |
| C | -0.41868300 | -3.53463400 | -2.67261700 |
| C | 0.29387700  | -3.25200800 | -1.50972600 |
| C | 1.43543000  | -3.99412500 | -1.16846200 |
| C | 1.82494600  | -5.09017900 | -1.93563000 |
| H | 1.36433100  | -6.26494200 | -3.67474000 |
| H | -1.26186700 | -2.93110700 | -2.98634800 |
| H | 2.70586100  | -5.66397500 | -1.66367100 |
| C | 1.24707900  | -2.23512100 | 0.29291800  |
| C | 1.59557300  | -1.33674400 | 1.29084000  |
| C | 2.76062000  | -1.55928100 | 2.02933300  |
| C | 3.55398300  | -2.67997800 | 1.71942800  |
| C | 3.22065200  | -3.55704000 | 0.69472900  |
| C | 2.04888000  | -3.33385300 | -0.02573800 |
| H | 0.97554000  | -0.47465000 | 1.49021400  |
| H | 4.46097900  | -2.86791700 | 2.28621700  |
| H | 3.86772100  | -4.39521100 | 0.45334000  |
| N | 0.09100200  | -2.17152900 | -0.57124900 |
| H | 0.13829000  | -0.65679700 | -1.20313300 |
| H | -0.57085100 | -4.87145400 | -4.33707200 |



|   |            |             |            |
|---|------------|-------------|------------|
| C | 3.14272000 | -0.63204900 | 3.18759400 |
| C | 2.30907000 | 0.65431500  | 3.18907000 |
| C | 2.90091300 | -1.38502700 | 4.50649900 |
| C | 4.61733700 | -0.22078800 | 3.08103900 |
| H | 2.42663100 | 1.20577200  | 2.24943700 |
| H | 1.24210400 | 0.46350400  | 3.33702700 |
| H | 2.64412000 | 1.30226700  | 4.00612500 |
| H | 3.51906400 | -2.28705600 | 4.56690100 |
| H | 3.15036900 | -0.74469400 | 5.36071500 |
| H | 1.85216700 | -1.68986200 | 4.59900300 |
| H | 4.88413900 | 0.43158100  | 3.92032100 |
| H | 5.29830700 | -1.07672500 | 3.10074500 |
| H | 4.78797200 | 0.33145900  | 2.15310000 |

**IMII-2**

|   |             |             |             |
|---|-------------|-------------|-------------|
| C | -4.10713200 | 1.88388600  | 1.30134800  |
| C | -4.57067500 | 1.69873800  | 2.60693300  |
| C | -4.97668400 | 0.44221300  | 3.04035900  |
| C | -4.89144000 | -0.63915900 | 2.16642000  |
| C | -4.36945000 | -0.49856500 | 0.87362200  |
| C | -3.97625700 | 0.78321600  | 0.46986700  |
| C | -3.58196800 | 3.85468200  | 2.48171200  |
| C | -4.50350700 | 3.00010300  | 3.37197700  |
| H | -5.34813100 | 0.29864700  | 4.05109900  |
| H | -5.21059000 | -1.62500400 | 2.49200100  |
| H | -2.53452800 | 3.63478500  | 2.71801100  |
| H | -5.49893900 | 3.45050900  | 3.46513000  |
| C | -3.87721700 | 3.35943900  | 1.03623600  |
| C | -2.85044200 | 3.87482600  | 0.04247900  |
| C | -5.16205900 | 4.04990300  | 0.49464900  |
| C | -3.27154900 | 5.10362300  | -0.48126200 |
| C | -1.62471300 | 3.36309800  | -0.35319400 |
| C | -4.67534500 | 5.41554200  | -0.01986500 |
| H | -5.94302500 | 4.12154000  | 1.25641800  |
| C | -2.44542500 | 5.83776100  | -1.32077300 |
| C | -0.75253600 | 4.09006900  | -1.17637600 |
| H | -5.29883400 | 5.81384600  | -0.82466500 |
| C | -1.18540500 | 5.33725400  | -1.64155100 |
| H | -2.77411600 | 6.79100600  | -1.72413300 |
| H | -0.51741600 | 5.91087300  | -2.27702900 |
| H | -4.11274300 | 2.86876300  | 4.38500300  |
| H | -3.74103300 | 4.93092600  | 2.59193800  |
| H | -5.55072900 | 3.45846200  | -0.34143200 |
| H | -4.66245700 | 6.16273500  | 0.78292300  |
| O | -1.25322500 | 2.07961000  | 0.05668200  |
| O | -3.37851600 | 0.95956500  | -0.78332700 |
| P | -1.77832400 | 0.81817600  | -0.78981700 |
| O | -1.20755800 | -0.42586100 | -0.24151700 |
| O | -1.49915800 | 1.13588900  | -2.31374100 |
| H | -0.18840000 | -0.62753700 | 1.36071000  |
| C | 0.57641500  | 3.55873000  | -1.58747600 |
| C | 0.86632100  | 3.46495400  | -2.91384500 |
| C | 1.57905600  | 3.18103000  | -0.60489600 |
| C | 2.12708500  | 2.97307800  | -3.39042600 |
| H | 0.11468200  | 3.74604400  | -3.64827500 |
| C | 2.82990600  | 2.66445200  | -1.03901700 |
| C | 1.34767700  | 3.33851900  | 0.78043500  |
| C | 2.37650700  | 2.87930300  | -4.77744700 |

|   |             |             |             |
|---|-------------|-------------|-------------|
| C | 3.10872000  | 2.54264900  | -2.46513800 |
| C | 3.77725200  | 2.28513400  | -0.06229500 |
| H | 0.40752400  | 3.76306400  | 1.11616900  |
| C | 2.29548200  | 2.97172900  | 1.70966100  |
| C | 3.56338500  | 2.35893300  | -5.24449600 |
| H | 1.61061400  | 3.22192800  | -5.46863700 |
| C | 4.30816700  | 1.99580600  | -2.97041000 |
| C | 3.51919100  | 2.42966800  | 1.28422200  |
| H | 4.73151300  | 1.86908400  | -0.36698300 |
| H | 2.09430300  | 3.10154600  | 2.76820100  |
| C | 4.53072800  | 1.90791800  | -4.32950500 |
| H | 3.74984000  | 2.28940800  | -6.31158200 |
| H | 5.06737000  | 1.61727600  | -2.29334100 |
| H | 4.26305400  | 2.11565700  | 2.01168200  |
| H | 5.46077600  | 1.48007900  | -4.69120000 |
| C | -4.27129500 | -1.66183100 | -0.05242300 |
| C | -4.92703900 | -1.61730600 | -1.24302200 |
| C | -3.50934900 | -2.84446200 | 0.30680700  |
| C | -4.92930700 | -2.72305700 | -2.15539400 |
| H | -5.49047800 | -0.72865900 | -1.51693300 |
| C | -3.49542500 | -3.96307600 | -0.56764500 |
| C | -2.75665600 | -2.89760200 | 1.50091400  |
| C | -5.63717500 | -2.63910000 | -3.37488200 |
| C | -4.22750900 | -3.90729900 | -1.82640800 |
| C | -2.74404600 | -5.09889200 | -0.19225100 |
| H | -2.74501500 | -2.02526200 | 2.14588200  |
| C | -2.03181100 | -4.01821200 | 1.84321300  |
| C | -5.65864500 | -3.69971800 | -4.25242200 |
| H | -6.16795200 | -1.71922800 | -3.60571100 |
| C | -4.27141700 | -4.98186900 | -2.74213800 |
| C | -2.03430700 | -5.13271300 | 0.98848800  |
| H | -2.71508200 | -5.96623000 | -0.84140000 |
| H | -1.44425800 | -4.01974200 | 2.75549400  |
| C | -4.96776000 | -4.88100900 | -3.92863500 |
| H | -6.20434400 | -3.62739500 | -5.18793200 |
| H | -3.75082300 | -5.90702000 | -2.52314400 |
| H | -1.46565700 | -6.01953700 | 1.25108500  |
| H | -4.98259200 | -5.72169400 | -4.61529300 |
| C | 0.98490600  | -1.74344600 | -4.35266600 |
| C | 1.23724300  | -2.85089800 | -3.54895800 |
| C | 1.50545600  | -2.69666000 | -2.18376200 |
| C | 1.51294600  | -1.40189300 | -1.64226100 |
| C | 1.25579500  | -0.29648300 | -2.44322300 |
| C | 0.99403600  | -0.45937500 | -3.80421900 |

|   |             |             |             |
|---|-------------|-------------|-------------|
| H | 2.00378600  | -4.80089800 | -1.80497200 |
| H | 0.78616500  | -1.87962300 | -5.41100600 |
| H | 1.23494200  | -3.84856300 | -3.97936700 |
| C | 1.81279500  | -3.84508900 | -1.32292200 |
| C | 1.91038800  | -1.22862000 | -0.19844800 |
| H | 1.28273200  | 0.69537400  | -1.99713100 |
| H | 0.81958600  | 0.41038500  | -4.43246100 |
| C | 1.41950000  | -2.44110600 | 0.59052900  |
| C | 1.79125800  | -3.75556800 | 0.01955300  |
| H | 1.48259500  | -0.29793100 | 0.19081700  |
| N | 0.69603700  | -2.45907500 | 1.64878800  |
| N | 0.15365900  | -1.27831300 | 2.07149800  |
| C | -0.54436600 | -1.29447500 | 3.25510000  |
| O | -0.50749700 | -2.15854100 | 4.10239000  |
| O | -1.25031100 | -0.15347700 | 3.35405600  |
| C | -1.91714500 | 0.02504000  | 4.60496800  |
| H | -1.19405300 | 0.01875500  | 5.42442900  |
| H | -2.40906300 | 0.99496800  | 4.54049500  |
| H | -2.65496500 | -0.76393500 | 4.76791400  |
| C | 1.98937800  | -4.91325000 | 0.94791900  |
| H | 2.80666800  | -4.70761300 | 1.64730500  |
| H | 1.08835700  | -5.07282500 | 1.54802200  |
| H | 2.21569100  | -5.82563400 | 0.39220200  |
| C | 6.84315600  | -0.94222000 | -2.40018500 |
| C | 5.64413600  | -1.24892300 | -3.05541200 |
| C | 4.42916400  | -1.33157500 | -2.38520500 |
| C | 4.41018000  | -1.10909200 | -0.99823600 |
| C | 5.63155300  | -0.81738900 | -0.33223600 |
| C | 6.83701300  | -0.72547200 | -1.03070100 |
| H | 7.77039100  | -0.88244800 | -2.96081700 |
| H | 3.54267800  | -1.55331800 | -2.95801300 |
| H | 7.75432600  | -0.49398300 | -0.49656500 |
| C | 3.94022900  | -0.84571100 | 1.20164400  |
| C | 3.31309300  | -0.72076000 | 2.43853700  |
| C | 4.07784200  | -0.42966200 | 3.56978700  |
| C | 5.46594600  | -0.23927300 | 3.43319500  |
| C | 6.09047400  | -0.33982600 | 2.19463600  |
| C | 5.32848600  | -0.65197500 | 1.06889900  |
| H | 2.24253000  | -0.83074500 | 2.53530200  |
| H | 6.07024800  | -0.00834700 | 4.30297200  |
| H | 7.16188400  | -0.18112100 | 2.10702400  |
| N | 3.37989000  | -1.12580400 | -0.04340200 |
| H | -0.92842500 | 0.45956800  | -2.72373500 |
| H | 5.64980700  | -1.42189500 | -4.12764900 |

|   |            |             |            |
|---|------------|-------------|------------|
| C | 3.35637000 | -0.35634000 | 4.92033600 |
| C | 2.25284100 | 0.71284200  | 4.86092400 |
| C | 2.72204900 | -1.72620900 | 5.21557200 |
| C | 4.30546100 | -0.00227400 | 6.06872700 |
| H | 2.68422900 | 1.70327000  | 4.67793300 |
| H | 1.52352800 | 0.51055300  | 4.06880000 |
| H | 1.71479400 | 0.75018100  | 5.81498100 |
| H | 3.49311400 | -2.50065000 | 5.28672000 |
| H | 2.17818500 | -1.69668600 | 6.16673200 |
| H | 2.01462200 | -2.02462900 | 4.43577900 |
| H | 3.74279100 | 0.04309000  | 7.00685800 |
| H | 5.09141300 | -0.75459400 | 6.19008400 |
| H | 4.78161900 | 0.97242300  | 5.91777500 |

**IMII-3**

|   |             |             |             |
|---|-------------|-------------|-------------|
| C | -4.11980400 | -2.72489300 | -0.19269000 |
| C | -4.83670700 | -3.51981000 | 0.70462400  |
| C | -4.18839800 | -4.48359500 | 1.46663100  |
| C | -2.81063400 | -4.63195100 | 1.33204800  |
| C | -2.06158600 | -3.81706300 | 0.47217000  |
| C | -2.74070800 | -2.85392800 | -0.28781600 |
| C | -6.24458000 | -1.72802300 | 0.04670700  |
| C | -6.29252300 | -3.11689600 | 0.70810700  |
| H | -4.74063400 | -5.10473500 | 2.16586800  |
| H | -2.28841500 | -5.38359600 | 1.91757200  |
| H | -6.00885900 | -0.97288900 | 0.80493000  |
| H | -6.89198400 | -3.81907400 | 0.11544000  |
| C | -5.05487400 | -1.80954100 | -0.95590800 |
| C | -4.63923600 | -0.42439800 | -1.41749500 |
| C | -5.53691900 | -2.42479700 | -2.29846400 |
| C | -5.37505700 | -0.06251800 | -2.55189700 |
| C | -3.75274500 | 0.48644900  | -0.85593200 |
| C | -6.17517500 | -1.24367500 | -3.05348400 |
| H | -6.21962300 | -3.26583200 | -2.14615200 |
| C | -5.29931700 | 1.22489500  | -3.06607000 |
| C | -3.71336900 | 1.81266600  | -1.31197000 |
| H | -6.11824600 | -1.35409700 | -4.14001700 |
| C | -4.49553500 | 2.16205500  | -2.41763000 |
| H | -5.86740100 | 1.50548800  | -3.94829700 |
| H | -4.45982300 | 3.18836200  | -2.77149000 |
| H | -6.71885800 | -3.09421600 | 1.71473500  |
| H | -7.17995100 | -1.44143800 | -0.44264800 |
| H | -4.66290200 | -2.78646300 | -2.85092900 |
| H | -7.23513200 | -1.13172300 | -2.79448400 |
| O | -2.89003800 | 0.08734200  | 0.14850200  |
| O | -2.05205600 | -1.97940900 | -1.10465500 |
| P | -1.48566200 | -0.61444800 | -0.36407800 |
| O | -0.76356000 | -1.00406700 | 0.89538400  |
| O | -0.81917000 | 0.17977500  | -1.43583600 |
| C | -2.90928100 | 2.85697200  | -0.61689100 |
| C | -1.90625200 | 3.49759500  | -1.27207400 |
| C | -3.26569200 | 3.26862400  | 0.73207200  |
| C | -1.18194700 | 4.58613300  | -0.68003700 |
| H | -1.63055400 | 3.18054400  | -2.27506000 |
| C | -2.57412800 | 4.34405900  | 1.34946200  |
| C | -4.29826900 | 2.62160700  | 1.44803200  |
| C | -0.16201800 | 5.24028000  | -1.40567700 |
| C | -1.50312300 | 5.01995000  | 0.62841200  |

|   |             |             |             |
|---|-------------|-------------|-------------|
| C | -2.94033000 | 4.71833900  | 2.66165600  |
| H | -4.84004800 | 1.80879400  | 0.97730900  |
| C | -4.63326800 | 3.00590900  | 2.72769700  |
| C | 0.53743100  | 6.28990000  | -0.85210900 |
| H | 0.05869800  | 4.89714800  | -2.41297300 |
| C | -0.76774200 | 6.09606200  | 1.17304800  |
| C | -3.94616800 | 4.06492400  | 3.34173800  |
| H | -2.42555000 | 5.53420900  | 3.15649700  |
| H | -5.42814400 | 2.49054300  | 3.25751700  |
| C | 0.23146600  | 6.71657400  | 0.45186900  |
| H | 1.31806500  | 6.79004900  | -1.41734500 |
| H | -0.98506000 | 6.45393900  | 2.17289300  |
| H | -4.20616700 | 4.37182300  | 4.35012900  |
| H | 0.77987900  | 7.54176400  | 0.89542000  |
| C | -0.59470400 | -4.04161100 | 0.34304900  |
| C | -0.08273000 | -4.39978200 | -0.86586600 |
| C | 0.26956200  | -4.02501900 | 1.51175400  |
| C | 1.28906600  | -4.79200300 | -1.02956300 |
| H | -0.73343800 | -4.43719100 | -1.73648400 |
| C | 1.61322500  | -4.46990700 | 1.40218400  |
| C | -0.19859500 | -3.56208400 | 2.76172500  |
| C | 1.77841700  | -5.17543800 | -2.30014900 |
| C | 2.15178900  | -4.82330000 | 0.09415500  |
| C | 2.39498000  | -4.54967900 | 2.57585600  |
| H | -1.19635100 | -3.14278500 | 2.82231100  |
| C | 0.59792700  | -3.61905800 | 3.88505700  |
| C | 3.09377400  | -5.54951300 | -2.46740500 |
| H | 1.09300300  | -5.17088500 | -3.14416300 |
| C | 3.50150400  | -5.18622200 | -0.11191200 |
| C | 1.89526000  | -4.14755000 | 3.79623100  |
| H | 3.40685900  | -4.93676300 | 2.52704200  |
| H | 0.21998300  | -3.25705000 | 4.83606500  |
| C | 3.96350900  | -5.54014000 | -1.36235900 |
| H | 3.45886200  | -5.84464400 | -3.44612100 |
| H | 4.20004800  | -5.17186100 | 0.71635800  |
| H | 2.51670200  | -4.21778500 | 4.68409100  |
| H | 5.00633100  | -5.81123800 | -1.49255900 |
| H | 0.82347800  | -1.20357600 | 0.65605100  |
| C | 2.51589100  | 3.92117000  | -4.54337100 |
| C | 2.16551600  | 2.62279800  | -4.88330100 |
| C | 2.02704000  | 1.64773700  | -3.88560900 |
| C | 2.22293800  | 1.98807200  | -2.54109200 |
| C | 2.57211500  | 3.29160600  | -2.20463900 |
| C | 2.72515800  | 4.25069000  | -3.20342400 |

|   |             |             |             |
|---|-------------|-------------|-------------|
| H | 1.55384900  | 0.05988900  | -5.28666500 |
| H | 2.63351000  | 4.67416200  | -5.31540700 |
| H | 2.00675600  | 2.34446100  | -5.92126500 |
| C | 1.73364300  | 0.27437600  | -4.23481000 |
| C | 2.04385900  | 0.95090900  | -1.44728500 |
| H | 2.73014300  | 3.55776200  | -1.16319100 |
| H | 3.00935900  | 5.26250500  | -2.93146900 |
| C | 1.88332600  | -0.47057700 | -1.95510900 |
| C | 1.68416300  | -0.75685300 | -3.35613100 |
| H | 1.05532000  | 1.14344000  | -0.99706700 |
| N | 1.84838400  | -1.47010400 | -1.11199100 |
| N | 1.79136600  | -1.31649700 | 0.24994400  |
| C | 2.93138900  | -1.56579500 | 0.96770200  |
| O | 4.00811400  | -1.84865800 | 0.48662200  |
| O | 2.67204300  | -1.40848300 | 2.26735900  |
| C | 3.81446700  | -1.49301900 | 3.11789700  |
| H | 4.55490400  | -0.74248000 | 2.83015100  |
| H | 4.26323500  | -2.48754500 | 3.06482100  |
| C | 1.37550700  | -2.16154600 | -3.78131700 |
| H | 2.20873800  | -2.83941900 | -3.56811800 |
| H | 0.48679600  | -2.53254500 | -3.25500400 |
| H | 1.17580000  | -2.19458300 | -4.85318200 |
| C | 2.82351500  | 2.20680400  | 3.53731200  |
| C | 1.58901500  | 1.92979400  | 2.90298100  |
| C | 1.58541500  | 1.56089400  | 1.56159100  |
| C | 2.80839700  | 1.47463600  | 0.89348500  |
| C | 4.04000300  | 1.73075900  | 1.52449400  |
| C | 4.03431700  | 2.10909200  | 2.87207800  |
| H | 2.82566400  | 2.49892100  | 4.58353900  |
| H | 0.66076200  | 1.29648700  | 1.05830500  |
| H | 4.96605300  | 2.31626700  | 3.39128000  |
| C | 4.41993600  | 1.10940800  | -0.65204300 |
| C | 5.11962500  | 0.80478100  | -1.81905900 |
| C | 6.50568500  | 0.89093300  | -1.77484000 |
| C | 7.17755800  | 1.26941700  | -0.60252500 |
| C | 6.47187100  | 1.57304500  | 0.55519800  |
| C | 5.07726000  | 1.49760500  | 0.53661100  |
| H | 4.60274100  | 0.50622900  | -2.72685500 |
| H | 7.07886100  | 0.65728500  | -2.66662600 |
| H | 8.26136500  | 1.32367100  | -0.60274900 |
| H | 6.99559300  | 1.86438700  | 1.46114500  |
| N | 3.04980400  | 1.09474400  | -0.42464300 |
| C | 0.29207100  | 2.02756700  | 3.71224200  |
| C | -0.93400200 | 1.64923800  | 2.87635600  |



|   |             |             |             |
|---|-------------|-------------|-------------|
| C | 0.37191500  | 1.06881500  | 4.91177500  |
| C | 0.12075700  | 3.47069500  | 4.21300900  |
| H | -1.02138400 | 2.28450100  | 1.98960700  |
| H | -0.89556300 | 0.60799400  | 2.54407600  |
| H | -1.84375000 | 1.79070200  | 3.47064400  |
| H | 1.19717800  | 1.32162300  | 5.58486500  |
| H | -0.55799600 | 1.11224400  | 5.48952800  |
| H | 0.51310400  | 0.03880900  | 4.56686100  |
| H | 0.06541000  | 4.16601700  | 3.36719900  |
| H | -0.80584100 | 3.56031400  | 4.79154100  |
| H | 0.95203900  | 3.78158400  | 4.85422900  |
| H | 3.44649600  | -1.29474400 | 4.12433200  |
| H | 1.76237400  | -2.42690600 | -1.46141800 |

**TSII-2**Value of imaginary frequency = -1249.2 cm<sup>-1</sup>

|   |             |             |             |
|---|-------------|-------------|-------------|
| C | -1.51216900 | 4.46605400  | 0.11004100  |
| C | -1.66215100 | 5.55713800  | -0.74927400 |
| C | -0.63032300 | 5.93482200  | -1.59881800 |
| C | 0.55526600  | 5.20676700  | -1.57737000 |
| C | 0.72199400  | 4.09041200  | -0.74670000 |
| C | -0.34082200 | 3.71924400  | 0.08821100  |
| C | -3.80895500 | 5.01382200  | 0.09917500  |
| C | -3.04554400 | 6.14682800  | -0.60774000 |
| H | -0.74369200 | 6.77747400  | -2.27448200 |
| H | 1.37932500  | 5.49205300  | -2.22536000 |
| H | -4.16913500 | 4.29706400  | -0.64714300 |
| H | -3.01794800 | 7.05378300  | 0.00875000  |
| C | -2.73826500 | 4.30918400  | 0.98405800  |
| C | -3.23464100 | 2.95292000  | 1.44407600  |
| C | -2.60497000 | 5.04476800  | 2.34540200  |
| C | -3.92760900 | 3.08670200  | 2.65262600  |
| C | -3.17379800 | 1.71433500  | 0.82139100  |
| C | -3.76300600 | 4.48883100  | 3.19563300  |
| H | -2.63060700 | 6.13218200  | 2.22924400  |
| C | -4.62687300 | 2.01447800  | 3.18821900  |
| C | -3.93512500 | 0.63801500  | 1.29746800  |
| H | -3.54507700 | 4.49734400  | 4.26711600  |
| C | -4.65435300 | 0.81065100  | 2.48459100  |
| H | -5.15965500 | 2.11128300  | 4.12980700  |
| H | -5.23935000 | -0.02524500 | 2.85703200  |
| H | -3.48525000 | 6.42072700  | -1.57048200 |
| H | -4.66622100 | 5.35796100  | 0.68477600  |
| H | -1.64728400 | 4.77003500  | 2.80072500  |
| H | -4.68100400 | 5.07027200  | 3.04629500  |
| O | -2.32918300 | 1.53046400  | -0.26969300 |
| O | -0.27621200 | 2.56992600  | 0.86955000  |
| P | -0.76953300 | 1.20395400  | 0.10294900  |
| O | 0.00001600  | 1.01851100  | -1.15819300 |
| O | -0.75227500 | 0.12381100  | 1.17524900  |
| C | -4.05950000 | -0.64478600 | 0.54840500  |
| C | -3.59239600 | -1.80261100 | 1.08387500  |
| C | -4.78587300 | -0.67341200 | -0.71112000 |
| C | -3.81409300 | -3.07501300 | 0.45547400  |
| H | -3.03599500 | -1.77850100 | 2.01802200  |
| C | -5.02616400 | -1.91406300 | -1.35955500 |
| C | -5.25566400 | 0.51464500  | -1.31383200 |
| C | -3.32410200 | -4.25696100 | 1.05261900  |

|   |             |             |             |
|---|-------------|-------------|-------------|
| C | -4.54019800 | -3.14836800 | -0.75680100 |
| C | -5.70995500 | -1.90790700 | -2.59485600 |
| H | -5.09085800 | 1.46317200  | -0.81424800 |
| C | -5.91895700 | 0.49137300  | -2.52139800 |
| C | -3.53819200 | -5.48580500 | 0.46987800  |
| H | -2.77887900 | -4.17193400 | 1.98780400  |
| C | -4.75244800 | -4.42271700 | -1.32999000 |
| C | -6.14573700 | -0.73273900 | -3.16979300 |
| H | -5.89549000 | -2.84086800 | -3.11500600 |
| H | -6.26568900 | 1.41804900  | -2.96777100 |
| C | -4.25989000 | -5.56530100 | -0.73405200 |
| H | -3.15460400 | -6.38862400 | 0.93492800  |
| H | -5.30592700 | -4.51842700 | -2.25723500 |
| H | -6.66539800 | -0.75711500 | -4.12254700 |
| H | -4.43279500 | -6.53096800 | -1.19881600 |
| C | 2.05216100  | 3.41822400  | -0.72339200 |
| C | 2.81409300  | 3.52622300  | 0.39762400  |
| C | 2.61168900  | 2.81316600  | -1.91899000 |
| C | 4.17207900  | 3.06059100  | 0.44672600  |
| H | 2.40870800  | 4.01773500  | 1.27969100  |
| C | 3.96341800  | 2.37784500  | -1.92190400 |
| C | 1.82838900  | 2.63736200  | -3.08058000 |
| C | 4.93251800  | 3.19858600  | 1.63087900  |
| C | 4.75490900  | 2.46914400  | -0.70079200 |
| C | 4.49891200  | 1.85417400  | -3.11874100 |
| H | 0.78004700  | 2.91219300  | -3.04881200 |
| C | 2.37166300  | 2.10010400  | -4.22781400 |
| C | 6.22898000  | 2.73757200  | 1.69406100  |
| H | 4.47139900  | 3.67757000  | 2.49116300  |
| C | 6.07892400  | 1.98719800  | -0.60005900 |
| C | 3.72406300  | 1.72370600  | -4.25178100 |
| H | 5.53939800  | 1.55149600  | -3.15915900 |
| H | 1.75341900  | 1.96737500  | -5.11021200 |
| C | 6.79936200  | 2.11689700  | 0.56875300  |
| H | 6.80524100  | 2.84665500  | 2.60747800  |
| H | 6.54249300  | 1.49083600  | -1.44459000 |
| H | 4.15922300  | 1.31624300  | -5.15941700 |
| H | 7.81305000  | 1.73263200  | 0.61996300  |
| H | 1.62196900  | 0.31926800  | -0.74607800 |
| C | -0.77243800 | -3.46686900 | 5.06373500  |
| C | -0.14955700 | -2.24602200 | 5.23226500  |
| C | 0.51166200  | -1.63428900 | 4.15041800  |
| C | 0.52423700  | -2.25353800 | 2.88816600  |
| C | -0.10718300 | -3.49409200 | 2.72995200  |

|   |             |             |             |
|---|-------------|-------------|-------------|
| C | -0.73933200 | -4.09257500 | 3.80902800  |
| H | 1.22780900  | 0.04804300  | 5.31126300  |
| H | -1.27600000 | -3.94547000 | 5.89686600  |
| H | -0.15023600 | -1.74827800 | 6.19812400  |
| C | 1.24791300  | -0.41273100 | 4.32543300  |
| C | 1.16623500  | -1.57488000 | 1.73610900  |
| H | -0.09453500 | -3.98295400 | 1.75994400  |
| H | -1.21400600 | -5.06087500 | 3.67872700  |
| C | 1.97943100  | -0.40029200 | 2.03157600  |
| C | 1.97610400  | 0.19157000  | 3.34889200  |
| H | 0.18297800  | -0.81809700 | 1.30522600  |
| N | 2.60683100  | 0.26796100  | 1.06673500  |
| N | 2.47422200  | -0.01201100 | -0.26706400 |
| C | 3.48503600  | -0.65758500 | -0.92738600 |
| O | 4.54044100  | -0.99436600 | -0.43690300 |
| O | 3.11123500  | -0.85476200 | -2.19605000 |
| C | 4.05953100  | -1.55868300 | -2.99424700 |
| H | 4.26574400  | -2.53984700 | -2.55914300 |
| H | 4.99140500  | -0.99283700 | -3.07521600 |
| C | 2.74465300  | 1.45694600  | 3.59539000  |
| H | 3.81171000  | 1.32451300  | 3.38459100  |
| H | 2.37290400  | 2.26993800  | 2.95955900  |
| H | 2.64076200  | 1.76429400  | 4.63707500  |
| C | 0.84549800  | -3.70772700 | -3.07012900 |
| C | -0.02274200 | -2.73549400 | -2.52039200 |
| C | 0.19444400  | -2.28556100 | -1.22024700 |
| C | 1.27267600  | -2.81000300 | -0.50530100 |
| C | 2.13116200  | -3.78655900 | -1.04963400 |
| C | 1.90487100  | -4.23629400 | -2.35374100 |
| H | 0.67324800  | -4.05480900 | -4.08476100 |
| H | -0.44315400 | -1.53524300 | -0.76853200 |
| H | 2.55574900  | -4.98440600 | -2.79844200 |
| C | 2.83203100  | -3.26603400 | 1.06554800  |
| C | 3.59577400  | -3.29501200 | 2.23236600  |
| C | 4.68047800  | -4.16282500 | 2.26464300  |
| C | 4.99842500  | -4.97884400 | 1.16762300  |
| C | 4.22822300  | -4.94662700 | 0.01177600  |
| C | 3.13063000  | -4.08448200 | -0.04424300 |
| H | 3.35401100  | -2.66483700 | 3.08404500  |
| H | 5.29493500  | -4.20722800 | 3.15850700  |
| H | 5.85458800  | -5.64300700 | 1.22660500  |
| H | 4.47388400  | -5.58028500 | -0.83578400 |
| N | 1.71553300  | -2.48891700 | 0.77445000  |
| C | -1.16815900 | -2.19829800 | -3.38405300 |

|   |             |             |             |
|---|-------------|-------------|-------------|
| C | -2.00093100 | -1.15370900 | -2.63951300 |
| C | -0.57714900 | -1.54134600 | -4.64199300 |
| C | -2.09017900 | -3.36078700 | -3.78561900 |
| H | -2.39103900 | -1.55970300 | -1.70117000 |
| H | -1.41280200 | -0.26185200 | -2.41061100 |
| H | -2.85995800 | -0.85628100 | -3.25185600 |
| H | -0.02734700 | -2.25974500 | -5.25857900 |
| H | -1.37816200 | -1.11464900 | -5.25628000 |
| H | 0.10935200  | -0.73498400 | -4.36193600 |
| H | -2.51309100 | -3.83961400 | -2.89579000 |
| H | -2.91909500 | -2.98782700 | -4.39848500 |
| H | -1.56087000 | -4.12473300 | -4.36427100 |
| H | 3.59744700  | -1.66981000 | -3.97475600 |
| H | 3.13712200  | 1.10491200  | 1.29738800  |

**IMII-4**

|   |             |             |             |
|---|-------------|-------------|-------------|
| C | -4.73452500 | 1.80622700  | -0.55724000 |
| C | -5.40403100 | 2.31063200  | -1.67608200 |
| C | -4.86493600 | 3.36029500  | -2.40925000 |
| C | -3.64542600 | 3.90352800  | -2.01454300 |
| C | -2.93374100 | 3.39452400  | -0.92071700 |
| C | -3.49337000 | 2.32196600  | -0.21734500 |
| C | -6.45303800 | 0.27147100  | -1.06402600 |
| C | -6.67866300 | 1.53503400  | -1.91190500 |
| H | -5.38201300 | 3.75302200  | -3.27978000 |
| H | -3.21528000 | 4.73511100  | -2.56551300 |
| H | -5.88124800 | -0.46138900 | -1.64417400 |
| H | -7.54697000 | 2.10366800  | -1.55729900 |
| C | -5.57657500 | 0.75221700  | 0.13005400  |
| C | -4.97195800 | -0.42891000 | 0.86303300  |
| C | -6.48195200 | 1.34529200  | 1.24547100  |
| C | -5.85411700 | -0.86974500 | 1.85717000  |
| C | -3.80020400 | -1.13522800 | 0.64122800  |
| C | -6.99169800 | 0.11348300  | 2.01687100  |
| H | -7.28332000 | 1.96778500  | 0.83765100  |
| C | -5.61404100 | -2.05067400 | 2.54566600  |
| C | -3.56105200 | -2.36019400 | 1.27358100  |
| H | -7.20603000 | 0.32999800  | 3.06684300  |
| C | -4.48894500 | -2.80687100 | 2.21808000  |
| H | -6.29612000 | -2.39124900 | 3.31911100  |
| H | -4.30757500 | -3.75805100 | 2.70965500  |
| H | -6.84389700 | 1.31395000  | -2.96957500 |
| H | -7.37871500 | -0.20373200 | -0.72795000 |
| H | -5.86575600 | 1.96609100  | 1.90467600  |
| H | -7.91214000 | -0.28396600 | 1.57276700  |
| O | -2.81222200 | -0.60796600 | -0.20189500 |
| O | -2.78908400 | 1.72572500  | 0.83548300  |
| P | -1.82795700 | 0.49337600  | 0.44026800  |
| O | -0.70243900 | 0.81468100  | -0.45381300 |
| O | -1.46870800 | -0.03102700 | 1.89047800  |
| C | -2.41096500 | -3.23307900 | 0.89632600  |
| C | -1.27351000 | -3.26776600 | 1.63662000  |
| C | -2.56521300 | -4.12280800 | -0.24214300 |
| C | -0.21029700 | -4.19201300 | 1.35071000  |
| H | -1.16128700 | -2.60062900 | 2.48783900  |
| C | -1.54226300 | -5.05755800 | -0.54675900 |
| C | -3.71481000 | -4.06714900 | -1.06299700 |
| C | 0.95371200  | -4.20973400 | 2.14922000  |
| C | -0.34343200 | -5.10893000 | 0.27994400  |

|   |             |             |             |
|---|-------------|-------------|-------------|
| C | -1.71315100 | -5.89847300 | -1.66759900 |
| H | -4.49966100 | -3.35510800 | -0.82792500 |
| C | -3.85050700 | -4.89596200 | -2.15593300 |
| C | 1.95681500  | -5.12276100 | 1.90889000  |
| H | 1.04654200  | -3.49303100 | 2.96259400  |
| C | 0.70119100  | -6.03281000 | 0.05709600  |
| C | -2.83893400 | -5.82035400 | -2.46014100 |
| H | -0.94321400 | -6.61540300 | -1.92949100 |
| H | -4.73759600 | -4.83468500 | -2.77841600 |
| C | 1.82550700  | -6.04286300 | 0.85573900  |
| H | 2.84624000  | -5.12930600 | 2.52951500  |
| H | 0.62897600  | -6.75555800 | -0.74756700 |
| H | -2.93943900 | -6.47545500 | -3.31989900 |
| H | 2.61347200  | -6.76501600 | 0.66667100  |
| C | -1.66133800 | 4.03879300  | -0.48918600 |
| C | -1.63566100 | 4.70380200  | 0.69685500  |
| C | -0.48961200 | 4.03608900  | -1.34452400 |
| C | -0.46015200 | 5.37689100  | 1.16707600  |
| H | -2.52335200 | 4.72203000  | 1.32492800  |
| C | 0.68029600  | 4.72709600  | -0.93253000 |
| C | -0.49005800 | 3.36296100  | -2.58807600 |
| C | -0.45270300 | 5.99876500  | 2.43470100  |
| C | 0.71530000  | 5.36838300  | 0.37720500  |
| C | 1.78517000  | 4.76609000  | -1.81328100 |
| H | -1.36632600 | 2.79394800  | -2.87931100 |
| C | 0.60119300  | 3.41970000  | -3.42661300 |
| C | 0.69641400  | 6.57510300  | 2.92919900  |
| H | -1.36824100 | 5.99805800  | 3.02038200  |
| C | 1.88415900  | 5.95146200  | 0.91535700  |
| C | 1.74111100  | 4.14523200  | -3.04252900 |
| H | 2.68586700  | 5.29847400  | -1.53097200 |
| H | 0.58406300  | 2.89643300  | -4.37756800 |
| C | 1.87647000  | 6.53847100  | 2.16410800  |
| H | 0.69760700  | 7.04393500  | 3.90819000  |
| H | 2.81245100  | 5.92590000  | 0.35634400  |
| H | 2.60061300  | 4.20092100  | -3.70365000 |
| H | 2.79025800  | 6.97144100  | 2.55863500  |
| H | 1.15798600  | 1.13351600  | -1.20160500 |
| C | 2.93036500  | -2.60672000 | 4.88389100  |
| C | 2.07791400  | -1.53108500 | 4.84203400  |
| C | 2.04504300  | -0.68190400 | 3.70670100  |
| C | 2.87159700  | -0.96966100 | 2.58850400  |
| C | 3.72993700  | -2.10005700 | 2.64948200  |
| C | 3.76901300  | -2.88262800 | 3.77817700  |

|   |             |             |             |
|---|-------------|-------------|-------------|
| H | 0.59613100  | 0.70415900  | 4.52072800  |
| H | 2.96617100  | -3.24358700 | 5.76193400  |
| H | 1.43188700  | -1.29847100 | 5.68444600  |
| C | 1.23092200  | 0.48001700  | 3.66598800  |
| C | 2.85731100  | -0.08614700 | 1.46463500  |
| H | 4.36105800  | -2.33589100 | 1.79858600  |
| H | 4.44664100  | -3.73021200 | 3.81934800  |
| C | 2.06794500  | 1.05472500  | 1.45681600  |
| C | 1.23673800  | 1.34186100  | 2.59730700  |
| H | -0.50763300 | -0.05974900 | 2.05971300  |
| N | 2.09170100  | 1.99487300  | 0.42064300  |
| N | 2.02658700  | 1.55194600  | -0.88082000 |
| C | 3.08641000  | 1.71770600  | -1.71672900 |
| O | 4.13792000  | 2.25900000  | -1.45148200 |
| O | 2.78839400  | 1.17137500  | -2.91364600 |
| C | 3.82703100  | 1.26039700  | -3.88241300 |
| H | 4.76543100  | 0.87130000  | -3.48111600 |
| H | 3.97611700  | 2.29766100  | -4.19796100 |
| C | 0.38974400  | 2.58404500  | 2.60839700  |
| H | 1.01322400  | 3.48663500  | 2.62513700  |
| H | -0.24884000 | 2.64845100  | 1.71896200  |
| H | -0.25514700 | 2.60292200  | 3.48943700  |
| C | 3.32584900  | -2.32543900 | -3.20153500 |
| C | 2.13632200  | -2.12857500 | -2.45863500 |
| C | 2.21270400  | -1.52149800 | -1.21071000 |
| C | 3.46036100  | -1.08913100 | -0.75570300 |
| C | 4.64334000  | -1.27164200 | -1.49532500 |
| C | 4.56338600  | -1.91517100 | -2.73599900 |
| H | 3.26590900  | -2.80643500 | -4.17377500 |
| H | 1.32786000  | -1.32769300 | -0.61288000 |
| H | 5.45687100  | -2.07377800 | -3.33424100 |
| C | 5.11669200  | -0.11298500 | 0.42595400  |
| C | 5.86214600  | 0.54986000  | 1.40038800  |
| C | 7.22821800  | 0.67562200  | 1.18238300  |
| C | 7.83863500  | 0.15469500  | 0.02997400  |
| C | 7.08876800  | -0.51121700 | -0.93096900 |
| C | 5.71314900  | -0.65675900 | -0.73434400 |
| H | 5.38663500  | 0.95757600  | 2.28687300  |
| H | 7.83614200  | 1.19050700  | 1.92013300  |
| H | 8.90837200  | 0.27498800  | -0.10860500 |
| H | 7.56254600  | -0.91642800 | -1.82078700 |
| N | 3.75124700  | -0.36719900 | 0.39616000  |
| C | 0.79719900  | -2.54233000 | -3.07584700 |
| C | -0.38316600 | -2.22289600 | -2.15387100 |



|   |             |             |             |
|---|-------------|-------------|-------------|
| C | 0.59861900  | -1.77055600 | -4.39159100 |
| C | 0.80636400  | -4.05184000 | -3.36151600 |
| H | -0.27818600 | -2.71747400 | -1.18268100 |
| H | -0.48232100 | -1.14626400 | -1.98035900 |
| H | -1.31432200 | -2.58114600 | -2.60761200 |
| H | 1.38053200  | -2.00196700 | -5.12189300 |
| H | -0.36763100 | -2.03023100 | -4.83875900 |
| H | 0.61322100  | -0.69073000 | -4.20739900 |
| H | 0.93386400  | -4.61575200 | -2.43070200 |
| H | -0.14172700 | -4.35577400 | -3.81951100 |
| H | 1.61683800  | -4.33018400 | -4.04246500 |
| H | 3.49884000  | 0.65465400  | -4.72727300 |
| H | 1.47725700  | 2.78705000  | 0.56733900  |

**DIII**

|   |             |             |             |
|---|-------------|-------------|-------------|
| C | 2.85817800  | -0.09537700 | 5.34225800  |
| C | 3.76513000  | -0.91928300 | 4.72010700  |
| C | 3.54599500  | -1.34956600 | 3.38683600  |
| C | 2.37359700  | -0.90591300 | 2.71165100  |
| C | 1.44568700  | -0.06230700 | 3.38029000  |
| C | 1.68660300  | 0.33517900  | 4.67061600  |
| H | 5.32546500  | -2.57111200 | 3.24589100  |
| H | 3.03534400  | 0.22757000  | 6.36393000  |
| H | 4.65850300  | -1.25329300 | 5.24102900  |
| C | 4.44973800  | -2.21359200 | 2.70891900  |
| C | 2.17060900  | -1.29994100 | 1.37331900  |
| H | 0.55544600  | 0.25112100  | 2.84046000  |
| H | 0.98225500  | 0.98185700  | 5.18425100  |
| C | 3.08164600  | -2.11502300 | 0.73511700  |
| C | 4.23524800  | -2.62353300 | 1.41609300  |
| H | 1.26544500  | -0.98307900 | 0.86938200  |
| N | 2.93592800  | -2.53050600 | -0.60439800 |
| N | 2.09873800  | -1.91726100 | -1.29525000 |
| C | 2.04391200  | -2.46495000 | -2.63917400 |
| O | 2.55740200  | -3.47658700 | -3.03168700 |
| O | 1.29131800  | -1.64001200 | -3.35665400 |
| C | 1.12484700  | -2.01384600 | -4.72803300 |
| H | 0.58286700  | -2.95962700 | -4.79505200 |
| H | 0.55048800  | -1.21105900 | -5.18667700 |
| H | 2.09936900  | -2.11863300 | -5.21087300 |
| C | 5.16202500  | -3.59022900 | 0.73285000  |
| H | 4.63395200  | -4.51440500 | 0.47864800  |
| H | 5.54832000  | -3.18252600 | -0.20434700 |
| H | 6.00132500  | -3.83817700 | 1.38601600  |
| C | -3.24802400 | 2.69812000  | 0.44982600  |
| C | -4.03651800 | 3.11687800  | 1.52650600  |
| C | -4.85096400 | 2.21447800  | 2.19874500  |
| C | -4.85974700 | 0.88031500  | 1.79878800  |
| C | -4.03263300 | 0.41744300  | 0.76766000  |
| C | -3.22223800 | 1.35266400  | 0.11224800  |
| C | -2.50644200 | 4.86460900  | 1.02154500  |
| C | -3.80264800 | 4.58379600  | 1.80467200  |
| H | -5.46666800 | 2.53739700  | 3.03311400  |
| H | -5.49702700 | 0.16480600  | 2.31054900  |
| H | -1.63968800 | 4.59869800  | 1.63650600  |
| H | -4.63575600 | 5.18968500  | 1.42838700  |
| C | -2.57041700 | 3.89496900  | -0.19179400 |
| C | -1.23992200 | 3.79357200  | -0.91511400 |

|   |             |             |             |
|---|-------------|-------------|-------------|
| C | -3.45404300 | 4.51386400  | -1.31370300 |
| C | -1.17735600 | 4.74535900  | -1.93983000 |
| C | -0.15107600 | 2.96193900  | -0.69845300 |
| C | -2.50463500 | 5.45303300  | -2.07674800 |
| H | -4.33818100 | 5.01582000  | -0.91097000 |
| C | -0.01998500 | 4.90848900  | -2.68824000 |
| C | 1.03229200  | 3.10176900  | -1.43575900 |
| H | -2.79467000 | 5.59686700  | -3.12094600 |
| C | 1.07891600  | 4.09576100  | -2.41990800 |
| H | 0.02833500  | 5.64826900  | -3.48200300 |
| H | 1.99429800  | 4.20888200  | -2.99299200 |
| H | -3.70609900 | 4.79271600  | 2.87345300  |
| H | -2.40023700 | 5.90754000  | 0.71006300  |
| H | -3.78832200 | 3.71016000  | -1.97862300 |
| H | -2.46418900 | 6.44440800  | -1.60923200 |
| O | -0.24366500 | 1.94374800  | 0.24858600  |
| O | -2.29911200 | 0.91413500  | -0.84418500 |
| P | -0.87284000 | 0.52250900  | -0.20045900 |
| O | -0.89684000 | -0.38342800 | 0.95945900  |
| O | -0.13579700 | 0.05775300  | -1.51009300 |
| C | 2.19069300  | 2.18077900  | -1.26717900 |
| C | 2.59757700  | 1.46206700  | -2.34821000 |
| C | 2.91274600  | 2.06608600  | -0.01214800 |
| C | 3.70571700  | 0.55718000  | -2.29055900 |
| H | 2.04659600  | 1.53754600  | -3.28266400 |
| C | 4.03741700  | 1.20168700  | 0.07310900  |
| C | 2.54146600  | 2.82224100  | 1.12270500  |
| C | 4.04664900  | -0.21893500 | -3.42114100 |
| C | 4.43132800  | 0.41134500  | -1.08551700 |
| C | 4.74440500  | 1.13373400  | 1.29392600  |
| H | 1.69149700  | 3.49331500  | 1.05618200  |
| C | 3.24424200  | 2.72717000  | 2.30366200  |
| C | 5.06932300  | -1.13911500 | -3.36169300 |
| H | 3.47373300  | -0.08250100 | -4.33524600 |
| C | 5.48580700  | -0.52660500 | -1.05657400 |
| C | 4.35775400  | 1.87598100  | 2.38876400  |
| H | 5.60958300  | 0.48621400  | 1.38203500  |
| H | 2.93903800  | 3.31067200  | 3.16666300  |
| C | 5.79328200  | -1.28974800 | -2.16571800 |
| H | 5.31604600  | -1.74540000 | -4.22744600 |
| H | 6.05831200  | -0.67700400 | -0.14763400 |
| H | 4.91444900  | 1.80083900  | 3.31767300  |
| H | 6.60295200  | -2.01133600 | -2.11307900 |
| C | -4.05683000 | -1.01555700 | 0.36097700  |

|   |             |             |             |
|---|-------------|-------------|-------------|
| C | -4.40487300 | -1.33570600 | -0.91352400 |
| C | -3.77757700 | -2.07157500 | 1.31772000  |
| C | -4.56185000 | -2.69435200 | -1.34379000 |
| H | -4.60308700 | -0.54547100 | -1.63351200 |
| C | -3.95271900 | -3.42824400 | 0.93803900  |
| C | -3.30214400 | -1.77675200 | 2.61553200  |
| C | -4.94347700 | -2.98082400 | -2.67311100 |
| C | -4.36610000 | -3.75064300 | -0.42215000 |
| C | -3.69538800 | -4.43296800 | 1.89776800  |
| H | -3.10935600 | -0.74341400 | 2.88090200  |
| C | -3.04808900 | -2.77797700 | 3.52614200  |
| C | -5.13148500 | -4.28005500 | -3.08815900 |
| H | -5.08760600 | -2.15346100 | -3.36283300 |
| C | -4.56931900 | -5.07334900 | -0.87400400 |
| C | -3.26029500 | -4.11883500 | 3.16693300  |
| H | -3.83006600 | -5.47669400 | 1.63809800  |
| H | -2.67459700 | -2.53076700 | 4.51486500  |
| C | -4.94382400 | -5.33346500 | -2.17575300 |
| H | -5.42361700 | -4.49229700 | -4.11182600 |
| H | -4.43144400 | -5.90754300 | -0.19596800 |
| H | -3.06732500 | -4.91134900 | 3.88322300  |
| H | -5.09317800 | -6.35965800 | -2.49688500 |
| H | 0.66771900  | -0.49715400 | -1.36551100 |

**DIII<sub>R2</sub>**

|   |             |             |             |
|---|-------------|-------------|-------------|
| C | -4.51956400 | 5.58252500  | -0.94134900 |
| C | -4.80877100 | 4.21276800  | -1.06012300 |
| C | -3.81091800 | 3.24913900  | -1.00571200 |
| C | -2.49777300 | 3.68769000  | -0.82672700 |
| C | -2.18952900 | 5.06422700  | -0.70424700 |
| C | -3.21291300 | 6.01431500  | -0.76329300 |
| H | -5.32698100 | 6.30617800  | -0.99073200 |
| H | -4.03632100 | 2.19289800  | -1.10139100 |
| H | -2.98609000 | 7.07283300  | -0.67078800 |
| C | -0.27005800 | 3.81732200  | -0.55958200 |
| C | 1.08570800  | 3.53045200  | -0.41531300 |
| C | 1.98279600  | 4.58381000  | -0.22750700 |
| C | 1.49809900  | 5.90697800  | -0.20141600 |
| C | 0.14763000  | 6.19390200  | -0.35243000 |
| C | -0.75525900 | 5.14654500  | -0.53041000 |
| H | 1.42815300  | 2.50003900  | -0.45464800 |
| H | 2.19008800  | 6.72859600  | -0.05896400 |
| H | -0.19937800 | 7.22326000  | -0.32816000 |
| N | -1.33095500 | 2.95425300  | -0.74059100 |
| H | -1.25536500 | 1.94177600  | -0.77123000 |
| C | -1.21853500 | -4.02527500 | -0.79204900 |
| C | -1.86241600 | -4.66570500 | -1.85510100 |
| C | -3.13337500 | -4.26897900 | -2.24448900 |
| C | -3.74566500 | -3.21789800 | -1.57099500 |
| C | -3.09103600 | -2.49033100 | -0.56365500 |
| C | -1.80006800 | -2.91051400 | -0.20707700 |
| C | 0.36830700  | -5.48171800 | -1.75836400 |
| C | -0.99506000 | -5.76952600 | -2.41193500 |
| H | -3.65421100 | -4.77889200 | -3.04944200 |
| H | -4.76086700 | -2.93948200 | -1.83290000 |
| H | 0.92446900  | -4.75720100 | -2.36348900 |
| H | -1.38087200 | -6.75270900 | -2.11731500 |
| C | 0.00796500  | -4.82112600 | -0.39747600 |
| C | 1.22694200  | -4.21819400 | 0.27033700  |
| C | -0.36832200 | -5.92220200 | 0.63659400  |
| C | 1.83991400  | -5.18162000 | 1.08117900  |
| C | 1.81014500  | -2.96598700 | 0.14045600  |
| C | 0.98335400  | -6.42092300 | 1.17138600  |
| H | -0.98366000 | -6.70990700 | 0.19367900  |
| C | 3.06069100  | -4.92635700 | 1.68568100  |
| C | 3.06939900  | -2.69356200 | 0.69445300  |
| H | 0.92201300  | -6.80975400 | 2.19121300  |
| C | 3.67581600  | -3.69926800 | 1.45997100  |

|   |             |             |             |
|---|-------------|-------------|-------------|
| H | 3.53711500  | -5.67217000 | 2.31502700  |
| H | 4.65357200  | -3.49770600 | 1.88609200  |
| H | -0.95441200 | -5.75126700 | -3.50438500 |
| H | 0.98978000  | -6.37252800 | -1.63255400 |
| H | -0.93816200 | -5.45758000 | 1.44861900  |
| H | 1.39265200  | -7.21975900 | 0.54127700  |
| O | 1.12068600  | -1.95728600 | -0.54362700 |
| O | -1.06972800 | -2.21506800 | 0.76662100  |
| P | -0.01018600 | -1.12320400 | 0.25087400  |
| O | -0.51929700 | -0.02126600 | -0.58278900 |
| O | 0.61073100  | -0.75207300 | 1.66201500  |
| C | 3.83346300  | -1.42632500 | 0.51007300  |
| C | 4.29548200  | -0.78440800 | 1.61893100  |
| C | 4.26443700  | -0.98191100 | -0.80640100 |
| C | 5.26028000  | 0.27434000  | 1.54928700  |
| H | 3.97386200  | -1.11792300 | 2.60294000  |
| C | 5.20326000  | 0.08006600  | -0.91416500 |
| C | 3.80398600  | -1.60745800 | -1.98730800 |
| C | 5.76475300  | 0.85822700  | 2.73265000  |
| C | 5.74871700  | 0.69403100  | 0.28996000  |
| C | 5.59902700  | 0.50196400  | -2.20322300 |
| H | 3.11940500  | -2.44452400 | -1.91564000 |
| C | 4.21109900  | -1.17679700 | -3.23061900 |
| C | 6.74979600  | 1.81930800  | 2.67953200  |
| H | 5.37078200  | 0.52173700  | 3.68797200  |
| C | 6.76421000  | 1.67646000  | 0.26448100  |
| C | 5.10971700  | -0.10407800 | -3.33982200 |
| H | 6.29889800  | 1.32280600  | -2.31062300 |
| H | 3.83652200  | -1.66728000 | -4.12334800 |
| C | 7.25635900  | 2.22514000  | 1.43159900  |
| H | 7.13896200  | 2.25669500  | 3.59339900  |
| H | 7.18264700  | 2.00393200  | -0.68076800 |
| H | 5.42659500  | 0.24470600  | -4.31749300 |
| H | 8.04170900  | 2.97317700  | 1.38317300  |
| C | -3.82442900 | -1.41600700 | 0.16037100  |
| C | -3.82050100 | -1.40494400 | 1.52204900  |
| C | -4.67880300 | -0.47934400 | -0.55656600 |
| C | -4.65636700 | -0.52569200 | 2.28575400  |
| H | -3.20070800 | -2.11120600 | 2.06761500  |
| C | -5.59825400 | 0.32655500  | 0.16693800  |
| C | -4.61876500 | -0.34338200 | -1.96401100 |
| C | -4.60018000 | -0.53884000 | 3.69697200  |
| C | -5.57376600 | 0.32329800  | 1.62402400  |
| C | -6.50544900 | 1.13046300  | -0.55935000 |

|   |             |             |             |
|---|-------------|-------------|-------------|
| H | -3.85726600 | -0.88398200 | -2.51442900 |
| C | -5.49721200 | 0.47143500  | -2.64489700 |
| C | -5.42495700 | 0.27401700  | 4.44179500  |
| H | -3.89033900 | -1.20338100 | 4.18222800  |
| C | -6.40660300 | 1.14827000  | 2.41171700  |
| C | -6.47397900 | 1.18909400  | -1.93640000 |
| H | -7.24386600 | 1.72177700  | -0.03010500 |
| H | -5.42903600 | 0.56017200  | -3.72439400 |
| C | -6.33395700 | 1.12494300  | 3.78899900  |
| H | -5.37355100 | 0.26159900  | 5.52585300  |
| H | -7.10897700 | 1.82636500  | 1.94089900  |
| H | -7.18565100 | 1.81277800  | -2.46857900 |
| H | -6.98123600 | 1.77230700  | 4.37230400  |
| H | 1.04252900  | 0.11813200  | 1.66799300  |
| H | -5.83759900 | 3.89526400  | -1.19973600 |
| C | 3.46630400  | 4.25874000  | -0.03578400 |
| C | 3.62378100  | 3.37564500  | 1.21209300  |
| C | 3.98846700  | 3.50575900  | -1.26908100 |
| C | 4.32487000  | 5.51199100  | 0.15815900  |
| H | 3.21041500  | 3.87604600  | 2.09457200  |
| H | 3.10845500  | 2.41692200  | 1.09184100  |
| H | 4.68132900  | 3.16585100  | 1.39838700  |
| H | 3.87129200  | 4.11276200  | -2.17328600 |
| H | 5.05207100  | 3.27508600  | -1.14354200 |
| H | 3.45803300  | 2.56125700  | -1.42375000 |
| H | 5.37000400  | 5.21351300  | 0.29316500  |
| H | 4.27612700  | 6.17764500  | -0.70992300 |
| H | 4.02366600  | 6.07868700  | 1.04524500  |

**COMIII**

|   |             |             |             |
|---|-------------|-------------|-------------|
| C | 4.70270300  | -3.59713000 | 1.30344000  |
| C | 3.61912300  | -4.43107900 | 1.40314500  |
| C | 2.32164900  | -3.90055700 | 1.62305900  |
| C | 2.16387900  | -2.48772600 | 1.71720200  |
| C | 3.30184400  | -1.64424500 | 1.58100300  |
| C | 4.54308100  | -2.19058300 | 1.39205300  |
| H | 1.33060100  | -5.81580900 | 1.72323100  |
| H | 5.69260400  | -4.01188900 | 1.13995500  |
| H | 3.73692300  | -5.50810300 | 1.31953500  |
| C | 1.19143800  | -4.74011300 | 1.80008400  |
| C | 0.88176100  | -1.96826500 | 1.98024100  |
| H | 3.16561200  | -0.56580900 | 1.62552500  |
| H | 5.40980500  | -1.54631600 | 1.28838200  |
| C | -0.19414000 | -2.81766700 | 2.17891800  |
| C | -0.05096700 | -4.24211600 | 2.09946800  |
| H | 0.76625400  | -0.89599000 | 2.10663900  |
| N | -1.44638400 | -2.35990400 | 2.61341000  |
| N | -1.71112100 | -1.14945300 | 2.46888600  |
| C | -2.96145000 | -0.81779600 | 3.12287200  |
| O | -3.88331100 | -1.56296700 | 3.31101200  |
| O | -2.88248300 | 0.45515000  | 3.48774400  |
| C | -3.94784300 | 0.92815500  | 4.32307600  |
| H | -3.93589100 | 0.38949800  | 5.27317200  |
| H | -3.75008000 | 1.98674000  | 4.47994500  |
| H | -4.91844300 | 0.78597800  | 3.84310700  |
| C | -1.21861800 | -5.16091600 | 2.32285200  |
| H | -1.82551600 | -4.84303700 | 3.17379600  |
| H | -1.86920400 | -5.17745400 | 1.44293300  |
| H | -0.86526000 | -6.17994100 | 2.49534600  |
| C | 5.01458800  | -4.30529200 | -2.22689600 |
| C | 5.16073700  | -2.91133700 | -2.10925700 |
| C | 4.07681600  | -2.08676800 | -1.84578900 |
| C | 2.82571000  | -2.68971900 | -1.69558700 |
| C | 2.65986800  | -4.09296900 | -1.80953100 |
| C | 3.76968600  | -4.90068000 | -2.07965400 |
| H | 5.88534500  | -4.91772900 | -2.43965200 |
| H | 4.19219700  | -1.01295900 | -1.73956900 |
| H | 3.65632300  | -5.97754500 | -2.17221200 |
| C | 0.64120600  | -3.09380700 | -1.38215500 |
| C | -0.73387900 | -2.96522600 | -1.18483500 |
| C | -1.52731800 | -4.11332500 | -1.19564700 |
| C | -0.91004500 | -5.37251200 | -1.36423200 |
| C | 0.45762200  | -5.49925300 | -1.56822800 |



|   |             |             |             |
|---|-------------|-------------|-------------|
| C | 1.25204500  | -4.35187400 | -1.59994100 |
| H | -1.16831000 | -1.97665600 | -1.06099300 |
| H | -1.51593600 | -6.27129000 | -1.35390200 |
| H | 0.89980200  | -6.48177700 | -1.71128100 |
| N | 1.60296300  | -2.10891000 | -1.44138900 |
| H | 1.42863200  | -1.12520400 | -1.25560500 |
| C | 0.62542000  | 4.72972500  | -0.67119200 |
| C | 1.09034500  | 5.57771800  | -1.67941200 |
| C | 2.35546100  | 5.39607500  | -2.21994200 |
| C | 3.14906000  | 4.36238600  | -1.73713700 |
| C | 2.69273700  | 3.45837100  | -0.76328700 |
| C | 1.39548500  | 3.65067700  | -0.26369600 |
| C | -1.20636600 | 6.06379700  | -1.33573600 |
| C | 0.05688700  | 6.62843900  | -2.00558700 |
| H | 2.73262200  | 6.06075300  | -2.99140800 |
| H | 4.15973900  | 4.24730400  | -2.11499300 |
| H | -1.70613100 | 5.36941600  | -2.02018400 |
| H | 0.34143400  | 7.59561400  | -1.57349300 |
| C | -0.67593500 | 5.25926500  | -0.11089700 |
| C | -1.77871600 | 4.38065500  | 0.44308500  |
| C | -0.44465100 | 6.22116600  | 1.08715200  |
| C | -2.53925200 | 5.11979900  | 1.35525600  |
| C | -2.18464700 | 3.10149200  | 0.08766400  |
| C | -1.84895700 | 6.42268300  | 1.68591900  |
| H | 0.03628300  | 7.15381900  | 0.77957300  |
| C | -3.75774100 | 4.63656400  | 1.80924900  |
| C | -3.46413100 | 2.63590400  | 0.43031500  |
| H | -1.82821900 | 6.61810600  | 2.76154900  |
| C | -4.22884400 | 3.43031900  | 1.29926600  |
| H | -4.35683600 | 5.20669800  | 2.51316600  |
| H | -5.22310400 | 3.08526500  | 1.56637200  |
| H | -0.06271700 | 6.77696800  | -3.08215100 |
| H | -1.92857500 | 6.82991200  | -1.04115900 |
| H | 0.20456300  | 5.72387900  | 1.81581900  |
| H | -2.36840800 | 7.26470300  | 1.21329500  |
| O | -1.30496500 | 2.27130100  | -0.61313800 |
| O | 0.85508000  | 2.79016800  | 0.69164900  |
| P | -0.09019500 | 1.57466300  | 0.20700900  |
| O | 0.55734300  | 0.55126000  | -0.63387400 |
| O | -0.64270200 | 1.16891800  | 1.61259400  |
| C | -4.10357200 | 1.40746600  | -0.12201900 |
| C | -4.76604800 | 0.58127100  | 0.73446400  |
| C | -4.21914400 | 1.17760000  | -1.55635600 |
| C | -5.61838700 | -0.48057800 | 0.29386100  |

|   |             |             |             |
|---|-------------|-------------|-------------|
| H | -4.70009800 | 0.76575200  | 1.80080300  |
| C | -5.01952400 | 0.10100300  | -2.03005900 |
| C | -3.59752800 | 2.02430800  | -2.50255500 |
| C | -6.32547400 | -1.26219700 | 1.23415900  |
| C | -5.76435800 | -0.72667300 | -1.08964800 |
| C | -5.09272100 | -0.12601600 | -3.42259800 |
| H | -3.03047900 | 2.88256100  | -2.16384900 |
| C | -3.70069400 | 1.78805100  | -3.85555500 |
| C | -7.17020400 | -2.26645000 | 0.81697400  |
| H | -6.17629200 | -1.06551400 | 2.29193700  |
| C | -6.64468100 | -1.75671600 | -1.49002800 |
| C | -4.44130000 | 0.69074900  | -4.32048800 |
| H | -5.67041700 | -0.96152800 | -3.80111600 |
| H | -3.20729600 | 2.45097200  | -4.55917000 |
| C | -7.32965300 | -2.51145800 | -0.55906800 |
| H | -7.70997200 | -2.86611000 | 1.54289900  |
| H | -6.80215200 | -1.96462300 | -2.54239100 |
| H | -4.51079800 | 0.48974100  | -5.38480200 |
| H | -8.00023200 | -3.29657700 | -0.89443700 |
| C | 3.65387000  | 2.47254100  | -0.19669900 |
| C | 3.81224300  | 2.40231600  | 1.15388700  |
| C | 4.55924600  | 1.72796600  | -1.05971500 |
| C | 4.90465100  | 1.69848700  | 1.76136400  |
| H | 3.14230700  | 2.95574300  | 1.80658000  |
| C | 5.69018100  | 1.07762000  | -0.49746900 |
| C | 4.33809000  | 1.63013800  | -2.45373800 |
| C | 5.03970500  | 1.67121700  | 3.16745200  |
| C | 5.88823400  | 1.08949800  | 0.94652500  |
| C | 6.58941400  | 0.41933600  | -1.36650500 |
| H | 3.44001000  | 2.06582600  | -2.87751200 |
| C | 5.22989000  | 0.97694900  | -3.27672500 |
| C | 6.12869700  | 1.07132500  | 3.75905400  |
| H | 4.26826300  | 2.14038300  | 3.77229200  |
| C | 7.00759700  | 0.50332400  | 1.57869000  |
| C | 6.37831400  | 0.38378600  | -2.72877200 |
| H | 7.46369700  | -0.07832000 | -0.96207800 |
| H | 5.03586500  | 0.90975200  | -4.34228400 |
| C | 7.12478900  | 0.49169900  | 2.95339400  |
| H | 6.22435900  | 1.05250200  | 4.83992300  |
| H | 7.79137600  | 0.04482800  | 0.98619600  |
| H | 7.08737200  | -0.12690400 | -3.37305700 |
| H | 7.99227000  | 0.03029000  | 3.41465500  |
| H | -1.00220400 | 0.24091600  | 1.76375400  |
| H | 6.14433000  | -2.46520900 | -2.22493100 |

|   |             |             |             |
|---|-------------|-------------|-------------|
| C | -3.05105500 | -3.96544600 | -1.12336600 |
| C | -3.46795200 | -3.08131300 | 0.06133500  |
| C | -3.51840100 | -3.30712900 | -2.43386500 |
| C | -3.76947400 | -5.31221200 | -0.98646700 |
| H | -3.14551000 | -3.50682100 | 1.01718500  |
| H | -3.05435500 | -2.06952800 | -0.01211100 |
| H | -4.55810700 | -2.99410400 | 0.08605400  |
| H | -3.21825900 | -3.91004200 | -3.29784200 |
| H | -4.60995400 | -3.21145000 | -2.44122100 |
| H | -3.08771400 | -2.30788000 | -2.55185800 |
| H | -4.84827100 | -5.13845200 | -0.91389800 |
| H | -3.59529600 | -5.95724400 | -1.85352600 |
| H | -3.45793700 | -5.85500700 | -0.08715400 |

**TSIII-1**Value of imaginary frequency = -237.8 cm<sup>-1</sup>

|   |             |             |             |
|---|-------------|-------------|-------------|
| C | 5.04958400  | -3.15590400 | 2.27070000  |
| C | 4.10030000  | -4.13946300 | 2.02142700  |
| C | 2.77171700  | -3.78822200 | 1.75764800  |
| C | 2.43231500  | -2.41396700 | 1.70479500  |
| C | 3.40576100  | -1.42863400 | 1.94033800  |
| C | 4.70527300  | -1.79903400 | 2.24548400  |
| H | 2.03835700  | -5.82986100 | 1.51297800  |
| H | 6.07392300  | -3.44232900 | 2.49040600  |
| H | 4.37654700  | -5.18959100 | 2.04839200  |
| C | 1.73377600  | -4.78800900 | 1.57173100  |
| C | 1.08379900  | -2.05641400 | 1.36376600  |
| H | 3.12416300  | -0.37877200 | 1.88051800  |
| H | 5.45367600  | -1.04223900 | 2.45070400  |
| C | 0.05539800  | -3.04491000 | 1.64731900  |
| C | 0.42236400  | -4.46478600 | 1.55458400  |
| H | 0.82372400  | -1.00053900 | 1.41671600  |
| N | -1.15393500 | -2.78250700 | 2.06418700  |
| N | -1.56309800 | -1.54597100 | 2.27567500  |
| C | -2.67650500 | -1.39610700 | 3.10469500  |
| O | -3.44605800 | -2.26677500 | 3.42340700  |
| O | -2.70741300 | -0.12881200 | 3.52810900  |
| C | -3.67669700 | 0.15563500  | 4.54034200  |
| H | -3.44040500 | -0.40023800 | 5.45072200  |
| H | -3.60366000 | 1.22751300  | 4.71932500  |
| H | -4.68408000 | -0.10680200 | 4.21063500  |
| C | -0.67549000 | -5.47951500 | 1.46811600  |
| H | -1.30333500 | -5.44887400 | 2.36382800  |
| H | -1.32510400 | -5.26085800 | 0.61376200  |
| H | -0.26238700 | -6.48402400 | 1.35699100  |
| C | 4.43438400  | -4.24891000 | -1.96061100 |
| C | 4.65760500  | -2.96959200 | -1.44544500 |
| C | 3.59834500  | -2.14133500 | -1.07211200 |
| C | 2.31701200  | -2.65513500 | -1.19923300 |
| C | 2.07471300  | -3.92688100 | -1.74917200 |
| C | 3.13866900  | -4.73351600 | -2.13546100 |
| H | 5.28145900  | -4.86713200 | -2.24033200 |
| H | 3.76983100  | -1.14123400 | -0.69040300 |
| H | 2.96504900  | -5.71671200 | -2.56197700 |
| C | 0.06597400  | -2.93270100 | -1.23431300 |
| C | -1.29696500 | -2.74323200 | -1.12924600 |
| C | -2.15098900 | -3.76058400 | -1.59787800 |
| C | -1.59012300 | -4.91920900 | -2.14890300 |

|   |             |             |             |
|---|-------------|-------------|-------------|
| C | -0.20878800 | -5.09954500 | -2.24921900 |
| C | 0.62749000  | -4.09604300 | -1.78900800 |
| H | -1.69209600 | -1.82343100 | -0.70500700 |
| H | -2.23844100 | -5.70994500 | -2.50768600 |
| H | 0.19669900  | -6.00694400 | -2.68664400 |
| N | 1.09966400  | -2.07771000 | -0.75359600 |
| H | 0.96116400  | -1.04057100 | -0.85329400 |
| C | 0.84286600  | 4.60383100  | -0.59570400 |
| C | 1.23312100  | 5.43750100  | -1.64553800 |
| C | 2.40078500  | 5.17998900  | -2.35160100 |
| C | 3.18294300  | 4.09563800  | -1.97133300 |
| C | 2.80103500  | 3.22672100  | -0.93689100 |
| C | 1.58476700  | 3.47177700  | -0.28299600 |
| C | -0.97353000 | 6.05106300  | -1.02363200 |
| C | 0.23507300  | 6.55554300  | -1.82931300 |
| H | 2.71212500  | 5.82085600  | -3.17122500 |
| H | 4.12564400  | 3.91044400  | -2.47781300 |
| H | -1.59113500 | 5.40563300  | -1.65801900 |
| H | 0.62811300  | 7.49261100  | -1.41580700 |
| C | -0.35819600 | 5.18273100  | 0.11555300  |
| C | -1.43752400 | 4.33536700  | 0.75630800  |
| C | 0.04739700  | 6.08807100  | 1.31009600  |
| C | -2.05628200 | 5.06701600  | 1.77441300  |
| C | -1.93849200 | 3.09419600  | 0.37903100  |
| C | -1.26898400 | 6.32290500  | 2.07468300  |
| H | 0.53229700  | 7.01179700  | 0.98090100  |
| C | -3.24394500 | 4.61931800  | 2.33557600  |
| C | -3.20958900 | 2.69118900  | 0.82472900  |
| H | -1.11514000 | 6.46922200  | 3.14760100  |
| C | -3.83069400 | 3.47034100  | 1.81390600  |
| H | -3.73559600 | 5.17548600  | 3.12843000  |
| H | -4.81047800 | 3.16036600  | 2.16442800  |
| H | -0.00059400 | 6.73945300  | -2.88118700 |
| H | -1.60829900 | 6.85261300  | -0.63524500 |
| H | 0.75133900  | 5.53652200  | 1.94273400  |
| H | -1.79686400 | 7.20831500  | 1.70030600  |
| O | -1.18759200 | 2.28291500  | -0.45688300 |
| O | 1.10108200  | 2.61774300  | 0.69084100  |
| P | 0.05381400  | 1.43405500  | 0.22662100  |
| O | 0.64872200  | 0.61589300  | -0.87871700 |
| O | -0.38549000 | 0.79759800  | 1.50962500  |
| C | -4.01270000 | 1.57052000  | 0.25171300  |
| C | -4.62822200 | 0.70342600  | 1.10192800  |
| C | -4.35879600 | 1.53407000  | -1.16421200 |

|   |             |             |             |
|---|-------------|-------------|-------------|
| C | -5.64802700 | -0.21139300 | 0.68151300  |
| H | -4.38528800 | 0.74012200  | 2.15761100  |
| C | -5.36231600 | 0.63386200  | -1.61927400 |
| C | -3.75558900 | 2.40288300  | -2.10253600 |
| C | -6.27920100 | -1.05672900 | 1.62088300  |
| C | -6.04793500 | -0.23707500 | -0.67324100 |
| C | -5.67652500 | 0.61081400  | -2.99663800 |
| H | -3.01423000 | 3.11686800  | -1.76680800 |
| C | -4.08672100 | 2.36164500  | -3.43875300 |
| C | -7.30329200 | -1.89426600 | 1.23966500  |
| H | -5.93035700 | -1.04614400 | 2.64958900  |
| C | -7.10245800 | -1.10481100 | -1.03827700 |
| C | -5.05051200 | 1.44844800  | -3.89315300 |
| H | -6.42059100 | -0.08444700 | -3.36815000 |
| H | -3.60076200 | 3.03558800  | -4.13713700 |
| C | -7.71970200 | -1.91188300 | -0.10400400 |
| H | -7.78281400 | -2.54064100 | 1.96785900  |
| H | -7.45182100 | -1.14020600 | -2.06420900 |
| H | -5.30789100 | 1.40463500  | -4.94678000 |
| H | -8.53206600 | -2.56360500 | -0.41042500 |
| C | 3.79453300  | 2.21366200  | -0.48630400 |
| C | 4.24383200  | 2.24866300  | 0.79788700  |
| C | 4.45167700  | 1.34621700  | -1.44842400 |
| C | 5.41329900  | 1.52787800  | 1.21524200  |
| H | 3.76249700  | 2.90236000  | 1.52119700  |
| C | 5.64928600  | 0.67198000  | -1.09286400 |
| C | 3.90263900  | 1.14523500  | -2.73529600 |
| C | 5.87675200  | 1.63536400  | 2.54612600  |
| C | 6.15260000  | 0.77216100  | 0.27205000  |
| C | 6.30288500  | -0.09613100 | -2.08199500 |
| H | 2.95335900  | 1.61172000  | -2.97684700 |
| C | 4.54234500  | 0.35656300  | -3.66659000 |
| C | 7.04506700  | 1.01960400  | 2.93966500  |
| H | 5.29696500  | 2.22457400  | 3.25161200  |
| C | 7.34128300  | 0.14375800  | 0.70438600  |
| C | 5.76823000  | -0.24654200 | -3.34442200 |
| H | 7.23762000  | -0.59496600 | -1.85077700 |
| H | 4.09929700  | 0.20436700  | -4.64551000 |
| C | 7.78141000  | 0.26666600  | 2.00706600  |
| H | 7.39650300  | 1.11315800  | 3.96230500  |
| H | 7.93138300  | -0.44377300 | 0.01014500  |
| H | 6.28635400  | -0.85260800 | -4.08113900 |
| H | 8.70179600  | -0.22163200 | 2.31197700  |
| H | -1.03124100 | -0.68245500 | 2.02986400  |

|   |             |             |             |
|---|-------------|-------------|-------------|
| H | 5.67272200  | -2.60519900 | -1.32925800 |
| C | -3.65978400 | -3.55130700 | -1.50414000 |
| C | -4.03251800 | -3.12770300 | -0.07464200 |
| C | -4.05049700 | -2.44787100 | -2.50010600 |
| C | -4.45007900 | -4.81798800 | -1.84657700 |
| H | -3.71980400 | -3.88416800 | 0.65425400  |
| H | -3.57105100 | -2.17644200 | 0.20852400  |
| H | -5.11671100 | -3.00237300 | 0.00228100  |
| H | -3.77046400 | -2.73093600 | -3.52065300 |
| H | -5.13245700 | -2.28180300 | -2.47127000 |
| H | -3.55740400 | -1.49982600 | -2.26311700 |
| H | -5.51850400 | -4.61862200 | -1.71476400 |
| H | -4.29690000 | -5.12926300 | -2.88496500 |
| H | -4.18008700 | -5.65245100 | -1.19022200 |

**IMIII-1**

|   |             |             |             |
|---|-------------|-------------|-------------|
| C | 5.23762400  | -2.57078000 | 2.73465700  |
| C | 4.62433000  | -3.65707000 | 2.11224900  |
| C | 3.36817900  | -3.51623400 | 1.52066800  |
| C | 2.75251500  | -2.25071100 | 1.53754900  |
| C | 3.34987500  | -1.17624100 | 2.18214700  |
| C | 4.59745100  | -1.33502800 | 2.78742900  |
| H | 3.23853500  | -5.54609600 | 0.66951600  |
| H | 6.21635900  | -2.69246900 | 3.18903600  |
| H | 5.11887100  | -4.62436800 | 2.08761300  |
| C | 2.66802300  | -4.64818000 | 0.89458100  |
| C | 1.46171600  | -2.09446100 | 0.76676500  |
| H | 2.85512600  | -0.20697500 | 2.18412400  |
| H | 5.06874800  | -0.49247100 | 3.28268500  |
| C | 0.65782400  | -3.34654200 | 1.07567300  |
| C | 1.33962000  | -4.60897400 | 0.68647900  |
| H | 0.95014400  | -1.19039100 | 1.09739600  |
| N | -0.42725600 | -3.44491500 | 1.74532600  |
| N | -1.03162900 | -2.32201800 | 2.21983300  |
| C | -1.87262100 | -2.46868000 | 3.29361900  |
| O | -2.26896100 | -3.50743500 | 3.76935400  |
| O | -2.19927000 | -1.24422100 | 3.75320300  |
| C | -3.01565700 | -1.23097900 | 4.92615600  |
| H | -2.51202400 | -1.74704400 | 5.74623300  |
| H | -3.15667000 | -0.17870600 | 5.16973700  |
| H | -3.98250600 | -1.70483500 | 4.74046500  |
| C | 0.51100400  | -5.73226100 | 0.14918300  |
| H | -0.28381900 | -5.98596000 | 0.85787100  |
| H | 0.02361500  | -5.42741700 | -0.78511400 |
| H | 1.12041800  | -6.61867300 | -0.03933100 |
| C | 5.06073700  | -3.07929200 | -2.98143500 |
| C | 5.29178500  | -2.40559500 | -1.77692000 |
| C | 4.25093600  | -1.96572300 | -0.96570100 |
| C | 2.94231300  | -2.27133500 | -1.35040000 |
| C | 2.70637500  | -2.92834800 | -2.57522600 |
| C | 3.76093200  | -3.32535600 | -3.39795900 |
| H | 5.89971700  | -3.39459700 | -3.59370100 |
| H | 4.47493500  | -1.41046500 | -0.06406200 |
| H | 3.55979200  | -3.82758400 | -4.33979500 |
| C | 0.69339700  | -2.48777400 | -1.57791200 |
| C | -0.68392300 | -2.45096000 | -1.39800300 |
| C | -1.50549900 | -3.04406400 | -2.36514700 |
| C | -0.91783100 | -3.63329600 | -3.49793400 |
| C | 0.45842600  | -3.64104500 | -3.68826600 |



|   |             |             |             |
|---|-------------|-------------|-------------|
| C | 1.27310000  | -3.06790100 | -2.71723900 |
| H | -1.11577200 | -1.96361200 | -0.52594900 |
| H | -1.54718600 | -4.08923800 | -4.25303900 |
| H | 0.88979600  | -4.09313700 | -4.57669100 |
| N | 1.69876000  | -1.97583100 | -0.71693500 |
| H | 0.89355900  | -0.05053800 | -0.99627200 |
| C | 0.15747400  | 4.43599100  | -0.78773100 |
| C | 0.49105000  | 5.23371000  | -1.88547700 |
| C | 1.72160500  | 5.08289200  | -2.50971300 |
| C | 2.62331400  | 4.15108900  | -2.00410200 |
| C | 2.29782900  | 3.30050200  | -0.93566700 |
| C | 1.01728600  | 3.42969100  | -0.37984400 |
| C | -1.79659800 | 5.62833600  | -1.36030000 |
| C | -0.63312400 | 6.19436700  | -2.19541700 |
| H | 1.99548200  | 5.70010600  | -3.36012400 |
| H | 3.61540800  | 4.07864100  | -2.43794000 |
| H | -2.32132400 | 4.85697500  | -1.93487800 |
| H | -0.36920500 | 7.21018600  | -1.87739800 |
| C | -1.10662500 | 4.95380600  | -0.14050200 |
| C | -2.07113400 | 4.07179200  | 0.62233800  |
| C | -0.77416600 | 6.01963900  | 0.94269900  |
| C | -2.71158200 | 4.81847300  | 1.61763900  |
| C | -2.45268000 | 2.75689800  | 0.39658600  |
| C | -2.08216300 | 6.18700300  | 1.73410500  |
| H | -0.40431100 | 6.94992300  | 0.50288400  |
| C | -3.77195900 | 4.27885000  | 2.33060700  |
| C | -3.58154300 | 2.22056600  | 1.02688700  |
| H | -1.91480400 | 6.48167100  | 2.77358100  |
| C | -4.21961900 | 3.00357700  | 1.99758800  |
| H | -4.26686900 | 4.84729900  | 3.11240700  |
| H | -5.09470300 | 2.58846200  | 2.48860800  |
| H | -0.86054300 | 6.23751400  | -3.26393700 |
| H | -2.52477600 | 6.38456900  | -1.05385400 |
| H | 0.00479900  | 5.61708800  | 1.59943700  |
| H | -2.73046300 | 6.94626700  | 1.28030400  |
| O | -1.68884800 | 1.97405900  | -0.48479700 |
| O | 0.58345200  | 2.53692100  | 0.60744100  |
| P | -0.36911700 | 1.31208400  | 0.15993300  |
| O | 0.26002600  | 0.68633800  | -1.14473200 |
| O | -0.58835500 | 0.42162000  | 1.31681100  |
| C | -4.28438200 | 0.96800700  | 0.61348900  |
| C | -4.22995800 | -0.16646800 | 1.35710700  |
| C | -5.22190200 | 1.06826400  | -0.49524300 |
| C | -5.12459900 | -1.26889100 | 1.11885800  |

|   |             |             |             |
|---|-------------|-------------|-------------|
| H | -3.52713200 | -0.23938100 | 2.18322600  |
| C | -6.12756700 | 0.00687200  | -0.74917600 |
| C | -5.25912200 | 2.21433400  | -1.32177600 |
| C | -5.07581400 | -2.41921900 | 1.93652600  |
| C | -6.09113100 | -1.18514600 | 0.08823600  |
| C | -7.02806700 | 0.13394200  | -1.82955600 |
| H | -4.57679300 | 3.03399700  | -1.12251700 |
| C | -6.14281400 | 2.30766800  | -2.37481400 |
| C | -5.95681800 | -3.46158900 | 1.74973000  |
| H | -4.32259600 | -2.48284700 | 2.71505400  |
| C | -6.97752800 | -2.27072500 | -0.08858100 |
| C | -7.03633300 | 1.25610900  | -2.63045800 |
| H | -7.72605500 | -0.66544800 | -2.04993900 |
| H | -6.14760100 | 3.19300600  | -3.00261500 |
| C | -6.91628600 | -3.38303200 | 0.72588500  |
| H | -5.90492600 | -4.34029000 | 2.38455800  |
| H | -7.73085000 | -2.23873400 | -0.86749400 |
| H | -7.73548500 | 1.32399900  | -3.45798900 |
| H | -7.61349400 | -4.20072500 | 0.57187500  |
| C | 3.37010500  | 2.47325400  | -0.31385800 |
| C | 3.59400700  | 2.60171400  | 1.02394000  |
| C | 4.32326500  | 1.73806000  | -1.12891300 |
| C | 4.78237400  | 2.10187900  | 1.65233900  |
| H | 2.90069600  | 3.17308100  | 1.63618200  |
| C | 5.55370000  | 1.31335100  | -0.56057400 |
| C | 4.06155900  | 1.45433700  | -2.48902400 |
| C | 4.99045400  | 2.29933000  | 3.03610200  |
| C | 5.78791800  | 1.48735700  | 0.86793000  |
| C | 6.52201200  | 0.73870800  | -1.41273800 |
| H | 3.09180300  | 1.71282900  | -2.90229700 |
| C | 5.01293600  | 0.85961200  | -3.28889100 |
| C | 6.16686300  | 1.90530400  | 3.63548000  |
| H | 4.20803100  | 2.78252900  | 3.61532300  |
| C | 6.97469400  | 1.07326200  | 1.51198500  |
| C | 6.26799100  | 0.53367100  | -2.75210600 |
| H | 7.48673700  | 0.44517600  | -1.01381300 |
| H | 4.79158900  | 0.64536800  | -4.32954300 |
| C | 7.16365700  | 1.28180500  | 2.86318600  |
| H | 6.32338500  | 2.06949300  | 4.69694500  |
| H | 7.75887300  | 0.58256100  | 0.94685800  |
| H | 7.02926700  | 0.08656000  | -3.38417400 |
| H | 8.08843200  | 0.96010100  | 3.33209800  |
| H | -0.72693100 | -1.37439400 | 1.98767100  |
| H | 6.31074000  | -2.19527100 | -1.46856700 |

|   |             |             |             |
|---|-------------|-------------|-------------|
| C | -3.01939400 | -3.00146800 | -2.16877800 |
| C | -3.37825600 | -3.61629700 | -0.80789900 |
| C | -3.47657000 | -1.53536700 | -2.21831300 |
| C | -3.77373500 | -3.77523200 | -3.25496100 |
| H | -3.06604400 | -4.66581300 | -0.76129600 |
| H | -2.89997400 | -3.08714200 | 0.02297100  |
| H | -4.46135700 | -3.57206800 | -0.65084300 |
| H | -3.13966400 | -1.05369800 | -3.14253600 |
| H | -4.56826500 | -1.48458400 | -2.18652100 |
| H | -3.08466800 | -0.95796500 | -1.37276500 |
| H | -4.84620900 | -3.74261300 | -3.03669200 |
| H | -3.62351900 | -3.33753900 | -4.24732800 |
| H | -3.47055800 | -4.82702700 | -3.28949300 |

**IMIII-2**

|   |             |             |             |
|---|-------------|-------------|-------------|
| C | -1.40268000 | 3.79747300  | 3.04102700  |
| C | -1.93859200 | 4.27655700  | 1.84682900  |
| C | -2.17058500 | 3.41199900  | 0.77373900  |
| C | -1.87550900 | 2.04572600  | 0.93202000  |
| C | -1.33996700 | 1.56740400  | 2.12353800  |
| C | -1.09393700 | 2.44572800  | 3.18158900  |
| H | -3.18355900 | 4.87900500  | -0.51297200 |
| H | -1.22100800 | 4.48366200  | 3.86253200  |
| H | -2.17642400 | 5.33208300  | 1.73798800  |
| C | -2.74101100 | 3.88558600  | -0.49417700 |
| C | -2.18529500 | 1.10660800  | -0.21022400 |
| H | -1.13448900 | 0.50343100  | 2.22327900  |
| H | -0.67855800 | 2.07165600  | 4.11207500  |
| C | -1.94709400 | 1.86043100  | -1.51239700 |
| C | -2.65925400 | 3.15590000  | -1.62164800 |
| H | -1.53165100 | 0.23957400  | -0.12205900 |
| N | -1.14366100 | 1.56672700  | -2.46822900 |
| N | -0.31971600 | 0.49746200  | -2.34793700 |
| C | 0.41495100  | 0.11452200  | -3.44121500 |
| O | 0.39987200  | 0.62932900  | -4.53628700 |
| O | 1.13723500  | -0.97110100 | -3.10974400 |
| C | 1.79749100  | -1.60565500 | -4.20400800 |
| H | 2.61579300  | -0.98496700 | -4.57837200 |
| H | 2.17838700  | -2.54676800 | -3.80788200 |
| H | 1.09208600  | -1.79489900 | -5.01708700 |
| C | -3.14296000 | 3.60607600  | -2.96379500 |
| H | -2.33764300 | 3.52877500  | -3.69979600 |
| H | -3.95753000 | 2.95992100  | -3.31021900 |
| H | -3.50210200 | 4.63734800  | -2.92844200 |
| C | -7.07611000 | 0.86249800  | 2.05390400  |
| C | -6.06554000 | 1.79313000  | 2.32885300  |
| C | -4.85380400 | 1.79426500  | 1.64913600  |
| C | -4.64740200 | 0.82657800  | 0.65453200  |
| C | -5.66948200 | -0.11860900 | 0.37569500  |
| C | -6.87876000 | -0.09808200 | 1.07359700  |
| H | -8.00843700 | 0.89552500  | 2.60798600  |
| H | -4.10567700 | 2.52802400  | 1.90831000  |
| H | -7.64884500 | -0.83059400 | 0.84710000  |
| C | -3.87487600 | -0.53388200 | -0.97516900 |
| C | -3.09035400 | -1.18046100 | -1.92797400 |
| C | -3.59685800 | -2.30263700 | -2.58806400 |
| C | -4.88800500 | -2.76256100 | -2.26429700 |
| C | -5.67164100 | -2.11727900 | -1.31240800 |

|   |             |             |             |
|---|-------------|-------------|-------------|
| C | -5.17056000 | -0.99007300 | -0.66288800 |
| H | -2.09755700 | -0.82552100 | -2.17034700 |
| H | -5.29360700 | -3.63443600 | -2.76447100 |
| H | -6.66445800 | -2.49205900 | -1.07789600 |
| N | -3.56165100 | 0.57055900  | -0.18961100 |
| H | 1.29393400  | 1.41540000  | 1.86897100  |
| C | 4.84106500  | -0.26786000 | -0.37867200 |
| C | 6.12128600  | 0.13233000  | 0.01539900  |
| C | 6.37393700  | 1.45493900  | 0.36002100  |
| C | 5.33257200  | 2.38000500  | 0.32454200  |
| C | 4.02849600  | 1.99963500  | -0.01620600 |
| C | 3.81242700  | 0.65956800  | -0.35616600 |
| C | 6.07677000  | -2.24486000 | -0.00854000 |
| C | 7.05512500  | -1.05555500 | 0.02639800  |
| H | 7.36870100  | 1.76678800  | 0.66410700  |
| H | 5.51934300  | 3.41733400  | 0.58723700  |
| H | 5.75060100  | -2.48164900 | 1.01009600  |
| H | 7.70302900  | -1.04658900 | -0.85844400 |
| C | 4.85339400  | -1.72128200 | -0.81419900 |
| C | 3.64118100  | -2.62362100 | -0.66526500 |
| C | 5.11867100  | -1.86154400 | -2.34040100 |
| C | 3.62762400  | -3.58666000 | -1.68164400 |
| C | 2.62512100  | -2.63324700 | 0.27605200  |
| C | 4.74148700  | -3.31690700 | -2.66658000 |
| H | 6.14801400  | -1.60448200 | -2.60501600 |
| C | 2.64632600  | -4.56843000 | -1.71495800 |
| C | 1.62886600  | -3.61855600 | 0.28525800  |
| H | 4.42350100  | -3.45105200 | -3.70477800 |
| C | 1.66749200  | -4.58863100 | -0.72148600 |
| H | 2.63058000  | -5.30870500 | -2.51010500 |
| H | 0.89826100  | -5.35537400 | -0.72844400 |
| H | 7.70483800  | -1.06664700 | 0.90536200  |
| H | 6.50450100  | -3.14932400 | -0.44997800 |
| H | 4.44422800  | -1.18023300 | -2.87158400 |
| H | 5.58546600  | -3.99586300 | -2.49505300 |
| O | 2.54150800  | -1.57453400 | 1.19552800  |
| O | 2.50674000  | 0.23018200  | -0.60804900 |
| P | 1.68360700  | -0.33394900 | 0.65062500  |
| O | 1.89728000  | 0.64926600  | 1.87011400  |
| O | 0.29744000  | -0.61399000 | 0.23052200  |
| C | 0.52280600  | -3.59154000 | 1.28302300  |
| C | -0.75192600 | -3.42242800 | 0.84476900  |
| C | 0.78537600  | -3.71727700 | 2.70488400  |
| C | -1.86284100 | -3.32726400 | 1.74522200  |

|   |             |             |             |
|---|-------------|-------------|-------------|
| H | -0.94550200 | -3.29191100 | -0.21683600 |
| C | -0.28888300 | -3.62311900 | 3.62943400  |
| C | 2.09289900  | -3.94508600 | 3.19060600  |
| C | -3.16642800 | -3.12333300 | 1.24075700  |
| C | -1.64703100 | -3.41065500 | 3.14165800  |
| C | -0.00070200 | -3.75008700 | 5.00668200  |
| H | 2.91078400  | -4.03461900 | 2.48265200  |
| C | 2.34286200  | -4.06735100 | 4.53938800  |
| C | -4.23791500 | -2.99499900 | 2.09626300  |
| H | -3.30798600 | -3.06578900 | 0.16349300  |
| C | -2.76499400 | -3.27928000 | 3.99485900  |
| C | 1.28442000  | -3.96482600 | 5.45638900  |
| H | -0.80115900 | -3.68321100 | 5.73456800  |
| H | 3.35434700  | -4.24460900 | 4.89117500  |
| C | -4.03057800 | -3.07368600 | 3.48471700  |
| H | -5.23425300 | -2.82653400 | 1.69872200  |
| H | -2.64129400 | -3.33200500 | 5.07052000  |
| H | 1.47563300  | -4.05966000 | 6.52072400  |
| H | -4.87135200 | -2.96892300 | 4.16331900  |
| C | 2.91290100  | 2.98691600  | -0.05362300 |
| C | 2.21223700  | 3.15744800  | -1.20860900 |
| C | 2.58581300  | 3.79822600  | 1.10731800  |
| C | 1.22930700  | 4.19027400  | -1.36248500 |
| H | 2.43414500  | 2.53459800  | -2.07250600 |
| C | 1.62873200  | 4.84198000  | 0.98751000  |
| C | 3.17090500  | 3.54304100  | 2.37034900  |
| C | 0.57590000  | 4.36894700  | -2.60260300 |
| C | 0.96520700  | 5.07413000  | -0.28883700 |
| C | 1.33125300  | 5.61319300  | 2.13297500  |
| H | 3.87134000  | 2.72054400  | 2.46956400  |
| C | 2.84778100  | 4.30420700  | 3.47311000  |
| C | -0.29472300 | 5.41895400  | -2.79050700 |
| H | 0.77522300  | 3.66237800  | -3.40411100 |
| C | 0.06210700  | 6.13827900  | -0.50791800 |
| C | 1.92891600  | 5.35808700  | 3.34885400  |
| H | 0.60248400  | 6.41343500  | 2.06934900  |
| H | 3.30241400  | 4.08682300  | 4.43445600  |
| C | -0.54903900 | 6.31081300  | -1.73279200 |
| H | -0.78285900 | 5.55923700  | -3.74969900 |
| H | -0.14929500 | 6.84775900  | 0.28441000  |
| H | 1.67366200  | 5.96268100  | 4.21367800  |
| H | -1.23282600 | 7.14144100  | -1.88008300 |
| H | -0.13436900 | 0.03053700  | -1.45508300 |
| H | -6.22402800 | 2.54104300  | 3.09988400  |

|   |             |             |             |
|---|-------------|-------------|-------------|
| C | -2.72114400 | -2.96576300 | -3.65993600 |
| C | -2.42791100 | -1.94184500 | -4.77019100 |
| C | -1.39103500 | -3.42569800 | -3.03753900 |
| C | -3.40200400 | -4.18350900 | -4.29109700 |
| H | -3.35581400 | -1.59803100 | -5.23920300 |
| H | -1.90589400 | -1.05937600 | -4.38532800 |
| H | -1.80105400 | -2.39435200 | -5.54707400 |
| H | -1.56756000 | -4.17196600 | -2.25490400 |
| H | -0.75614100 | -3.88650900 | -3.80419400 |
| H | -0.82953500 | -2.59240100 | -2.60002800 |
| H | -2.73930400 | -4.62220400 | -5.04383600 |
| H | -3.61836200 | -4.95659900 | -3.54635300 |
| H | -4.33834200 | -3.91225800 | -4.78925400 |

**IMIII-3**

|   |             |             |             |
|---|-------------|-------------|-------------|
| C | 6.38708500  | -1.58670400 | -0.60118500 |
| C | 5.47383900  | -1.54828800 | -1.64531800 |
| C | 4.24827300  | -0.88664800 | -1.48296100 |
| C | 3.92590400  | -0.29786700 | -0.25321100 |
| C | 4.84206600  | -0.34626400 | 0.79206800  |
| C | 6.07155500  | -0.97528600 | 0.61227200  |
| H | 3.63844400  | -1.19743700 | -3.53995200 |
| H | 7.34500600  | -2.07957300 | -0.73221800 |
| H | 5.70417900  | -2.00349300 | -2.60459500 |
| C | 3.36084500  | -0.70335100 | -2.61046600 |
| C | 2.57203300  | 0.36302800  | -0.06517600 |
| H | 4.60266000  | 0.11568200  | 1.74513900  |
| H | 6.78571400  | -0.99137500 | 1.42974900  |
| C | 1.85884600  | 0.70238800  | -1.36531000 |
| C | 2.25809300  | 0.08820600  | -2.61269600 |
| H | 1.89554100  | -0.41235300 | 0.34615600  |
| N | 0.78732900  | 1.45363300  | -1.38860400 |
| N | 0.11362400  | 1.93904100  | -0.29331400 |
| C | 0.40881500  | 3.22376600  | 0.12486700  |
| O | 1.12288700  | 3.98999700  | -0.47840900 |
| O | -0.22184600 | 3.47173400  | 1.27165100  |
| C | 0.05833300  | 4.75534400  | 1.83705300  |
| H | 1.12870700  | 4.85999100  | 2.02560000  |
| H | -0.27197800 | 5.54847100  | 1.16461400  |
| H | -0.50111200 | 4.79206500  | 2.77089900  |
| C | 1.46120400  | 0.34498100  | -3.86046100 |
| H | 0.42144900  | 0.02505500  | -3.72667900 |
| H | 1.47366000  | 1.41058500  | -4.11922200 |
| H | 1.89501100  | -0.20918700 | -4.69410700 |
| C | 5.14361100  | 4.73691900  | 1.11374100  |
| C | 5.19201700  | 3.98027300  | -0.06747300 |
| C | 4.39859300  | 2.85351400  | -0.23884000 |
| C | 3.54854200  | 2.50167300  | 0.80868400  |
| C | 3.48605700  | 3.24798200  | 2.00505300  |
| C | 4.29293800  | 4.37955300  | 2.15183900  |
| H | 5.77699100  | 5.61259900  | 1.21176400  |
| H | 4.43311300  | 2.27594300  | -1.15812100 |
| H | 4.25475500  | 4.96848300  | 3.06386300  |
| C | 1.99156700  | 1.50398400  | 2.11828900  |
| C | 0.93756400  | 0.71490100  | 2.58150700  |
| C | 0.30831000  | 1.07995300  | 3.77184700  |
| C | 0.81055700  | 2.17712000  | 4.50530300  |
| C | 1.88574500  | 2.93159700  | 4.05911600  |



|   |             |             |             |
|---|-------------|-------------|-------------|
| C | 2.47848000  | 2.61428900  | 2.83514300  |
| H | 0.56784700  | -0.11420000 | 1.98622100  |
| H | 0.33319000  | 2.45970000  | 5.43680800  |
| H | 2.23641700  | 3.78162400  | 4.63831200  |
| N | 2.64670200  | 1.44382600  | 0.88686200  |
| H | -0.23783000 | 1.22024300  | 0.34275100  |
| H | 5.86104300  | 4.28203100  | -0.86719900 |
| C | -1.00377100 | 0.40368300  | 4.18908000  |
| C | -2.15242000 | 1.18790300  | 3.52538400  |
| C | -1.08449100 | -1.05488300 | 3.71847100  |
| C | -1.19616600 | 0.42450600  | 5.71224400  |
| H | -2.11967200 | 2.24657500  | 3.80493000  |
| H | -2.09205100 | 1.12014100  | 2.43336600  |
| H | -3.12003100 | 0.77977600  | 3.84138900  |
| H | -0.27058500 | -1.65302400 | 4.14530300  |
| H | -2.03085500 | -1.49003000 | 4.05726400  |
| H | -1.06134400 | -1.14705600 | 2.62582600  |
| H | -2.09379400 | -0.14436600 | 5.97501700  |
| H | -0.34355500 | -0.03017000 | 6.22802600  |
| H | -1.33224800 | 1.43743900  | 6.10169800  |
| C | -3.23402600 | -3.06365500 | 0.97555000  |
| C | -3.35384900 | -3.57522800 | 2.27068900  |
| C | -2.29947600 | -4.26371300 | 2.85840800  |
| C | -1.10849400 | -4.40816600 | 2.15021500  |
| C | -0.93484000 | -3.84271800 | 0.87938800  |
| C | -2.02223700 | -3.16541500 | 0.30597200  |
| C | -5.18178500 | -2.10593100 | 1.89261900  |
| C | -4.70218400 | -3.21324200 | 2.85040500  |
| H | -2.39182800 | -4.67159900 | 3.86108200  |
| H | -0.27828300 | -4.94663400 | 2.59848900  |
| H | -4.76220900 | -1.14331800 | 2.20676500  |
| H | -5.38027000 | -4.07541800 | 2.83547400  |
| C | -4.56141700 | -2.48845700 | 0.51862400  |
| C | -4.66355600 | -1.36086500 | -0.49360100 |
| C | -5.44514800 | -3.56670300 | -0.17219600 |
| C | -5.85297400 | -1.47735200 | -1.22270200 |
| C | -3.80797600 | -0.29464500 | -0.74606000 |
| C | -6.55950500 | -2.76466100 | -0.86606700 |
| H | -5.81801200 | -4.31105500 | 0.53725300  |
| C | -6.22099700 | -0.50788000 | -2.14593900 |
| C | -4.16675600 | 0.70446800  | -1.66247700 |
| H | -6.96929700 | -3.27334000 | -1.74302100 |
| C | -5.38086100 | 0.58697800  | -2.34461200 |
| H | -7.14285900 | -0.60190900 | -2.71279800 |

|   |             |             |             |
|---|-------------|-------------|-------------|
| H | -5.65293300 | 1.36222400  | -3.05530800 |
| H | -4.63139000 | -2.87560800 | 3.88863600  |
| H | -6.27034500 | -2.00821000 | 1.84431100  |
| H | -4.84095000 | -4.08318200 | -0.92594900 |
| H | -7.39466500 | -2.57233400 | -0.18093500 |
| O | -2.58531900 | -0.22943600 | -0.11181600 |
| O | -1.87759300 | -2.53994300 | -0.91345000 |
| P | -1.31502600 | -0.99367000 | -0.85690500 |
| O | -0.20891200 | -0.85913800 | 0.14913300  |
| O | -1.15642100 | -0.55982500 | -2.27158900 |
| C | -3.27070200 | 1.86821600  | -1.91947700 |
| C | -2.57089900 | 1.93380200  | -3.08092600 |
| C | -3.18734400 | 2.95549900  | -0.96369200 |
| C | -1.69141300 | 3.02815300  | -3.37882800 |
| H | -2.62949700 | 1.11183600  | -3.78780700 |
| C | -2.38945700 | 4.09252500  | -1.25944800 |
| C | -3.91145100 | 2.92013300  | 0.24839500  |
| C | -0.91666800 | 3.02137300  | -4.56180800 |
| C | -1.57947000 | 4.10858600  | -2.47045400 |
| C | -2.41083800 | 5.17997200  | -0.36083100 |
| H | -4.50550500 | 2.04192500  | 0.48176000  |
| C | -3.88091800 | 3.98152100  | 1.12802500  |
| C | -0.04314400 | 4.05114600  | -4.83801600 |
| H | -1.02268000 | 2.18487700  | -5.24816900 |
| C | -0.66677800 | 5.14290300  | -2.77268400 |
| C | -3.13997900 | 5.13044300  | 0.80944000  |
| H | -1.85392100 | 6.08134100  | -0.59271200 |
| H | -4.44345100 | 3.93471400  | 2.05540200  |
| C | 0.08399300  | 5.11673200  | -3.92911400 |
| H | 0.54964400  | 4.03788700  | -5.74745000 |
| H | -0.52134100 | 5.96059400  | -2.07635900 |
| H | -3.13666300 | 5.98161100  | 1.48384100  |
| H | 0.78523000  | 5.91994500  | -4.13212300 |
| C | 0.35345200  | -3.98076900 | 0.14472800  |
| C | 0.36278500  | -4.48118900 | -1.12023800 |
| C | 1.61541700  | -3.65500300 | 0.78664700  |
| C | 1.57989400  | -4.71565000 | -1.84220600 |
| H | -0.57543400 | -4.72270200 | -1.61215500 |
| C | 2.84177400  | -3.97924600 | 0.14939500  |
| C | 1.65033100  | -2.99820600 | 2.03708000  |
| C | 1.53915600  | -5.18990900 | -3.17201800 |
| C | 2.82839900  | -4.49212800 | -1.21348000 |
| C | 4.04349500  | -3.77252900 | 0.86204500  |
| H | 0.71653100  | -2.66754900 | 2.47475100  |

|   |            |             |             |
|---|------------|-------------|-------------|
| C | 2.84073200 | -2.76399700 | 2.69112500  |
| C | 2.70050800 | -5.42792500 | -3.87318400 |
| H | 0.56956900 | -5.35655800 | -3.63355700 |
| C | 4.00437600 | -4.74351600 | -1.95471700 |
| C | 4.04570900 | -3.19697200 | 2.11447400  |
| H | 4.99052500 | -4.06170300 | 0.42068100  |
| H | 2.84213600 | -2.25139400 | 3.64874700  |
| C | 3.94362800 | -5.19925100 | -3.25614400 |
| H | 2.65864100 | -5.78767700 | -4.89645600 |
| H | 4.97730700 | -4.56786500 | -1.50871800 |
| H | 4.98573900 | -3.04611800 | 2.63657300  |
| H | 4.86211100 | -5.38395600 | -3.80505600 |
| H | 0.25966400 | 1.52666900  | -2.26000800 |

**TSIII-2**Value of imaginary frequency = -1140.8 cm<sup>-1</sup>

|   |             |             |             |
|---|-------------|-------------|-------------|
| C | -4.81605100 | -3.50781100 | -0.70358200 |
| C | -4.09303200 | -3.10676900 | -1.80749100 |
| C | -2.75276900 | -2.69783200 | -1.66312600 |
| C | -2.15624600 | -2.66502500 | -0.39046100 |
| C | -2.90766000 | -3.05814800 | 0.72508600  |
| C | -4.21392800 | -3.48741800 | 0.56357300  |
| H | -2.43761200 | -2.40439300 | -3.78249100 |
| H | -5.84480800 | -3.83710600 | -0.81175300 |
| H | -4.53798900 | -3.10982300 | -2.79890500 |
| C | -1.94885300 | -2.38964200 | -2.81013900 |
| C | -0.75347600 | -2.20258400 | -0.24333200 |
| H | -2.45603800 | -3.03768500 | 1.71229700  |
| H | -4.78215700 | -3.80000700 | 1.43367900  |
| C | 0.01730800  | -2.03983400 | -1.47312000 |
| C | -0.62026100 | -2.09598700 | -2.76308600 |
| H | -0.86458400 | -0.92019800 | -0.09995800 |
| N | 1.29185500  | -1.65287400 | -1.44528400 |
| N | 1.92850100  | -1.25164000 | -0.30256400 |
| C | 2.77797300  | -2.11792600 | 0.34715000  |
| O | 2.95931900  | -3.27147300 | 0.03366600  |
| O | 3.32714300  | -1.48922100 | 1.38824400  |
| C | 4.12005300  | -2.32190200 | 2.23516900  |
| H | 3.52980000  | -3.17020000 | 2.58899500  |
| H | 5.00151900  | -2.68373300 | 1.70049700  |
| H | 4.41865200  | -1.69150800 | 3.07208400  |
| C | 0.17059700  | -1.78148000 | -3.99900200 |
| H | 0.54540200  | -0.75264500 | -3.94140200 |
| H | 1.01916500  | -2.46404900 | -4.12082000 |
| H | -0.46361100 | -1.86747600 | -4.88292500 |
| C | 0.59715800  | -6.83116400 | 1.60170400  |
| C | 0.08988500  | -6.48440400 | 0.33996200  |
| C | -0.17262000 | -5.16252200 | 0.00198700  |
| C | 0.09051500  | -4.18840500 | 0.96479600  |
| C | 0.59369200  | -4.51863700 | 2.24075900  |
| C | 0.85199600  | -5.85456800 | 2.55614200  |
| H | 0.79229800  | -7.87383900 | 1.83078000  |
| H | -0.56322200 | -4.89874100 | -0.97688300 |
| H | 1.24380400  | -6.12387700 | 3.53301800  |
| C | 0.31069500  | -2.24031700 | 2.08816500  |
| C | 0.38446700  | -0.89699800 | 2.44932900  |
| C | 0.90253600  | -0.56003300 | 3.69907000  |
| C | 1.30534600  | -1.58516900 | 4.57936600  |

|   |             |             |             |
|---|-------------|-------------|-------------|
| C | 1.22456900  | -2.92487600 | 4.22108800  |
| C | 0.73839700  | -3.26735200 | 2.95817500  |
| H | 0.09209000  | -0.12653200 | 1.74665300  |
| H | 1.69800500  | -1.33431200 | 5.55824900  |
| H | 1.55561200  | -3.69694100 | 4.91056800  |
| N | -0.07824300 | -2.80945300 | 0.87559200  |
| H | 1.93905700  | -0.25516500 | -0.09478100 |
| H | -0.10069900 | -7.26464000 | -0.39043000 |
| C | 1.11341900  | 0.92351000  | 4.02326100  |
| C | 2.30268500  | 1.42374700  | 3.18268500  |
| C | -0.13038800 | 1.75043100  | 3.65820200  |
| C | 1.42720000  | 1.15389600  | 5.50544900  |
| H | 3.19955300  | 0.82634800  | 3.37996200  |
| H | 2.07937300  | 1.35735500  | 2.11202300  |
| H | 2.52674200  | 2.47045100  | 3.42432100  |
| H | -1.00854100 | 1.41496800  | 4.22149700  |
| H | 0.04628100  | 2.80412500  | 3.90377600  |
| H | -0.36625400 | 1.70163900  | 2.58846100  |
| H | 1.51170600  | 2.22822800  | 5.69866300  |
| H | 0.63754200  | 0.75569500  | 6.15162900  |
| H | 2.37600100  | 0.69348100  | 5.79854400  |
| C | -0.93746800 | 4.16162800  | 0.80296600  |
| C | -1.31490200 | 4.61456000  | 2.07020300  |
| C | -2.49603700 | 4.17169900  | 2.64827000  |
| C | -3.27515400 | 3.24622900  | 1.95990100  |
| C | -2.88467500 | 2.71238400  | 0.72202100  |
| C | -1.69686100 | 3.20095700  | 0.15250400  |
| C | 0.93598000  | 5.26884600  | 1.70331100  |
| C | -0.26282100 | 5.54403400  | 2.62862400  |
| H | -2.80929200 | 4.52930000  | 3.62494400  |
| H | -4.20915300 | 2.90772600  | 2.39695300  |
| H | 1.48476400  | 4.39121000  | 2.06559000  |
| H | -0.58738100 | 6.58978000  | 2.56305300  |
| C | 0.29200500  | 4.90969100  | 0.33378200  |
| C | 1.31268300  | 4.32073700  | -0.62402100 |
| C | -0.09362100 | 6.21124000  | -0.42391400 |
| C | 1.91293700  | 5.35362900  | -1.35596600 |
| C | 1.74139000  | 3.01018400  | -0.81220700 |
| C | 1.21393100  | 6.66648900  | -1.09072100 |
| H | -0.53301400 | 6.95994700  | 0.24112300  |
| C | 2.98274800  | 5.10321200  | -2.20255100 |
| C | 2.84462800  | 2.74009400  | -1.63389000 |
| H | 1.04805400  | 7.23951900  | -2.00715100 |
| C | 3.45744100  | 3.79925700  | -2.31131300 |

|   |             |             |             |
|---|-------------|-------------|-------------|
| H | 3.44311300  | 5.90636700  | -2.77052800 |
| H | 4.30960600  | 3.57809800  | -2.94721500 |
| H | -0.04407900 | 5.33895400  | 3.68085300  |
| H | 1.63516800  | 6.10639700  | 1.62694000  |
| H | -0.83166600 | 5.95992800  | -1.19339400 |
| H | 1.80994000  | 7.29427200  | -0.41703000 |
| O | 1.05594700  | 1.96171900  | -0.20822100 |
| O | -1.23899800 | 2.71828100  | -1.06451900 |
| P | -0.27691900 | 1.40205500  | -1.02202000 |
| O | -0.88323400 | 0.42436800  | -0.02690800 |
| O | 0.05637500  | 1.00624000  | -2.40959400 |
| C | 3.42440500  | 1.37553900  | -1.79805000 |
| C | 3.19957200  | 0.67842600  | -2.94256000 |
| C | 4.35882900  | 0.86571400  | -0.80917700 |
| C | 3.83301800  | -0.58578100 | -3.19895100 |
| H | 2.51106300  | 1.07607300  | -3.68341200 |
| C | 5.03183100  | -0.36263300 | -1.04592200 |
| C | 4.63249900  | 1.58212400  | 0.37661700  |
| C | 3.56166400  | -1.29342800 | -4.39261100 |
| C | 4.72229100  | -1.13447400 | -2.24271200 |
| C | 5.99812500  | -0.79177200 | -0.11235400 |
| H | 4.10861200  | 2.51500300  | 0.56327300  |
| C | 5.56222600  | 1.12310700  | 1.28644700  |
| C | 4.12705200  | -2.52853400 | -4.62447200 |
| H | 2.89405700  | -0.84383600 | -5.12329600 |
| C | 5.26860800  | -2.41184800 | -2.49578200 |
| C | 6.26329200  | -0.06510200 | 1.02986300  |
| H | 6.55633700  | -1.70360200 | -0.29350400 |
| H | 5.76260900  | 1.69049600  | 2.19015700  |
| C | 4.97699600  | -3.09488400 | -3.65822800 |
| H | 3.91133700  | -3.06568900 | -5.54268500 |
| H | 5.91636900  | -2.88142700 | -1.76448300 |
| H | 7.01342600  | -0.41765600 | 1.73129100  |
| H | 5.40631900  | -4.07772000 | -3.82458700 |
| C | -3.76579200 | 1.73278800  | 0.02885400  |
| C | -4.08100000 | 1.91522100  | -1.28271200 |
| C | -4.41680500 | 0.66248500  | 0.77237900  |
| C | -5.06088800 | 1.11246300  | -1.95403300 |
| H | -3.60710000 | 2.71369500  | -1.84622000 |
| C | -5.49980000 | -0.04246300 | 0.18460000  |
| C | -4.00236300 | 0.30280800  | 2.07613200  |
| C | -5.31849400 | 1.30360800  | -3.32954100 |
| C | -5.80883000 | 0.15783800  | -1.22479400 |
| C | -6.23583800 | -0.93881800 | 0.99106200  |

|   |             |             |             |
|---|-------------|-------------|-------------|
| H | -3.10551700 | 0.75537600  | 2.48606700  |
| C | -4.71278500 | -0.60960700 | 2.82662500  |
| C | -6.28329300 | 0.56421100  | -3.97668000 |
| H | -4.73612800 | 2.04625600  | -3.86822600 |
| C | -6.79309200 | -0.58622100 | -1.91189700 |
| C | -5.87095900 | -1.19826400 | 2.29467300  |
| H | -7.10710500 | -1.43872700 | 0.58219900  |
| H | -4.37919500 | -0.86562500 | 3.82746900  |
| C | -7.02577000 | -0.38981000 | -3.25796300 |
| H | -6.47157300 | 0.71562400  | -5.03495200 |
| H | -7.37206000 | -1.33792600 | -1.38656800 |
| H | -6.45918200 | -1.88553900 | 2.89539800  |
| H | -7.78629400 | -0.97655800 | -3.76397000 |
| H | 1.76677800  | -1.44558500 | -2.32023600 |

**IMIII-4**

|   |             |             |             |
|---|-------------|-------------|-------------|
| C | -5.45382700 | 3.63249500  | -0.13539500 |
| C | -4.61541000 | 3.41330300  | -1.20061100 |
| C | -3.75292400 | 2.28841300  | -1.22210600 |
| C | -3.73787100 | 1.38974900  | -0.12498900 |
| C | -4.58687000 | 1.66202800  | 0.98155800  |
| C | -5.42988800 | 2.74759100  | 0.96640800  |
| H | -2.98128900 | 2.66180100  | -3.20504700 |
| H | -6.12931200 | 4.48241200  | -0.13304200 |
| H | -4.61436300 | 4.08229700  | -2.05775700 |
| C | -2.95689900 | 1.98194000  | -2.35638300 |
| C | -2.94133400 | 0.19911300  | -0.19885200 |
| H | -4.57646300 | 0.99598800  | 1.83809400  |
| H | -6.08325700 | 2.92974100  | 1.81447900  |
| C | -2.17434200 | -0.07592900 | -1.32675400 |
| C | -2.20084100 | 0.84464100  | -2.44068000 |
| H | -0.19751800 | 1.57362100  | -0.48562400 |
| N | -1.42444600 | -1.23172200 | -1.52028100 |
| N | -0.89598300 | -1.95482500 | -0.48179800 |
| C | -1.53343400 | -3.08741200 | -0.04485900 |
| O | -2.50092600 | -3.60030600 | -0.56015900 |
| O | -0.90856500 | -3.55370600 | 1.05022200  |
| C | -1.55366300 | -4.66878600 | 1.66146100  |
| H | -2.56367700 | -4.39749600 | 1.97750400  |
| H | -1.60766600 | -5.51222400 | 0.97088000  |
| H | -0.94355400 | -4.92856700 | 2.52650400  |
| C | -1.48072200 | 0.50496800  | -3.71912200 |
| H | -0.40248200 | 0.38888400  | -3.56853100 |
| H | -1.86721400 | -0.42857500 | -4.14461100 |
| H | -1.63479100 | 1.29851300  | -4.45296300 |
| C | -6.59673500 | -3.02152100 | 1.46020700  |
| C | -6.51196700 | -2.30933100 | 0.25206800  |
| C | -5.40672400 | -1.52677300 | -0.05443900 |
| C | -4.37629000 | -1.47500700 | 0.88466700  |
| C | -4.44644100 | -2.17645000 | 2.10574800  |
| C | -5.56781400 | -2.96185000 | 2.39015300  |
| H | -7.47590400 | -3.62370900 | 1.66518200  |
| H | -5.33728300 | -0.98108000 | -0.98989000 |
| H | -5.63209300 | -3.51137200 | 3.32509000  |
| C | -2.46390900 | -1.01380800 | 1.99470500  |
| C | -1.17665400 | -0.60305200 | 2.34646600  |
| C | -0.59058500 | -1.14054900 | 3.49445900  |
| C | -1.34965400 | -2.00157800 | 4.31601200  |
| C | -2.64742100 | -2.36693100 | 3.99218400  |



|   |             |             |             |
|---|-------------|-------------|-------------|
| C | -3.21152100 | -1.89418700 | 2.80710100  |
| H | -0.62749000 | 0.07033000  | 1.69591000  |
| H | -0.90999200 | -2.40792300 | 5.21934800  |
| H | -3.20394100 | -3.04335400 | 4.63542800  |
| N | -3.17369000 | -0.77417000 | 0.81930600  |
| H | -0.19624000 | -1.52549600 | 0.11619500  |
| H | -7.32823100 | -2.37227400 | -0.46089300 |
| C | 0.90637900  | -0.93814900 | 3.75789900  |
| C | 1.65828700  | -1.94859900 | 2.87010700  |
| C | 1.37081400  | 0.47825600  | 3.39740300  |
| C | 1.28154000  | -1.19846700 | 5.22331400  |
| H | 1.34984700  | -2.97408700 | 3.09888800  |
| H | 1.45615600  | -1.76630900 | 1.80964500  |
| H | 2.74079800  | -1.87015800 | 3.03168000  |
| H | 0.82386100  | 1.23207900  | 3.97528600  |
| H | 2.43499300  | 0.58146400  | 3.63333200  |
| H | 1.25539600  | 0.69940200  | 2.33065900  |
| H | 2.34052400  | -0.96475400 | 5.37488500  |
| H | 0.69633700  | -0.57424700 | 5.90684500  |
| H | 1.14018900  | -2.24526800 | 5.50651700  |
| C | 4.07658600  | 1.82180500  | 1.16922500  |
| C | 4.30468500  | 2.21708200  | 2.49119300  |
| C | 3.56357800  | 3.24400500  | 3.06184200  |
| C | 2.55700600  | 3.84888300  | 2.31456700  |
| C | 2.26049800  | 3.43345100  | 1.00941700  |
| C | 3.05002600  | 2.41824500  | 0.45536000  |
| C | 5.40539000  | 0.14347200  | 2.15310900  |
| C | 5.35372400  | 1.33502600  | 3.12592000  |
| H | 3.74421900  | 3.55477700  | 4.08655400  |
| H | 1.96070100  | 4.64390200  | 2.75234300  |
| H | 4.61474000  | -0.57157900 | 2.40698600  |
| H | 6.32024400  | 1.85006900  | 3.18119900  |
| C | 5.08169500  | 0.76278100  | 0.76210300  |
| C | 4.78329400  | -0.31259100 | -0.27029000 |
| C | 6.37116500  | 1.38491500  | 0.15643000  |
| C | 5.97835700  | -0.71486700 | -0.88131700 |
| C | 3.60136900  | -0.94545400 | -0.63480700 |
| C | 7.11450100  | 0.18831800  | -0.46168500 |
| H | 6.95671200  | 1.92559000  | 0.90482600  |
| C | 6.00475700  | -1.78499300 | -1.76445300 |
| C | 3.59627300  | -2.03123900 | -1.51754300 |
| H | 7.74866900  | 0.47180500  | -1.30570700 |
| C | 4.81696000  | -2.45255100 | -2.05364100 |
| H | 6.93436500  | -2.09219600 | -2.23422200 |

|   |             |             |             |
|---|-------------|-------------|-------------|
| H | 4.81546500  | -3.29757700 | -2.73554300 |
| H | 5.08379800  | 1.04034400  | 4.14419800  |
| H | 6.36192400  | -0.38570100 | 2.15729500  |
| H | 6.08433800  | 2.08934300  | -0.63144800 |
| H | 7.75583700  | -0.30854400 | 0.27586700  |
| O | 2.37444300  | -0.45689800 | -0.15829800 |
| O | 2.77378500  | 1.96647200  | -0.83567500 |
| P | 1.74689800  | 0.74630700  | -1.02506100 |
| O | 0.48911400  | 1.00605300  | -0.08859700 |
| O | 1.49965800  | 0.52020000  | -2.45550400 |
| C | 2.34301900  | -2.74662300 | -1.90072400 |
| C | 1.69852800  | -2.41378600 | -3.04827900 |
| C | 1.88779500  | -3.87415400 | -1.11124600 |
| C | 0.52691700  | -3.11656800 | -3.49013100 |
| H | 2.05422100  | -1.57817800 | -3.64260900 |
| C | 0.77483500  | -4.63631500 | -1.55486300 |
| C | 2.55441000  | -4.24979300 | 0.07526100  |
| C | -0.15189700 | -2.70313900 | -4.65868900 |
| C | 0.04226100  | -4.21643700 | -2.74258600 |
| C | 0.41876300  | -5.78883000 | -0.82342100 |
| H | 3.39201800  | -3.65103900 | 0.42046700  |
| C | 2.16636900  | -5.36644200 | 0.78545100  |
| C | -1.29831500 | -3.34742500 | -5.07032500 |
| H | 0.24554300  | -1.86228500 | -5.22169400 |
| C | -1.14365600 | -4.84640100 | -3.17816800 |
| C | 1.10257700  | -6.15363700 | 0.31850600  |
| H | -0.40230700 | -6.41106300 | -1.16226000 |
| H | 2.69365600  | -5.64263800 | 1.69326600  |
| C | -1.79969200 | -4.42189300 | -4.31464300 |
| H | -1.81871800 | -3.02208700 | -5.96562200 |
| H | -1.57090700 | -5.65867700 | -2.60231700 |
| H | 0.80923500  | -7.04715800 | 0.86113600  |
| H | -2.71526500 | -4.91707600 | -4.62147000 |
| C | 1.14529800  | 4.05981400  | 0.24751900  |
| C | 1.37691400  | 4.61670100  | -0.97215200 |
| C | -0.18612300 | 4.12908900  | 0.82714800  |
| C | 0.35334000  | 5.31021500  | -1.69982900 |
| H | 2.36898500  | 4.56295500  | -1.41275200 |
| C | -1.19735900 | 4.88488800  | 0.17831700  |
| C | -0.50723200 | 3.43262900  | 2.01581800  |
| C | 0.62891000  | 5.85062500  | -2.97561900 |
| C | -0.93066700 | 5.47495200  | -1.12649100 |
| C | -2.44935800 | 5.01708300  | 0.81930100  |
| H | 0.24047500  | 2.79202300  | 2.46735400  |

|   |             |             |             |
|---|-------------|-------------|-------------|
| C | -1.75099400 | 3.54495000  | 2.59593000  |
| C | -0.34062900 | 6.53215500  | -3.67649000 |
| H | 1.62222200  | 5.71385000  | -3.39422700 |
| C | -1.90719300 | 6.17746500  | -1.86757500 |
| C | -2.71870100 | 4.37642300  | 2.00942900  |
| H | -3.22531000 | 5.62484900  | 0.36986200  |
| H | -1.97909600 | 2.99055500  | 3.50114900  |
| C | -1.61983900 | 6.69385100  | -3.11428800 |
| H | -0.12194400 | 6.94157700  | -4.65744000 |
| H | -2.90432400 | 6.31242300  | -1.46401500 |
| H | -3.69086600 | 4.49301000  | 2.47634800  |
| H | -2.38819700 | 7.22777500  | -3.66453800 |
| H | -0.82904500 | -1.24159900 | -2.33949400 |

**DIV**

|   |             |             |             |
|---|-------------|-------------|-------------|
| C | 4.32652400  | 4.05462600  | 2.30119700  |
| C | 4.72266000  | 4.03762900  | 0.98569200  |
| C | 4.11661200  | 3.14399300  | 0.06629100  |
| C | 3.09676900  | 2.27125700  | 0.54108500  |
| C | 2.71306300  | 2.29733300  | 1.90872200  |
| C | 3.31477600  | 3.17891900  | 2.76914400  |
| H | 5.29814800  | 3.73503100  | -1.64723600 |
| H | 4.79412500  | 4.74580700  | 2.99606700  |
| H | 5.50101200  | 4.70814100  | 0.63212600  |
| C | 4.50673600  | 3.07491300  | -1.30039500 |
| C | 2.49254000  | 1.37745800  | -0.36480000 |
| H | 1.94074800  | 1.60652900  | 2.24234300  |
| H | 3.02556400  | 3.20295900  | 3.81507600  |
| C | 2.87788300  | 1.35786000  | -1.69004400 |
| C | 3.92456100  | 2.19921700  | -2.18228800 |
| H | 1.77933800  | 0.65538000  | 0.02286600  |
| N | 2.34144400  | 0.41346400  | -2.58959000 |
| N | 1.18504800  | 0.03592600  | -2.32111400 |
| C | 0.72210800  | -1.04994500 | -3.15197800 |
| O | 1.40945600  | -1.91863400 | -3.61988300 |
| O | -0.59263500 | -0.94467200 | -3.23484900 |
| C | -1.25796200 | -2.02921300 | -3.89407600 |
| H | -1.03989600 | -2.96494800 | -3.37428600 |
| H | -2.32008300 | -1.79577200 | -3.84096900 |
| H | -0.92744800 | -2.09957800 | -4.93262800 |
| C | 4.34041400  | 2.11812400  | -3.62382900 |
| H | 4.58657100  | 1.08746100  | -3.89606500 |
| H | 3.53339100  | 2.44394000  | -4.28786200 |
| H | 5.21180700  | 2.75015200  | -3.80643700 |
| C | -1.30278900 | -3.53525400 | 0.79725500  |
| C | -1.24669600 | -4.51096200 | 1.79636800  |
| C | -0.06040000 | -4.75381900 | 2.47781100  |
| C | 1.06946400  | -4.00271800 | 2.16104000  |
| C | 1.02667700  | -2.97612700 | 1.20890600  |
| C | -0.18577000 | -2.75175500 | 0.54680500  |
| C | -3.53459900 | -4.14503900 | 1.25891300  |
| C | -2.60898100 | -5.13809400 | 1.98739600  |
| H | -0.01041000 | -5.51205300 | 3.25389600  |
| H | 2.00612600  | -4.18755000 | 2.67928000  |
| H | -3.80525700 | -3.32787200 | 1.93672800  |
| H | -2.64885200 | -6.13216200 | 1.52582100  |
| C | -2.65560100 | -3.56841300 | 0.11313300  |
| C | -3.28095500 | -2.34183300 | -0.52725000 |

|   |             |             |             |
|---|-------------|-------------|-------------|
| C | -2.64988400 | -4.55236900 | -1.09225800 |
| C | -4.07157500 | -2.71900200 | -1.61935400 |
| C | -3.21957200 | -1.00202700 | -0.17123600 |
| C | -3.90927200 | -4.19429200 | -1.90062100 |
| H | -2.62243300 | -5.59621700 | -0.76794500 |
| C | -4.83971700 | -1.78169500 | -2.29830300 |
| C | -3.99876200 | -0.03504900 | -0.82050500 |
| H | -3.80101600 | -4.40387400 | -2.96903500 |
| C | -4.81089400 | -0.45197700 | -1.88111800 |
| H | -5.45347700 | -2.07597100 | -3.14487500 |
| H | -5.41776900 | 0.29256100  | -2.38769600 |
| H | -2.86461200 | -5.25999100 | 3.04335500  |
| H | -4.45554600 | -4.59915100 | 0.88178500  |
| H | -1.75454800 | -4.36292000 | -1.69395400 |
| H | -4.78361300 | -4.75418700 | -1.54733900 |
| O | -2.34977200 | -0.60075800 | 0.84137700  |
| O | -0.31928500 | -1.65757100 | -0.31243900 |
| P | -0.81269100 | -0.30629700 | 0.45484400  |
| O | -0.02574000 | 0.03376400  | 1.65208600  |
| O | -0.87158200 | 0.71335200  | -0.73265100 |
| C | -3.94817100 | 1.40314700  | -0.43823100 |
| C | -3.57001700 | 2.31593600  | -1.37129200 |
| C | -4.32615900 | 1.84698500  | 0.89199600  |
| C | -3.49849900 | 3.71868400  | -1.08386800 |
| H | -3.27423500 | 1.97964700  | -2.36205900 |
| C | -4.26274000 | 3.22806200  | 1.21625600  |
| C | -4.78435400 | 0.93390600  | 1.86855900  |
| C | -3.08419000 | 4.62949400  | -2.08043000 |
| C | -3.83121800 | 4.18921700  | 0.20857600  |
| C | -4.63913800 | 3.63121800  | 2.51695700  |
| H | -4.85635000 | -0.11896200 | 1.61637300  |
| C | -5.14836900 | 1.35657000  | 3.12744700  |
| C | -2.99869500 | 5.97720300  | -1.81254200 |
| H | -2.82986900 | 4.24328900  | -3.06397500 |
| C | -3.73198900 | 5.57614500  | 0.45679700  |
| C | -5.06858000 | 2.71924400  | 3.45626600  |
| H | -4.59639700 | 4.67890900  | 2.79123000  |
| H | -5.49824200 | 0.63792000  | 3.86177600  |
| C | -3.32642700 | 6.45065700  | -0.52989000 |
| H | -2.67714500 | 6.67061800  | -2.58323400 |
| H | -3.97276300 | 5.97475000  | 1.43563500  |
| H | -5.35164400 | 3.05732500  | 4.44813500  |
| H | -3.25795800 | 7.51185200  | -0.31168900 |
| C | 2.25173500  | -2.19154000 | 0.88671900  |

|   |             |             |             |
|---|-------------|-------------|-------------|
| C | 2.75477900  | -2.23764300 | -0.37721600 |
| C | 2.96077300  | -1.45411300 | 1.91788900  |
| C | 3.99782600  | -1.61272200 | -0.72488200 |
| H | 2.22710100  | -2.78814600 | -1.15355400 |
| C | 4.21011900  | -0.84915100 | 1.61878600  |
| C | 2.41894900  | -1.30856700 | 3.21589100  |
| C | 4.47499000  | -1.67845500 | -2.05203200 |
| C | 4.73602000  | -0.91412900 | 0.26074400  |
| C | 4.89987800  | -0.18320300 | 2.65671600  |
| H | 1.43354300  | -1.71172600 | 3.42033200  |
| C | 3.10995700  | -0.64313500 | 4.20484900  |
| C | 5.65457800  | -1.05926800 | -2.40517400 |
| H | 3.87851500  | -2.20405400 | -2.79260300 |
| C | 5.93016300  | -0.27227900 | -0.13417100 |
| C | 4.37180900  | -0.09297300 | 3.92651500  |
| H | 5.86073900  | 0.27857500  | 2.45997100  |
| H | 2.67589100  | -0.53979600 | 5.19440700  |
| C | 6.38034100  | -0.34326300 | -1.43738500 |
| H | 6.01704700  | -1.11398500 | -3.42720900 |
| H | 6.50911700  | 0.29684600  | 0.58434500  |
| H | 4.92239500  | 0.42698700  | 4.70451500  |
| H | 7.29912600  | 0.16410400  | -1.71566900 |
| H | -0.08373900 | 0.59835900  | -1.34990100 |

**DIV<sub>R2</sub>**

|   |             |             |             |
|---|-------------|-------------|-------------|
| C | -2.26420700 | -0.10430500 | 4.50228900  |
| C | -1.10975100 | -0.44337900 | 3.75340500  |
| C | -0.88631200 | 0.18029000  | 2.53054200  |
| C | -1.82288800 | 1.11651000  | 2.07784700  |
| C | -2.96195200 | 1.47020900  | 2.83123100  |
| C | -3.17588300 | 0.84063500  | 4.06230300  |
| H | -2.44231500 | -0.59835500 | 5.45296400  |
| H | -0.02916100 | -0.05082400 | 1.90744500  |
| H | -4.05150000 | 1.07922500  | 4.66040000  |
| C | -2.98634100 | 2.56247400  | 0.81527100  |
| C | -3.46544900 | 3.35941600  | -0.22771600 |
| C | -4.68786200 | 3.99385600  | -0.04522200 |
| C | -5.42494600 | 3.84265000  | 1.14189400  |
| C | -4.94524100 | 3.04956700  | 2.17684300  |
| C | -3.71579700 | 2.40298800  | 2.02154500  |
| H | -2.90843200 | 3.46543000  | -1.15355900 |
| H | -5.08510900 | 4.61430900  | -0.84347200 |
| H | -6.37824100 | 4.35065700  | 1.24784600  |
| H | -5.51850800 | 2.92779600  | 3.09204700  |
| N | -1.84838400 | 1.79143700  | 0.87793400  |
| H | -1.10617700 | 1.72611900  | 0.18890700  |
| C | -0.16314700 | -1.51691500 | 4.29808800  |
| C | -0.89356300 | -2.86991800 | 4.30510800  |
| C | 1.09926500  | -1.65648400 | 3.44418100  |
| C | 0.26841800  | -1.16184100 | 5.73042300  |
| H | -1.80395000 | -2.83508300 | 4.91192400  |
| H | -1.17579800 | -3.15962600 | 3.28688900  |
| H | -0.24443300 | -3.65261700 | 4.71486300  |
| H | 1.68144900  | -0.72838900 | 3.43133800  |
| H | 1.73860100  | -2.44196900 | 3.86182600  |
| H | 0.87030100  | -1.92664100 | 2.40723900  |
| H | 0.97668400  | -1.90840900 | 6.10656300  |
| H | 0.75931500  | -0.18327500 | 5.75755500  |
| H | -0.57971600 | -1.13382400 | 6.42038800  |
| C | 2.88754300  | -2.46283400 | 0.18110500  |
| C | 3.50476600  | -2.79573000 | 1.39146600  |
| C | 4.23185100  | -1.84998000 | 2.10377500  |
| C | 4.31594200  | -0.55002100 | 1.61370100  |
| C | 3.67635700  | -0.17224700 | 0.42637100  |
| C | 2.96865100  | -1.15402600 | -0.27555100 |
| C | 1.97054500  | -4.52653300 | 0.87188800  |
| C | 3.18392800  | -4.22251600 | 1.76635900  |
| H | 4.70690800  | -2.11056300 | 3.04524000  |

|   |             |             |             |
|---|-------------|-------------|-------------|
| H | 4.86540300  | 0.20612700  | 2.16703000  |
| H | 1.05704900  | -4.16274700 | 1.35664500  |
| H | 4.02614300  | -4.88534100 | 1.53323300  |
| C | 2.22179100  | -3.69033500 | -0.41760000 |
| C | 0.97113400  | -3.60925500 | -1.27509900 |
| C | 3.16406600  | -4.47739100 | -1.37178800 |
| C | 0.93349700  | -4.69053000 | -2.16500300 |
| C | -0.07567300 | -2.70314000 | -1.28228600 |
| C | 2.23097200  | -5.46239900 | -2.09987800 |
| H | 3.98067400  | -4.96604100 | -0.83332600 |
| C | -0.16999900 | -4.90140200 | -2.98002300 |
| C | -1.20611400 | -2.88625000 | -2.09017500 |
| H | 2.59661800  | -5.74019800 | -3.09194600 |
| C | -1.24008800 | -4.00876500 | -2.92334000 |
| H | -0.19644200 | -5.74126200 | -3.66807100 |
| H | -2.11171300 | -4.16063100 | -3.55308800 |
| H | 2.96636200  | -4.33401800 | 2.83232500  |
| H | 1.84071000  | -5.58995700 | 0.65320400  |
| H | 3.59846000  | -3.77832100 | -2.09436700 |
| H | 2.10418800  | -6.38953300 | -1.52806300 |
| O | 0.01862900  | -1.52748100 | -0.53202700 |
| O | 2.27914400  | -0.80013000 | -1.44191600 |
| P | 0.77939400  | -0.28146700 | -1.21570400 |
| O | 0.58821900  | 0.92806200  | -0.39725800 |
| O | 0.35584900  | -0.21932600 | -2.74017500 |
| C | -2.28435700 | -1.85845700 | -2.14111300 |
| C | -2.54478500 | -1.24846400 | -3.33174100 |
| C | -3.05099400 | -1.49509900 | -0.96211600 |
| C | -3.52946200 | -0.21248800 | -3.46327500 |
| H | -1.97094900 | -1.52664000 | -4.21365400 |
| C | -4.04198300 | -0.48140900 | -1.05752300 |
| C | -2.84854400 | -2.14803900 | 0.27541800  |
| C | -3.73587000 | 0.42178500  | -4.70869500 |
| C | -4.27701300 | 0.18968600  | -2.33026400 |
| C | -4.78350800 | -0.15714600 | 0.10004300  |
| H | -2.09665900 | -2.92810600 | 0.34492800  |
| C | -3.59480800 | -1.81814500 | 1.38509300  |
| C | -4.65870100 | 1.43537100  | -4.83717000 |
| H | -3.14860400 | 0.09608800  | -5.56328800 |
| C | -5.21876700 | 1.23108700  | -2.49177300 |
| C | -4.57082300 | -0.81291700 | 1.29295100  |
| H | -5.53246200 | 0.62654100  | 0.06408300  |
| H | -3.42147100 | -2.32142200 | 2.33174000  |
| C | -5.40467800 | 1.84035000  | -3.71552100 |



|   |             |             |             |
|---|-------------|-------------|-------------|
| H | -4.81043800 | 1.92019700  | -5.79628600 |
| H | -5.80524900 | 1.57263900  | -1.64675700 |
| H | -5.15297100 | -0.54063200 | 2.16762700  |
| H | -6.13319600 | 2.63937600  | -3.81130100 |
| C | 3.77855700  | 1.23261100  | -0.06242100 |
| C | 4.43394500  | 1.49763100  | -1.22258000 |
| C | 3.23445300  | 2.32227600  | 0.72619300  |
| C | 4.66473400  | 2.84036100  | -1.67367300 |
| H | 4.83162200  | 0.68041800  | -1.81980400 |
| C | 3.46465800  | 3.66349800  | 0.32721600  |
| C | 2.43833000  | 2.06811700  | 1.86556100  |
| C | 5.37105400  | 3.07615500  | -2.87337600 |
| C | 4.21666700  | 3.93307100  | -0.89204600 |
| C | 2.92824200  | 4.70015700  | 1.12354400  |
| H | 2.21652100  | 1.03963200  | 2.12970100  |
| C | 1.91357100  | 3.09740000  | 2.61388000  |
| C | 5.63517300  | 4.35970500  | -3.29615700 |
| H | 5.70284200  | 2.22145800  | -3.45686900 |
| C | 4.50705400  | 5.23855600  | -1.34578800 |
| C | 2.17454300  | 4.42786200  | 2.24508700  |
| H | 3.09387700  | 5.73516700  | 0.84750300  |
| H | 1.28946600  | 2.87749200  | 3.47472900  |
| C | 5.20093600  | 5.44851200  | -2.51943500 |
| H | 6.17748200  | 4.53263000  | -4.22037100 |
| H | 4.18748100  | 6.09973800  | -0.77001700 |
| H | 1.76713700  | 5.24467900  | 2.83267600  |
| H | 5.41190800  | 6.46270000  | -2.84418100 |
| H | -0.53748700 | 0.14243600  | -2.87306000 |

**COMIV**

|   |             |             |             |
|---|-------------|-------------|-------------|
| C | -5.42671900 | -0.34789500 | -0.64300100 |
| C | -5.16207300 | -1.25384900 | -1.64511500 |
| C | -3.82767600 | -1.51458100 | -2.03888600 |
| C | -2.77621400 | -0.81026900 | -1.38371400 |
| C | -3.07446000 | 0.11834500  | -0.35351600 |
| C | -4.37790100 | 0.34307800  | 0.00876900  |
| H | -4.31501300 | -2.98670100 | -3.54703400 |
| H | -6.45401900 | -0.16152000 | -0.34123200 |
| H | -5.97051000 | -1.78446200 | -2.14065900 |
| C | -3.50344000 | -2.45462100 | -3.05645900 |
| C | -1.44568100 | -1.06816800 | -1.76138500 |
| H | -2.24962600 | 0.64098700  | 0.12778900  |
| H | -4.60393500 | 1.05754700  | 0.79342600  |
| C | -1.16083900 | -1.99217600 | -2.75230900 |
| C | -2.20787600 | -2.71365200 | -3.41925500 |
| H | -0.65706100 | -0.54434500 | -1.23149900 |
| N | 0.13209400  | -2.32928400 | -3.15835500 |
| N | 1.09282800  | -1.68497900 | -2.68434200 |
| C | 2.35660100  | -2.20121800 | -3.16340000 |
| O | 2.55870500  | -3.30991400 | -3.58105100 |
| O | 3.25636400  | -1.23703200 | -3.02834800 |
| C | 4.57991800  | -1.56670000 | -3.46487300 |
| H | 4.59075100  | -1.71442200 | -4.54713700 |
| H | 5.20064700  | -0.71654800 | -3.18693100 |
| H | 4.92899700  | -2.47688100 | -2.97203500 |
| C | -1.87122900 | -3.72993500 | -4.47473500 |
| H | -1.32360300 | -3.27559300 | -5.30569000 |
| H | -1.23184500 | -4.51770600 | -4.06513000 |
| H | -2.78325100 | -4.18542800 | -4.86597700 |
| C | -5.09088700 | -2.01684200 | 2.64345400  |
| C | -4.47540400 | -0.88771900 | 3.23649300  |
| C | -3.12294600 | -0.65654700 | 3.00466600  |
| C | -2.42162300 | -1.54295900 | 2.18225300  |
| C | -3.03465500 | -2.66913000 | 1.59094300  |
| C | -4.39246200 | -2.89745300 | 1.83330200  |
| H | -6.14488800 | -2.20296500 | 2.82846400  |
| H | -2.60842400 | 0.20038000  | 3.42549100  |
| H | -4.89730100 | -3.74881300 | 1.38482800  |
| C | -0.83805700 | -2.54955200 | 0.94725100  |
| C | 0.34937900  | -2.88147300 | 0.29167200  |
| C | 0.34253400  | -4.01156300 | -0.51558600 |
| C | -0.81745200 | -4.78580000 | -0.68382300 |
| C | -1.99970100 | -4.44509500 | -0.03691600 |

|   |             |             |             |
|---|-------------|-------------|-------------|
| C | -2.01592600 | -3.32327000 | 0.79611900  |
| H | 1.24098800  | -2.27034300 | 0.40493600  |
| H | 1.25046000  | -4.28845500 | -1.04542600 |
| H | -0.78694000 | -5.65881500 | -1.32840600 |
| H | -2.89873700 | -5.03931000 | -0.17652100 |
| N | -1.09831300 | -1.49344700 | 1.79514300  |
| H | -0.51037400 | -0.66836200 | 1.86078800  |
| C | -5.31712300 | 0.03519700  | 4.12559200  |
| C | -5.78916200 | -0.75314500 | 5.35876200  |
| C | -4.52651000 | 1.25670100  | 4.60374400  |
| C | -6.54494500 | 0.53927600  | 3.34907900  |
| H | -6.39466800 | -1.61896100 | 5.07398200  |
| H | -4.93287200 | -1.11534500 | 5.93704800  |
| H | -6.39708200 | -0.11390900 | 6.00886600  |
| H | -4.16973700 | 1.85882700  | 3.76079100  |
| H | -5.17133500 | 1.89080000  | 5.22066900  |
| H | -3.66258700 | 0.97008500  | 5.21164100  |
| H | -7.15829300 | 1.17908600  | 3.99345000  |
| H | -6.24274000 | 1.12934800  | 2.47696200  |
| H | -7.17551700 | -0.28371000 | 3.00078000  |
| C | 2.34758500  | 4.24387400  | 0.29786200  |
| C | 2.08797500  | 5.47567200  | 0.90674500  |
| C | 0.85635600  | 6.09313600  | 0.73987500  |
| C | -0.13415500 | 5.44188700  | 0.01126200  |
| C | 0.04651200  | 4.15070800  | -0.50988600 |
| C | 1.32372000  | 3.57987300  | -0.36303200 |
| C | 4.15465100  | 4.66758400  | 1.75528000  |
| C | 3.28969100  | 5.93986000  | 1.69497300  |
| H | 0.66080300  | 7.06921300  | 1.17425000  |
| H | -1.08989500 | 5.93225800  | -0.13970200 |
| H | 3.83916700  | 4.04352900  | 2.59852900  |
| H | 3.80925700  | 6.75373900  | 1.17547700  |
| C | 3.82629000  | 3.91960000  | 0.43211900  |
| C | 4.39958900  | 2.51135900  | 0.41754300  |
| C | 4.63379200  | 4.56031900  | -0.73470500 |
| C | 5.69795500  | 2.54045700  | -0.10755700 |
| C | 3.87001400  | 1.29975300  | 0.84037300  |
| C | 6.02543200  | 3.91698800  | -0.63285600 |
| H | 4.64831100  | 5.65173700  | -0.67402200 |
| C | 6.48123000  | 1.39579400  | -0.13145600 |
| C | 4.63140900  | 0.11944900  | 0.82188200  |
| H | 6.55213300  | 3.88147200  | -1.59019200 |
| C | 5.94801300  | 0.20362300  | 0.34996200  |
| H | 7.49146200  | 1.42329200  | -0.52934600 |

|   |             |             |             |
|---|-------------|-------------|-------------|
| H | 6.54958500  | -0.70010800 | 0.34446000  |
| H | 3.01301400  | 6.31227300  | 2.68509100  |
| H | 5.22394100  | 4.87075000  | 1.86001600  |
| H | 4.16367000  | 4.27466700  | -1.68193100 |
| H | 6.66536800  | 4.46118400  | 0.07242700  |
| O | 2.53699400  | 1.25095100  | 1.24946900  |
| O | 1.59869800  | 2.31125100  | -0.87434000 |
| P | 1.39930500  | 1.05938400  | 0.12572200  |
| O | 0.06697800  | 0.97118400  | 0.75772200  |
| O | 1.93314300  | -0.12842200 | -0.72575100 |
| C | 4.08745200  | -1.22391100 | 1.17150900  |
| C | 4.22896300  | -2.21799900 | 0.25155300  |
| C | 3.46584900  | -1.52139400 | 2.44932500  |
| C | 3.79265500  | -3.56109400 | 0.48868400  |
| H | 4.67869800  | -1.99138400 | -0.71187400 |
| C | 2.98604100  | -2.83487800 | 2.70821100  |
| C | 3.34917000  | -0.53811600 | 3.45847100  |
| C | 3.97479000  | -4.55529300 | -0.49937600 |
| C | 3.16562500  | -3.88648400 | 1.71448400  |
| C | 2.35130300  | -3.08607500 | 3.94512300  |
| H | 3.75413900  | 0.45211700  | 3.28058100  |
| C | 2.73899100  | -0.81751600 | 4.66076300  |
| C | 3.55147200  | -5.84763300 | -0.28258300 |
| H | 4.45021400  | -4.28024100 | -1.43773000 |
| C | 2.73558300  | -5.21772600 | 1.90709800  |
| C | 2.22190200  | -2.10116700 | 4.89983800  |
| H | 1.95423900  | -4.07188700 | 4.15670700  |
| H | 2.65578200  | -0.04636800 | 5.42005000  |
| C | 2.92484100  | -6.17627600 | 0.93271800  |
| H | 3.69227500  | -6.60620200 | -1.04589700 |
| H | 2.24104200  | -5.50468400 | 2.82777300  |
| H | 1.72633400  | -2.32197800 | 5.83992900  |
| H | 2.58148900  | -7.19140300 | 1.10577200  |
| C | -1.06498900 | 3.46034600  | -1.22332100 |
| C | -0.81760600 | 2.77611700  | -2.37533400 |
| C | -2.44329200 | 3.56896100  | -0.75209500 |
| C | -1.85720300 | 2.15109100  | -3.13836500 |
| H | 0.19783700  | 2.69259300  | -2.74963300 |
| C | -3.50612600 | 3.13265900  | -1.58743500 |
| C | -2.76432700 | 4.06597000  | 0.53362900  |
| C | -1.53270500 | 1.31681500  | -4.23038100 |
| C | -3.21012200 | 2.35820600  | -2.78531700 |
| C | -4.83545800 | 3.37235600  | -1.17601000 |
| H | -1.96318700 | 4.29972600  | 1.22498200  |

|   |             |             |             |
|---|-------------|-------------|-------------|
| C | -4.07253900 | 4.24075600  | 0.93311600  |
| C | -2.52214000 | 0.68533200  | -4.95149400 |
| H | -0.48418500 | 1.16248700  | -4.47399000 |
| C | -4.20606000 | 1.71589600  | -3.55257800 |
| C | -5.12008300 | 3.93162500  | 0.05059800  |
| H | -5.65728400 | 3.09060900  | -1.82441500 |
| H | -4.28798800 | 4.62181200  | 1.92663000  |
| C | -3.86960400 | 0.89291900  | -4.60850800 |
| H | -2.26512400 | 0.02650800  | -5.77540400 |
| H | -5.25307700 | 1.83097100  | -3.29628400 |
| H | -6.15139900 | 4.10114000  | 0.34454200  |
| H | -4.65303600 | 0.38867000  | -5.16608600 |
| H | 1.42654700  | -0.55632400 | -1.49051600 |

**TSIV-1**Value of imaginary frequency = -242.9 cm<sup>-1</sup>

|   |             |             |             |
|---|-------------|-------------|-------------|
| C | -4.63855100 | -2.84687200 | -2.16652500 |
| C | -3.71353500 | -3.88075600 | -2.09692900 |
| C | -2.35331200 | -3.59998800 | -1.92233600 |
| C | -1.95586600 | -2.25020700 | -1.76767500 |
| C | -2.90524300 | -1.21616300 | -1.80527400 |
| C | -4.23922400 | -1.51111600 | -2.03090800 |
| H | -1.68286500 | -5.67692000 | -1.95954400 |
| H | -5.68744100 | -3.07640700 | -2.33120500 |
| H | -4.03427000 | -4.91284100 | -2.20616500 |
| C | -1.34370200 | -4.64438500 | -1.94642600 |
| C | -0.56297300 | -1.96392000 | -1.55627600 |
| H | -2.57948100 | -0.18738900 | -1.66318000 |
| H | -4.97246800 | -0.71383400 | -2.08879900 |
| C | 0.39183800  | -2.95623700 | -2.02487200 |
| C | -0.02547200 | -4.36334200 | -2.04020200 |
| H | -0.26760200 | -0.91702100 | -1.56377700 |
| N | 1.59735600  | -2.70622800 | -2.46527600 |
| N | 2.07020400  | -1.48063200 | -2.53924000 |
| C | 3.29291400  | -1.31291700 | -3.18572000 |
| O | 4.02299700  | -2.19590800 | -3.56248100 |
| O | 3.50827600  | -0.00288400 | -3.33894800 |
| C | 4.70386100  | 0.33441200  | -4.04767000 |
| H | 4.69656200  | -0.12203500 | -5.03975900 |
| H | 4.69998800  | 1.41999900  | -4.12684800 |
| H | 5.58965200  | -0.00387800 | -3.50247900 |
| C | 1.03053600  | -5.41719700 | -2.17725700 |
| H | 1.53796400  | -5.33613400 | -3.14343200 |
| H | 1.79619900  | -5.29279300 | -1.40463600 |
| H | 0.59124800  | -6.41301800 | -2.09052000 |
| C | -3.34116900 | -4.48481900 | 2.15621600  |
| C | -3.72831200 | -3.18994600 | 1.76552600  |
| C | -2.76706000 | -2.32657700 | 1.22259400  |
| C | -1.46144000 | -2.79048200 | 1.10369500  |
| C | -1.07582900 | -4.06694200 | 1.53586800  |
| C | -2.03012300 | -4.93168400 | 2.05730600  |
| H | -4.08734600 | -5.15364700 | 2.57483800  |
| H | -3.01382500 | -1.31417600 | 0.92257300  |
| H | -1.75493400 | -5.92605600 | 2.39556800  |
| C | 0.78870500  | -2.94298300 | 0.80435900  |
| C | 2.11770400  | -2.69293700 | 0.50782100  |
| C | 3.03011100  | -3.72039000 | 0.76862100  |
| C | 2.62374300  | -4.93990300 | 1.31127700  |

|   |             |             |             |
|---|-------------|-------------|-------------|
| C | 1.28236500  | -5.17654700 | 1.60967700  |
| C | 0.36394700  | -4.16833600 | 1.34741900  |
| H | 2.44159700  | -1.74328200 | 0.08819200  |
| H | 4.07434800  | -3.57178000 | 0.52926600  |
| H | 3.36505300  | -5.71102300 | 1.49605400  |
| H | 0.96055900  | -6.12202300 | 2.03578200  |
| N | -0.34280800 | -2.11820200 | 0.53172800  |
| H | -0.26701700 | -1.08747200 | 0.70982300  |
| C | -5.18435400 | -2.77090100 | 1.98132200  |
| C | -5.50166400 | -2.81634800 | 3.48561300  |
| C | -5.45567500 | -1.35409000 | 1.47754000  |
| C | -6.11580800 | -3.74079300 | 1.23640400  |
| H | -5.36938300 | -3.82142300 | 3.89750500  |
| H | -4.85137200 | -2.13344000 | 4.04174500  |
| H | -6.54102300 | -2.51595500 | 3.65905800  |
| H | -5.26321400 | -1.25843000 | 0.40352600  |
| H | -6.50596000 | -1.10330000 | 1.65464200  |
| H | -4.84787000 | -0.60977000 | 2.00290300  |
| H | -7.15813900 | -3.42630800 | 1.35812600  |
| H | -5.88279800 | -3.75479000 | 0.16700800  |
| H | -6.03105000 | -4.76371700 | 1.61558100  |
| C | 0.17665700  | 4.72317500  | 0.41131500  |
| C | -0.20553100 | 5.74503900  | 1.28463500  |
| C | -1.49831400 | 5.79599200  | 1.78528600  |
| C | -2.40296300 | 4.81825800  | 1.39254000  |
| C | -2.03913500 | 3.74747400  | 0.55819400  |
| C | -0.71108300 | 3.69883900  | 0.09719000  |
| C | 2.14063600  | 5.90462800  | 0.99007400  |
| C | 0.93860200  | 6.70014000  | 1.52098600  |
| H | -1.81024100 | 6.59656800  | 2.44957900  |
| H | -3.43264400 | 4.88497200  | 1.72757800  |
| H | 2.52366500  | 5.24877100  | 1.77980900  |
| H | 0.78816300  | 7.62664300  | 0.95275700  |
| C | 1.55341100  | 5.01882200  | -0.14852600 |
| C | 2.55334600  | 3.95145000  | -0.53677200 |
| C | 1.48614000  | 5.83921600  | -1.46643200 |
| C | 3.42890300  | 4.46109300  | -1.50041600 |
| C | 2.75624700  | 2.68319300  | -0.00911600 |
| C | 2.92329500  | 5.78833200  | -2.01947700 |
| H | 1.11761800  | 6.85589200  | -1.30220100 |
| C | 4.57627800  | 3.76012100  | -1.84476200 |
| C | 3.95651600  | 1.99849800  | -0.26228100 |
| H | 2.95906200  | 5.84514600  | -3.11106300 |
| C | 4.84873700  | 2.56411900  | -1.18608200 |

|   |             |             |             |
|---|-------------|-------------|-------------|
| H | 5.26802800  | 4.14799900  | -2.58724500 |
| H | 5.78024100  | 2.04187500  | -1.38447200 |
| H | 1.04194500  | 6.97885700  | 2.57335100  |
| H | 2.96487300  | 6.53306200  | 0.64150900  |
| H | 0.80373900  | 5.33292400  | -2.15783900 |
| H | 3.53140500  | 6.61507900  | -1.63286100 |
| O | 1.75472300  | 2.09861200  | 0.75025800  |
| O | -0.27115000 | 2.67960700  | -0.72591900 |
| P | 0.53659400  | 1.38848600  | -0.10330600 |
| O | -0.30931100 | 0.64309300  | 0.88163500  |
| O | 1.09925200  | 0.69274900  | -1.30458700 |
| C | 4.36573200  | 0.73569700  | 0.41324600  |
| C | 4.87606200  | -0.26983100 | -0.35037100 |
| C | 4.40408300  | 0.60949300  | 1.86380800  |
| C | 5.47870100  | -1.44235300 | 0.20685900  |
| H | 4.86704700  | -0.17137000 | -1.43034900 |
| C | 4.95378400  | -0.56208000 | 2.45399400  |
| C | 3.95441200  | 1.64699900  | 2.71180200  |
| C | 6.03130600  | -2.42735000 | -0.64277500 |
| C | 5.52576000  | -1.60483600 | 1.61087700  |
| C | 4.96640100  | -0.66732500 | 3.86255200  |
| H | 3.57813800  | 2.56402500  | 2.27591100  |
| C | 3.99199000  | 1.52212800  | 4.08266800  |
| C | 6.62979400  | -3.55116500 | -0.11657800 |
| H | 5.95720400  | -2.28780400 | -1.71851900 |
| C | 6.13896600  | -2.77038400 | 2.12236900  |
| C | 4.48999100  | 0.34612000  | 4.66442300  |
| H | 5.36223700  | -1.55976300 | 4.33250000  |
| H | 3.63712300  | 2.33358600  | 4.70998700  |
| C | 6.68082100  | -3.72007000 | 1.27935400  |
| H | 7.05096200  | -4.30554100 | -0.77336600 |
| H | 6.19491800  | -2.93663200 | 3.19183600  |
| H | 4.51102300  | 0.23730100  | 5.74418000  |
| H | 7.14724700  | -4.60553500 | 1.69992900  |
| C | -3.12409200 | 2.85536900  | 0.05838600  |
| C | -3.24916200 | 2.64063000  | -1.28065000 |
| C | -4.18960900 | 2.41245200  | 0.94846400  |
| C | -4.43015100 | 2.06203000  | -1.85631700 |
| H | -2.46921100 | 2.97971000  | -1.95695900 |
| C | -5.42037500 | 1.95894200  | 0.40546900  |
| C | -4.03854900 | 2.44438900  | 2.35425900  |
| C | -4.51382500 | 1.85418100  | -3.25141200 |
| C | -5.54371000 | 1.76364000  | -1.03339600 |
| C | -6.49295600 | 1.70379300  | 1.28851000  |



|   |             |             |             |
|---|-------------|-------------|-------------|
| H | -3.07364200 | 2.71184300  | 2.77131300  |
| C | -5.08953800 | 2.14533900  | 3.19483700  |
| C | -5.66859900 | 1.36959300  | -3.82595500 |
| H | -3.64743200 | 2.09005800  | -3.86365900 |
| C | -6.71531100 | 1.26777300  | -1.64757700 |
| C | -6.34105300 | 1.81062500  | 2.65410000  |
| H | -7.45677800 | 1.40292500  | 0.89344600  |
| H | -4.94890600 | 2.17714700  | 4.27054800  |
| C | -6.77887400 | 1.07669200  | -3.01370500 |
| H | -5.72229800 | 1.21257300  | -4.89851400 |
| H | -7.58338900 | 1.02082400  | -1.04667800 |
| H | -7.18143200 | 1.60410800  | 3.30966800  |
| H | -7.69056600 | 0.69252700  | -3.46045900 |
| H | 1.61540100  | -0.63195900 | -2.13283500 |

**IMIV-1**

|   |             |             |             |
|---|-------------|-------------|-------------|
| C | 4.63505500  | -2.73508700 | 2.37445600  |
| C | 3.85128400  | -3.81502900 | 1.97239000  |
| C | 2.53061000  | -3.61653300 | 1.56573200  |
| C | 2.02248700  | -2.30594300 | 1.52327400  |
| C | 2.80384600  | -1.23156600 | 1.93013300  |
| C | 4.11217700  | -1.44376500 | 2.36516800  |
| H | 2.08357700  | -5.71251100 | 1.05507100  |
| H | 5.65727400  | -2.90255200 | 2.70063000  |
| H | 4.25392200  | -4.82412400 | 1.99840000  |
| C | 1.63818100  | -4.74031500 | 1.25207900  |
| C | 0.60866600  | -2.11146300 | 1.02614600  |
| H | 2.39231200  | -0.22454200 | 1.89535400  |
| H | 4.71834800  | -0.60476000 | 2.68937700  |
| C | -0.21113500 | -3.23946400 | 1.62708700  |
| C | 0.30235700  | -4.59939100 | 1.32754000  |
| H | 0.25261600  | -1.13664700 | 1.35580500  |
| N | -1.23753900 | -3.14499800 | 2.38708400  |
| N | -1.73638400 | -1.92704700 | 2.70335900  |
| C | -2.77271100 | -1.86829500 | 3.59900200  |
| O | -3.32203200 | -2.80486700 | 4.13296400  |
| O | -3.09777700 | -0.57642300 | 3.79307100  |
| C | -4.21944800 | -0.35933800 | 4.65033300  |
| H | -4.01358600 | -0.73297300 | 5.65572200  |
| H | -4.36744100 | 0.71970300  | 4.66848200  |
| H | -5.11127700 | -0.85393500 | 4.25595500  |
| C | -0.68829700 | -5.70867500 | 1.15641500  |
| H | -1.31152900 | -5.80108500 | 2.05112600  |
| H | -1.36212300 | -5.48974100 | 0.31926900  |
| H | -0.18560300 | -6.66046700 | 0.97217200  |
| C | 3.24419800  | -3.67722700 | -3.25546500 |
| C | 3.77559200  | -2.83550000 | -2.25872700 |
| C | 2.92097100  | -2.27514200 | -1.30688900 |
| C | 1.56358200  | -2.60262400 | -1.33634500 |
| C | 1.04631700  | -3.42036000 | -2.35052500 |
| C | 1.89117400  | -3.95959500 | -3.32039400 |
| H | 3.90878400  | -4.10330300 | -4.00148200 |
| H | 3.30582700  | -1.59690000 | -0.55813100 |
| H | 1.49082700  | -4.58914300 | -4.10964000 |
| C | -0.69194400 | -2.71764400 | -1.03600400 |
| C | -2.00230700 | -2.58307900 | -0.58603200 |
| C | -2.98565900 | -3.31433200 | -1.24835200 |
| C | -2.68822600 | -4.11190700 | -2.35926500 |
| C | -1.38633100 | -4.20244300 | -2.83292100 |

|   |             |             |             |
|---|-------------|-------------|-------------|
| C | -0.38529900 | -3.50923800 | -2.15364800 |
| H | -2.26271200 | -1.94328900 | 0.25238200  |
| H | -4.00569700 | -3.26925500 | -0.88968900 |
| H | -3.48744400 | -4.65560000 | -2.85302000 |
| H | -1.14402500 | -4.80747000 | -3.70150500 |
| N | 0.49828000  | -2.13477000 | -0.49357000 |
| H | 0.29191300  | -0.39562400 | -0.84947500 |
| C | 5.28095000  | -2.55550900 | -2.25635800 |
| C | 5.67362000  | -1.88055700 | -3.58012400 |
| C | 5.68504500  | -1.63829900 | -1.10245400 |
| C | 6.04482200  | -3.88172800 | -2.11139300 |
| H | 5.45397300  | -2.51931400 | -4.44127000 |
| H | 5.13041800  | -0.93864400 | -3.70704900 |
| H | 6.74751300  | -1.66129000 | -3.58874400 |
| H | 5.46141900  | -2.09311000 | -0.13242000 |
| H | 6.76164600  | -1.44410700 | -1.14629700 |
| H | 5.17108400  | -0.67399100 | -1.15831900 |
| H | 7.12407700  | -3.69333200 | -2.09584900 |
| H | 5.77174500  | -4.38671800 | -1.17865400 |
| H | 5.83699100  | -4.56520100 | -2.94003700 |
| C | -0.11707100 | 4.52206600  | -0.73728200 |
| C | 0.33059000  | 5.41558000  | -1.71493000 |
| C | 1.64677100  | 5.37463700  | -2.14870300 |
| C | 2.51048300  | 4.44650000  | -1.58004200 |
| C | 2.08101200  | 3.48614500  | -0.64773700 |
| C | 0.72368800  | 3.51603000  | -0.27992900 |
| C | -2.01793900 | 5.70446200  | -1.49945200 |
| C | -0.77365600 | 6.36203200  | -2.11947900 |
| H | 2.01388800  | 6.07888200  | -2.88927500 |
| H | 3.56010700  | 4.47353100  | -1.84974700 |
| H | -2.42780000 | 4.96203200  | -2.19289600 |
| H | -0.59650900 | 7.35987400  | -1.70047100 |
| C | -1.47869300 | 4.96434200  | -0.24234100 |
| C | -2.51643400 | 4.01672800  | 0.31142800  |
| C | -1.34388800 | 5.96358400  | 0.94306500  |
| C | -3.32574800 | 4.68358900  | 1.23769300  |
| C | -2.80018300 | 2.70478600  | -0.02795800 |
| C | -2.76370300 | 6.05455700  | 1.53101200  |
| H | -0.93879200 | 6.92781300  | 0.62397700  |
| C | -4.45396300 | 4.06766400  | 1.75808300  |
| C | -3.97484700 | 2.08594300  | 0.41404000  |
| H | -2.76691300 | 6.28542800  | 2.59960700  |
| C | -4.78672800 | 2.79065900  | 1.31126300  |
| H | -5.08079900 | 4.57465800  | 2.48574000  |

|   |             |             |             |
|---|-------------|-------------|-------------|
| H | -5.69653900 | 2.31145300  | 1.66028300  |
| H | -0.84810700 | 6.47440600  | -3.20453000 |
| H | -2.81112600 | 6.41416400  | -1.24873900 |
| H | -0.66244600 | 5.53370600  | 1.68508600  |
| H | -3.35393500 | 6.83036300  | 1.02862800  |
| O | -1.86805100 | 1.98409400  | -0.79074400 |
| O | 0.20500700  | 2.57059500  | 0.61068600  |
| P | -0.68524300 | 1.32768500  | 0.09363400  |
| O | 0.17616700  | 0.59195300  | -0.98989900 |
| O | -1.15266800 | 0.53913700  | 1.25238800  |
| C | -4.46165300 | 0.76752500  | -0.08005900 |
| C | -4.61504300 | -0.26470100 | 0.78943300  |
| C | -4.95604100 | 0.64939100  | -1.44225000 |
| C | -5.30478700 | -1.46950200 | 0.42413100  |
| H | -4.22599300 | -0.17411800 | 1.80098000  |
| C | -5.66942900 | -0.51575700 | -1.82934300 |
| C | -4.77027800 | 1.68379500  | -2.38687200 |
| C | -5.42520500 | -2.53072900 | 1.34776500  |
| C | -5.87643100 | -1.58926900 | -0.86602800 |
| C | -6.15701500 | -0.59820400 | -3.15212700 |
| H | -4.24101700 | 2.58341500  | -2.09198200 |
| C | -5.25251500 | 1.57331700  | -3.67259600 |
| C | -6.10683900 | -3.68124400 | 1.01570300  |
| H | -4.96424000 | -2.43544200 | 2.32734500  |
| C | -6.58729300 | -2.77066700 | -1.17271400 |
| C | -5.95372000 | 0.42009100  | -4.05819900 |
| H | -6.70120700 | -1.47859500 | -3.47364400 |
| H | -5.09298600 | 2.37728700  | -4.38394300 |
| C | -6.70025500 | -3.79461400 | -0.25396600 |
| H | -6.18588100 | -4.49367400 | 1.73072500  |
| H | -7.04836600 | -2.89389700 | -2.14576700 |
| H | -6.33698900 | 0.32791800  | -5.06948700 |
| H | -7.24766600 | -4.69428300 | -0.51698000 |
| C | 3.11252500  | 2.66717700  | 0.05243600  |
| C | 3.07124600  | 2.57262500  | 1.41109500  |
| C | 4.29878300  | 2.19356600  | -0.65196800 |
| C | 4.18374200  | 2.09560100  | 2.18157300  |
| H | 2.20415200  | 2.93684800  | 1.95502700  |
| C | 5.46629300  | 1.85666500  | 0.08408600  |
| C | 4.33137700  | 2.08391200  | -2.06151700 |
| C | 4.08353600  | 1.99613300  | 3.58726900  |
| C | 5.40796500  | 1.79382300  | 1.53911100  |
| C | 6.65443700  | 1.57613100  | -0.62685400 |
| H | 3.41921500  | 2.25545000  | -2.62305300 |

|   |             |             |             |
|---|-------------|-------------|-------------|
| C | 5.49798700  | 1.77590000  | -2.72915100 |
| C | 5.16894900  | 1.61705100  | 4.34651700  |
| H | 3.13243700  | 2.22832300  | 4.05910200  |
| C | 6.50721600  | 1.41594600  | 2.34103400  |
| C | 6.68035300  | 1.55723500  | -2.00456100 |
| H | 7.56805000  | 1.35774200  | -0.08568300 |
| H | 5.50032300  | 1.70724000  | -3.81251500 |
| C | 6.39189800  | 1.33040900  | 3.71409800  |
| H | 5.08284300  | 1.54020300  | 5.42569000  |
| H | 7.45941400  | 1.17481900  | 1.88281300  |
| H | 7.60713100  | 1.33961600  | -2.52655400 |
| H | 7.25121700  | 1.03480800  | 4.30770500  |
| H | -1.40574100 | -1.04866900 | 2.29622700  |

**IMIV-2**

|   |             |             |             |
|---|-------------|-------------|-------------|
| C | 1.88272200  | 1.87039700  | -2.88517000 |
| C | 2.35661500  | 2.59193800  | -1.79059100 |
| C | 2.40482400  | 2.01066000  | -0.52067500 |
| C | 1.97115400  | 0.67951100  | -0.37032600 |
| C | 1.51373600  | -0.04702200 | -1.46415100 |
| C | 1.46582500  | 0.54817500  | -2.72787900 |
| H | 3.50867100  | 3.63578000  | 0.47472800  |
| H | 1.83890800  | 2.34109000  | -3.86277100 |
| H | 2.68518900  | 3.62094100  | -1.91522000 |
| C | 2.91309800  | 2.74275600  | 0.64904000  |
| C | 2.03556100  | 0.05589200  | 1.00667900  |
| H | 1.19453300  | -1.07716700 | -1.32031900 |
| H | 1.10335400  | -0.02009100 | -3.57923900 |
| C | 1.71249900  | 1.16794300  | 1.99804800  |
| C | 2.61095800  | 2.34754800  | 1.89731400  |
| H | 1.31424000  | -0.76491000 | 1.04941800  |
| N | 0.72149700  | 1.27071500  | 2.80015000  |
| N | -0.21596500 | 0.28790900  | 2.83264000  |
| C | -1.38617200 | 0.56190300  | 3.50480800  |
| O | -1.63359700 | 1.54694300  | 4.16322200  |
| O | -2.22102100 | -0.47380900 | 3.32652600  |
| C | -3.51369600 | -0.30060500 | 3.90123900  |
| H | -3.98052900 | 0.61245000  | 3.52353200  |
| H | -4.08709000 | -1.17914200 | 3.60552400  |
| H | -3.44580800 | -0.24358200 | 4.99059900  |
| C | 3.07114500  | 3.01132200  | 3.15557200  |
| H | 2.22699200  | 3.16575600  | 3.83266200  |
| H | 3.78845100  | 2.36364500  | 3.67434700  |
| H | 3.55007800  | 3.97145700  | 2.94892000  |
| C | 7.14083700  | -0.97775000 | -0.31353400 |
| C | 6.19088200  | -0.32399800 | -1.12835000 |
| C | 4.89847300  | -0.11680400 | -0.65363200 |
| C | 4.55520300  | -0.56117900 | 0.63512600  |
| C | 5.51656900  | -1.22587600 | 1.43337500  |
| C | 6.81210300  | -1.42892500 | 0.95092000  |
| H | 8.14782600  | -1.13671600 | -0.68750800 |
| H | 4.17364900  | 0.36791900  | -1.28713700 |
| H | 7.54819000  | -1.94006100 | 1.56535300  |
| C | 3.53180900  | -1.16179900 | 2.55934100  |
| C | 2.60116300  | -1.41271200 | 3.57479900  |
| C | 3.03887800  | -2.12004500 | 4.68799300  |
| C | 4.36417800  | -2.56710000 | 4.80488600  |
| C | 5.28173700  | -2.31897200 | 3.79374800  |

|   |             |             |             |
|---|-------------|-------------|-------------|
| C | 4.86536700  | -1.61198100 | 2.66223400  |
| H | 1.56857000  | -1.08717400 | 3.50856600  |
| H | 2.33351800  | -2.32804300 | 5.48668300  |
| H | 4.66780300  | -3.11605100 | 5.69031900  |
| H | 6.30628000  | -2.67108400 | 3.87439900  |
| N | 3.35205300  | -0.51041800 | 1.34565700  |
| H | -0.82516900 | 0.94883300  | -1.69328000 |
| C | 6.61308800  | 0.13644800  | -2.52902500 |
| C | 7.06774600  | -1.08146100 | -3.35064400 |
| C | 5.47325900  | 0.82751100  | -3.28329400 |
| C | 7.78246800  | 1.12785700  | -2.40595800 |
| H | 7.91034100  | -1.59578900 | -2.87914600 |
| H | 6.25108300  | -1.80226900 | -3.46312000 |
| H | 7.38454200  | -0.76588900 | -4.35098500 |
| H | 5.12192600  | 1.72013500  | -2.75500200 |
| H | 5.82577200  | 1.14040000  | -4.27149100 |
| H | 4.61841600  | 0.15826800  | -3.42835100 |
| H | 8.09522500  | 1.46945700  | -3.39891300 |
| H | 7.49041800  | 2.00453900  | -1.81886800 |
| H | 8.65047100  | 0.67141600  | -1.92108300 |
| C | -5.21119700 | 0.59732800  | -0.22538700 |
| C | -6.21424800 | 1.23791500  | -0.96165700 |
| C | -6.03329900 | 2.53216200  | -1.43225900 |
| C | -4.81760600 | 3.17317600  | -1.20805800 |
| C | -3.76168400 | 2.53097000  | -0.54834400 |
| C | -3.99375000 | 1.24206800  | -0.05221100 |
| C | -6.76082000 | -1.06841200 | -0.85589200 |
| C | -7.38058100 | 0.30266100  | -1.18071600 |
| H | -6.81836100 | 3.03217500  | -1.99177300 |
| H | -4.65652600 | 4.17846200  | -1.58642600 |
| H | -6.24099600 | -1.45598300 | -1.73898000 |
| H | -8.20697100 | 0.53944700  | -0.49995300 |
| C | -5.71029800 | -0.75988500 | 0.24847800  |
| C | -4.77494700 | -1.93008300 | 0.48809300  |
| C | -6.42573700 | -0.67641500 | 1.62852600  |
| C | -5.27492500 | -2.75810500 | 1.50041600  |
| C | -3.58962000 | -2.28052100 | -0.13564900 |
| C | -6.50604500 | -2.13484100 | 2.11753000  |
| H | -7.40271100 | -0.19134700 | 1.55331200  |
| C | -4.62359500 | -3.93882900 | 1.83628200  |
| C | -2.90791700 | -3.46550000 | 0.17500500  |
| H | -6.51346200 | -2.21696400 | 3.20822700  |
| C | -3.45398700 | -4.29051100 | 1.16192900  |
| H | -5.00924200 | -4.57814700 | 2.62514300  |

|   |             |             |             |
|---|-------------|-------------|-------------|
| H | -2.93047400 | -5.20718900 | 1.41611100  |
| H | -7.77161100 | 0.36195100  | -2.19971900 |
| H | -7.48986900 | -1.81519200 | -0.52892700 |
| H | -5.80847200 | -0.08825800 | 2.31339800  |
| H | -7.41466000 | -2.62714900 | 1.75039200  |
| O | -3.01388700 | -1.39541000 | -1.05569200 |
| O | -2.93613100 | 0.55930100  | 0.55679000  |
| P | -2.00359800 | -0.32724900 | -0.40972800 |
| O | -1.69568200 | 0.50910500  | -1.71427900 |
| O | -0.85065500 | -0.84980500 | 0.34380100  |
| C | -1.58619600 | -3.74603600 | -0.44972800 |
| C | -0.48533800 | -3.76720000 | 0.34487200  |
| C | -1.44242500 | -3.88315100 | -1.88632800 |
| C | 0.84137800  | -3.80750100 | -0.19659600 |
| H | -0.59577600 | -3.63689600 | 1.41888200  |
| C | -0.14598900 | -3.96239900 | -2.45878300 |
| C | -2.57319800 | -3.95348700 | -2.73067500 |
| C | 1.96003100  | -3.69303800 | 0.65819000  |
| C | 1.02803900  | -3.87235700 | -1.59891200 |
| C | -0.03833100 | -4.12244800 | -3.85822000 |
| H | -3.56382500 | -3.89773900 | -2.28952800 |
| C | -2.43817400 | -4.10421300 | -4.09283100 |
| C | 3.23616600  | -3.63114900 | 0.14305900  |
| H | 1.79683200  | -3.63558300 | 1.73195200  |
| C | 2.34721100  | -3.80145900 | -2.10014300 |
| C | -1.15653600 | -4.19151000 | -4.66138400 |
| H | 0.94027000  | -4.20897300 | -4.31680700 |
| H | -3.31961200 | -4.16015300 | -4.72368700 |
| C | 3.42713600  | -3.67941900 | -1.24914400 |
| H | 4.08877200  | -3.52960600 | 0.80765100  |
| H | 2.52596500  | -3.82007700 | -3.16938700 |
| H | -1.04441300 | -4.31941300 | -5.73351600 |
| H | 4.43141900  | -3.61018900 | -1.65565600 |
| C | -2.44092400 | 3.20654300  | -0.39895700 |
| C | -1.89306700 | 3.38315100  | 0.83471700  |
| C | -1.75080300 | 3.73022400  | -1.56949200 |
| C | -0.72011400 | 4.18530600  | 1.04015400  |
| H | -2.37828900 | 2.96480300  | 1.71411200  |
| C | -0.59660500 | 4.54060700  | -1.40242600 |
| C | -2.17740700 | 3.41155000  | -2.88078200 |
| C | -0.24427100 | 4.41848200  | 2.34980800  |
| C | -0.09245700 | 4.81187900  | -0.06301300 |
| C | 0.04144200  | 5.05047400  | -2.55543600 |
| H | -3.02290900 | 2.74530900  | -3.01187100 |



|   |             |             |             |
|---|-------------|-------------|-------------|
| C | -1.52350200 | 3.90854400  | -3.98709100 |
| C | 0.80152300  | 5.28788600  | 2.56839300  |
| H | -0.72227500 | 3.89786300  | 3.17597600  |
| C | 0.99523000  | 5.67662800  | 0.18926200  |
| C | -0.41232200 | 4.75104900  | -3.82189400 |
| H | 0.91616200  | 5.68293500  | -2.45293800 |
| H | -1.86473500 | 3.64367400  | -4.98281600 |
| C | 1.42381000  | 5.92074600  | 1.47782600  |
| H | 1.14975200  | 5.48023100  | 3.57839800  |
| H | 1.49537600  | 6.17986200  | -0.63066700 |
| H | 0.09942400  | 5.15523200  | -4.68991700 |
| H | 2.24948000  | 6.60502200  | 1.64940800  |
| H | -0.32190500 | -0.35861600 | 2.04628800  |

**IMIV-3**

|   |             |             |             |
|---|-------------|-------------|-------------|
| C | 5.10060500  | 0.62525500  | 0.92922600  |
| C | 5.68031200  | 1.02512200  | 2.13628300  |
| C | 5.32655300  | 2.23443900  | 2.72109300  |
| C | 4.37812600  | 3.03494500  | 2.08882400  |
| C | 3.73882100  | 2.63042500  | 0.90876100  |
| C | 4.10475400  | 1.39706200  | 0.34637000  |
| C | 6.25586700  | -1.25116300 | 1.77004400  |
| C | 6.64595700  | -0.03060800 | 2.62453300  |
| H | 5.77849500  | 2.55663300  | 3.65490600  |
| H | 4.11076800  | 3.99535600  | 2.52035500  |
| H | 5.41996400  | -1.77752700 | 2.24420400  |
| H | 7.68296500  | 0.27255200  | 2.43332900  |
| C | 5.75873300  | -0.64268200 | 0.42698800  |
| C | 5.02017600  | -1.66479100 | -0.41471900 |
| C | 6.97338200  | -0.33839700 | -0.49555000 |
| C | 5.91837100  | -2.32869800 | -1.25757100 |
| C | 3.68014500  | -2.03232800 | -0.41156600 |
| C | 7.28275700  | -1.68224300 | -1.17997300 |
| H | 7.82015100  | 0.07670100  | 0.05909000  |
| C | 5.50337800  | -3.40264400 | -2.03284700 |
| C | 3.25139500  | -3.15098500 | -1.13893300 |
| H | 7.74369500  | -1.56236200 | -2.16427800 |
| C | 4.17756600  | -3.82447500 | -1.94109900 |
| H | 6.19729900  | -3.91309000 | -2.69462700 |
| H | 3.84059900  | -4.68745100 | -2.50818200 |
| H | 6.55548500  | -0.21661900 | 3.69826400  |
| H | 7.07256700  | -1.96455000 | 1.62570500  |
| H | 6.66435700  | 0.39535700  | -1.24796400 |
| H | 7.96541600  | -2.28943400 | -0.57266300 |
| O | 2.75919600  | -1.28261400 | 0.29260600  |
| O | 3.46781100  | 0.92073100  | -0.78027200 |
| P | 2.11577400  | 0.00761300  | -0.52647100 |
| O | 1.19685600  | 0.67420900  | 0.44652000  |
| O | 1.66703900  | -0.40366400 | -1.89504600 |
| C | 1.86388600  | -3.68512500 | -1.02513200 |
| C | 1.00046800  | -3.59927500 | -2.06986900 |
| C | 1.48183900  | -4.42137600 | 0.16853600  |
| C | -0.26860000 | -4.27114700 | -2.06353300 |
| H | 1.27751800  | -3.01882800 | -2.94548400 |
| C | 0.23376000  | -5.09712400 | 0.21239600  |
| C | 2.34343100  | -4.49731200 | 1.28669400  |
| C | -1.12076500 | -4.19111500 | -3.18770300 |
| C | -0.64874700 | -5.05234900 | -0.94668900 |

|   |             |             |             |
|---|-------------|-------------|-------------|
| C | -0.09889100 | -5.81963600 | 1.37987600  |
| H | 3.30086200  | -3.98809600 | 1.25018700  |
| C | 1.99408300  | -5.21354300 | 2.41112800  |
| C | -2.29957000 | -4.90142500 | -3.23107200 |
| H | -0.81684800 | -3.57065400 | -4.02689100 |
| C | -1.86234700 | -5.77175200 | -1.01786300 |
| C | 0.76036700  | -5.88238000 | 2.45652900  |
| H | -1.05045300 | -6.33496500 | 1.44395400  |
| H | 2.67265800  | -5.26120700 | 3.25714200  |
| C | -2.66335100 | -5.70985900 | -2.13834800 |
| H | -2.94134100 | -4.84712200 | -4.10523000 |
| H | -2.17454000 | -6.39658000 | -0.18864100 |
| H | 0.47973700  | -6.44863600 | 3.33948600  |
| H | -3.58614600 | -6.28144100 | -2.17201700 |
| C | 2.77631600  | 3.53437400  | 0.22320400  |
| C | 2.98293300  | 3.84053400  | -1.08652600 |
| C | 1.68574700  | 4.17228900  | 0.94096100  |
| C | 2.18351900  | 4.80125600  | -1.78610300 |
| H | 3.79299100  | 3.36064800  | -1.62879300 |
| C | 0.93420000  | 5.19854200  | 0.30821200  |
| C | 1.33833000  | 3.78268200  | 2.25454100  |
| C | 2.40772500  | 5.05306400  | -3.15828400 |
| C | 1.17339900  | 5.51115800  | -1.09521300 |
| C | -0.05801800 | 5.86595800  | 1.05891500  |
| H | 1.86232800  | 2.95016000  | 2.71059300  |
| C | 0.33988500  | 4.43013600  | 2.95166900  |
| C | 1.64528000  | 5.97481800  | -3.84084400 |
| H | 3.19138900  | 4.49803600  | -3.66686500 |
| C | 0.41052700  | 6.45651100  | -1.81740500 |
| C | -0.34366800 | 5.50216400  | 2.35760400  |
| H | -0.61722800 | 6.67988600  | 0.61000900  |
| H | 0.08378300  | 4.11136600  | 3.95717000  |
| C | 0.63606300  | 6.68082400  | -3.16063500 |
| H | 1.82055100  | 6.15799300  | -4.89619300 |
| H | -0.37539600 | 7.01582900  | -1.32112900 |
| H | -1.11843800 | 6.02716400  | 2.90787900  |
| H | 0.03299200  | 7.40935800  | -3.69360400 |
| C | -3.88101100 | 4.64995800  | 1.76220500  |
| C | -3.11728400 | 4.62782400  | 0.60607400  |
| C | -2.44396800 | 3.45746700  | 0.22659700  |
| C | -2.57040500 | 2.29786500  | 0.99997000  |
| C | -3.30248200 | 2.33727700  | 2.18508200  |
| C | -3.95403000 | 3.50683000  | 2.56177600  |
| H | -1.45266400 | 4.38274000  | -1.46854400 |

|   |             |             |             |
|---|-------------|-------------|-------------|
| H | -4.40741400 | 5.55332600  | 2.05219800  |
| H | -3.02140800 | 5.51563500  | -0.01341200 |
| C | -1.60092800 | 3.43703800  | -0.94955400 |
| C | -1.86651300 | 1.02844600  | 0.56615500  |
| H | -3.38032000 | 1.44953900  | 2.80487500  |
| H | -4.53244900 | 3.52265800  | 3.47975200  |
| C | -1.31533300 | 1.05795100  | -0.84869400 |
| C | -1.00140700 | 2.33187200  | -1.45908300 |
| H | -0.88074700 | 1.03591000  | 1.07797600  |
| N | -0.94563800 | -0.01368900 | -1.49916500 |
| N | -1.30635400 | -1.30622800 | -1.19857500 |
| C | -2.61344900 | -1.64224800 | -1.50297200 |
| O | -3.31590600 | -1.00645200 | -2.25637700 |
| O | -2.96043600 | -2.74817600 | -0.85505200 |
| C | -4.31528300 | -3.15560900 | -1.07637400 |
| H | -4.45809100 | -3.44129200 | -2.12070400 |
| H | -4.47226400 | -4.01411700 | -0.42488700 |
| H | -4.99865500 | -2.34390500 | -0.81682800 |
| C | -0.17188400 | 2.38156700  | -2.71089700 |
| H | 0.82783200  | 1.96404600  | -2.54465500 |
| H | -0.64432100 | 1.81080400  | -3.51933000 |
| H | -0.06399200 | 3.41648200  | -3.04189600 |
| C | -6.59156900 | -1.09556000 | 1.07600500  |
| C | -6.22371900 | -0.02552900 | 0.23634000  |
| C | -4.87900700 | 0.34482000  | 0.16151700  |
| C | -3.94569600 | -0.35293600 | 0.91850400  |
| C | -4.30709100 | -1.44014000 | 1.74074500  |
| C | -5.65108400 | -1.80374800 | 1.81749500  |
| H | -7.63205800 | -1.39061800 | 1.14531000  |
| H | -4.55920600 | 1.15732500  | -0.48430600 |
| H | -5.96174100 | -2.63590100 | 2.44275400  |
| C | -2.03170400 | -1.13512700 | 1.84149100  |
| C | -0.69410000 | -1.37990000 | 2.15941800  |
| C | -0.43048600 | -2.46189600 | 2.99447000  |
| C | -1.45882800 | -3.27192200 | 3.49675400  |
| C | -2.78469800 | -3.02712600 | 3.16110600  |
| C | -3.07899600 | -1.95222300 | 2.32027300  |
| H | 0.11266600  | -0.76949100 | 1.75712600  |
| H | 0.60099500  | -2.68787600 | 3.24633500  |
| H | -1.20988500 | -4.11183300 | 4.13729100  |
| H | -3.57982300 | -3.66490800 | 3.53646900  |
| N | -2.56682900 | -0.15671300 | 0.99951400  |
| C | -7.23844600 | 0.75168800  | -0.60846100 |
| C | -7.23211600 | 2.22702800  | -0.17358400 |

|   |             |             |             |
|---|-------------|-------------|-------------|
| C | -6.83959600 | 0.65593000  | -2.09076000 |
| C | -8.66126200 | 0.20729600  | -0.45403000 |
| H | -7.50913600 | 2.32385400  | 0.88148300  |
| H | -6.24596400 | 2.68438200  | -0.30444500 |
| H | -7.95067900 | 2.80015500  | -0.77001600 |
| H | -6.81630500 | -0.38703500 | -2.42362300 |
| H | -7.56154100 | 1.19824400  | -2.71132000 |
| H | -5.85042700 | 1.08581200  | -2.27334800 |
| H | -9.34321800 | 0.78849500  | -1.08258700 |
| H | -8.72932800 | -0.83987300 | -0.76658200 |
| H | -9.01605500 | 0.28286400  | 0.57900700  |
| H | -0.81782700 | -1.76611900 | -0.43352500 |
| H | -0.18745800 | 0.04605800  | -2.18953900 |

**TSIV-2**Value of imaginary frequency = -1154.0 cm<sup>-1</sup>

|   |             |             |             |
|---|-------------|-------------|-------------|
| C | -4.82488300 | -0.99169600 | -0.89088900 |
| C | -5.60453600 | -0.74600100 | -2.02471500 |
| C | -5.79989600 | 0.55333400  | -2.47125300 |
| C | -5.18918300 | 1.59871000  | -1.78444800 |
| C | -4.31915200 | 1.37543100  | -0.70623900 |
| C | -4.13315200 | 0.04758100  | -0.28387500 |
| C | -5.30817900 | -3.09968200 | -1.83349600 |
| C | -6.14005500 | -2.04356300 | -2.58605300 |
| H | -6.42748800 | 0.76059400  | -3.33318600 |
| H | -5.38028100 | 2.62099900  | -2.09418500 |
| H | -4.36311700 | -3.27224100 | -2.36020500 |
| H | -7.21027300 | -2.14982000 | -2.37154900 |
| C | -4.99611000 | -2.43507900 | -0.46411200 |
| C | -3.95060800 | -3.19732500 | 0.32458600  |
| C | -6.22501000 | -2.57785800 | 0.48160100  |
| C | -4.57168400 | -4.13768900 | 1.15428400  |
| C | -2.56330900 | -3.11210900 | 0.29369800  |
| C | -6.07220900 | -3.97464600 | 1.10460600  |
| H | -7.17183600 | -2.43206700 | -0.04597800 |
| C | -3.82016300 | -5.03341200 | 1.90068700  |
| C | -1.78322100 | -4.02638600 | 1.01450000  |
| H | -6.53404800 | -4.05521000 | 2.09250800  |
| C | -2.43241600 | -4.98283900 | 1.80366100  |
| H | -4.30000700 | -5.75960300 | 2.55042200  |
| H | -1.82175100 | -5.68807500 | 2.35990700  |
| H | -6.02042200 | -2.10438500 | -3.67134600 |
| H | -5.81955100 | -4.06014400 | -1.72108300 |
| H | -6.14874600 | -1.81565200 | 1.26482300  |
| H | -6.52483400 | -4.74626800 | 0.46979500  |
| O | -1.96412100 | -2.09722200 | -0.43928400 |
| O | -3.26095800 | -0.24751100 | 0.75142200  |
| P | -1.72958300 | -0.68100800 | 0.36685800  |
| O | -1.20669200 | 0.26916700  | -0.70240800 |
| O | -0.97939200 | -0.87927100 | 1.63222500  |
| C | -0.29364400 | -4.08811000 | 0.95057500  |
| C | 0.45391100  | -3.64042500 | 1.99256700  |
| C | 0.34171100  | -4.80289500 | -0.13994900 |
| C | 1.86461800  | -3.89148800 | 2.07784200  |
| H | -0.02687500 | -3.09738100 | 2.80120000  |
| C | 1.74080500  | -5.04482000 | -0.10636400 |
| C | -0.41824200 | -5.29196600 | -1.22662700 |
| C | 2.58927000  | -3.47513700 | 3.21721400  |

|   |             |             |             |
|---|-------------|-------------|-------------|
| C | 2.51958700  | -4.60017600 | 1.04283800  |
| C | 2.32350800  | -5.74948500 | -1.18276900 |
| H | -1.48903000 | -5.11418300 | -1.24196900 |
| C | 0.17611400  | -5.99070500 | -2.25518300 |
| C | 3.92736800  | -3.77043000 | 3.34826400  |
| H | 2.06270800  | -2.92544000 | 3.99320900  |
| C | 3.89539100  | -4.88115500 | 1.19858400  |
| C | 1.56219100  | -6.21595100 | -2.23406700 |
| H | 3.39216800  | -5.93118000 | -1.19496700 |
| H | -0.42496800 | -6.36041700 | -3.08026000 |
| C | 4.58101000  | -4.48569800 | 2.32778900  |
| H | 4.47626000  | -3.45872800 | 4.23176800  |
| H | 4.42972000  | -5.43173300 | 0.43256600  |
| H | 2.03858100  | -6.75696900 | -3.04601000 |
| H | 5.63593800  | -4.72455900 | 2.42621900  |
| C | -3.72886100 | 2.52726600  | 0.03035800  |
| C | -3.79916100 | 2.55032900  | 1.39068200  |
| C | -3.22208000 | 3.69833300  | -0.67203500 |
| C | -3.40505000 | 3.69087400  | 2.16243300  |
| H | -4.19236500 | 1.69088300  | 1.92556900  |
| C | -2.94764600 | 4.88999500  | 0.05185700  |
| C | -3.00236800 | 3.69086300  | -2.06964800 |
| C | -3.45255600 | 3.64533800  | 3.57381000  |
| C | -2.99356200 | 4.87600300  | 1.50866300  |
| C | -2.62322700 | 6.06042100  | -0.67161800 |
| H | -3.10394200 | 2.75779300  | -2.61210500 |
| C | -2.65906200 | 4.84003500  | -2.74720000 |
| C | -3.07744600 | 4.73487400  | 4.32805600  |
| H | -3.78359300 | 2.72716300  | 4.05190900  |
| C | -2.60599600 | 5.97691400  | 2.30563100  |
| C | -2.50953000 | 6.04670400  | -2.04539400 |
| H | -2.46815000 | 6.99538500  | -0.14436400 |
| H | -2.49873100 | 4.80883500  | -3.82026000 |
| C | -2.64327400 | 5.90790000  | 3.68408300  |
| H | -3.11104800 | 4.68988000  | 5.41200700  |
| H | -2.26120300 | 6.89367000  | 1.83993000  |
| H | -2.26919900 | 6.96179400  | -2.57845600 |
| H | -2.33819800 | 6.76698600  | 4.27344200  |
| C | 0.93622700  | 4.77447600  | -2.95800900 |
| C | 0.52970700  | 4.82644900  | -1.63836900 |
| C | 0.60730700  | 3.68135500  | -0.82776600 |
| C | 1.12799800  | 2.48415100  | -1.34582700 |
| C | 1.52388800  | 2.43886300  | -2.68771700 |
| C | 1.42564700  | 3.57139600  | -3.48179400 |

|   |             |             |             |
|---|-------------|-------------|-------------|
| H | -0.25045700 | 4.63833200  | 0.91812700  |
| H | 0.87513200  | 5.65833200  | -3.58488400 |
| H | 0.13784300  | 5.74390000  | -1.21109800 |
| C | 0.20218000  | 3.71892900  | 0.55106000  |
| C | 1.24606700  | 1.28157900  | -0.47093800 |
| H | 1.92448300  | 1.51969300  | -3.10358600 |
| H | 1.74401400  | 3.52339200  | -4.51846400 |
| C | 1.05648600  | 1.50140300  | 0.96450300  |
| C | 0.36911300  | 2.69197800  | 1.42459600  |
| H | 0.08300700  | 0.72457300  | -0.60568900 |
| N | 1.34019700  | 0.60319400  | 1.89627600  |
| N | 1.95048200  | -0.60789200 | 1.68212200  |
| C | 3.33618000  | -0.58209600 | 1.71491100  |
| O | 3.97411100  | 0.24132500  | 2.33125400  |
| O | 3.84065700  | -1.58311800 | 1.00082100  |
| C | 5.27131400  | -1.62160400 | 0.98341600  |
| H | 5.65377300  | -1.89668300 | 1.96908800  |
| H | 5.53567700  | -2.38233300 | 0.24975300  |
| H | 5.66746400  | -0.64688300 | 0.69049400  |
| C | -0.06307400 | 2.80401200  | 2.86014200  |
| H | -0.78036700 | 2.01537600  | 3.11764300  |
| H | 0.78710100  | 2.73490500  | 3.54905400  |
| H | -0.55111400 | 3.76709300  | 3.02363300  |
| C | 6.31676000  | 1.40827400  | -1.27412600 |
| C | 5.53559000  | 2.27309900  | -0.48086400 |
| C | 4.17679800  | 1.99690800  | -0.31567000 |
| C | 3.63972300  | 0.87303800  | -0.93179800 |
| C | 4.41762200  | 0.00751600  | -1.72463500 |
| C | 5.77352300  | 0.28726500  | -1.89275200 |
| H | 7.37133400  | 1.61530300  | -1.41407500 |
| H | 3.54589900  | 2.64115600  | 0.29192400  |
| H | 6.40057200  | -0.36023000 | -2.49943800 |
| C | 2.23806300  | -0.72803500 | -1.68894200 |
| C | 1.13037400  | -1.51586600 | -2.00690700 |
| C | 1.33880400  | -2.61218300 | -2.83599900 |
| C | 2.60904900  | -2.93046600 | -3.33667300 |
| C | 3.70688100  | -2.14092000 | -3.02220000 |
| C | 3.52277500  | -1.02650300 | -2.20217600 |
| H | 0.13699400  | -1.27766100 | -1.64760200 |
| H | 0.48994700  | -3.23721900 | -3.09408100 |
| H | 2.73007600  | -3.80077000 | -3.97395400 |
| H | 4.69277900  | -2.37534900 | -3.41383600 |
| N | 2.32192000  | 0.41510200  | -0.89007200 |
| C | 6.11912000  | 3.50999800  | 0.21020500  |



|   |            |             |             |
|---|------------|-------------|-------------|
| C | 5.40279200 | 4.76727800  | -0.30988000 |
| C | 5.90076800 | 3.39138300  | 1.72768900  |
| C | 7.61998200 | 3.66722700  | -0.05032300 |
| H | 5.54860900 | 4.88095500  | -1.38909300 |
| H | 4.32563100 | 4.72778700  | -0.11913700 |
| H | 5.79980200 | 5.66050700  | 0.18536800  |
| H | 6.37714200 | 2.48794700  | 2.12181300  |
| H | 6.33053700 | 4.26016300  | 2.23884800  |
| H | 4.83745600 | 3.34442300  | 1.98086700  |
| H | 7.98703700 | 4.56023500  | 0.46534500  |
| H | 8.18668100 | 2.80872300  | 0.32465300  |
| H | 7.83651100 | 3.78618300  | -1.11698500 |
| H | 1.45402400 | -1.25028200 | 1.06758700  |
| H | 0.93733800 | 0.71533900  | 2.81841600  |

**IMIV-4**

|   |             |             |             |
|---|-------------|-------------|-------------|
| C | 5.01248900  | -1.39052300 | 0.63058300  |
| C | 5.89272200  | -1.28672400 | 1.71174700  |
| C | 6.23132900  | -0.04117000 | 2.22008500  |
| C | 5.66535400  | 1.09575100  | 1.65280000  |
| C | 4.70861200  | 1.02466500  | 0.62724600  |
| C | 4.39020700  | -0.25331600 | 0.13908000  |
| C | 5.36589000  | -3.58595400 | 1.42259700  |
| C | 6.35381700  | -2.65670900 | 2.14993900  |
| H | 6.93760900  | 0.05341900  | 3.03953500  |
| H | 5.96568100  | 2.07312000  | 2.01488800  |
| H | 4.45748700  | -3.70312400 | 2.02398100  |
| H | 7.38628500  | -2.83983800 | 1.82912400  |
| C | 5.00274300  | -2.81732600 | 0.12034800  |
| C | 3.81712700  | -3.44406200 | -0.58461900 |
| C | 6.11443400  | -3.03253200 | -0.94739600 |
| C | 4.26297100  | -4.41419900 | -1.49042400 |
| C | 2.45467000  | -3.24644800 | -0.41689400 |
| C | 5.76916900  | -4.38394500 | -1.59396800 |
| H | 7.11616400  | -2.99597700 | -0.51053600 |
| C | 3.35883600  | -5.21982500 | -2.16592300 |
| C | 1.51719400  | -4.07049100 | -1.05005400 |
| H | 6.11613000  | -4.46230200 | -2.62771100 |
| C | 1.99814100  | -5.05924600 | -1.91714000 |
| H | 3.70277700  | -5.96754500 | -2.87443600 |
| H | 1.27503900  | -5.70250800 | -2.40916700 |
| H | 6.32614400  | -2.77457800 | 3.23651100  |
| H | 5.77133000  | -4.57995800 | 1.21495200  |
| H | 6.03698100  | -2.23603100 | -1.69542200 |
| H | 6.21221200  | -5.21842600 | -1.03713000 |
| O | 2.01654500  | -2.16200900 | 0.36144900  |
| O | 3.43477700  | -0.40327100 | -0.87050600 |
| P | 1.92046900  | -0.78402100 | -0.46675300 |
| O | 1.51515100  | 0.17326300  | 0.72899400  |
| O | 1.07383300  | -0.80706600 | -1.67062400 |
| C | 0.04441200  | -4.01062300 | -0.81759600 |
| C | -0.78483700 | -3.67818000 | -1.84186500 |
| C | -0.51007200 | -4.52135400 | 0.42417500  |
| C | -2.20667800 | -3.85944600 | -1.76152200 |
| H | -0.36625700 | -3.30283800 | -2.77241400 |
| C | -1.91318500 | -4.71060600 | 0.54135200  |
| C | 0.32593900  | -4.88389300 | 1.50474100  |
| C | -3.02235600 | -3.56914100 | -2.87803600 |
| C | -2.78421400 | -4.38080000 | -0.58064500 |

|   |             |             |             |
|---|-------------|-------------|-------------|
| C | -2.41659000 | -5.25953200 | 1.74115700  |
| H | 1.39893600  | -4.75054500 | 1.41183000  |
| C | -0.19485200 | -5.42053800 | 2.66259100  |
| C | -4.37605300 | -3.81307000 | -2.84315100 |
| H | -2.55568800 | -3.15716600 | -3.76892400 |
| C | -4.18061600 | -4.59726300 | -0.56330100 |
| C | -1.58082200 | -5.61183600 | 2.77962400  |
| H | -3.48389000 | -5.40803300 | 1.85979000  |
| H | 0.46515000  | -5.69779100 | 3.47862000  |
| C | -4.95647400 | -4.33427700 | -1.67212100 |
| H | -4.99390600 | -3.59915600 | -3.71008400 |
| H | -4.65901300 | -4.99117200 | 0.32615400  |
| H | -1.99738100 | -6.03487500 | 3.68867300  |
| H | -6.02527200 | -4.52378300 | -1.63715500 |
| C | 4.18888100  | 2.28217400  | 0.01723200  |
| C | 4.16491700  | 2.40697600  | -1.34022300 |
| C | 3.88870400  | 3.44868100  | 0.84032300  |
| C | 3.91695400  | 3.65894000  | -1.99330500 |
| H | 4.40407400  | 1.55246000  | -1.96678000 |
| C | 3.75721000  | 4.72571800  | 0.22952100  |
| C | 3.72903900  | 3.35018100  | 2.24240700  |
| C | 3.88966000  | 3.72960200  | -3.40429400 |
| C | 3.74950000  | 4.83496600  | -1.22435400 |
| C | 3.61768700  | 5.86052800  | 1.06053700  |
| H | 3.73193900  | 2.36970200  | 2.70589500  |
| C | 3.56367000  | 4.47139500  | 3.02689800  |
| C | 3.68710200  | 4.93150700  | -4.04509400 |
| H | 4.02563400  | 2.81280700  | -3.97212400 |
| C | 3.54308600  | 6.05409400  | -1.90681000 |
| C | 3.54568100  | 5.74310900  | 2.43268900  |
| H | 3.56111000  | 6.84860100  | 0.61851300  |
| H | 3.44328900  | 4.36720400  | 4.10058100  |
| C | 3.51111800  | 6.10168800  | -3.28521000 |
| H | 3.66121000  | 4.97770400  | -5.12905600 |
| H | 3.39403900  | 6.97344700  | -1.35245300 |
| H | 3.44547800  | 6.63239200  | 3.04719500  |
| H | 3.34557300  | 7.05074600  | -3.78519400 |
| C | -0.17826300 | 4.45112500  | 2.98830200  |
| C | 0.39013800  | 4.29576000  | 1.74882300  |
| C | -0.11170000 | 3.33227900  | 0.84175600  |
| C | -1.21384100 | 2.52258200  | 1.21119900  |
| C | -1.78630500 | 2.70395200  | 2.49850700  |
| C | -1.27700700 | 3.64461400  | 3.36150300  |
| H | 1.26890200  | 3.81536800  | -0.75571700 |

|   |             |             |             |
|---|-------------|-------------|-------------|
| H | 0.21395900  | 5.18950600  | 3.68098200  |
| H | 1.23199000  | 4.90742300  | 1.43944200  |
| C | 0.44900500  | 3.16599400  | -0.45520600 |
| C | -1.71170900 | 1.54764900  | 0.28433600  |
| H | -2.63158400 | 2.09531100  | 2.80185700  |
| H | -1.72612300 | 3.76927100  | 4.34204400  |
| C | -1.12408600 | 1.38134200  | -0.96244400 |
| C | -0.03311700 | 2.24822100  | -1.34999400 |
| H | 1.27678000  | 1.07265200  | 0.43047000  |
| N | -1.51100300 | 0.47035400  | -1.94710400 |
| N | -2.32599400 | -0.59977200 | -1.62537300 |
| C | -3.68094800 | -0.41530400 | -1.79381600 |
| O | -4.19450700 | 0.37617600  | -2.55278200 |
| O | -4.34752400 | -1.26730300 | -1.00442400 |
| C | -5.76654200 | -1.19285300 | -1.11684600 |
| H | -6.09151200 | -1.54186400 | -2.10131700 |
| H | -6.16023800 | -1.84710900 | -0.33918500 |
| H | -6.10791200 | -0.16587000 | -0.96057800 |
| C | 0.53115200  | 2.17662700  | -2.74450800 |
| H | 1.07626300  | 1.24206600  | -2.91814500 |
| H | -0.27136900 | 2.23705300  | -3.48737300 |
| H | 1.21814400  | 3.00928500  | -2.90951700 |
| C | -6.82578300 | 1.77589700  | 1.07564500  |
| C | -6.06324000 | 2.57283500  | 0.19703800  |
| C | -4.70141000 | 2.29994500  | 0.04248700  |
| C | -4.14450300 | 1.24408000  | 0.75494600  |
| C | -4.90698000 | 0.44064800  | 1.63053700  |
| C | -6.26415900 | 0.72042500  | 1.78578100  |
| H | -7.88229400 | 1.97968700  | 1.20545900  |
| H | -4.08197700 | 2.87968200  | -0.63564700 |
| H | -6.87970900 | 0.11983400  | 2.44986300  |
| C | -2.73519100 | -0.29487700 | 1.60898500  |
| C | -1.60927000 | -1.05436900 | 1.93095400  |
| C | -1.78100700 | -2.09018200 | 2.84105100  |
| C | -3.03314600 | -2.36326700 | 3.41411200  |
| C | -4.14813000 | -1.60241200 | 3.08616700  |
| C | -4.00271900 | -0.55219700 | 2.17688700  |
| H | -0.63708600 | -0.83356200 | 1.49857700  |
| H | -0.92718300 | -2.70680800 | 3.10633900  |
| H | -3.12721800 | -3.18348300 | 4.11883500  |
| H | -5.11558800 | -1.81285700 | 3.53350200  |
| N | -2.83009800 | 0.78000900  | 0.73076000  |
| C | -6.68100400 | 3.71376600  | -0.61921200 |
| C | -5.95410400 | 5.02983100  | -0.29810000 |

|   |             |             |             |
|---|-------------|-------------|-------------|
| C | -6.52166900 | 3.39794300  | -2.11579900 |
| C | -8.17106600 | 3.90265200  | -0.32049300 |
| H | -6.04274200 | 5.27520500  | 0.76533600  |
| H | -4.88994700 | 4.97402500  | -0.54491200 |
| H | -6.39006900 | 5.85184200  | -0.87672200 |
| H | -7.01673000 | 2.45464100  | -2.36956500 |
| H | -6.97010000 | 4.19497000  | -2.71984000 |
| H | -5.46911000 | 3.30974000  | -2.39966000 |
| H | -8.55902700 | 4.73293600  | -0.91916000 |
| H | -8.75205800 | 3.00995900  | -0.57379300 |
| H | -8.34583000 | 4.14071900  | 0.73394000  |
| H | -2.04939600 | -1.17460800 | -0.83182500 |
| H | -0.71915300 | 0.14895400  | -2.49283600 |

**P**

|   |             |             |             |
|---|-------------|-------------|-------------|
| H | -0.47596500 | 2.42790200  | 1.34939200  |
| C | -2.37263500 | -3.86354700 | -2.27519500 |
| C | -3.01453800 | -3.61073000 | -1.08860300 |
| C | -2.75664900 | -2.41846900 | -0.36566800 |
| C | -1.81881700 | -1.48370100 | -0.87718800 |
| C | -1.17714800 | -1.76112600 | -2.11307600 |
| C | -1.44900800 | -2.92426100 | -2.79148800 |
| H | -4.13757600 | -2.84462800 | 1.24041600  |
| H | -2.57439000 | -4.77876800 | -2.82258200 |
| H | -3.73160600 | -4.31940700 | -0.68286500 |
| C | -3.42024200 | -2.12451200 | 0.85378000  |
| C | -1.56772600 | -0.28939200 | -0.13663700 |
| H | -0.47361400 | -1.04184900 | -2.51933200 |
| H | -0.95182900 | -3.12403900 | -3.73572300 |
| C | -2.21268000 | -0.04195000 | 1.06317600  |
| C | -3.17476000 | -0.98021200 | 1.56486100  |
| N | -2.01776000 | 1.14669600  | 1.79190600  |
| N | -0.73705000 | 1.65052200  | 1.94424200  |
| C | 0.24560100  | 0.86075000  | 2.47895300  |
| O | 0.05867800  | -0.21061400 | 3.01626600  |
| O | 1.43363600  | 1.46818100  | 2.35195400  |
| C | 2.53344600  | 0.74805500  | 2.90803400  |
| H | 2.55773900  | -0.26969100 | 2.51363600  |
| H | 3.42673900  | 1.29552900  | 2.60936100  |
| H | 2.45670200  | 0.71455800  | 3.99810700  |
| C | -3.86618400 | -0.71940900 | 2.87634000  |
| H | -3.13782400 | -0.63102500 | 3.69111700  |
| H | -4.45891200 | 0.20230000  | 2.85361000  |
| H | -4.54057100 | -1.54247200 | 3.11899100  |
| C | 3.46629100  | 0.71920900  | -0.85586300 |
| C | 2.88680700  | -0.48984900 | -0.40287900 |
| C | 1.49990500  | -0.57626400 | -0.29803300 |
| C | 0.73345400  | 0.53122000  | -0.66985000 |
| C | 1.30826500  | 1.73807800  | -1.11256700 |
| C | 2.70124000  | 1.82229200  | -1.20029800 |
| H | 4.54586100  | 0.78645200  | -0.94943500 |
| H | 1.00552500  | -1.47514600 | 0.05379200  |
| H | 3.17900500  | 2.73740900  | -1.53870000 |
| C | -0.97647400 | 1.94730200  | -1.07002000 |
| C | -2.23600900 | 2.54027700  | -1.17314100 |
| C | -2.28647700 | 3.86047200  | -1.60070900 |
| C | -1.11810000 | 4.57556200  | -1.91307300 |
| C | 0.13153200  | 3.98197300  | -1.79816100 |

|   |             |             |             |
|---|-------------|-------------|-------------|
| C | 0.21280900  | 2.65428800  | -1.36532100 |
| H | -3.13550700 | 1.98483600  | -0.92840100 |
| H | -3.25101400 | 4.35000400  | -1.69360900 |
| H | -1.19619900 | 5.60590400  | -2.24457200 |
| H | 1.03288700  | 4.53900700  | -2.03669100 |
| N | -0.65216100 | 0.65868000  | -0.66660600 |
| C | 3.79184700  | -1.69303600 | -0.11073400 |
| C | 3.02106700  | -2.84461100 | 0.54303600  |
| C | 4.37290300  | -2.18927300 | -1.44670500 |
| C | 4.95136700  | -1.30081000 | 0.81872900  |
| H | 2.54773600  | -2.53350800 | 1.48120300  |
| H | 2.24258400  | -3.23925300 | -0.11736800 |
| H | 3.70992200  | -3.66496300 | 0.76801100  |
| H | 4.97188100  | -1.41226100 | -1.93201600 |
| H | 5.01568000  | -3.06111300 | -1.28098400 |
| H | 3.57197600  | -2.47865800 | -2.13488100 |
| H | 5.59496100  | -2.16979100 | 0.99278300  |
| H | 5.57491800  | -0.51096400 | 0.39103700  |
| H | 4.58508400  | -0.95579400 | 1.79045100  |
| H | -2.49841900 | 1.14763300  | 2.68249300  |

*ent-P*

|   |             |             |             |
|---|-------------|-------------|-------------|
| H | 0.47598800  | 2.42758700  | 1.34902600  |
| C | 2.37236600  | -3.86369100 | -2.27512000 |
| C | 3.01424900  | -3.61089800 | -1.08852300 |
| C | 2.75639900  | -2.41861700 | -0.36560400 |
| C | 1.81864300  | -1.48380100 | -0.87714700 |
| C | 1.17699400  | -1.76119400 | -2.11307000 |
| C | 1.44881400  | -2.92434800 | -2.79145600 |
| H | 4.13726300  | -2.84488600 | 1.24051400  |
| H | 2.57407800  | -4.77893200 | -2.82249200 |
| H | 3.73130200  | -4.31957600 | -0.68276300 |
| C | 3.41999400  | -2.12471400 | 0.85386000  |
| C | 1.56761800  | -0.28947800 | -0.13657400 |
| H | 0.47354200  | -1.04185800 | -2.51936300 |
| H | 0.95168500  | -3.12411300 | -3.73572000 |
| C | 2.21265300  | -0.04201800 | 1.06318200  |
| C | 3.17463300  | -0.98037400 | 1.56491000  |
| N | 2.01803500  | 1.14678900  | 1.79176200  |
| N | 0.73728400  | 1.65065300  | 1.94434600  |
| C | -0.24529400 | 0.86070400  | 2.47905800  |
| O | -0.05818700 | -0.21061600 | 3.01639600  |
| O | -1.43336900 | 1.46795700  | 2.35210300  |
| C | -2.53316900 | 0.74729100  | 2.90754400  |
| H | -2.55724200 | -0.27019100 | 2.51243300  |
| H | -3.42648300 | 1.29483000  | 2.60904200  |
| H | -2.45664400 | 0.71321000  | 3.99760900  |
| C | 3.86613200  | -0.71966800 | 2.87636800  |
| H | 3.13782000  | -0.63108300 | 3.69117000  |
| H | 4.45907100  | 0.20190200  | 2.85362200  |
| H | 4.54027600  | -1.54291200 | 3.11907200  |
| C | -3.46633700 | 0.71961900  | -0.85565400 |
| C | -2.88696900 | -0.48947000 | -0.40262300 |
| C | -1.50007000 | -0.57598300 | -0.29774400 |
| C | -0.73352000 | 0.53138700  | -0.66970400 |
| C | -1.30821100 | 1.73827500  | -1.11250900 |
| C | -2.70118500 | 1.82260700  | -1.20017800 |
| H | -4.54589600 | 0.78695300  | -0.94929000 |
| H | -1.00571800 | -1.47485700 | 0.05413900  |
| H | -3.17889000 | 2.73774000  | -1.53862700 |
| C | 0.97655500  | 1.94723600  | -1.07006400 |
| C | 2.23618000  | 2.54001600  | -1.17327000 |
| C | 2.28683400  | 3.86013400  | -1.60103600 |
| C | 1.11853800  | 4.57532300  | -1.91350200 |
| C | -0.13117200 | 3.98192900  | -1.79848000 |



|   |             |             |             |
|---|-------------|-------------|-------------|
| C | -0.21264900 | 2.65431500  | -1.36544500 |
| H | 3.13556400  | 1.98443800  | -0.92843200 |
| H | 3.25142800  | 4.34952900  | -1.69405500 |
| H | 1.19676700  | 5.60560500  | -2.24515800 |
| H | -1.03244500 | 4.53907800  | -2.03705500 |
| N | 0.65211900  | 0.65871100  | -0.66646700 |
| C | -3.79209300 | -1.69262100 | -0.11061500 |
| C | -3.02148500 | -2.84434900 | 0.54311400  |
| C | -4.37302700 | -2.18865800 | -1.44672600 |
| C | -4.95174100 | -1.30046200 | 0.81871900  |
| H | -2.54798300 | -2.53332900 | 1.48121700  |
| H | -2.24316500 | -3.23918300 | -0.11736800 |
| H | -3.71049500 | -3.66454200 | 0.76818000  |
| H | -4.97199400 | -1.41156400 | -1.93192200 |
| H | -5.01578500 | -3.06054900 | -1.28122700 |
| H | -3.57201300 | -2.47785100 | -2.13487700 |
| H | -5.59561200 | -2.16935200 | 0.99221000  |
| H | -5.57496600 | -0.51026500 | 0.39120300  |
| H | -4.58565300 | -0.95599400 | 1.79070800  |
| H | 2.49850800  | 1.14739500  | 2.68244700  |

**TCE**

|   |             |             |             |
|---|-------------|-------------|-------------|
| C | -0.00003500 | 0.67806200  | -0.00001300 |
| C | 0.00003500  | -0.67806200 | -0.00000100 |
| C | 1.22701300  | 1.42237800  | 0.00001200  |
| N | 2.21284400  | 2.02513700  | 0.00002300  |
| C | -1.22693400 | 1.42239200  | -0.00003200 |
| N | -2.21256500 | 2.02542000  | -0.00004800 |
| C | -1.22701300 | -1.42237800 | -0.00001300 |
| N | -2.21284400 | -2.02513700 | -0.00002600 |
| C | 1.22693400  | -1.42239200 | 0.00003400  |
| N | 2.21256500  | -2.02542000 | 0.00006200  |

Table 4 系列 CPA 催化的过渡态结构

(S) -C1

TSI

Value of imaginary frequency = -269.2 cm<sup>-1</sup>

|   |             |             |             |
|---|-------------|-------------|-------------|
| C | -4.53375600 | -0.16466700 | -0.65818900 |
| C | -5.69930700 | -0.65542700 | -0.06410500 |
| C | -5.79610300 | -1.97766100 | 0.37073600  |
| C | -4.67189300 | -2.79320200 | 0.21497300  |
| C | -3.46973500 | -2.31748900 | -0.32180900 |
| C | -3.41586900 | -0.98309500 | -0.74671100 |
| C | -5.88673700 | 1.71201400  | -0.18513100 |
| C | -6.72882800 | 0.44447700  | 0.05439800  |
| H | -4.71668700 | -3.82952800 | 0.54160100  |
| H | -5.43155600 | 2.03298000  | 0.75838400  |
| H | -7.51329500 | 0.33330500  | -0.70526600 |
| C | -4.75876500 | 1.25431400  | -1.15211600 |
| C | -3.63779700 | 2.27507700  | -1.25422000 |
| C | -5.28889600 | 1.27213000  | -2.61436500 |
| C | -3.89205100 | 3.16679000  | -2.29969000 |
| C | -2.49133100 | 2.42952200  | -0.48550000 |
| C | -5.11396500 | 2.73112400  | -3.07392200 |
| H | -6.31902200 | 0.91094300  | -2.68226900 |
| C | -3.05617300 | 4.25595300  | -2.54929000 |
| C | -1.62134200 | 3.50734500  | -0.70519700 |
| H | -4.97681200 | 2.82056100  | -4.15584800 |
| C | -1.93597300 | 4.41000000  | -1.72918800 |
| H | -1.26329200 | 5.24705000  | -1.90110400 |
| H | -7.22551900 | 0.44477400  | 1.02958100  |
| H | -6.46072200 | 2.54968300  | -0.59200500 |
| H | -4.65583700 | 0.61867900  | -3.22492500 |
| H | -5.98532500 | 3.34355800  | -2.80841700 |
| O | -2.18297800 | 1.47181700  | 0.46590600  |
| O | -2.21909500 | -0.45480400 | -1.19957300 |
| P | -1.26340200 | 0.21746000  | -0.04785100 |
| O | -1.12378700 | -0.68118200 | 1.14253100  |
| O | -0.04632000 | 0.68875900  | -0.78980500 |
| H | -0.10825900 | -1.82355400 | 2.03268300  |
| C | -0.34485600 | 3.65531000  | 0.05035800  |
| C | 0.83750700  | 3.69540700  | -0.65834300 |
| C | -0.30731300 | 3.75474900  | 1.47980800  |
| C | 2.08851400  | 3.80143500  | -0.00940400 |
| H | 0.80482300  | 3.60307200  | -1.74014400 |
| C | 0.95747700  | 3.86404800  | 2.13020500  |
| C | -1.48158800 | 3.76839500  | 2.28341800  |

|   |             |             |             |
|---|-------------|-------------|-------------|
| C | 2.14911200  | 3.87340100  | 1.35861500  |
| C | 1.00663700  | 3.96348000  | 3.54727100  |
| H | -2.45156100 | 3.70100400  | 1.80138900  |
| C | -1.40194200 | 3.86990800  | 3.64921400  |
| C | -0.14364200 | 3.96439200  | 4.29249600  |
| H | 1.98040300  | 4.03276600  | 4.02615000  |
| H | -2.31025000 | 3.87957900  | 4.24383000  |
| H | -0.09559500 | 4.03869200  | 5.37472300  |
| C | 3.53177700  | -2.37784400 | -3.51996000 |
| C | 4.24224200  | -2.68625000 | -2.36768400 |
| C | 3.66978700  | -2.48048200 | -1.10526800 |
| C | 2.35821000  | -1.94828100 | -1.03228200 |
| C | 1.64882800  | -1.63698900 | -2.20809800 |
| C | 2.23289200  | -1.85467500 | -3.44426800 |
| H | 5.39936000  | -3.18418600 | 0.02964100  |
| H | 3.98961800  | -2.54187100 | -4.49125900 |
| H | 5.24540400  | -3.09760800 | -2.43429200 |
| C | 4.37308600  | -2.84003500 | 0.11496400  |
| C | 1.76467100  | -1.71926200 | 0.25743900  |
| H | 0.64889700  | -1.21852500 | -2.12272200 |
| H | 1.68577200  | -1.62236800 | -4.35190000 |
| C | 2.36338800  | -2.37859400 | 1.40579300  |
| C | 3.74882300  | -2.81262300 | 1.30865300  |
| H | 0.69789000  | -1.51896400 | 0.27494600  |
| N | 1.74799600  | -2.64503300 | 2.53133600  |
| N | 0.47929300  | -2.35883600 | 2.70138400  |
| C | -0.07667000 | -2.65733900 | 3.94653500  |
| O | 0.48892600  | -3.21901800 | 4.84960100  |
| O | -1.33413600 | -2.21669200 | 3.95683400  |
| C | -2.04419200 | -2.45439200 | 5.17859200  |
| H | -1.54637200 | -1.94977600 | 6.00888400  |
| H | -3.03853900 | -2.04017400 | 5.02403100  |
| H | -2.10341600 | -3.52555900 | 5.38153200  |
| C | 6.05477500  | 1.27066000  | -0.47305500 |
| C | 5.12715100  | 1.13455000  | -1.52293700 |
| C | 3.80279500  | 0.79864200  | -1.21337500 |
| C | 3.45472300  | 0.64728200  | 0.12382700  |
| C | 4.36776100  | 0.84487400  | 1.17008800  |
| C | 5.69198300  | 1.14080100  | 0.86430300  |
| H | 7.08690400  | 1.51424500  | -0.70757200 |
| H | 3.04670300  | 0.68968500  | -1.98269900 |
| H | 6.42556100  | 1.29255000  | 1.65028100  |
| C | 2.27034300  | 0.52642100  | 2.05518700  |
| C | 1.24765200  | 0.50946900  | 2.99347200  |

|   |             |             |             |
|---|-------------|-------------|-------------|
| C | 1.60337300  | 0.68940200  | 4.32970200  |
| C | 2.93511100  | 0.89132900  | 4.70788800  |
| C | 3.94918100  | 0.94286800  | 3.75339200  |
| C | 3.60950700  | 0.76162000  | 2.41502900  |
| H | 0.21275200  | 0.36338400  | 2.69596600  |
| H | 0.82493600  | 0.68288500  | 5.08696600  |
| H | 3.17814500  | 1.02613300  | 5.75713700  |
| H | 4.97882500  | 1.12912800  | 4.04330800  |
| N | 2.18219000  | 0.31069100  | 0.65135700  |
| H | 1.32350800  | 0.62592500  | 0.12842000  |
| C | 5.58967700  | 1.37138200  | -2.96444700 |
| C | 4.42377400  | 1.32331800  | -3.95503300 |
| C | 6.25222700  | 2.75519600  | -3.07185400 |
| C | 6.60813600  | 0.28760900  | -3.35169600 |
| H | 3.93570900  | 0.34362800  | -3.95740500 |
| H | 3.66839000  | 2.08289600  | -3.72522900 |
| H | 4.79703000  | 1.51451700  | -4.96602400 |
| H | 7.14229700  | 2.83311400  | -2.44125500 |
| H | 6.55988600  | 2.94177600  | -4.10649200 |
| H | 5.55441700  | 3.54594100  | -2.77627100 |
| H | 6.95677200  | 0.44571700  | -4.37821100 |
| H | 7.48144300  | 0.30157700  | -2.69214400 |
| H | 6.15343000  | -0.70685600 | -3.29248000 |
| H | 4.23072100  | -3.14518400 | 2.22228400  |
| C | -3.34575600 | 5.20920700  | -3.67780500 |
| H | -3.32613300 | 4.69161700  | -4.64324300 |
| H | -4.33878300 | 5.65920900  | -3.57411400 |
| H | -2.60930500 | 6.01534100  | -3.71162000 |
| C | -7.06280100 | -2.49304000 | 0.99938900  |
| H | -7.28015000 | -1.96837100 | 1.93642600  |
| H | -7.92386600 | -2.34073600 | 0.34009300  |
| H | -6.98722700 | -3.56042000 | 1.21966600  |
| C | -2.26678300 | -3.19628900 | -0.37289300 |
| C | -1.60169500 | -3.49701400 | -1.60775100 |
| C | -1.78884100 | -3.74127200 | 0.79907300  |
| C | -2.05297400 | -3.00585000 | -2.86425100 |
| C | -0.45361000 | -4.34359100 | -1.58673300 |
| C | -0.64152100 | -4.57020700 | 0.81663300  |
| H | -2.27942500 | -3.48883500 | 1.73526800  |
| C | -1.40306500 | -3.33611500 | -4.02729900 |
| H | -2.93032800 | -2.36801300 | -2.89707900 |
| C | 0.19973100  | -4.66402000 | -2.80711600 |
| C | 0.01996800  | -4.85702700 | -0.34966200 |
| H | -0.28248200 | -4.96411000 | 1.76332300  |

|   |             |             |             |
|---|-------------|-------------|-------------|
| C | -0.26386500 | -4.17690000 | -4.00168500 |
| H | -1.76746100 | -2.95447700 | -4.97615300 |
| H | 1.07951000  | -5.30184500 | -2.77144800 |
| H | 0.90779600  | -5.48427700 | -0.34909400 |
| H | 0.24384900  | -4.42567000 | -4.92873400 |
| H | 2.99909500  | 3.81223000  | -0.60155300 |
| H | 3.10404100  | 3.94647300  | 1.87303500  |

(S)-C1

TSII, TSII-1' Ar=naphthyl

Value of imaginary frequency = -282.7 cm<sup>-1</sup>

|   |             |             |             |
|---|-------------|-------------|-------------|
| C | -4.02515800 | -1.17393400 | 0.74628500  |
| C | -4.81635800 | -1.40765100 | 1.87423900  |
| C | -4.37412500 | -2.21552300 | 2.92151800  |
| C | -3.10079300 | -2.77870700 | 2.80411600  |
| C | -2.26446000 | -2.52255700 | 1.71136900  |
| C | -2.73503100 | -1.68572400 | 0.69206100  |
| C | -5.83172300 | 0.34316100  | 0.62718900  |
| C | -6.12091000 | -0.65347000 | 1.76477700  |
| H | -2.73153400 | -3.42936700 | 3.59338600  |
| H | -5.34921200 | 1.23717900  | 1.03779200  |
| H | -6.94424900 | -1.33192300 | 1.50569300  |
| C | -4.81569100 | -0.39556300 | -0.28860700 |
| C | -4.16014800 | 0.54597600  | -1.28088300 |
| C | -5.58015400 | -1.34199600 | -1.25808800 |
| C | -4.90665500 | 0.59292200  | -2.46094200 |
| C | -3.02789400 | 1.33975000  | -1.15327100 |
| C | -6.01257500 | -0.43469000 | -2.42461900 |
| H | -6.41353200 | -1.85039100 | -0.76489300 |
| C | -4.58860400 | 1.47659900  | -3.49196700 |
| C | -2.68610600 | 2.25599800  | -2.15514600 |
| H | -6.10792000 | -0.97800100 | -3.36981700 |
| C | -3.48500200 | 2.31157400  | -3.30442200 |
| H | -3.21836900 | 3.02306400  | -4.08243100 |
| H | -6.39587200 | -0.15807400 | 2.70104200  |
| H | -6.72565200 | 0.65555700  | 0.07971800  |
| H | -4.88276100 | -2.10261300 | -1.62690400 |
| H | -6.98220900 | 0.04094900  | -2.22831900 |
| O | -2.21125400 | 1.18855000  | -0.04413100 |
| O | -1.90017700 | -1.33414800 | -0.35564100 |
| P | -1.03377200 | 0.05556500  | -0.16562200 |
| O | -0.33401000 | 0.06782600  | 1.16074800  |
| O | -0.25841100 | 0.18852400  | -1.44188200 |
| H | 1.19131600  | -0.31111500 | 1.93970900  |
| C | -1.49453000 | 3.14503400  | -2.05038400 |
| C | -0.49581300 | 3.03115300  | -2.99219600 |
| C | -1.40303800 | 4.16602000  | -1.04843900 |
| C | 0.62391400  | 3.89425000  | -2.99261100 |
| H | -0.56950100 | 2.24790900  | -3.74056400 |
| C | -0.29320200 | 5.06124900  | -1.07983300 |
| C | -2.39149800 | 4.35135300  | -0.04161500 |
| C | 0.72005500  | 4.89501400  | -2.06121300 |

|   |             |             |             |
|---|-------------|-------------|-------------|
| C | -0.22805900 | 6.12005100  | -0.13364300 |
| H | -3.24396900 | 3.68042100  | -0.00711400 |
| C | -2.28653100 | 5.36894500  | 0.87385600  |
| C | -1.19580000 | 6.27047600  | 0.82604900  |
| H | 0.60944200  | 6.81061300  | -0.18877200 |
| H | -3.05054200 | 5.49127300  | 1.63538400  |
| H | -1.13052300 | 7.07936600  | 1.54740900  |
| C | -0.90773200 | -3.13878700 | 1.66869200  |
| C | 0.02040600  | -2.79098600 | 2.62428000  |
| C | -0.58359900 | -4.15398100 | 0.70859700  |
| C | 1.29647500  | -3.40249600 | 2.67202100  |
| H | -0.23179000 | -2.01440500 | 3.34183400  |
| C | 0.69689400  | -4.77947100 | 0.77289400  |
| C | -1.50021800 | -4.59295100 | -0.28667300 |
| C | 1.63078700  | -4.37103900 | 1.76257300  |
| C | 1.01527400  | -5.81382100 | -0.14708200 |
| H | -2.48009100 | -4.12864800 | -0.34478300 |
| C | -1.16634200 | -5.60157500 | -1.15657300 |
| C | 0.10395300  | -6.22286600 | -1.08635100 |
| H | 1.99705900  | -6.27671400 | -0.08494300 |
| H | -1.88229100 | -5.92965400 | -1.90419800 |
| H | 0.35408600  | -7.01760500 | -1.78281500 |
| C | 2.43431800  | -4.30660100 | -3.24531500 |
| C | 3.56268000  | -4.02708000 | -2.48906100 |
| C | 3.50244100  | -3.09484800 | -1.44309800 |
| C | 2.26560700  | -2.45969600 | -1.17236800 |
| C | 1.12421200  | -2.75680900 | -1.94365000 |
| C | 1.21091900  | -3.67347400 | -2.97533400 |
| H | 5.61436800  | -3.23999800 | -0.90174700 |
| H | 2.49828700  | -5.02688300 | -4.05554400 |
| H | 4.50609700  | -4.52059600 | -2.70435900 |
| C | 4.66847300  | -2.77883600 | -0.63412200 |
| C | 2.19984600  | -1.46489400 | -0.13951600 |
| H | 0.19112400  | -2.24376500 | -1.72324600 |
| H | 0.33420300  | -3.90932400 | -3.56921000 |
| C | 3.29384000  | -1.38585600 | 0.81145700  |
| C | 4.57312300  | -1.97182500 | 0.44104200  |
| H | 1.21073900  | -1.16660400 | 0.19234200  |
| N | 3.20767600  | -0.88405100 | 2.01839500  |
| N | 2.07263900  | -0.41705600 | 2.48379000  |
| C | 2.03559900  | -0.06452800 | 3.83265700  |
| O | 2.95766300  | -0.13892900 | 4.60548100  |
| O | 0.80243100  | 0.35494300  | 4.11765300  |
| C | 0.59798900  | 0.77777400  | 5.47114500  |



|   |             |             |             |
|---|-------------|-------------|-------------|
| H | 1.24188700  | 1.62833500  | 5.70585100  |
| H | -0.44935600 | 1.06819300  | 5.52882400  |
| H | 0.80613000  | -0.04362200 | 6.15965800  |
| C | 5.75292200  | -0.10534400 | -3.70975300 |
| C | 4.58340900  | -0.76848900 | -4.08684000 |
| C | 3.41284900  | -0.66254200 | -3.33160600 |
| C | 3.46226300  | 0.12261400  | -2.18879500 |
| C | 4.62374900  | 0.82738400  | -1.81697500 |
| C | 5.78112800  | 0.70857700  | -2.57573100 |
| H | 6.64676300  | -0.20917900 | -4.31657900 |
| H | 2.50326700  | -1.17253800 | -3.63086900 |
| H | 6.68245900  | 1.24724600  | -2.29983500 |
| C | 2.92927100  | 1.35757400  | -0.35914700 |
| C | 2.22615000  | 2.02784300  | 0.63355200  |
| C | 2.90259300  | 2.98967800  | 1.38891700  |
| C | 4.26772700  | 3.22610700  | 1.12935100  |
| C | 4.95868500  | 2.56283800  | 0.12316700  |
| C | 4.27462600  | 1.62194300  | -0.64360700 |
| H | 1.18090700  | 1.79415800  | 0.80779500  |
| H | 4.79917200  | 3.96214300  | 1.72552800  |
| H | 6.00348300  | 2.78555400  | -0.07081700 |
| N | 2.44857800  | 0.32992200  | -1.21716400 |
| H | 1.43724800  | 0.35517400  | -1.48391000 |
| H | 4.57793400  | -1.37982400 | -4.98363600 |
| C | 2.19840000  | 3.78872100  | 2.48862100  |
| C | 0.70251100  | 3.46301400  | 2.55336600  |
| C | 2.84541300  | 3.46265300  | 3.84441200  |
| C | 2.36501600  | 5.29123800  | 2.21001700  |
| H | 0.19778200  | 3.69229000  | 1.60702700  |
| H | 0.52590600  | 2.40732700  | 2.78667900  |
| H | 0.23174900  | 4.06563500  | 3.33752300  |
| H | 3.89823200  | 3.76226700  | 3.86489900  |
| H | 2.32703400  | 3.99868700  | 4.64745600  |
| H | 2.80434300  | 2.39078100  | 4.06127800  |
| H | 1.80196800  | 5.87503000  | 2.94704800  |
| H | 3.41319400  | 5.60031200  | 2.26740900  |
| H | 1.98809800  | 5.54103700  | 1.21479500  |
| H | 5.41975200  | -1.76791600 | 1.08847000  |
| C | -5.40543600 | 1.51629700  | -4.75564600 |
| H | -5.35491400 | 0.55919200  | -5.28646600 |
| H | -6.46152500 | 1.70872000  | -4.53873700 |
| H | -5.04843400 | 2.29708600  | -5.43126400 |
| C | -5.24025700 | -2.46191100 | 4.12735700  |
| H | -5.43347100 | -1.52974600 | 4.66966700  |

|   |             |             |             |
|---|-------------|-------------|-------------|
| H | -6.21334700 | -2.87321000 | 3.83810700  |
| H | -4.76531700 | -3.16306500 | 4.81740300  |
| H | 2.00977700  | -3.09047900 | 3.43042800  |
| H | 2.60868600  | -4.84569800 | 1.78686800  |
| H | 1.56806500  | 5.57492300  | -2.05632300 |
| H | 1.39976000  | 3.76167800  | -3.74029500 |

**(S)-C2****TSI**Value of imaginary frequency = -336.2 cm<sup>-1</sup>

|   |             |             |             |
|---|-------------|-------------|-------------|
| C | 5.05461100  | -0.82861000 | -0.84132700 |
| C | 6.28233000  | -0.28522100 | -0.45766500 |
| C | 6.48744100  | 1.09501700  | -0.41518100 |
| C | 5.40711600  | 1.91938200  | -0.74120500 |
| C | 4.14568700  | 1.40761600  | -1.07005600 |
| C | 3.98704700  | 0.01538500  | -1.11570300 |
| C | 6.30537500  | -2.59448000 | 0.10131700  |
| C | 7.24455900  | -1.38738600 | -0.08036000 |
| H | 5.53867200  | 2.99894400  | -0.71893400 |
| H | 5.89586500  | -2.58760700 | 1.11743900  |
| H | 7.97520300  | -1.56216500 | -0.88084700 |
| C | 5.14508900  | -2.34344500 | -0.90433400 |
| C | 3.94753400  | -3.23834800 | -0.63307600 |
| C | 5.55972100  | -2.84894200 | -2.31570500 |
| C | 4.05672800  | -4.42503000 | -1.36225600 |
| C | 2.85726600  | -3.05056700 | 0.20697500  |
| C | 5.24228900  | -4.35605100 | -2.29697500 |
| H | 6.60614400  | -2.62487300 | -2.54225200 |
| C | 3.13320800  | -5.46204300 | -1.21653600 |
| C | 1.91112500  | -4.06940300 | 0.38442700  |
| H | 5.01454200  | -4.75175700 | -3.29150800 |
| C | 2.07763500  | -5.26573300 | -0.32204800 |
| H | 1.34472500  | -6.05701700 | -0.18016000 |
| H | 7.81136000  | -1.15376200 | 0.82606300  |
| H | 6.79344800  | -3.55909600 | -0.06534000 |
| H | 4.93253400  | -2.35347100 | -3.06494500 |
| H | 6.08511000  | -4.93955100 | -1.90363300 |
| O | 2.66739100  | -1.82299300 | 0.81881900  |
| O | 2.74319800  | -0.53354000 | -1.37134400 |
| P | 1.78315500  | -0.74343800 | -0.05160500 |
| O | 1.72749400  | 0.50021800  | 0.78063300  |
| O | 0.53005700  | -1.36804300 | -0.58124700 |
| H | 0.51743800  | 1.73166300  | 1.36127500  |
| C | -2.02208100 | 1.13129300  | -4.78419900 |
| C | -2.76486700 | 1.95619900  | -3.95122400 |
| C | -2.48395200 | 2.02477200  | -2.57825800 |
| C | -1.40796100 | 1.25899900  | -2.06858500 |
| C | -0.67389900 | 0.41308200  | -2.91940100 |
| C | -0.98237500 | 0.34510000  | -4.26795500 |
| H | -4.11378000 | 3.40318800  | -2.10312100 |
| H | -2.25418600 | 1.09047400  | -5.84433300 |

|   |             |             |             |
|---|-------------|-------------|-------------|
| H | -3.57103900 | 2.56180100  | -4.35617500 |
| C | -3.24661300 | 2.89247500  | -1.69492900 |
| C | -1.06561700 | 1.35281300  | -0.66294100 |
| H | 0.13129500  | -0.18138700 | -2.49479300 |
| H | -0.41179700 | -0.30327000 | -4.92460500 |
| C | -1.66046400 | 2.44654300  | 0.09774400  |
| C | -2.85331100 | 3.09654600  | -0.42378400 |
| H | -0.06413700 | 1.03224500  | -0.39094000 |
| N | -1.21213300 | 2.90249700  | 1.24110100  |
| N | -0.10463800 | 2.45223500  | 1.77618500  |
| C | 0.18572900  | 2.88025300  | 3.07456300  |
| O | -0.44140300 | 3.69679300  | 3.69994700  |
| O | 1.25584500  | 2.21437700  | 3.50559100  |
| C | 1.66232400  | 2.54147400  | 4.83640600  |
| H | 0.86787800  | 2.29970300  | 5.54656600  |
| H | 2.54547500  | 1.93595900  | 5.03278800  |
| H | 1.90397700  | 3.60431100  | 4.91233700  |
| C | -5.96273600 | 0.11783100  | -0.58643800 |
| C | -5.19198200 | -0.36117400 | -1.66185000 |
| C | -3.81499200 | -0.54285900 | -1.47877600 |
| C | -3.27923300 | -0.26770500 | -0.22829400 |
| C | -4.05862000 | 0.15005500  | 0.85922500  |
| C | -5.42029200 | 0.36153700  | 0.67105800  |
| H | -7.02681100 | 0.28054900  | -0.73107100 |
| H | -3.17612700 | -0.90957500 | -2.27492400 |
| H | -6.05048800 | 0.69315300  | 1.49067000  |
| C | -1.90317400 | -0.17353500 | 1.58781100  |
| C | -0.84687200 | -0.36987700 | 2.46652300  |
| C | -1.08399200 | -0.10245900 | 3.81275000  |
| C | -2.33382800 | 0.34871100  | 4.25679400  |
| C | -3.39751500 | 0.49561700  | 3.37171600  |
| C | -3.17932500 | 0.21385500  | 2.02371400  |
| H | 0.12673900  | -0.70314800 | 2.12628600  |
| H | -0.28040700 | -0.25024100 | 4.52801900  |
| H | -2.48131100 | 0.56006200  | 5.31133800  |
| H | -4.37670300 | 0.80745400  | 3.72118600  |
| N | -1.90663400 | -0.29569100 | 0.16336900  |
| H | -1.23155100 | -0.96933700 | -0.24407500 |
| C | -5.88196300 | -0.65697900 | -2.99760700 |
| C | -4.92590100 | -1.29156000 | -4.01116000 |
| C | -7.05509200 | -1.62664900 | -2.77723500 |
| C | -6.41728300 | 0.66068000  | -3.58156800 |
| H | -4.09377500 | -0.62445400 | -4.25732900 |
| H | -4.51242400 | -2.23481700 | -3.63663400 |

|   |             |             |             |
|---|-------------|-------------|-------------|
| H | -5.46833800 | -1.50735400 | -4.93692600 |
| H | -7.80575300 | -1.21648600 | -2.09616100 |
| H | -7.54917700 | -1.83341300 | -3.73272000 |
| H | -6.70369400 | -2.57812000 | -2.36423700 |
| H | -6.91044600 | 0.47541900  | -4.54218000 |
| H | -7.14485300 | 1.12870300  | -2.91126600 |
| H | -5.59922000 | 1.37000000  | -3.74608600 |
| H | -3.36627100 | 3.78630200  | 0.23921600  |
| C | 3.27082900  | -6.73502600 | -2.00818700 |
| H | 3.16151700  | -6.54480000 | -3.08179700 |
| H | 4.25630000  | -7.18929800 | -1.86082600 |
| H | 2.51192700  | -7.46437800 | -1.71561700 |
| C | 7.82097000  | 1.66564700  | -0.01246000 |
| H | 8.06963500  | 1.39391900  | 1.01949900  |
| H | 8.62544600  | 1.28197400  | -0.64889900 |
| H | 7.82025200  | 2.75573500  | -0.08413100 |
| C | 3.00088600  | 2.30271100  | -1.39606300 |
| C | 2.51684000  | 3.27121000  | -0.48958100 |
| C | 2.39121900  | 2.17263300  | -2.64855100 |
| C | 1.42933900  | 4.10616000  | -0.88017300 |
| C | 3.05371000  | 3.43347400  | 0.83983100  |
| C | 1.33446200  | 2.98553400  | -3.03254400 |
| H | 2.76374000  | 1.41658900  | -3.33382500 |
| C | 0.91888600  | 5.09472200  | 0.01921700  |
| C | 0.83326900  | 3.95793200  | -2.16255900 |
| C | 2.58278400  | 4.38534000  | 1.68249300  |
| H | 3.83768900  | 2.76007800  | 1.16702400  |
| H | 0.87544900  | 2.86067600  | -4.00996400 |
| C | 1.49893000  | 5.25423200  | 1.30581400  |
| C | -0.18270100 | 5.91007100  | -0.36292000 |
| C | -0.27796300 | 4.79891800  | -2.52622900 |
| H | 3.00224600  | 4.49002800  | 2.68028500  |
| C | 0.97610800  | 6.21378700  | 2.18077300  |
| C | -0.67543900 | 6.85947200  | 0.54077300  |
| C | -0.76395300 | 5.72880000  | -1.66894500 |
| H | -0.72454600 | 4.65830000  | -3.50743600 |
| C | -0.09999700 | 7.00844400  | 1.79906700  |
| H | 1.41494600  | 6.32164700  | 3.16907400  |
| H | -1.51942600 | 7.47795900  | 0.24772900  |
| H | -1.60995600 | 6.35210300  | -1.94611100 |
| H | -0.49808600 | 7.74475500  | 2.49025600  |
| C | 0.78244000  | -3.88252500 | 1.34026900  |
| C | -0.56287200 | -3.83392900 | 0.92065900  |
| C | 1.08254700  | -3.75012300 | 2.69970100  |

|   |             |             |             |
|---|-------------|-------------|-------------|
| C | -1.58679300 | -3.64715800 | 1.89200900  |
| C | -0.94563700 | -3.91684700 | -0.46867100 |
| C | 0.08516900  | -3.59039600 | 3.65223600  |
| H | 2.12353500  | -3.77806400 | 3.00886700  |
| C | -2.95366600 | -3.53614100 | 1.48413000  |
| C | -1.25812700 | -3.53294500 | 3.26965600  |
| C | -2.24420800 | -3.83902200 | -0.84990400 |
| H | -0.16256800 | -4.01626000 | -1.21162300 |
| H | 0.34306700  | -3.49341800 | 4.70360500  |
| C | -3.29888400 | -3.64861000 | 0.11208600  |
| C | -3.97130600 | -3.29527100 | 2.44873000  |
| C | -2.30940600 | -3.30182700 | 4.22658200  |
| H | -2.51355000 | -3.90316400 | -1.90140000 |
| C | -4.64119600 | -3.53523000 | -0.26953700 |
| C | -5.29901000 | -3.16922100 | 2.02502500  |
| C | -3.60073800 | -3.17970500 | 3.83643500  |
| H | -2.03468300 | -3.20738100 | 5.27405400  |
| C | -5.62973500 | -3.29126600 | 0.67735500  |
| H | -4.89690400 | -3.62376000 | -1.32268300 |
| H | -6.07216700 | -2.97646300 | 2.76402300  |
| H | -4.38542400 | -2.98928600 | 4.56387000  |
| H | -6.66445500 | -3.18891100 | 0.36290100  |

**(S)-C2****TSII**Value of imaginary frequency = -275.6 cm<sup>-1</sup>

|   |             |             |             |
|---|-------------|-------------|-------------|
| C | -4.45708200 | 2.28031600  | -0.14348100 |
| C | -5.64597100 | 2.21283800  | 0.58589900  |
| C | -6.33995100 | 1.01153600  | 0.74192300  |
| C | -5.80006800 | -0.13004200 | 0.14063000  |
| C | -4.57924000 | -0.10507600 | -0.54204300 |
| C | -3.89486600 | 1.11420200  | -0.64408500 |
| C | -4.68083900 | 4.36132800  | 0.94607900  |
| C | -5.99233300 | 3.57489800  | 1.14312500  |
| H | -6.33316300 | -1.07526300 | 0.21657300  |
| H | -4.01854900 | 4.19058100  | 1.80186200  |
| H | -6.82133600 | 4.02788900  | 0.58413100  |
| C | -4.03564000 | 3.72773400  | -0.31760500 |
| C | -2.58585100 | 4.13219900  | -0.51442800 |
| C | -4.67480600 | 4.34301500  | -1.59776900 |
| C | -2.50077000 | 5.25741900  | -1.33717900 |
| C | -1.42427200 | 3.56847200  | -0.00217900 |
| C | -3.86774800 | 5.62579900  | -1.86276500 |
| H | -5.74826700 | 4.51631700  | -1.47851600 |
| C | -1.27755600 | 5.86940400  | -1.61568100 |
| C | -0.17742700 | 4.15401800  | -0.25297600 |
| H | -3.85018800 | 5.90259600  | -2.92127600 |
| C | -0.13218400 | 5.30610700  | -1.04897200 |
| H | 0.83558300  | 5.76668200  | -1.23537600 |
| H | -6.30168500 | 3.52887600  | 2.19188400  |
| H | -4.83059300 | 5.43944900  | 0.83600700  |
| H | -4.53057200 | 3.64449800  | -2.42941400 |
| H | -4.27963400 | 6.48175000  | -1.31225200 |
| O | -1.50438700 | 2.38358800  | 0.70912000  |
| O | -2.63478600 | 1.15198700  | -1.21807800 |
| P | -1.36041200 | 1.01763700  | -0.18828100 |
| O | -1.54447100 | -0.11168300 | 0.77864000  |
| O | -0.15430700 | 1.08042000  | -1.08151100 |
| H | -0.77188000 | -1.52344300 | 1.50434900  |
| C | 0.97991700  | -2.95378600 | -4.75069300 |
| C | 1.69667300  | -3.67893400 | -3.80926500 |
| C | 1.55566500  | -3.40101100 | -2.44256500 |
| C | 0.67784000  | -2.36171200 | -2.04791400 |
| C | -0.04382700 | -1.63559800 | -3.01152900 |
| C | 0.10076000  | -1.93565800 | -4.35581600 |
| H | 2.96027500  | -4.93128100 | -1.76276300 |
| H | 1.09951100  | -3.18044100 | -5.80604600 |

|   |             |             |             |
|---|-------------|-------------|-------------|
| H | 2.37072800  | -4.47124200 | -4.12198300 |
| C | 2.25899200  | -4.17195200 | -1.43012600 |
| C | 0.57504700  | -2.01548900 | -0.65356100 |
| H | -0.69640100 | -0.83090000 | -2.67977700 |
| H | -0.45900800 | -1.38056100 | -5.10169200 |
| C | 1.03116500  | -3.00068200 | 0.31547200  |
| C | 1.99586700  | -3.99973200 | -0.11947500 |
| H | -0.25068700 | -1.36666200 | -0.37648000 |
| N | 0.59784600  | -3.10990000 | 1.54617500  |
| N | -0.32873500 | -2.30865500 | 2.02145300  |
| C | -0.82774800 | -2.60456200 | 3.28677600  |
| O | -0.50696100 | -3.54891300 | 3.96701800  |
| O | -1.71700000 | -1.66930500 | 3.62109000  |
| C | -2.27569600 | -1.80890300 | 4.93112600  |
| H | -1.48909000 | -1.74626800 | 5.68733800  |
| H | -2.97504200 | -0.98204000 | 5.04025300  |
| H | -2.79619500 | -2.76491300 | 5.02496200  |
| C | 5.36755600  | -1.35798900 | -2.64599100 |
| C | 4.23266300  | -0.97639700 | -3.36549500 |
| C | 3.04846000  | -0.62363900 | -2.71576500 |
| C | 3.04066100  | -0.68029600 | -1.32944500 |
| C | 4.18858000  | -1.01906600 | -0.59113100 |
| C | 5.36186700  | -1.36580000 | -1.25046300 |
| H | 6.27434500  | -1.62483700 | -3.17980700 |
| H | 2.17394700  | -0.30969700 | -3.27403200 |
| H | 6.25599200  | -1.62554600 | -0.69187000 |
| C | 2.49979700  | -0.45594100 | 0.86705900  |
| C | 1.86155400  | -0.13388100 | 2.05750700  |
| C | 2.57816700  | -0.27025200 | 3.25507300  |
| C | 3.90509000  | -0.73686200 | 3.20231100  |
| C | 4.54700600  | -1.02709600 | 2.00402700  |
| C | 3.83730100  | -0.87383700 | 0.81793200  |
| H | 0.83157300  | 0.21220100  | 2.04105500  |
| H | 4.45633500  | -0.86556700 | 4.12900200  |
| H | 5.58263000  | -1.35369500 | 1.99501200  |
| N | 1.94750200  | -0.46074000 | -0.44810500 |
| H | 1.22447500  | 0.26541500  | -0.69565400 |
| H | 4.26729100  | -0.95005300 | -4.45030100 |
| C | 1.95062900  | 0.02495000  | 4.62247500  |
| C | 0.57285600  | 0.67908300  | 4.48824200  |
| C | 1.80767200  | -1.29925800 | 5.39152100  |
| C | 2.85347300  | 0.96599200  | 5.43664600  |
| H | 0.63213200  | 1.62494000  | 3.93846500  |
| H | -0.14045100 | 0.03234000  | 3.96933000  |



|   |             |             |             |
|---|-------------|-------------|-------------|
| H | 0.16927800  | 0.88914200  | 5.48438000  |
| H | 2.78466400  | -1.76134900 | 5.56697900  |
| H | 1.34051900  | -1.12024000 | 6.36679300  |
| H | 1.19411700  | -2.01809400 | 4.84022400  |
| H | 2.39101900  | 1.17008400  | 6.40849600  |
| H | 3.83891900  | 0.53085100  | 5.62524400  |
| H | 2.99645500  | 1.91959500  | 4.92101200  |
| H | 2.44792500  | -4.62011000 | 0.64767300  |
| C | -1.20552200 | 7.08310200  | -2.50317700 |
| H | -1.54409400 | 6.84824300  | -3.51844700 |
| H | -1.84784800 | 7.88689800  | -2.12807600 |
| H | -0.18389300 | 7.46449600  | -2.56724800 |
| C | -7.62357900 | 0.95945100  | 1.52662600  |
| H | -7.44903400 | 1.20127200  | 2.58093300  |
| H | -8.35052300 | 1.68461900  | 1.14589300  |
| H | -8.07534000 | -0.03409800 | 1.47783700  |
| C | -4.00548100 | -1.30456900 | -1.21607400 |
| C | -3.50392100 | -2.41142300 | -0.50578000 |
| C | -3.91806900 | -1.28787800 | -2.61344100 |
| C | -2.83386800 | -3.44586900 | -1.22262100 |
| C | -3.61331700 | -2.53283600 | 0.92810700  |
| C | -3.32858100 | -2.32577000 | -3.31867900 |
| H | -4.31546700 | -0.42998600 | -3.14863700 |
| C | -2.19085900 | -4.50842600 | -0.51215900 |
| C | -2.74863400 | -3.40277300 | -2.63920300 |
| C | -3.08720600 | -3.59403300 | 1.58540200  |
| H | -4.12694300 | -1.75058600 | 1.47624100  |
| H | -3.26985300 | -2.28762100 | -4.40326900 |
| C | -2.30634000 | -4.59231600 | 0.90090400  |
| C | -1.40621700 | -5.46426800 | -1.21423600 |
| C | -2.00570300 | -4.42452900 | -3.33139000 |
| H | -3.20085300 | -3.68524500 | 2.66340500  |
| C | -1.61533900 | -5.59651400 | 1.58835200  |
| C | -0.72130600 | -6.44843800 | -0.48950400 |
| C | -1.34371200 | -5.39236000 | -2.65170500 |
| H | -1.95807100 | -4.37540500 | -4.41605800 |
| C | -0.82011000 | -6.50684500 | 0.89682300  |
| H | -1.68481200 | -5.63777400 | 2.67166600  |
| H | -0.10739700 | -7.16623000 | -1.02717900 |
| H | -0.75422400 | -6.13816500 | -3.17874600 |
| H | -0.27664900 | -7.27091200 | 1.44390800  |
| C | 1.06839000  | 3.63253800  | 0.37698500  |
| C | 2.17802600  | 3.20729900  | -0.38149400 |
| C | 1.16950800  | 3.67649800  | 1.77175200  |

|   |            |            |             |
|---|------------|------------|-------------|
| C | 3.39688100 | 2.88800400 | 0.28453400  |
| C | 2.12936400 | 3.07437200 | -1.81855500 |
| C | 2.35176700 | 3.35799500 | 2.42375000  |
| H | 0.30778700 | 4.00152900 | 2.34816500  |
| C | 4.55530500 | 2.52166700 | -0.47142800 |
| C | 3.48497500 | 2.97023000 | 1.70024800  |
| C | 3.22522800 | 2.71663500 | -2.53123300 |
| H | 1.18223600 | 3.24996400 | -2.31644500 |
| H | 2.41104600 | 3.44075000 | 3.50521800  |
| C | 4.48696000 | 2.44943900 | -1.88851500 |
| C | 5.78307600 | 2.24606700 | 0.19138900  |
| C | 4.73451600 | 2.66525600 | 2.34755200  |
| H | 3.17077700 | 2.61605800 | -3.61232800 |
| C | 5.63777100 | 2.11847400 | -2.61288000 |
| C | 6.91313200 | 1.92051200 | -0.57057900 |
| C | 5.83101700 | 2.32245000 | 1.62874900  |
| H | 4.77537700 | 2.72066900 | 3.43247200  |
| C | 6.84029400 | 1.86526600 | -1.95839200 |
| H | 5.58084800 | 2.06126100 | -3.69677900 |
| H | 7.85147000 | 1.71717900 | -0.06139200 |
| H | 6.77209000 | 2.09850500 | 2.12430600  |
| H | 7.72461100 | 1.61174900 | -2.53519600 |

**(S)-C3****TS1**Value of imaginary frequency = -324.2 cm<sup>-1</sup>

|   |             |             |             |
|---|-------------|-------------|-------------|
| C | 4.64957700  | 0.65545600  | -1.15472000 |
| C | 5.78519300  | 1.28768900  | -0.64606600 |
| C | 5.73168500  | 2.58986500  | -0.14602300 |
| C | 4.48724800  | 3.22214300  | -0.13104500 |
| C | 3.31395500  | 2.59042600  | -0.56598100 |
| C | 3.41768600  | 1.29471100  | -1.09171500 |
| C | 6.30375300  | -1.01331900 | -0.92263400 |
| C | 6.97286300  | 0.35567800  | -0.69968400 |
| H | 4.41371600  | 4.23418300  | 0.26064800  |
| H | 6.00381400  | -1.43518600 | 0.04312900  |
| H | 7.64031400  | 0.61804700  | -1.53074300 |
| C | 5.02231600  | -0.69249200 | -1.74475300 |
| C | 4.06279700  | -1.87112200 | -1.77331900 |
| C | 5.38825400  | -0.59009600 | -3.25229500 |
| C | 4.35685600  | -2.69521700 | -2.86425100 |
| C | 3.03488700  | -2.22623000 | -0.90914700 |
| C | 5.39935700  | -2.04828300 | -3.74588700 |
| H | 6.33519500  | -0.06604500 | -3.41090800 |
| C | 3.70204000  | -3.91052500 | -3.06335700 |
| C | 2.35668200  | -3.44264600 | -1.07196600 |
| H | 5.15609100  | -2.13576200 | -4.80936500 |
| C | 2.71607100  | -4.27062300 | -2.14039200 |
| H | 2.18772600  | -5.21287500 | -2.26489900 |
| H | 7.57137400  | 0.38926400  | 0.21575900  |
| H | 6.94668600  | -1.73851400 | -1.42967700 |
| H | 4.59693600  | -0.03539200 | -3.76822800 |
| H | 6.38190300  | -2.51611000 | -3.60211700 |
| O | 2.63890400  | -1.34939100 | 0.08789900  |
| O | 2.28931800  | 0.60938600  | -1.50690200 |
| P | 1.50686600  | -0.23793000 | -0.33767500 |
| O | 1.30115400  | 0.60922900  | 0.88057400  |
| O | 0.34129900  | -0.87115300 | -1.03653900 |
| H | 0.06454700  | 1.42377100  | 1.90169400  |
| C | 1.22578000  | -3.80548300 | -0.17132500 |
| C | -0.03185900 | -3.85068800 | -0.68227700 |
| C | 1.43760200  | -4.07551600 | 1.23888100  |
| C | -1.18233700 | -4.09585500 | 0.13813400  |
| H | -0.19254100 | -3.62005000 | -1.73181000 |
| C | 0.32723300  | -4.36127400 | 2.07728300  |
| C | 2.73635300  | -4.06871000 | 1.79646600  |
| C | -2.47881300 | -4.03235500 | -0.41931800 |

|   |             |             |             |
|---|-------------|-------------|-------------|
| C | -1.02066100 | -4.34599700 | 1.52215400  |
| C | 0.56762400  | -4.63156000 | 3.44307600  |
| H | 3.58319900  | -3.85399600 | 1.15205000  |
| C | 2.94062400  | -4.33315600 | 3.13316400  |
| C | -3.59534400 | -4.20176800 | 0.36979300  |
| H | -2.58000600 | -3.82789900 | -1.48273200 |
| C | -2.18125600 | -4.52533700 | 2.30707300  |
| C | 1.84428800  | -4.61833700 | 3.96421300  |
| H | -0.26283900 | -4.85809200 | 4.10262400  |
| H | 3.94626400  | -4.32336300 | 3.54175800  |
| C | -3.44017200 | -4.45136700 | 1.74492600  |
| H | -4.58937700 | -4.12503200 | -0.06167500 |
| H | -2.09753300 | -4.70128300 | 3.37374500  |
| H | 2.00094100  | -4.83095600 | 5.01720300  |
| H | -4.31697400 | -4.57363400 | 2.37421700  |
| C | 2.00145000  | 3.29451900  | -0.48725600 |
| C | 1.29041700  | 3.51329800  | -1.62687000 |
| C | 1.49412600  | 3.80147600  | 0.77873600  |
| C | 0.04896100  | 4.23181100  | -1.63163400 |
| H | 1.67150900  | 3.14771100  | -2.57758900 |
| C | 0.27017600  | 4.52310000  | 0.81182900  |
| C | 2.18917600  | 3.58863600  | 1.99145300  |
| C | -0.64058300 | 4.45664000  | -2.84402800 |
| C | -0.49015500 | 4.71470000  | -0.41644100 |
| C | -0.17204500 | 5.05277900  | 2.04535300  |
| H | 3.08701300  | 2.98177600  | 1.98365300  |
| C | 1.74222500  | 4.12996700  | 3.17775900  |
| C | -1.84926700 | 5.11606700  | -2.85611800 |
| H | -0.20274400 | 4.08585600  | -3.76708200 |
| C | -1.74000900 | 5.37408100  | -0.45411900 |
| C | 0.55443900  | 4.87904400  | 3.20375900  |
| H | -1.09432200 | 5.62058300  | 2.09006900  |
| H | 2.30055300  | 3.95994700  | 4.09392900  |
| C | -2.40726200 | 5.56724000  | -1.64552600 |
| H | -2.37579300 | 5.27727100  | -3.79188700 |
| H | -2.19744700 | 5.72985000  | 0.46216400  |
| H | 0.19574100  | 5.30195300  | 4.13687100  |
| H | -3.36960100 | 6.07040200  | -1.64738600 |
| C | -3.24589500 | 2.02162700  | -3.92610300 |
| C | -3.97899700 | 2.41531200  | -2.81684200 |
| C | -3.46663800 | 2.23644900  | -1.52256600 |
| C | -2.18082100 | 1.66435200  | -1.37278800 |
| C | -1.44405100 | 1.27563600  | -2.50697500 |
| C | -1.97551300 | 1.44736500  | -3.77424400 |

|   |             |             |             |
|---|-------------|-------------|-------------|
| H | -5.22222900 | 3.04119100  | -0.50016900 |
| H | -3.66020800 | 2.16041600  | -4.92054200 |
| H | -4.95854300 | 2.86968800  | -2.93800100 |
| C | -4.22011900 | 2.65061100  | -0.35092900 |
| C | -1.65172100 | 1.43522600  | -0.04297300 |
| H | -0.46530900 | 0.82452700  | -2.36652700 |
| H | -1.40705600 | 1.14572000  | -4.64794300 |
| C | -2.32658200 | 2.08507300  | 1.07540500  |
| C | -3.67738600 | 2.58704100  | 0.87999800  |
| H | -0.57703000 | 1.29143200  | 0.03091000  |
| N | -1.82543200 | 2.23363300  | 2.27653100  |
| N | -0.60599100 | 1.85238900  | 2.56713500  |
| C | -0.24294000 | 1.87808800  | 3.91489700  |
| O | -0.90501500 | 2.33985900  | 4.80956500  |
| O | 0.94304500  | 1.28586400  | 4.04085200  |
| C | 1.45412900  | 1.25185500  | 5.37563700  |
| H | 0.79390700  | 0.66778100  | 6.02089400  |
| H | 2.43168200  | 0.77829100  | 5.30328300  |
| H | 1.54829100  | 2.26453200  | 5.77446200  |
| C | -6.07948700 | -1.20295400 | -0.33918800 |
| C | -5.28873000 | -1.11755500 | -1.49946300 |
| C | -3.91591100 | -0.86887900 | -1.36341600 |
| C | -3.39024600 | -0.76431300 | -0.08335300 |
| C | -4.16823200 | -0.92212000 | 1.07062400  |
| C | -5.53767000 | -1.12141100 | 0.94054500  |
| H | -7.14745200 | -1.37263400 | -0.43990300 |
| H | -3.26225700 | -0.79716200 | -2.22596600 |
| H | -6.16858800 | -1.24347100 | 1.81592200  |
| C | -1.95271200 | -0.87054500 | 1.67716300  |
| C | -0.82022400 | -1.09370200 | 2.44925300  |
| C | -1.01588300 | -1.38460800 | 3.79796800  |
| C | -2.30125500 | -1.44352900 | 4.35120500  |
| C | -3.42964100 | -1.25582000 | 3.55870200  |
| C | -3.24825700 | -0.98743500 | 2.20317400  |
| H | 0.17965400  | -1.01705700 | 2.03626100  |
| H | -0.14954000 | -1.57202200 | 4.42494200  |
| H | -2.41868600 | -1.66103800 | 5.40825700  |
| H | -4.42722600 | -1.34399500 | 3.97774000  |
| N | -2.03024300 | -0.53465900 | 0.28647100  |
| H | -1.24752000 | -0.87208500 | -0.31701400 |
| C | -5.94687800 | -1.31678900 | -2.86890100 |
| C | -4.91774800 | -1.33305100 | -4.00233800 |
| C | -6.69827700 | -2.65848500 | -2.89105100 |
| C | -6.93990400 | -0.17123200 | -3.12089800 |

|   |             |             |             |
|---|-------------|-------------|-------------|
| H | -4.37670100 | -0.38454400 | -4.07044100 |
| H | -4.18614300 | -2.13788100 | -3.87038900 |
| H | -5.42920700 | -1.49696400 | -4.95596100 |
| H | -7.49500900 | -2.69806700 | -2.14273500 |
| H | -7.15679000 | -2.80952800 | -3.87419300 |
| H | -6.01186900 | -3.49142900 | -2.70395200 |
| H | -7.42285300 | -0.29875500 | -4.09584200 |
| H | -7.72226100 | -0.14214800 | -2.35596100 |
| H | -6.42220800 | 0.79387800  | -3.11695600 |
| H | -4.20632400 | 2.93053800  | 1.76338700  |
| C | 4.03881700  | -4.78486700 | -4.24148700 |
| H | 3.82189600  | -4.27312800 | -5.18572500 |
| H | 5.10323400  | -5.04240600 | -4.25279400 |
| H | 3.46361000  | -5.71337200 | -4.22040100 |
| C | 6.97019000  | 3.26858100  | 0.37463800  |
| H | 7.39607400  | 2.71571700  | 1.21926700  |
| H | 7.74586100  | 3.32403800  | -0.39672900 |
| H | 6.75137400  | 4.28483300  | 0.71039300  |

**(S)-C3****TSII**Value of imaginary frequency = -296.6 cm<sup>-1</sup>

|   |             |             |             |
|---|-------------|-------------|-------------|
| C | 0.96619500  | 4.39349200  | -0.13163400 |
| C | 0.95247200  | 5.37055100  | 0.86560700  |
| C | -0.21676100 | 5.68646900  | 1.55901500  |
| C | -1.37253700 | 4.97056300  | 1.23434400  |
| C | -1.37375400 | 3.93568300  | 0.29128700  |
| C | -0.17845000 | 3.65317700  | -0.38391000 |
| C | 3.22136200  | 4.91118100  | 0.31980700  |
| C | 2.34000500  | 5.93724000  | 1.05870000  |
| H | -2.30045400 | 5.20023500  | 1.75336200  |
| H | 3.46440200  | 4.08185100  | 0.99336600  |
| H | 2.42364500  | 6.93606400  | 0.61110600  |
| C | 2.31426400  | 4.37286300  | -0.82380300 |
| C | 2.89766100  | 3.13006900  | -1.48057000 |
| C | 2.34441700  | 5.36635000  | -2.01988200 |
| C | 3.72873600  | 3.50873900  | -2.53821900 |
| C | 2.77725100  | 1.78022100  | -1.15042300 |
| C | 3.61217400  | 4.99039000  | -2.80445500 |
| H | 2.32705300  | 6.40885100  | -1.68988200 |
| C | 4.52429000  | 2.58573400  | -3.21763300 |
| C | 3.57334800  | 0.82833200  | -1.79930300 |
| H | 3.53010000  | 5.21499200  | -3.87249200 |
| C | 4.44587400  | 1.25516300  | -2.80883900 |
| H | 5.06395500  | 0.50821200  | -3.30211500 |
| H | 2.60389000  | 6.03693600  | 2.11615900  |
| H | 4.15734600  | 5.33130800  | -0.05944600 |
| H | 1.46080500  | 5.18881900  | -2.64269400 |
| H | 4.49429600  | 5.52644300  | -2.43105100 |
| O | 1.88795300  | 1.39144600  | -0.16432300 |
| O | -0.10255800 | 2.57785200  | -1.25417700 |
| P | 0.30502500  | 1.15492300  | -0.54663700 |
| O | -0.37526800 | 1.01195400  | 0.78217600  |
| O | 0.12708500  | 0.10741500  | -1.60436600 |
| H | -1.14784500 | -0.04904600 | 1.94155400  |
| C | 3.55627000  | -0.62828100 | -1.46142700 |
| C | 2.65225200  | -1.45521800 | -2.04582700 |
| C | 4.60688300  | -1.18744500 | -0.62740500 |
| C | 2.67875100  | -2.87602800 | -1.84432400 |
| H | 1.87743300  | -1.04024100 | -2.68209000 |
| C | 4.69822500  | -2.59453500 | -0.44987900 |
| C | 5.56586800  | -0.35310000 | -0.00820900 |
| C | 1.70424600  | -3.69278400 | -2.45528400 |

|   |             |             |             |
|---|-------------|-------------|-------------|
| C | 3.68708600  | -3.46141100 | -1.04177100 |
| C | 5.78502000  | -3.10907200 | 0.29139100  |
| H | 5.47827700  | 0.72243000  | -0.12718800 |
| C | 6.60465100  | -0.88297200 | 0.72779900  |
| C | 1.69914400  | -5.05642700 | -2.25700200 |
| H | 0.94805800  | -3.22195200 | -3.07909300 |
| C | 3.66046900  | -4.86058900 | -0.85336500 |
| C | 6.72413800  | -2.27596700 | 0.86354400  |
| H | 5.89262400  | -4.18031900 | 0.41931400  |
| H | 7.33221700  | -0.22485000 | 1.19246200  |
| C | 2.68426700  | -5.64053400 | -1.44147600 |
| H | 0.93052200  | -5.67281500 | -2.71514900 |
| H | 4.40465900  | -5.34097300 | -0.22788500 |
| H | 7.54993600  | -2.69985100 | 1.42654100  |
| H | 2.67926000  | -6.71283500 | -1.27144600 |
| C | -2.61352000 | 3.17004000  | -0.02411400 |
| C | -3.10115100 | 3.20757500  | -1.29346900 |
| C | -3.31873700 | 2.40305000  | 0.98988700  |
| C | -4.30018800 | 2.52159400  | -1.67888800 |
| H | -2.57818900 | 3.78267100  | -2.05383100 |
| C | -4.48972500 | 1.67743300  | 0.63675500  |
| C | -2.85869700 | 2.35172000  | 2.32579800  |
| C | -4.78631500 | 2.62541600  | -3.00087900 |
| C | -4.99655800 | 1.73624700  | -0.72946000 |
| C | -5.14139900 | 0.91963100  | 1.63618800  |
| H | -1.94101900 | 2.86611000  | 2.58738300  |
| C | -3.54446700 | 1.64281100  | 3.28819800  |
| C | -5.92910500 | 1.95952500  | -3.38565800 |
| H | -4.23757700 | 3.23996500  | -3.70982100 |
| C | -6.15680500 | 1.05102500  | -1.15427800 |
| C | -4.68840700 | 0.90715700  | 2.93854100  |
| H | -6.01919600 | 0.33574600  | 1.38455600  |
| H | -3.18644000 | 1.63086200  | 4.31423100  |
| C | -6.61257500 | 1.15972100  | -2.45253900 |
| H | -6.29756200 | 2.04388700  | -4.40337400 |
| H | -6.71218800 | 0.42928200  | -0.46098600 |
| H | -5.21236500 | 0.32465900  | 3.68997300  |
| H | -7.50596800 | 0.62062500  | -2.75283800 |
| C | -4.79854100 | -1.65227000 | -3.38847500 |
| C | -5.04152400 | -2.46421500 | -2.29102400 |
| C | -4.25137600 | -2.35376700 | -1.13738100 |
| C | -3.21638100 | -1.38739300 | -1.11417000 |
| C | -2.98771500 | -0.56044500 | -2.23105600 |
| C | -3.76825200 | -0.69962800 | -3.36433500 |



|   |             |             |             |
|---|-------------|-------------|-------------|
| H | -5.24077600 | -3.96853400 | -0.04744700 |
| H | -5.41417100 | -1.75234700 | -4.27769900 |
| H | -5.83929200 | -3.20114900 | -2.31775300 |
| C | -4.47200100 | -3.20481000 | 0.02006500  |
| C | -2.35096700 | -1.29729800 | 0.03417000  |
| H | -2.17294800 | 0.15920300  | -2.19074000 |
| H | -3.59279500 | -0.06627900 | -4.22743700 |
| C | -2.76776500 | -1.97606900 | 1.25111100  |
| C | -3.76809600 | -3.02834400 | 1.15522800  |
| H | -1.75450800 | -0.39307000 | 0.12152900  |
| N | -2.36527200 | -1.66928000 | 2.45964000  |
| N | -1.54526200 | -0.67051800 | 2.67513600  |
| C | -1.30425300 | -0.32192100 | 4.00327400  |
| O | -1.74162200 | -0.88871600 | 4.97267200  |
| O | -0.51591800 | 0.75322100  | 4.01154400  |
| C | -0.20280700 | 1.27540800  | 5.30596100  |
| H | 0.25490200  | 0.50852900  | 5.93372000  |
| H | 0.49689200  | 2.09073900  | 5.13015800  |
| H | -1.10766000 | 1.65023300  | 5.79119500  |
| C | -2.05322200 | -6.18731100 | -1.58193000 |
| C | -2.29748000 | -5.15684600 | -2.49338200 |
| C | -1.86072400 | -3.85246500 | -2.24697700 |
| C | -1.18194600 | -3.62588100 | -1.05940200 |
| C | -0.88998300 | -4.66025800 | -0.15272900 |
| C | -1.33517500 | -5.95139500 | -0.40856600 |
| H | -2.40857900 | -7.18927500 | -1.80052800 |
| H | -2.03982300 | -3.05545500 | -2.96167200 |
| H | -1.11522600 | -6.76044800 | 0.28113400  |
| C | 0.12108700  | -2.72998100 | 0.57956900  |
| C | 0.95315900  | -1.89092300 | 1.31187400  |
| C | 1.62810800  | -2.42024100 | 2.41319800  |
| C | 1.45471400  | -3.78381800 | 2.72844300  |
| C | 0.63506300  | -4.61988600 | 1.98275200  |
| C | -0.04324100 | -4.08475400 | 0.88796100  |
| H | 1.05382600  | -0.84533600 | 1.05215100  |
| H | 1.98238800  | -4.20073400 | 3.58169000  |
| H | 0.53287100  | -5.66968300 | 2.24022200  |
| N | -0.69288600 | -2.39193700 | -0.54361100 |
| H | -0.32944100 | -1.65202500 | -1.17215400 |
| H | -2.83715600 | -5.36779400 | -3.41117600 |
| C | 2.53008200  | -1.55064300 | 3.29450100  |
| C | 2.53946800  | -0.08998700 | 2.83289800  |
| C | 2.02649600  | -1.61808700 | 4.74597500  |
| C | 3.96977400  | -2.07858100 | 3.23050900  |

|   |             |             |             |
|---|-------------|-------------|-------------|
| H | 2.94994100  | 0.00570100  | 1.82161300  |
| H | 1.53674600  | 0.34968500  | 2.83322200  |
| H | 3.17089400  | 0.49854500  | 3.50732100  |
| H | 2.13368000  | -2.62311600 | 5.16574700  |
| H | 2.60357200  | -0.93145500 | 5.37551600  |
| H | 0.96886900  | -1.34360400 | 4.81296600  |
| H | 4.61661900  | -1.49374900 | 3.89471200  |
| H | 4.03394400  | -3.12912300 | 3.53240800  |
| H | 4.35655700  | -1.98909100 | 2.21224500  |
| H | -3.95469400 | -3.61745200 | 2.04731600  |
| C | 5.41629600  | 3.01754400  | -4.35014600 |
| H | 4.82632800  | 3.37675800  | -5.20088700 |
| H | 6.07512400  | 3.83824100  | -4.04713800 |
| H | 6.03933700  | 2.19014600  | -4.69755100 |
| C | -0.21829500 | 6.74997000  | 2.62399200  |
| H | 0.45262500  | 6.48111100  | 3.44752800  |
| H | 0.12887200  | 7.71023500  | 2.22816500  |
| H | -1.21942100 | 6.89342900  | 3.03711300  |

(S)-C6-40°C, TSI<sub>Ar</sub>-1

TSI

Value of imaginary frequency = -332.6 cm<sup>-1</sup>

|   |             |             |             |
|---|-------------|-------------|-------------|
| C | 4.77975500  | 0.84695600  | -1.27799600 |
| C | 5.92882700  | 1.41482500  | -0.71936400 |
| C | 5.86256700  | 2.63060100  | -0.05015900 |
| C | 4.62640100  | 3.25842700  | 0.09001400  |
| C | 3.44753600  | 2.68144800  | -0.40068800 |
| C | 3.54951800  | 1.46604800  | -1.09702100 |
| C | 6.44099100  | -0.82976800 | -1.29452000 |
| C | 7.11621500  | 0.50519800  | -0.93136100 |
| H | 6.75526900  | 3.07986400  | 0.37528900  |
| H | 4.56004300  | 4.20732600  | 0.61502300  |
| H | 6.16530100  | -1.36263900 | -0.37771400 |
| H | 7.74330500  | 0.86892200  | -1.75464500 |
| C | 5.13915200  | -0.41657100 | -2.04061000 |
| C | 4.18126100  | -1.58713900 | -2.18834400 |
| C | 5.46213900  | -0.12854900 | -3.53441100 |
| C | 4.44256300  | -2.26956500 | -3.38331800 |
| C | 3.17624800  | -2.04829000 | -1.34833600 |
| C | 5.46843000  | -1.51708700 | -4.19947400 |
| H | 6.40166900  | 0.41847500  | -3.65522300 |
| C | 3.76411600  | -3.43973300 | -3.69747400 |
| C | 2.48780100  | -3.23794900 | -1.63364500 |
| H | 5.21101400  | -1.48251000 | -5.26159300 |
| C | 2.80462800  | -3.92564300 | -2.80868400 |
| H | 3.96559400  | -3.96537500 | -4.62657000 |
| H | 2.26710900  | -4.84216300 | -3.03425900 |
| H | 7.75176300  | 0.43493100  | -0.04453900 |
| H | 7.07101700  | -1.48861100 | -1.89874700 |
| H | 4.65357400  | 0.47789500  | -3.95706000 |
| H | 6.45415500  | -1.99122400 | -4.11755800 |
| O | 2.80736200  | -1.30226700 | -0.24248300 |
| O | 2.41480100  | 0.83339700  | -1.57244200 |
| P | 1.65741200  | -0.15640500 | -0.50236700 |
| O | 1.47738800  | 0.53229800  | 0.81519100  |
| O | 0.48004200  | -0.71126200 | -1.24461000 |
| H | 0.27228900  | 1.17520100  | 1.95808400  |
| C | 1.39483200  | -3.71740800 | -0.74161900 |
| C | 0.11964700  | -3.72577700 | -1.20862800 |
| C | 1.66597000  | -4.15789300 | 0.61408900  |
| C | -0.99301700 | -4.10239600 | -0.38596100 |
| H | -0.08447900 | -3.37210100 | -2.21556300 |
| C | 0.59519700  | -4.57682700 | 1.44819900  |

|   |             |             |             |
|---|-------------|-------------|-------------|
| C | 2.98506500  | -4.18660900 | 1.12083700  |
| C | -2.31076600 | -3.99672900 | -0.88351600 |
| C | -0.77314200 | -4.52592900 | 0.94732400  |
| C | 0.89495400  | -5.01153800 | 2.75862000  |
| H | 3.80222200  | -3.87180100 | 0.47938100  |
| C | 3.24728700  | -4.61219900 | 2.40443400  |
| C | -3.39279100 | -4.29521000 | -0.08477800 |
| H | -2.45657100 | -3.65555000 | -1.90589300 |
| C | -1.89907400 | -4.83620200 | 1.74130800  |
| C | 2.19058400  | -5.02947400 | 3.23104800  |
| H | 0.09675300  | -5.34037300 | 3.41471400  |
| H | 4.26754100  | -4.62741800 | 2.77456900  |
| C | -3.18004000 | -4.72032900 | 1.23853300  |
| H | -4.40358000 | -4.18538800 | -0.46714900 |
| H | -1.77205300 | -5.14991000 | 2.77134100  |
| H | 2.39235900  | -5.36843000 | 4.24247700  |
| H | -4.02967500 | -4.94798100 | 1.87553200  |
| C | 2.12995600  | 3.35336900  | -0.21027300 |
| C | 1.38726800  | 3.68214700  | -1.30165700 |
| C | 1.64333600  | 3.70477300  | 1.11538000  |
| C | 0.13404600  | 4.37176900  | -1.19990800 |
| H | 1.74905500  | 3.42956100  | -2.29556900 |
| C | 0.40898100  | 4.39602700  | 1.25431900  |
| C | 2.36685500  | 3.36725300  | 2.28248300  |
| C | -0.58868500 | 4.70851300  | -2.36625800 |
| C | -0.38144500 | 4.71382500  | 0.07208300  |
| C | -0.01783500 | 4.76766900  | 2.54942300  |
| H | 3.27401800  | 2.78170800  | 2.18939400  |
| C | 1.93576400  | 3.75987800  | 3.53149800  |
| C | -1.80539500 | 5.34667500  | -2.28174000 |
| H | -0.16830400 | 4.44030000  | -3.33209900 |
| C | -1.63970300 | 5.35656700  | 0.13208700  |
| C | 0.73520400  | 4.47554700  | 3.66633900  |
| H | -0.95329600 | 5.29992000  | 2.67741600  |
| H | 2.51682100  | 3.49857000  | 4.41111800  |
| C | -2.33694500 | 5.66322600  | -1.01769000 |
| H | -2.35878400 | 5.59463200  | -3.18215700 |
| H | -2.07898500 | 5.61196200  | 1.08994300  |
| H | 0.38811300  | 4.77925400  | 4.64884900  |
| H | -3.30453700 | 6.15082400  | -0.94446800 |
| C | -3.29659800 | 2.41715500  | -3.59589900 |
| C | -3.98387900 | 2.66314500  | -2.41657100 |
| C | -3.41627400 | 2.33159900  | -1.17691100 |
| C | -2.12163000 | 1.76117100  | -1.15264100 |

|   |             |             |             |
|---|-------------|-------------|-------------|
| C | -1.43248900 | 1.52217700  | -2.35575700 |
| C | -2.01938300 | 1.84020500  | -3.56926500 |
| H | -5.13536300 | 2.97555100  | 0.00802700  |
| H | -3.75404900 | 2.67322000  | -4.54730300 |
| H | -4.97006600 | 3.11876900  | -2.44009100 |
| C | -4.12328600 | 2.58648100  | 0.06695600  |
| C | -1.53306300 | 1.37772600  | 0.11620800  |
| H | -0.44591700 | 1.06835900  | -2.31065500 |
| H | -1.48800800 | 1.65140400  | -4.49637200 |
| C | -2.16378300 | 1.88035700  | 1.33223300  |
| C | -3.52669400 | 2.38135000  | 1.25659300  |
| H | -0.45532900 | 1.24132300  | 0.12620000  |
| N | -1.60922300 | 1.89524300  | 2.51894700  |
| N | -0.37260300 | 1.50348800  | 2.70235400  |
| C | 0.05911600  | 1.36563700  | 4.02286100  |
| O | -0.55876700 | 1.69933800  | 5.00233100  |
| O | 1.25393500  | 0.77727000  | 4.00982600  |
| C | 1.82946000  | 0.56325400  | 5.30065600  |
| H | 1.18967600  | -0.08740300 | 5.90134600  |
| H | 2.79202600  | 0.08799100  | 5.11989200  |
| H | 1.96603200  | 1.51490800  | 5.81977000  |
| C | -5.94211200 | -1.28049000 | -0.24613900 |
| C | -5.22594400 | -1.02683800 | -1.43006700 |
| C | -3.85006900 | -0.77133900 | -1.34538100 |
| C | -3.24729600 | -0.82598800 | -0.09626000 |
| C | -3.95182000 | -1.14318600 | 1.07180300  |
| C | -5.32410000 | -1.35105500 | 0.99882200  |
| H | -7.01174000 | -1.45980600 | -0.30358100 |
| H | -3.25427800 | -0.56737000 | -2.22870100 |
| H | -5.89771700 | -1.59802200 | 1.88700100  |
| C | -1.70419800 | -1.12370500 | 1.55354900  |
| C | -0.52668400 | -1.41751600 | 2.22856400  |
| C | -0.64222500 | -1.88103600 | 3.53768600  |
| C | -1.89273300 | -2.03841100 | 4.14866400  |
| C | -3.06693500 | -1.77615300 | 3.44923100  |
| C | -2.96561800 | -1.33309400 | 2.13158700  |
| H | 0.44851800  | -1.27048600 | 1.77806800  |
| H | 0.26158800  | -2.12681700 | 4.08678400  |
| H | -1.94596000 | -2.39048100 | 5.17412700  |
| H | -4.03842500 | -1.93489000 | 3.90701300  |
| N | -1.86899000 | -0.61954000 | 0.22057600  |
| H | -1.12512100 | -0.87003000 | -0.46367300 |
| C | -5.97055400 | -1.04568500 | -2.76879200 |
| C | -5.01859600 | -0.89270200 | -3.95740700 |

|   |             |             |             |
|---|-------------|-------------|-------------|
| C | -6.71794400 | -2.38034300 | -2.92648100 |
| C | -6.98210700 | 0.11144700  | -2.79271100 |
| H | -4.48750500 | 0.06339600  | -3.92929400 |
| H | -4.27635400 | -1.69815000 | -3.98347800 |
| H | -5.59041400 | -0.93194000 | -4.88975500 |
| H | -7.45910600 | -2.53311600 | -2.13707800 |
| H | -7.24535900 | -2.39984200 | -3.88629400 |
| H | -6.01859700 | -3.22303100 | -2.90578900 |
| H | -7.52128800 | 0.12291800  | -3.74625900 |
| H | -7.71880300 | 0.01792800  | -1.98861300 |
| H | -6.47133600 | 1.07299100  | -2.67505200 |
| H | -4.02028000 | 2.60575500  | 2.19699400  |

**(S)-C6-40°C, TSII<sub>Ar</sub>-1**

**TSII**

Value of imaginary frequency = -286.3 cm<sup>-1</sup>

|   |             |             |             |
|---|-------------|-------------|-------------|
| C | -0.07756900 | 4.60366700  | -0.03717800 |
| C | -0.25403600 | 5.51375300  | 1.00946100  |
| C | -1.40768900 | 5.48293800  | 1.78336300  |
| C | -2.38475300 | 4.52655900  | 1.50623700  |
| C | -2.20601300 | 3.56700600  | 0.50229600  |
| C | -1.02231100 | 3.61269200  | -0.25021900 |
| C | 2.00596800  | 5.66013800  | 0.28201000  |
| C | 0.95743500  | 6.41040200  | 1.12622800  |
| H | -1.55100300 | 6.19127800  | 2.59416700  |
| H | -3.29967100 | 4.50380500  | 2.09178200  |
| H | 2.49957600  | 4.90004500  | 0.89764200  |
| H | 0.74791700  | 7.40310300  | 0.70931500  |
| C | 1.17426200  | 4.94409800  | -0.82118600 |
| C | 1.99617500  | 3.91217700  | -1.57847100 |
| C | 0.85902000  | 5.94854200  | -1.96752500 |
| C | 2.62170300  | 4.52375100  | -2.67037700 |
| C | 2.24414000  | 2.56634400  | -1.31169100 |
| C | 2.12217500  | 5.93854100  | -2.84389300 |
| H | 0.59867600  | 6.94006900  | -1.58681800 |
| C | 3.55651900  | 3.83784100  | -3.43547100 |
| C | 3.20065100  | 1.86023100  | -2.05584100 |
| H | 1.91755000  | 6.18160500  | -3.89013000 |
| C | 3.85668100  | 2.52042800  | -3.10265100 |
| H | 4.04322500  | 4.31732100  | -4.27980200 |
| H | 4.59791300  | 1.96992400  | -3.67550000 |
| H | 1.27146800  | 6.55429000  | 2.16369100  |
| H | 2.77535700  | 6.31366900  | -0.13916800 |
| H | 0.00787800  | 5.56718400  | -2.54247400 |
| H | 2.86481100  | 6.65913700  | -2.48057700 |
| O | 1.56398200  | 1.93967100  | -0.28494100 |
| O | -0.74296900 | 2.61588500  | -1.16987000 |
| P | 0.05816100  | 1.32944300  | -0.53955400 |
| O | -0.44841200 | 1.02535800  | 0.83911000  |
| O | 0.04019000  | 0.27633300  | -1.60624800 |
| H | -0.88333800 | -0.16284600 | 2.05229900  |
| C | 3.55749500  | 0.43491800  | -1.78047600 |
| C | 2.82166200  | -0.56675300 | -2.32559300 |
| C | 4.77052000  | 0.11896200  | -1.04578000 |
| C | 3.17778100  | -1.94744500 | -2.16369400 |
| H | 1.92602900  | -0.32773700 | -2.88866600 |
| C | 5.18629600  | -1.23380600 | -0.91438400 |

|   |             |             |             |
|---|-------------|-------------|-------------|
| C | 5.56764100  | 1.14035100  | -0.47999600 |
| C | 2.36683600  | -2.95540200 | -2.72585200 |
| C | 4.34433100  | -2.29928700 | -1.44339600 |
| C | 6.41949800  | -1.50013900 | -0.27891600 |
| H | 5.23456000  | 2.17044000  | -0.56052900 |
| C | 6.75580200  | 0.84826600  | 0.15625000  |
| C | 2.67691300  | -4.28732000 | -2.55744000 |
| H | 1.48420900  | -2.65964400 | -3.28797000 |
| C | 4.63382300  | -3.67096200 | -1.27367400 |
| C | 7.19428000  | -0.48363600 | 0.24033400  |
| H | 6.77320200  | -2.52166400 | -0.19538200 |
| H | 7.35466700  | 1.64721400  | 0.58223700  |
| C | 3.81518700  | -4.64391500 | -1.81272000 |
| H | 2.03393900  | -5.05538100 | -2.97813100 |
| H | 5.50223700  | -3.97696300 | -0.70086900 |
| H | 8.13841900  | -0.71556100 | 0.72335400  |
| H | 4.05387600  | -5.69198100 | -1.65901300 |
| C | -3.26449400 | 2.56567200  | 0.18497500  |
| C | -3.81501000 | 2.57981300  | -1.05933800 |
| C | -3.75134600 | 1.61418300  | 1.16983700  |
| C | -4.88950800 | 1.70868200  | -1.43716300 |
| H | -3.45158100 | 3.28902900  | -1.79912700 |
| C | -4.80545700 | 0.72290700  | 0.82745600  |
| C | -3.18511200 | 1.54160000  | 2.46288600  |
| C | -5.44888700 | 1.78762300  | -2.73141600 |
| C | -5.39967300 | 0.77576600  | -0.50277400 |
| C | -5.24676800 | -0.20423100 | 1.79766400  |
| H | -2.34818000 | 2.18634900  | 2.70799400  |
| C | -3.65892700 | 0.64577200  | 3.39804800  |
| C | -6.48838500 | 0.96226700  | -3.10139100 |
| H | -5.04262400 | 2.51467000  | -3.42965300 |
| C | -6.46134600 | -0.06246400 | -0.90914100 |
| C | -4.69396700 | -0.24049300 | 3.06052000  |
| H | -6.03772600 | -0.90465000 | 1.55534700  |
| H | -3.22165500 | 0.61228400  | 4.39242000  |
| C | -6.99527100 | 0.02886100  | -2.17894000 |
| H | -6.91562700 | 1.03135400  | -4.09698300 |
| H | -6.87310800 | -0.79431200 | -0.22340000 |
| H | -5.05635800 | -0.95865300 | 3.78941500  |
| H | -7.81291000 | -0.62511400 | -2.46622100 |
| C | -4.54704400 | -2.54429400 | -2.95502700 |
| C | -4.47574500 | -3.40505400 | -1.86997300 |
| C | -3.61986300 | -3.12298000 | -0.79491100 |
| C | -2.84988300 | -1.93463700 | -0.83556700 |



|   |             |             |             |
|---|-------------|-------------|-------------|
| C | -2.93701400 | -1.06490500 | -1.94069300 |
| C | -3.77466700 | -1.37294400 | -2.99721500 |
| H | -4.06991200 | -4.94353400 | 0.32671900  |
| H | -5.20890900 | -2.77923100 | -3.78334000 |
| H | -5.07350600 | -4.31152600 | -1.84752000 |
| C | -3.50889100 | -4.01421400 | 0.34758000  |
| C | -1.92740200 | -1.64976400 | 0.23009300  |
| H | -2.31720400 | -0.17108600 | -1.95505100 |
| H | -3.84153600 | -0.70764500 | -3.85110700 |
| C | -2.04410700 | -2.41728300 | 1.45767100  |
| C | -2.76095100 | -3.68244800 | 1.41832800  |
| H | -1.54106900 | -0.63546800 | 0.28352800  |
| N | -1.60050000 | -2.03714800 | 2.63173800  |
| N | -1.03668300 | -0.86726500 | 2.80091300  |
| C | -0.74008200 | -0.48288300 | 4.10862300  |
| O | -0.82145500 | -1.18321700 | 5.08615100  |
| O | -0.36349900 | 0.79570100  | 4.08660600  |
| C | 0.03814100  | 1.33994800  | 5.34899000  |
| H | 0.90837100  | 0.80421200  | 5.73462800  |
| H | 0.29142400  | 2.37928400  | 5.14832300  |
| H | -0.78077400 | 1.27779100  | 6.06881200  |
| C | -0.62292000 | -6.29590000 | -1.73165000 |
| C | -1.20180100 | -5.31348300 | -2.53860300 |
| C | -1.06824200 | -3.95576500 | -2.23639000 |
| C | -0.34565700 | -3.62726800 | -1.09898000 |
| C | 0.28331600  | -4.60219400 | -0.30323400 |
| C | 0.13733700  | -5.94887200 | -0.61317700 |
| H | -0.74853400 | -7.34240200 | -1.99056300 |
| H | -1.50560300 | -3.19270800 | -2.87252400 |
| H | 0.61926600  | -6.71212900 | -0.00979200 |
| C | 0.86253400  | -2.51956400 | 0.47824600  |
| C | 1.52091100  | -1.53659400 | 1.20817700  |
| C | 2.42295500  | -1.93251600 | 2.19671300  |
| C | 2.63875300  | -3.31008700 | 2.40920300  |
| C | 1.97949800  | -4.28661600 | 1.67485700  |
| C | 1.07240200  | -3.88609300 | 0.69421500  |
| H | 1.31195200  | -0.48881300 | 1.03279500  |
| H | 3.34668700  | -3.62346600 | 3.17114200  |
| H | 2.17373300  | -5.33959300 | 1.85457600  |
| N | -0.11009600 | -2.33776000 | -0.54793600 |
| H | 0.01168500  | -1.50920900 | -1.16056700 |
| H | -1.76864300 | -5.60397800 | -3.41739000 |
| C | 3.16820400  | -0.90791000 | 3.05722900  |
| C | 2.75462600  | 0.52753400  | 2.71864300  |

|   |             |             |            |
|---|-------------|-------------|------------|
| C | 2.86832500  | -1.18057800 | 4.54038200 |
| C | 4.67818000  | -1.03612100 | 2.80986900 |
| H | 3.00386300  | 0.78234400  | 1.68250900 |
| H | 1.68075800  | 0.69171900  | 2.85419800 |
| H | 3.28990100  | 1.22312800  | 3.37399400 |
| H | 3.24642800  | -2.15737400 | 4.85794200 |
| H | 3.34926500  | -0.41944800 | 5.16485800 |
| H | 1.79139100  | -1.16327300 | 4.73940600 |
| H | 5.22731300  | -0.34071400 | 3.45529500 |
| H | 5.04192100  | -2.04809000 | 3.01631500 |
| H | 4.91071400  | -0.79291100 | 1.76981800 |
| H | -2.70797100 | -4.31087800 | 2.30132900 |

**(S)-C7****TSI**Value of imaginary frequency = -327.8 cm<sup>-1</sup>

|   |             |             |             |
|---|-------------|-------------|-------------|
| C | 4.26921700  | -0.29253900 | -0.85272100 |
| C | 5.41623200  | -0.99028800 | -0.46275600 |
| C | 5.35978800  | -2.36855400 | -0.33909100 |
| C | 4.17089200  | -3.05616300 | -0.55407400 |
| C | 2.99918300  | -2.36389900 | -0.87793600 |
| C | 3.07010100  | -0.96947700 | -1.03321400 |
| C | 5.82557000  | 1.30897000  | -0.07720600 |
| C | 6.55475900  | -0.04221500 | -0.19076400 |
| H | 4.14068600  | -4.13577700 | -0.44771200 |
| H | 5.45749400  | 1.44031600  | 0.94601000  |
| H | 7.27315500  | -0.05004500 | -1.01962800 |
| C | 4.60559300  | 1.17800000  | -1.03372700 |
| C | 3.58913500  | 2.28226000  | -0.79516600 |
| C | 5.04728600  | 1.50653000  | -2.48770200 |
| C | 3.90370000  | 3.38398200  | -1.59970600 |
| C | 2.50568000  | 2.34580200  | 0.06939000  |
| C | 5.01001300  | 3.04442400  | -2.56532400 |
| H | 6.02695500  | 1.08249800  | -2.72403300 |
| C | 3.18381500  | 4.55738900  | -1.45615800 |
| C | 1.76740800  | 3.53207300  | 0.21278000  |
| H | 4.80028700  | 3.41481800  | -3.57254800 |
| C | 2.12971600  | 4.64365400  | -0.55062900 |
| H | 1.57061400  | 5.56752700  | -0.44735000 |
| H | 7.10336700  | -0.31036900 | 0.71599900  |
| H | 6.45375400  | 2.16693600  | -0.33078100 |
| H | 4.31242400  | 1.08741400  | -3.18288000 |
| H | 5.95790000  | 3.49324600  | -2.24420900 |
| O | 2.11609000  | 1.21586500  | 0.76039900  |
| O | 1.93363000  | -0.24018500 | -1.31642600 |
| P | 1.04664500  | 0.23421700  | -0.01321800 |
| O | 0.81074200  | -0.91617500 | 0.91393800  |
| O | -0.09508800 | 1.01090700  | -0.59342500 |
| H | -0.49137900 | -2.03601000 | 1.54834100  |
| C | 0.57673800  | 3.58364000  | 1.10646600  |
| C | -0.65084100 | 3.76147500  | 0.55366200  |
| C | 0.70538800  | 3.41846100  | 2.54192600  |
| C | -1.85115300 | 3.73453500  | 1.33807000  |
| H | -0.74562500 | 3.85876700  | -0.52455000 |
| C | -0.45757200 | 3.42065700  | 3.35638800  |
| C | 1.97178500  | 3.26247800  | 3.15000300  |
| C | -3.11284600 | 3.82835000  | 0.70973900  |

|   |             |             |             |
|---|-------------|-------------|-------------|
| C | -1.77120200 | 3.55951500  | 2.74107900  |
| C | -0.30112700 | 3.26345700  | 4.75186600  |
| H | 2.86096600  | 3.27032100  | 2.52740500  |
| C | 2.09395700  | 3.10775300  | 4.51319400  |
| C | -4.27437600 | 3.75006200  | 1.44645600  |
| H | -3.14989500 | 3.94842600  | -0.37049300 |
| C | -2.97681100 | 3.48867100  | 3.47354900  |
| C | 0.94464600  | 3.10750800  | 5.32186700  |
| H | -1.17375400 | 3.26653700  | 5.39530400  |
| H | 3.07536500  | 2.98899500  | 4.96138800  |
| C | -4.20047800 | 3.57873000  | 2.84056900  |
| H | -5.24102400 | 3.80543400  | 0.95402900  |
| H | -2.95540500 | 3.33568300  | 4.54684700  |
| H | 1.03629500  | 2.98882100  | 6.39706400  |
| H | -5.11344800 | 3.50550600  | 3.42426000  |
| C | 1.72163300  | -3.10480600 | -1.08491800 |
| C | 1.10596100  | -3.03416500 | -2.29580800 |
| C | 1.15924000  | -3.94742700 | -0.04124000 |
| C | -0.09663800 | -3.75958200 | -2.58699700 |
| H | 1.53393600  | -2.41854200 | -3.08369400 |
| C | -0.02609700 | -4.68854500 | -0.29835500 |
| C | 1.76200500  | -4.04868600 | 1.23362600  |
| C | -0.69322600 | -3.66515600 | -3.86382700 |
| C | -0.69355700 | -4.56302800 | -1.58780900 |
| C | -0.52020600 | -5.54680800 | 0.70981900  |
| H | 2.62578000  | -3.43445900 | 1.46131500  |
| C | 1.26669600  | -4.90665600 | 2.19239400  |
| C | -1.87102200 | -4.32223600 | -4.14134900 |
| H | -0.20988600 | -3.04994500 | -4.61823400 |
| C | -1.91209100 | -5.21209600 | -1.89241300 |
| C | 0.12070000  | -5.67275200 | 1.92365300  |
| H | -1.41375000 | -6.13334700 | 0.52939800  |
| H | 1.75741900  | -4.97866100 | 3.15880200  |
| C | -2.48961100 | -5.09233800 | -3.13913600 |
| H | -2.32872900 | -4.23623900 | -5.12205900 |
| H | -2.41777300 | -5.80600500 | -1.13966300 |
| H | -0.27405900 | -6.34741500 | 2.67663500  |
| H | -3.42964500 | -5.59522900 | -3.34550500 |
| C | -3.28098100 | -1.05975500 | -4.47880500 |
| C | -4.09500700 | -1.74148300 | -3.58654100 |
| C | -3.70110800 | -1.91446100 | -2.25114600 |
| C | -2.45118800 | -1.39508300 | -1.83801000 |
| C | -1.63290400 | -0.70905500 | -2.75423700 |
| C | -2.04720300 | -0.53791700 | -4.06410000 |

|   |             |             |             |
|---|-------------|-------------|-------------|
| H | -5.50953100 | -2.98097800 | -1.64444400 |
| H | -3.60276500 | -0.93018000 | -5.50815500 |
| H | -5.04517900 | -2.15427200 | -3.91406000 |
| C | -4.53483900 | -2.64126300 | -1.30747200 |
| C | -2.04373500 | -1.53586200 | -0.45593600 |
| H | -0.68395000 | -0.30762200 | -2.40945100 |
| H | -1.41569500 | -0.00789400 | -4.76963300 |
| C | -2.77843800 | -2.48445900 | 0.37378600  |
| C | -4.09277100 | -2.92367600 | -0.06714900 |
| H | -0.98603900 | -1.39781900 | -0.24954200 |
| N | -2.36538700 | -2.95688100 | 1.52282900  |
| N | -1.18632400 | -2.65119900 | 2.00760100  |
| C | -0.93113800 | -3.03209600 | 3.32652400  |
| O | -1.63528900 | -3.74387600 | 3.99693800  |
| O | 0.20259800  | -2.45374100 | 3.71801700  |
| C | 0.60184300  | -2.76762800 | 5.05467200  |
| H | -0.14025600 | -2.40407200 | 5.76914900  |
| H | 1.55353100  | -2.26068200 | 5.20420400  |
| H | 0.72156900  | -3.84678000 | 5.17411900  |
| C | -6.51684700 | 1.06375700  | -0.46583600 |
| C | -5.60956300 | 1.30316400  | -1.51366900 |
| C | -4.25001900 | 1.03150200  | -1.30487800 |
| C | -3.85463800 | 0.58063300  | -0.05311700 |
| C | -4.75152700 | 0.40982000  | 1.00900800  |
| C | -6.10655000 | 0.63186100  | 0.79236300  |
| H | -7.57383700 | 1.25198900  | -0.62958300 |
| H | -3.51056200 | 1.20041100  | -2.08004300 |
| H | -6.82813300 | 0.50479200  | 1.59362600  |
| C | -2.60957500 | 0.18038600  | 1.80975400  |
| C | -1.56920700 | 0.16181200  | 2.72994100  |
| C | -1.91214800 | 0.05689300  | 4.07676500  |
| C | -3.24969300 | -0.02751800 | 4.48357000  |
| C | -4.28464700 | 0.02958000  | 3.55482400  |
| C | -3.95572200 | 0.15252100  | 2.20613300  |
| H | -0.52940500 | 0.19309700  | 2.41989700  |
| H | -1.12042700 | 0.04187200  | 4.81975400  |
| H | -3.48143600 | -0.11776100 | 5.54027100  |
| H | -5.32234100 | 0.00440400  | 3.87261500  |
| N | -2.53334700 | 0.25809600  | 0.38096100  |
| H | -1.70981100 | 0.76221200  | -0.01762400 |
| C | -6.13230900 | 1.86867500  | -2.83878800 |
| C | -4.99621600 | 2.20814100  | -3.80638800 |
| C | -6.92909000 | 3.15646100  | -2.56893300 |
| C | -7.05174200 | 0.83122400  | -3.50201300 |

|    |             |             |             |
|----|-------------|-------------|-------------|
| H  | -4.41790400 | 1.32044000  | -4.07934100 |
| H  | -4.31015700 | 2.94811800  | -3.37982600 |
| H  | -5.41509600 | 2.62933000  | -4.72551000 |
| H  | -7.80609700 | 2.97281700  | -1.94206800 |
| H  | -7.28081600 | 3.58132300  | -3.51523900 |
| H  | -6.30331600 | 3.90522000  | -2.07140500 |
| H  | -7.45029200 | 1.22693800  | -4.44264700 |
| H  | -7.89844500 | 0.57468700  | -2.85745200 |
| H  | -6.50038200 | -0.08835500 | -3.72482800 |
| H  | -4.67847400 | -3.50619400 | 0.63681100  |
| Br | 3.63364600  | 6.06313000  | -2.51752300 |
| Br | 6.92096400  | -3.32692400 | 0.15212900  |

**(S)-C7****TSII**Value of imaginary frequency = -291.5 cm<sup>-1</sup>

|   |             |             |             |
|---|-------------|-------------|-------------|
| C | 2.95368400  | -2.71024200 | -0.11005600 |
| C | 3.40860700  | -3.61476400 | 0.85259200  |
| C | 2.56160300  | -4.62151200 | 1.28481800  |
| C | 1.26236200  | -4.72331700 | 0.79597900  |
| C | 0.77537400  | -3.77909100 | -0.11306600 |
| C | 1.64147800  | -2.76389500 | -0.54913600 |
| C | 4.98560400  | -1.84646800 | 0.72600300  |
| C | 4.81010200  | -3.27217200 | 1.28613100  |
| H | 0.61224100  | -5.52275700 | 1.13695000  |
| H | 4.59558500  | -1.11921100 | 1.44597800  |
| H | 5.53310900  | -3.97403700 | 0.85288800  |
| C | 4.09433400  | -1.81621100 | -0.54954900 |
| C | 3.88429700  | -0.40163300 | -1.06853200 |
| C | 4.87098800  | -2.44787900 | -1.74007100 |
| C | 4.90601700  | -0.09301700 | -1.97211400 |
| C | 2.93775800  | 0.56399200  | -0.73186300 |
| C | 5.74364400  | -1.30500600 | -2.28283700 |
| H | 5.44456300  | -3.32699500 | -1.43474400 |
| C | 5.02554000  | 1.20027500  | -2.45282600 |
| C | 3.07007700  | 1.87946400  | -1.20118300 |
| H | 5.95112100  | -1.39534000 | -3.35253400 |
| C | 4.13314200  | 2.18734800  | -2.05714000 |
| H | 4.24617600  | 3.20491500  | -2.41691800 |
| H | 4.92371600  | -3.32091400 | 2.37257400  |
| H | 6.02613600  | -1.59271000 | 0.50624700  |
| H | 4.15073000  | -2.75477800 | -2.50594800 |
| H | 6.71070700  | -1.24647500 | -1.76821500 |
| O | 1.88876500  | 0.22587700  | 0.09648000  |
| O | 1.17033300  | -1.74904000 | -1.36040900 |
| P | 0.53849400  | -0.47503200 | -0.53723100 |
| O | -0.21497800 | -0.95812000 | 0.66441100  |
| O | -0.12212900 | 0.39580000  | -1.56110900 |
| H | -1.53388500 | -0.70751900 | 1.78348500  |
| C | 2.16837000  | 2.99562200  | -0.78086700 |
| C | 0.98985200  | 3.21929900  | -1.41663700 |
| C | 2.63318000  | 3.92823800  | 0.23218900  |
| C | 0.16861800  | 4.35664600  | -1.10872200 |
| H | 0.64702300  | 2.52427400  | -2.17656700 |
| C | 1.87341100  | 5.09238200  | 0.52372100  |
| C | 3.84490200  | 3.70689700  | 0.92710800  |
| C | -1.05613200 | 4.54557500  | -1.78351900 |

|   |             |             |             |
|---|-------------|-------------|-------------|
| C | 0.59150500  | 5.29696900  | -0.13885600 |
| C | 2.39574600  | 6.02183200  | 1.45108300  |
| H | 4.41110500  | 2.80330500  | 0.72421600  |
| C | 4.31582000  | 4.61808800  | 1.84832600  |
| C | -1.86674400 | 5.62099300  | -1.49071200 |
| H | -1.35294700 | 3.81920500  | -2.53633800 |
| C | -0.25849300 | 6.38768000  | 0.14657100  |
| C | 3.59298700  | 5.79592800  | 2.09808800  |
| H | 1.84945700  | 6.93252800  | 1.66914800  |
| H | 5.24813700  | 4.42890500  | 2.37101600  |
| C | -1.46329700 | 6.54388200  | -0.51003900 |
| H | -2.81619000 | 5.74559800  | -2.00375900 |
| H | 0.02247900  | 7.11510700  | 0.89985900  |
| H | 3.97052200  | 6.52585300  | 2.80727900  |
| H | -2.10129400 | 7.38756800  | -0.26541600 |
| C | -0.61266300 | -3.86390300 | -0.64899400 |
| C | -0.78061400 | -4.00726600 | -1.99099300 |
| C | -1.77491400 | -3.81796700 | 0.22102200  |
| C | -2.07513600 | -4.14882100 | -2.59140600 |
| H | 0.08954100  | -4.03549900 | -2.64216400 |
| C | -3.07592800 | -3.93367500 | -0.34044400 |
| C | -1.64387900 | -3.63898400 | 1.61688900  |
| C | -2.19737300 | -4.32858300 | -3.98693300 |
| C | -3.23291800 | -4.11769100 | -1.77798600 |
| C | -4.19203600 | -3.85912800 | 0.52290100  |
| H | -0.65579600 | -3.49561600 | 2.04011500  |
| C | -2.75097700 | -3.60898400 | 2.43764300  |
| C | -3.43621700 | -4.47544100 | -4.57170800 |
| H | -1.29324800 | -4.35058200 | -4.58959700 |
| C | -4.49028800 | -4.26500100 | -2.40364200 |
| C | -4.03809100 | -3.71071700 | 1.88512500  |
| H | -5.19476000 | -3.92156600 | 0.11570300  |
| H | -2.63090200 | -3.48757000 | 3.51119400  |
| C | -4.59066600 | -4.44115100 | -3.76863200 |
| H | -3.52335900 | -4.61674200 | -5.64456000 |
| H | -5.39957000 | -4.24337100 | -1.81383500 |
| H | -4.91199800 | -3.66454800 | 2.52729500  |
| H | -5.56961100 | -4.55382600 | -4.22454200 |
| C | -5.04294500 | -0.85037500 | -3.87493100 |
| C | -5.79205700 | -0.47859600 | -2.76881100 |
| C | -5.17013500 | -0.25734100 | -1.53138500 |
| C | -3.76923600 | -0.44013100 | -1.43381700 |
| C | -3.02070700 | -0.82475200 | -2.56301100 |
| C | -3.65366300 | -1.02098500 | -3.77792500 |



|   |             |             |             |
|---|-------------|-------------|-------------|
| H | -6.99300500 | 0.33740400  | -0.48306700 |
| H | -5.53714900 | -1.01184000 | -4.82840700 |
| H | -6.86658300 | -0.34308900 | -2.85212000 |
| C | -5.93009500 | 0.15209700  | -0.36190700 |
| C | -3.09984200 | -0.16222600 | -0.18693000 |
| H | -1.94241500 | -0.93128500 | -2.46598300 |
| H | -3.07933200 | -1.31261700 | -4.65066900 |
| C | -3.92373100 | -0.02346600 | 1.00570000  |
| C | -5.34087000 | 0.26316000  | 0.84405500  |
| H | -2.09588900 | -0.56305900 | -0.07614100 |
| N | -3.50854600 | -0.19916300 | 2.23572200  |
| N | -2.27269600 | -0.54894100 | 2.49626400  |
| C | -1.96610200 | -0.88506000 | 3.81348300  |
| O | -2.71275600 | -0.80410500 | 4.75613100  |
| O | -0.70659500 | -1.32209900 | 3.84355900  |
| C | -0.22783600 | -1.73528500 | 5.12813700  |
| H | -0.33075100 | -0.92898600 | 5.85689700  |
| H | 0.82182500  | -1.98341400 | 4.98000600  |
| H | -0.78145700 | -2.61242400 | 5.47132100  |
| C | -5.61982400 | 4.13238000  | -1.50205300 |
| C | -5.11002400 | 3.28922100  | -2.49213100 |
| C | -4.00806300 | 2.46630600  | -2.24539900 |
| C | -3.44797900 | 2.52251400  | -0.97893300 |
| C | -3.91941600 | 3.39838000  | 0.01483500  |
| C | -5.02202500 | 4.20438100  | -0.24234900 |
| H | -6.48103500 | 4.75457000  | -1.72359700 |
| H | -3.60771900 | 1.81492300  | -3.01594600 |
| H | -5.39977500 | 4.88676200  | 0.51278500  |
| C | -2.02692900 | 2.34777800  | 0.79241100  |
| C | -0.92617200 | 2.06999300  | 1.59437700  |
| C | -0.80676000 | 2.73950200  | 2.81359900  |
| C | -1.79593700 | 3.67653900  | 3.17517300  |
| C | -2.88211700 | 3.96380100  | 2.35983500  |
| C | -2.99915900 | 3.29048800  | 1.14389900  |
| H | -0.19296000 | 1.33353900  | 1.29180700  |
| H | -1.70477400 | 4.19883800  | 4.12312000  |
| H | -3.61752700 | 4.70458500  | 2.65846300  |
| N | -2.37152400 | 1.74754700  | -0.45770000 |
| H | -1.58420900 | 1.45750700  | -1.06610500 |
| H | -5.57615400 | 3.26632400  | -3.47206000 |
| C | 0.35343400  | 2.46047700  | 3.77361000  |
| C | 1.29267600  | 1.37984300  | 3.22990000  |
| C | -0.21601100 | 2.00378000  | 5.12727000  |
| C | 1.17265500  | 3.74241400  | 3.97799200  |

|    |             |             |             |
|----|-------------|-------------|-------------|
| H  | 1.75902900  | 1.69802600  | 2.29082900  |
| H  | 0.77273600  | 0.43383700  | 3.04550100  |
| H  | 2.09035500  | 1.19578500  | 3.95746300  |
| H  | -0.78095800 | 2.80308200  | 5.61686600  |
| H  | 0.60001000  | 1.71261400  | 5.79807000  |
| H  | -0.88939700 | 1.14901200  | 5.00979300  |
| H  | 1.97657500  | 3.56359500  | 4.70139600  |
| H  | 0.55684300  | 4.56668800  | 4.35277100  |
| H  | 1.62577200  | 4.05445800  | 3.03356000  |
| H  | -5.89994500 | 0.51707400  | 1.73873200  |
| Br | 3.19249200  | -5.87206300 | 2.56401900  |
| Br | 6.43771800  | 1.62244000  | -3.64638000 |

**(S)-C8****TSI**Value of imaginary frequency = -315.3 cm<sup>-1</sup>

|   |             |             |             |
|---|-------------|-------------|-------------|
| H | -0.29327900 | 1.69608200  | 1.84644700  |
| C | -3.25257300 | 2.09090100  | -4.12080400 |
| C | -4.07896500 | 2.46139100  | -3.06909200 |
| C | -3.67353500 | 2.26410400  | -1.74134800 |
| C | -2.39946700 | 1.69424400  | -1.49766000 |
| C | -1.57471700 | 1.31587400  | -2.57362900 |
| C | -2.00027600 | 1.50998500  | -3.87668100 |
| H | -5.51157000 | 3.03534100  | -0.84249400 |
| H | -3.58160200 | 2.25099600  | -5.14342500 |
| H | -5.04550600 | 2.91769200  | -3.26362200 |
| C | -4.51080400 | 2.67396900  | -0.62583900 |
| C | -1.94893800 | 1.50783400  | -0.13722400 |
| H | -0.61111300 | 0.86118900  | -2.35918400 |
| H | -1.36333500 | 1.22261500  | -4.70658500 |
| C | -2.68233400 | 2.20187700  | 0.91092700  |
| C | -4.03725000 | 2.65448900  | 0.63453600  |
| H | -0.88264200 | 1.35709800  | -0.00108100 |
| N | -2.21799300 | 2.47077300  | 2.10631300  |
| N | -0.99165300 | 2.16908900  | 2.45268000  |
| C | -0.63171100 | 2.40601100  | 3.78265300  |
| O | -1.28664600 | 3.02022100  | 4.58586000  |
| O | 0.54150900  | 1.82093000  | 4.00419900  |
| C | 1.06873400  | 2.01281100  | 5.31897500  |
| H | 1.18641800  | 3.07806900  | 5.53105600  |
| H | 2.03618600  | 1.51361000  | 5.32451100  |
| H | 0.40445300  | 1.56427600  | 6.06129100  |
| C | -6.40459600 | -0.98140000 | -0.35491800 |
| C | -5.60875100 | -0.95982200 | -1.51573600 |
| C | -4.22453800 | -0.79195000 | -1.38226800 |
| C | -3.69723200 | -0.68878400 | -0.10209800 |
| C | -4.48365800 | -0.77470700 | 1.05484400  |
| C | -5.86243400 | -0.90367900 | 0.92401600  |
| H | -7.48027800 | -1.09211100 | -0.45553300 |
| H | -3.56480800 | -0.77014100 | -2.24285400 |
| H | -6.50174700 | -0.96191500 | 1.79963400  |
| C | -2.27063800 | -0.70765200 | 1.67202300  |
| C | -1.14231100 | -0.84945400 | 2.47093300  |
| C | -1.34634900 | -1.01476200 | 3.83829900  |
| C | -2.63665400 | -1.04569100 | 4.38304800  |
| C | -3.76010400 | -0.94555700 | 3.56813300  |
| C | -3.57102800 | -0.78821600 | 2.19561400  |

|   |             |             |             |
|---|-------------|-------------|-------------|
| H | -0.13815500 | -0.80962900 | 2.06467500  |
| H | -0.48536300 | -1.13142200 | 4.48894400  |
| H | -2.76051900 | -1.17518900 | 5.45371500  |
| H | -4.76019200 | -1.00524800 | 3.98587700  |
| N | -2.33986100 | -0.46919100 | 0.26589900  |
| H | -1.55284800 | -0.82864200 | -0.30952900 |
| C | -6.27867700 | -1.13001800 | -2.88317900 |
| C | -5.25448300 | -1.18823900 | -4.01962200 |
| C | -7.22180100 | 0.05757500  | -3.13281900 |
| C | -7.08957200 | -2.43659600 | -2.90051800 |
| H | -4.55480300 | -2.02164400 | -3.89098400 |
| H | -4.67576600 | -0.26178000 | -4.08895000 |
| H | -5.77410100 | -1.33106900 | -4.97217100 |
| H | -8.00108000 | 0.12203600  | -2.36714300 |
| H | -7.71268900 | -0.04922300 | -4.10632500 |
| H | -6.66357200 | 0.99991900  | -3.13180200 |
| H | -7.56066600 | -2.56868100 | -3.88039600 |
| H | -7.88184700 | -2.43697100 | -2.14645300 |
| H | -6.44274300 | -3.30042100 | -2.71381100 |
| H | -4.62055000 | 3.01000900  | 1.47789200  |
| C | 6.22117100  | -3.07773400 | -3.69178600 |
| C | 5.67989200  | -2.17730100 | -2.80867400 |
| C | 4.61798600  | -2.55369700 | -1.94040400 |
| C | 4.10114300  | -3.87827400 | -2.04139000 |
| C | 4.69145600  | -4.79043500 | -2.95725000 |
| C | 5.73192100  | -4.40420600 | -3.76189600 |
| H | 7.02870200  | -2.76822600 | -4.34789600 |
| H | 6.05577700  | -1.16018700 | -2.77476400 |
| C | 4.02278400  | -1.64240000 | -1.00778200 |
| C | 2.98071600  | -4.26294300 | -1.25869800 |
| H | 4.29028200  | -5.79881700 | -3.01297100 |
| H | 6.17260000  | -5.10640700 | -4.46235400 |
| C | 2.36711700  | -3.37732300 | -0.40842500 |
| C | 2.91299500  | -2.06806200 | -0.30016300 |
| H | 2.58982200  | -5.27208900 | -1.36368500 |
| C | 4.48968300  | -0.23705200 | -0.81490500 |
| C | 5.82155800  | 0.10563900  | -0.41014200 |
| C | 3.56333900  | 0.78081500  | -0.93734500 |
| C | 6.15170700  | 1.47925100  | -0.21822200 |
| C | 6.82541300  | -0.86912400 | -0.15470500 |
| C | 3.85578800  | 2.14996200  | -0.67802200 |
| C | 7.47385700  | 1.83332900  | 0.16417500  |
| C | 5.14959900  | 2.47591900  | -0.35435800 |
| C | 8.09104200  | -0.49577100 | 0.22324100  |

|   |             |             |             |
|---|-------------|-------------|-------------|
| H | 6.58035800  | -1.92127000 | -0.25131500 |
| C | 8.42718000  | 0.87083500  | 0.37325800  |
| H | 7.70755600  | 2.88636500  | 0.29673100  |
| H | 5.41353500  | 3.51213100  | -0.15674100 |
| H | 8.84134900  | -1.25693900 | 0.41328000  |
| H | 9.43388300  | 1.15064100  | 0.66683000  |
| O | 2.28054300  | 0.45833900  | -1.31935100 |
| O | 2.28625900  | -1.19006400 | 0.55649000  |
| P | 1.28161900  | -0.09471200 | -0.14335700 |
| O | 1.02238500  | 0.94208500  | 0.90337900  |
| O | 0.14784800  | -0.75686100 | -0.86048400 |
| C | 2.73449000  | 3.13421100  | -0.70455600 |
| C | 2.07115300  | 3.36657800  | -1.86682000 |
| C | 2.26582800  | 3.74690000  | 0.52771000  |
| C | 0.90490100  | 4.19891200  | -1.92959400 |
| H | 2.40448300  | 2.88651600  | -2.78381900 |
| C | 1.09784000  | 4.55582500  | 0.50943200  |
| C | 2.91918400  | 3.51717600  | 1.75970400  |
| C | 0.23632000  | 4.39442000  | -3.15869000 |
| C | 0.39684500  | 4.78943300  | -0.74747700 |
| C | 0.63052800  | 5.09380600  | 1.73064100  |
| H | 3.79251400  | 2.87547400  | 1.78204300  |
| C | 2.45393500  | 4.07271600  | 2.93068300  |
| C | -0.90995900 | 5.15501000  | -3.22576600 |
| H | 0.64101800  | 3.92297300  | -4.05068100 |
| C | -0.77786500 | 5.56945400  | -0.84547400 |
| C | 1.29469800  | 4.86677800  | 2.91746700  |
| H | -0.27073100 | 5.69572100  | 1.74705500  |
| H | 2.97219800  | 3.88015400  | 3.86552400  |
| C | -1.41789600 | 5.74722800  | -2.05515200 |
| H | -1.42211200 | 5.29312500  | -4.17292900 |
| H | -1.19908500 | 6.03756000  | 0.03685300  |
| H | 0.91137000  | 5.29168800  | 3.84070000  |
| H | -2.32201700 | 6.34642100  | -2.09995800 |
| C | 1.15230200  | -3.72104400 | 0.39079400  |
| C | 1.26170000  | -3.89277400 | 1.73404200  |
| C | -0.15068500 | -3.80241900 | -0.24472300 |
| C | 0.12132300  | -4.15611200 | 2.56500800  |
| H | 2.23477800  | -3.81171700 | 2.21261100  |
| C | -1.30599900 | -4.03012800 | 0.54885900  |
| C | -0.29937500 | -3.61735000 | -1.63777100 |
| C | 0.27804300  | -4.32817200 | 3.95826000  |
| C | -1.17018500 | -4.21351600 | 1.98798400  |
| C | -2.56713000 | -4.05824000 | -0.08916100 |

|   |             |             |             |
|---|-------------|-------------|-------------|
| H | 0.58076300  | -3.41181700 | -2.23676500 |
| C | -1.53964500 | -3.66121200 | -2.23544900 |
| C | -0.81414200 | -4.55003700 | 4.76835800  |
| H | 1.27908500  | -4.27721400 | 4.37847800  |
| C | -2.27329500 | -4.43551600 | 2.84193600  |
| C | -2.68462600 | -3.88401600 | -1.45179400 |
| H | -3.46702700 | -4.22055000 | 0.49367300  |
| H | -1.63290600 | -3.51297800 | -3.30709200 |
| C | -2.10012100 | -4.60280900 | 4.20058000  |
| H | -0.68553700 | -4.68108100 | 5.83831500  |
| H | -3.27800600 | -4.47584000 | 2.43655200  |
| H | -3.66610300 | -3.91454800 | -1.91578600 |
| H | -2.96486200 | -4.77158700 | 4.83515400  |

**(S)-C8****TSII**Value of imaginary frequency = -238.4 cm<sup>-1</sup>

|   |             |             |             |
|---|-------------|-------------|-------------|
| H | 1.29508600  | -0.36695100 | 2.03434900  |
| C | 5.37989200  | -1.16397600 | -3.11989500 |
| C | 5.90810400  | -0.32647700 | -2.14926200 |
| C | 5.12068000  | 0.08328600  | -1.06282800 |
| C | 3.78022100  | -0.37198000 | -0.98988600 |
| C | 3.25230900  | -1.21589800 | -1.98830900 |
| C | 4.05107100  | -1.61414400 | -3.04368100 |
| H | 6.65532800  | 1.31786700  | -0.11705000 |
| H | 6.00228700  | -1.47596700 | -3.95320400 |
| H | 6.93590700  | 0.01755700  | -2.21871400 |
| C | 5.64834600  | 0.92769200  | -0.00533100 |
| C | 2.95527500  | 0.06419700  | 0.09346000  |
| H | 2.21250500  | -1.52599700 | -1.91694700 |
| H | 3.65547300  | -2.27227300 | -3.80956800 |
| C | 3.60198800  | 0.60406300  | 1.26753000  |
| C | 4.93688100  | 1.16150000  | 1.11726300  |
| H | 1.98753500  | -0.41543300 | 0.20161300  |
| N | 3.11522000  | 0.55928800  | 2.48570800  |
| N | 1.96139100  | -0.00542000 | 2.74556800  |
| C | 1.62701100  | -0.16768800 | 4.09365600  |
| O | 2.31531700  | 0.15922900  | 5.02698800  |
| O | 0.42952500  | -0.74484400 | 4.16400900  |
| C | -0.06648300 | -0.94299400 | 5.49199000  |
| H | 0.60333900  | -1.59485700 | 6.05812100  |
| H | -1.04217700 | -1.41034200 | 5.37228700  |
| H | -0.16204300 | 0.01556300  | 6.00712500  |
| C | 4.71559300  | 4.15611400  | -2.88961800 |
| C | 4.36180900  | 2.91994500  | -3.43658300 |
| C | 3.45427700  | 2.07636600  | -2.79368500 |
| C | 2.92620400  | 2.50959800  | -1.58391300 |
| C | 3.24670500  | 3.76812100  | -1.03826400 |
| C | 4.15311300  | 4.59647400  | -1.69048800 |
| H | 5.42400100  | 4.78957300  | -3.41386800 |
| H | 3.16593400  | 1.12560500  | -3.22986200 |
| H | 4.40677700  | 5.57075000  | -1.28355000 |
| C | 1.64824300  | 2.75664100  | 0.27092600  |
| C | 0.68287000  | 2.59743900  | 1.25250700  |
| C | 0.46164500  | 3.65050600  | 2.15586000  |
| C | 1.24236600  | 4.81194400  | 2.04309300  |
| C | 2.21442500  | 4.96351700  | 1.05474300  |
| C | 2.41782600  | 3.92757900  | 0.15226000  |

|   |             |             |             |
|---|-------------|-------------|-------------|
| H | 0.10808200  | 1.67569800  | 1.30612400  |
| H | 1.09041600  | 5.62816900  | 2.73941000  |
| H | 2.78909800  | 5.88249600  | 0.98794400  |
| N | 2.02426600  | 1.82973400  | -0.73435800 |
| H | 1.27138900  | 1.22820700  | -1.15399800 |
| H | 5.34520800  | 1.71889300  | 1.95398000  |
| C | -6.31602900 | -3.44077400 | -2.91995600 |
| C | -5.24605800 | -3.21253900 | -2.09039900 |
| C | -4.77013600 | -1.89264900 | -1.85795600 |
| C | -5.41625500 | -0.81817900 | -2.53106400 |
| C | -6.52944900 | -1.08352000 | -3.37194900 |
| C | -6.97524100 | -2.36610300 | -3.56218100 |
| H | -6.65651600 | -4.45755700 | -3.08975000 |
| H | -4.74476600 | -4.04933200 | -1.61637500 |
| C | -3.65269400 | -1.61397000 | -0.99869400 |
| C | -4.93570600 | 0.50527400  | -2.35585900 |
| H | -7.01287500 | -0.24648300 | -3.86837500 |
| H | -7.82297000 | -2.56293900 | -4.21073600 |
| C | -3.81398500 | 0.76859100  | -1.61142100 |
| C | -3.15098100 | -0.32351600 | -0.97277900 |
| H | -5.46380300 | 1.32456200  | -2.83668100 |
| C | -3.02853000 | -2.68606800 | -0.16716500 |
| C | -3.76152000 | -3.46766600 | 0.78845800  |
| C | -1.67601700 | -2.91251200 | -0.28091500 |
| C | -3.07642900 | -4.48760600 | 1.51203200  |
| C | -5.13458500 | -3.24216800 | 1.07792400  |
| C | -0.96789000 | -3.91610800 | 0.43628800  |
| C | -3.79228400 | -5.27435800 | 2.45367900  |
| C | -1.68575200 | -4.69691500 | 1.30713100  |
| C | -5.79531600 | -4.01089100 | 2.00382400  |
| H | -5.65921000 | -2.44228300 | 0.56715200  |
| C | -5.12326700 | -5.04800800 | 2.69285900  |
| H | -3.25697500 | -6.05566000 | 2.98648500  |
| H | -1.18683200 | -5.48403500 | 1.86739500  |
| H | -6.84257000 | -3.81736500 | 2.21407800  |
| H | -5.66082300 | -5.65151800 | 3.41729000  |
| O | -0.95382700 | -2.09754600 | -1.12399900 |
| O | -2.05063500 | -0.01101900 | -0.21042000 |
| P | -0.55866400 | -0.65487300 | -0.46831200 |
| O | 0.03425000  | -0.80262200 | 0.90007300  |
| O | 0.20851600  | 0.04601300  | -1.54597700 |
| C | 0.49187700  | -4.09401700 | 0.17862300  |
| C | 0.88999500  | -4.46436600 | -1.06792300 |
| C | 1.48727100  | -3.85495900 | 1.20911900  |



|   |             |             |             |
|---|-------------|-------------|-------------|
| C | 2.27069800  | -4.63721200 | -1.41434500 |
| H | 0.14641200  | -4.63273200 | -1.84316900 |
| C | 2.86753300  | -4.00525500 | 0.89983700  |
| C | 1.11760900  | -3.45502500 | 2.51343100  |
| C | 2.63421700  | -5.03197100 | -2.72142200 |
| C | 3.27288300  | -4.40268700 | -0.44274900 |
| C | 3.81826500  | -3.75446900 | 1.91461900  |
| H | 0.06939100  | -3.29375500 | 2.73989300  |
| C | 2.06844400  | -3.24770500 | 3.48986600  |
| C | 3.95825500  | -5.19216200 | -3.06611900 |
| H | 1.84672900  | -5.20713800 | -3.44953800 |
| C | 4.62321500  | -4.56324600 | -0.82634400 |
| C | 3.43147300  | -3.39148100 | 3.18689200  |
| H | 4.87614800  | -3.85319200 | 1.70072900  |
| H | 1.76366200  | -2.95985500 | 4.49159000  |
| C | 4.95924600  | -4.95053200 | -2.10712900 |
| H | 4.23027200  | -5.49742900 | -4.07177100 |
| H | 5.41859200  | -4.38513800 | -0.11194200 |
| H | 4.18129400  | -3.21334000 | 3.95130800  |
| H | 6.00470900  | -5.06785800 | -2.37533900 |
| C | -3.38246300 | 2.17609800  | -1.35536800 |
| C | -4.16789700 | 2.95430400  | -0.56443200 |
| C | -2.16681500 | 2.72680000  | -1.92518300 |
| C | -3.80097300 | 4.29735500  | -0.21027900 |
| H | -5.08579500 | 2.54829500  | -0.14634900 |
| C | -1.75051500 | 4.03762200  | -1.56876200 |
| C | -1.40456000 | 1.99172800  | -2.85473800 |
| C | -4.62461700 | 5.05718100  | 0.64892300  |
| C | -2.57659300 | 4.83620000  | -0.67223000 |
| C | -0.54993000 | 4.53474000  | -2.12046500 |
| H | -1.72893000 | 0.99384300  | -3.13032000 |
| C | -0.25020600 | 2.51225900  | -3.40036600 |
| C | -4.24515500 | 6.31773800  | 1.05700300  |
| H | -5.55906800 | 4.62232000  | 0.99402500  |
| C | -2.20861800 | 6.12767900  | -0.23508800 |
| C | 0.18702600  | 3.78994500  | -3.01945700 |
| H | -0.19572800 | 5.52267900  | -1.84883000 |
| H | 0.32831700  | 1.92483700  | -4.10681300 |
| C | -3.02218500 | 6.85185100  | 0.61336000  |
| H | -4.88099000 | 6.89414000  | 1.72163700  |
| H | -1.26968000 | 6.56508300  | -0.55525000 |
| H | 1.10599500  | 4.19677400  | -3.43222700 |
| H | -2.71402400 | 7.84058500  | 0.93899100  |
| C | -0.64190100 | 3.51554600  | 3.21141700  |

|   |             |            |             |
|---|-------------|------------|-------------|
| C | -2.00488300 | 3.51693400 | 2.50322800  |
| C | -0.47778800 | 2.19426000 | 3.97253400  |
| C | -0.62269000 | 4.66584700 | 4.22250700  |
| H | -2.17306600 | 4.47356000 | 2.00079200  |
| H | -2.07022100 | 2.71963400 | 1.75447500  |
| H | -2.80910300 | 3.36624100 | 3.23304100  |
| H | 0.49359200  | 2.15074700 | 4.47951900  |
| H | -1.26281300 | 2.10372800 | 4.73177200  |
| H | -0.56564200 | 1.33268500 | 3.30527000  |
| H | -1.40184600 | 4.49954100 | 4.97303600  |
| H | 0.33849400  | 4.73182900 | 4.74347700  |
| H | -0.82594800 | 5.62971500 | 3.74443100  |
| H | 4.79630700  | 2.60560600 | -4.38039100 |

**(R)-C10****TSI**Value of imaginary frequency = -307.5 cm<sup>-1</sup>

|   |             |             |             |
|---|-------------|-------------|-------------|
| H | -0.55592300 | 1.46338500  | 1.90445300  |
| C | -3.76393400 | 1.86967700  | -3.96153400 |
| C | -4.56663500 | 2.15328900  | -2.86588900 |
| C | -4.07869300 | 1.98178400  | -1.56183400 |
| C | -2.74798400 | 1.53037700  | -1.38876000 |
| C | -1.94359300 | 1.24925100  | -2.50889400 |
| C | -2.45043300 | 1.41040300  | -3.78733900 |
| H | -5.92711100 | 2.59021400  | -0.56844700 |
| H | -4.15945900 | 2.00311500  | -4.96427300 |
| H | -5.58059800 | 2.51713000  | -3.00660000 |
| C | -4.89494900 | 2.29713600  | -0.40193600 |
| C | -2.22870000 | 1.33402700  | -0.05438700 |
| H | -0.93045900 | 0.88861000  | -2.34910900 |
| H | -1.83152600 | 1.19045300  | -4.65095100 |
| C | -2.98401900 | 1.89823200  | 1.05545800  |
| C | -4.37323600 | 2.26852800  | 0.83981600  |
| H | -1.14810500 | 1.28678300  | 0.04076300  |
| N | -2.51369600 | 2.09914100  | 2.26242300  |
| N | -1.26699400 | 1.83624200  | 2.56353200  |
| C | -0.90488800 | 1.93959300  | 3.90863800  |
| O | -1.58813400 | 2.40857400  | 4.78312700  |
| O | 0.30719200  | 1.40955100  | 4.05400800  |
| C | 0.83227200  | 1.47234000  | 5.38266200  |
| H | 0.85019900  | 2.50532100  | 5.73752400  |
| H | 1.84275500  | 1.07247100  | 5.31859200  |
| H | 0.22394500  | 0.86659600  | 6.05832900  |
| C | -6.32622400 | -1.81542500 | -0.53801300 |
| C | -5.51592200 | -1.59101200 | -1.66611600 |
| C | -4.18689500 | -1.18886900 | -1.47469500 |
| C | -3.71563500 | -1.06969100 | -0.17363600 |
| C | -4.50644200 | -1.36220100 | 0.94607300  |
| C | -5.83763300 | -1.71844400 | 0.76149800  |
| H | -7.36298400 | -2.10625200 | -0.68097800 |
| H | -3.52180200 | -1.00700500 | -2.31189700 |
| H | -6.47545400 | -1.94852500 | 1.60960100  |
| C | -2.33796400 | -1.04392400 | 1.63584800  |
| C | -1.21404300 | -1.14164400 | 2.44752500  |
| C | -1.41556900 | -1.50274400 | 3.77801500  |
| C | -2.69922400 | -1.75908400 | 4.27667900  |
| C | -3.81367900 | -1.69365300 | 3.44582300  |
| C | -3.62376600 | -1.34950100 | 2.10853500  |

|   |             |             |             |
|---|-------------|-------------|-------------|
| H | -0.21884500 | -0.91832700 | 2.07941400  |
| H | -0.55462000 | -1.58910900 | 4.43398400  |
| H | -2.82311700 | -2.03141700 | 5.32014100  |
| H | -4.80480100 | -1.92911500 | 3.82130900  |
| N | -2.40830600 | -0.69267000 | 0.25034800  |
| H | -1.57121300 | -0.93116200 | -0.33045400 |
| C | -6.10573600 | -1.80652400 | -3.06395300 |
| C | -5.05043800 | -1.65258800 | -4.16226700 |
| C | -7.22082700 | -0.77542200 | -3.30143700 |
| C | -6.69211300 | -3.22484700 | -3.16382200 |
| H | -4.23417700 | -2.37248900 | -4.03781200 |
| H | -4.62318400 | -0.64546500 | -4.17382700 |
| H | -5.51218500 | -1.83274900 | -5.13808300 |
| H | -8.02312600 | -0.87702500 | -2.56407900 |
| H | -7.65598600 | -0.91253000 | -4.29731800 |
| H | -6.82400400 | 0.24326000  | -3.23593200 |
| H | -7.10695200 | -3.38522800 | -4.16475900 |
| H | -7.49526500 | -3.38890700 | -2.44023100 |
| H | -5.91747700 | -3.97948400 | -2.99059100 |
| H | -4.95023900 | 2.54685700  | 1.71577800  |
| C | 7.00875100  | -1.66142300 | -3.57709000 |
| C | 5.68199700  | -0.90002900 | -3.36485500 |
| C | 4.75718800  | -1.57662900 | -2.38226700 |
| C | 4.54216700  | -2.94929100 | -2.60051600 |
| C | 5.36661100  | -3.60857200 | -3.67658800 |
| C | 6.83660900  | -3.19460500 | -3.52278700 |
| H | 7.41776100  | -1.35919200 | -4.54582900 |
| H | 5.86599000  | 0.14224300  | -3.09704600 |
| C | 4.04070200  | -0.90446900 | -1.37795800 |
| C | 3.60597500  | -3.65124800 | -1.84384300 |
| H | 5.25899400  | -4.69584000 | -3.62351100 |
| H | 7.44504100  | -3.67433100 | -4.29498000 |
| C | 2.83807000  | -2.99836100 | -0.88123100 |
| C | 3.07390600  | -1.63908300 | -0.67225600 |
| H | 3.44782200  | -4.71164400 | -2.02551600 |
| C | 4.19742200  | 0.54744100  | -1.04024600 |
| C | 5.40799400  | 1.11222300  | -0.58474900 |
| C | 3.04554000  | 1.34335200  | -1.05142800 |
| C | 5.43359200  | 2.46840500  | -0.21580400 |
| C | 6.64934100  | 0.25549900  | -0.42898700 |
| C | 3.03498800  | 2.67484700  | -0.62602900 |
| C | 6.69140000  | 3.14233600  | 0.30292900  |
| C | 4.25714200  | 3.22149000  | -0.24360700 |
| C | 7.66614000  | 0.86046900  | 0.53635600  |

|   |             |             |             |
|---|-------------|-------------|-------------|
| H | 6.35712400  | -0.75113100 | -0.11162000 |
| C | 7.95336800  | 2.30235200  | 0.13015600  |
| H | 6.80311200  | 4.11606200  | -0.18654800 |
| H | 4.29043200  | 4.25965700  | 0.08171900  |
| H | 7.27019500  | 0.84069100  | 1.55989100  |
| H | 8.27549900  | 2.32000600  | -0.91901000 |
| O | 1.85771300  | 0.75855900  | -1.45053600 |
| O | 2.29877800  | -0.99650900 | 0.27479900  |
| P | 1.06872400  | -0.06905400 | -0.27936500 |
| O | 0.70032500  | 0.81420300  | 0.87214600  |
| O | 0.00551700  | -0.84722700 | -0.99620200 |
| C | 1.74480500  | 3.42027400  | -0.54011700 |
| C | 1.01200000  | 3.63399700  | -1.66516600 |
| C | 1.23007400  | 3.86881800  | 0.74519800  |
| C | -0.28118200 | 4.25557100  | -1.63340300 |
| H | 1.39149400  | 3.29842900  | -2.62733600 |
| C | -0.04268100 | 4.49832300  | 0.81419100  |
| C | 1.95443100  | 3.67251700  | 1.94276000  |
| C | -1.01771100 | 4.43376900  | -2.82568600 |
| C | -0.84061800 | 4.65244200  | -0.39589400 |
| C | -0.50474400 | 4.96027000  | 2.06749100  |
| H | 2.89927700  | 3.14229600  | 1.90785600  |
| C | 1.47788700  | 4.13025100  | 3.15217300  |
| C | -2.29015900 | 4.96033600  | -2.79750100 |
| H | -0.56628900 | 4.12668000  | -3.76579200 |
| C | -2.15768800 | 5.16570900  | -0.39093900 |
| C | 0.24234900  | 4.79577600  | 3.21444800  |
| H | -1.46368900 | 5.46093500  | 2.13838000  |
| H | 2.05770300  | 3.97009100  | 4.05651400  |
| C | -2.86816100 | 5.31377500  | -1.56449400 |
| H | -2.85265400 | 5.08288400  | -3.71800600 |
| H | -2.63354100 | 5.43979700  | 0.54416700  |
| H | -0.13483800 | 5.16256900  | 4.16412300  |
| H | -3.88245900 | 5.70025900  | -1.53294800 |
| C | 1.72115700  | -3.62807800 | -0.11609100 |
| C | 0.50297400  | -3.73927900 | -0.70303300 |
| C | 1.87820900  | -3.95984800 | 1.28654400  |
| C | -0.67000600 | -4.10186000 | 0.04147000  |
| H | 0.37594100  | -3.44965200 | -1.74186200 |
| C | 0.74829100  | -4.35192800 | 2.05098800  |
| C | 3.14280200  | -3.88672800 | 1.91149800  |
| C | -1.93866300 | -4.08295400 | -0.57992000 |
| C | -0.56586300 | -4.39770400 | 1.42144200  |
| C | 0.93522100  | -4.65867000 | 3.41681600  |

|   |             |             |             |
|---|-------------|-------------|-------------|
| H | 4.00279600  | -3.58607200 | 1.32066100  |
| C | 3.29666200  | -4.19445200 | 3.24624900  |
| C | -3.08204100 | -4.35205600 | 0.14099000  |
| H | -1.99688400 | -3.83272300 | -1.63679000 |
| C | -1.75160500 | -4.68064000 | 2.13510900  |
| C | 2.18065100  | -4.58405200 | 4.00546200  |
| H | 0.08804500  | -4.96115500 | 4.02238600  |
| H | 4.27672700  | -4.13404900 | 3.70914900  |
| C | -2.98230400 | -4.65604900 | 1.51098100  |
| H | -4.05625900 | -4.30964500 | -0.33907600 |
| H | -1.70976600 | -4.90019700 | 3.19620100  |
| H | 2.29667700  | -4.82668500 | 5.05721800  |
| H | -3.88119100 | -4.85974100 | 2.08549300  |
| H | 7.73743000  | -1.35296300 | -2.82153100 |
| H | 7.19134700  | -3.57285700 | -2.55825300 |
| H | 5.00495100  | -3.29653200 | -4.66660400 |
| H | 5.14956600  | -0.87695900 | -4.32559000 |
| H | 7.13728900  | 0.13982000  | -1.40418800 |
| H | 8.57962300  | 0.25815000  | 0.52846100  |
| H | 8.76609200  | 2.73008900  | 0.72501900  |
| H | 6.54682000  | 3.35311700  | 1.37093900  |

**(R)-C10****TSII**Value of imaginary frequency = -270.5 cm<sup>-1</sup>

|   |            |             |             |
|---|------------|-------------|-------------|
| H | 1.41017600 | -1.15751600 | 1.63493600  |
| C | 2.46345700 | -2.71592200 | -4.78232600 |
| C | 3.61659700 | -2.75598500 | -4.01401300 |
| C | 3.59764800 | -2.32016400 | -2.67995200 |
| C | 2.37742600 | -1.84473100 | -2.14033400 |
| C | 1.21173100 | -1.80962300 | -2.93137800 |
| C | 1.25503100 | -2.24520700 | -4.24312300 |
| H | 5.71861300 | -2.68181100 | -2.30303100 |
| H | 2.49493700 | -3.05320800 | -5.81400300 |
| H | 4.54783700 | -3.12190600 | -4.43707800 |
| C | 4.78682400 | -2.36075200 | -1.84717500 |
| C | 2.35965100 | -1.33253100 | -0.79937300 |
| H | 0.29346300 | -1.42113800 | -2.49691200 |
| H | 0.35947400 | -2.22331200 | -4.85529500 |
| C | 3.46693900 | -1.66407600 | 0.07444200  |
| C | 4.72635500 | -2.06224800 | -0.53360200 |
| H | 1.38852000 | -1.16175300 | -0.34771800 |
| N | 3.41435800 | -1.70669800 | 1.38429300  |
| N | 2.31289400 | -1.46310700 | 2.04944400  |
| C | 2.36733500 | -1.63835000 | 3.43920800  |
| O | 3.35148800 | -1.94421600 | 4.06362000  |
| O | 1.16125700 | -1.39543400 | 3.93871900  |
| C | 1.07205400 | -1.46710100 | 5.36386600  |
| H | 1.33624000 | -2.46719300 | 5.71308500  |
| H | 0.03503400 | -1.23892300 | 5.60454500  |
| H | 1.73999700 | -0.73420100 | 5.82215800  |
| C | 5.77668400 | 1.35845800  | -3.79151300 |
| C | 4.59003200 | 0.84765000  | -4.32101500 |
| C | 3.47182400 | 0.62706900  | -3.51365700 |
| C | 3.58994400 | 0.92535800  | -2.16329300 |
| C | 4.76452200 | 1.48678000  | -1.62587300 |
| C | 5.87056500 | 1.69624400  | -2.44047400 |
| H | 6.62948900 | 1.51575400  | -4.44418000 |
| H | 2.54679200 | 0.24457900  | -3.93110700 |
| H | 6.78204700 | 2.12692200  | -2.03750000 |
| C | 3.15268500 | 1.40158200  | 0.01265800  |
| C | 2.49331600 | 1.68152000  | 1.19707400  |
| C | 3.17549900 | 2.41185200  | 2.18345200  |
| C | 4.51159900 | 2.77695900  | 1.95634700  |
| C | 5.16993900 | 2.48233100  | 0.76316100  |
| C | 4.47521300 | 1.80664000  | -0.23138700 |

|   |             |             |             |
|---|-------------|-------------|-------------|
| H | 1.46651500  | 1.35364800  | 1.34015600  |
| H | 5.05378700  | 3.32578800  | 2.71747400  |
| H | 6.19417100  | 2.80677500  | 0.60588900  |
| N | 2.63331800  | 0.73458000  | -1.13216900 |
| H | 1.61137900  | 0.85732500  | -1.32027100 |
| H | 5.58814600  | -2.15047000 | 0.11987400  |
| C | -6.59960700 | -0.04556700 | -3.57756000 |
| C | -5.96880300 | -0.36747800 | -2.22480500 |
| C | -4.99674800 | 0.70029100  | -1.75762600 |
| C | -5.00602200 | 1.97621400  | -2.34206900 |
| C | -6.00780600 | 2.36681500  | -3.41325800 |
| C | -7.15651000 | 1.37385300  | -3.55836300 |
| H | -5.84680500 | -0.12992900 | -4.37194000 |
| H | -6.77409200 | -0.47943800 | -1.48961700 |
| C | -4.03255200 | 0.40027400  | -0.76948500 |
| C | -4.03735300 | 2.91510700  | -1.97394100 |
| H | -6.38629200 | 3.37193800  | -3.19693000 |
| H | -7.72207400 | 1.59235700  | -4.46923800 |
| C | -3.03245300 | 2.61747200  | -1.06104600 |
| C | -3.05210700 | 1.35105500  | -0.47279700 |
| H | -4.04895000 | 3.89802100  | -2.44058000 |
| C | -3.96549600 | -0.92964900 | -0.08811800 |
| C | -5.01972900 | -1.46796000 | 0.66572400  |
| C | -2.76562400 | -1.65715100 | -0.16852900 |
| C | -4.88753100 | -2.75024500 | 1.22845000  |
| C | -6.26966300 | -0.70951500 | 1.04666300  |
| C | -2.60060800 | -2.91384700 | 0.41914500  |
| C | -6.07678700 | -3.30621900 | 1.96929500  |
| C | -3.70257500 | -3.46163400 | 1.08340600  |
| C | -7.57112100 | -1.53739300 | 0.92918100  |
| H | -6.14117800 | -0.43743000 | 2.10305800  |
| C | -7.34660300 | -3.04463700 | 1.14992600  |
| H | -5.93904500 | -4.37540000 | 2.15486400  |
| H | -3.61525000 | -4.45259300 | 1.52327700  |
| H | -8.27954100 | -1.15216000 | 1.66884100  |
| H | -7.23090800 | -3.54719700 | 0.18325300  |
| O | -1.71543900 | -1.09833200 | -0.87054700 |
| O | -2.05502600 | 1.02701000  | 0.43165200  |
| P | -0.84340600 | 0.08102400  | -0.13119100 |
| O | -0.12512000 | -0.44103900 | 1.07653000  |
| O | -0.07349800 | 0.72829900  | -1.24362400 |
| C | -1.28630100 | -3.61449400 | 0.34769700  |
| C | -0.77314700 | -3.97514500 | -0.85957900 |
| C | -0.53743500 | -3.91019400 | 1.55959300  |



|   |             |             |             |
|---|-------------|-------------|-------------|
| C | 0.51992700  | -4.58292200 | -0.99415000 |
| H | -1.34183900 | -3.78209200 | -1.76643500 |
| C | 0.76609300  | -4.46741500 | 1.45966500  |
| C | -1.07879200 | -3.67335400 | 2.84519300  |
| C | 1.00001900  | -4.97940500 | -2.26264500 |
| C | 1.33487700  | -4.75210600 | 0.14877900  |
| C | 1.46345700  | -4.78035700 | 2.64865600  |
| H | -2.05628100 | -3.21382800 | 2.93245200  |
| C | -0.39282400 | -4.02599100 | 3.98586000  |
| C | 2.27700600  | -5.47266400 | -2.41018900 |
| H | 0.34487000  | -4.87127400 | -3.12274800 |
| C | 2.65745900  | -5.21785900 | -0.03497300 |
| C | 0.89264700  | -4.58374700 | 3.88772100  |
| H | 2.45580500  | -5.21356100 | 2.59220700  |
| H | -0.83968900 | -3.85565600 | 4.96087400  |
| C | 3.12049300  | -5.56495500 | -1.28690400 |
| H | 2.63984900  | -5.77018700 | -3.38914900 |
| H | 3.32911500  | -5.29808800 | 0.81285400  |
| H | 1.44147400  | -4.85722400 | 4.78406300  |
| H | 4.14134900  | -5.91581100 | -1.40397000 |
| C | -1.92803500 | 3.57160000  | -0.74946900 |
| C | -0.85163000 | 3.62809600  | -1.57435500 |
| C | -1.97369400 | 4.40052200  | 0.43776300  |
| C | 0.27873400  | 4.46589000  | -1.29209100 |
| H | -0.80470700 | 2.97952800  | -2.44363600 |
| C | -0.89278800 | 5.27353600  | 0.73017100  |
| C | -3.07869200 | 4.34990800  | 1.31705000  |
| C | 1.41025300  | 4.44087200  | -2.13730500 |
| C | 0.27075700  | 5.29822000  | -0.14725200 |
| C | -0.97279800 | 6.07393900  | 1.89154700  |
| H | -3.89945500 | 3.67637700  | 1.08993300  |
| C | -3.12615000 | 5.13774900  | 2.44673900  |
| C | 2.51531400  | 5.21524200  | -1.85993000 |
| H | 1.39630700  | 3.78657300  | -3.00540100 |
| C | 1.41079800  | 6.09422300  | 0.10497400  |
| C | -2.06313200 | 6.01026100  | 2.73400900  |
| H | -0.16314600 | 6.75190100  | 2.13805600  |
| H | -3.98228400 | 5.08502600  | 3.11194400  |
| C | 2.50876600  | 6.05298000  | -0.72988300 |
| H | 3.38677100  | 5.17972700  | -2.50635600 |
| H | 1.43961500  | 6.74597300  | 0.97133800  |
| H | -2.09613400 | 6.63475300  | 3.62132100  |
| H | 3.37612100  | 6.66627900  | -0.50622000 |
| H | -7.38470900 | -0.77613700 | -3.79509100 |

|   |             |             |             |
|---|-------------|-------------|-------------|
| H | -7.84983100 | 1.47588000  | -2.71326400 |
| H | -5.47629300 | 2.44063000  | -4.37152700 |
| H | -5.45220500 | -1.33252000 | -2.25746300 |
| H | -6.35295400 | 0.23279100  | 0.50219200  |
| H | -8.03105200 | -1.38036300 | -0.05098600 |
| H | -8.21723900 | -3.49035800 | 1.63976100  |
| H | -6.17181800 | -2.81726400 | 2.94940200  |
| H | 4.52924800  | 0.61594600  | -5.37969500 |
| C | 2.42397700  | 2.81389300  | 3.45574800  |
| C | 1.24193900  | 3.71943200  | 3.07097900  |
| C | 1.88751200  | 1.55214000  | 4.14270200  |
| C | 3.31514500  | 3.56820700  | 4.44617000  |
| H | 1.59670300  | 4.63113500  | 2.57764500  |
| H | 0.55097200  | 3.21379400  | 2.38819700  |
| H | 0.68100200  | 4.00774800  | 3.96721500  |
| H | 2.71253400  | 0.87733500  | 4.40195400  |
| H | 1.36017500  | 1.81878300  | 5.06581800  |
| H | 1.18582800  | 1.01224400  | 3.50091800  |
| H | 2.73151300  | 3.82050900  | 5.33705200  |
| H | 4.16913300  | 2.96173300  | 4.76607000  |
| H | 3.69501500  | 4.50321000  | 4.02153600  |

(S)-C6-50°C

TSI

Value of imaginary frequency = -325.8 cm<sup>-1</sup>

|   |             |             |             |
|---|-------------|-------------|-------------|
| C | 4.76696100  | 0.81221700  | -1.30553000 |
| C | 5.92095400  | 1.38840300  | -0.76666100 |
| C | 5.86235300  | 2.61510300  | -0.11739600 |
| C | 4.62853500  | 3.24653800  | 0.02354300  |
| C | 3.44497200  | 2.66160300  | -0.44495000 |
| C | 3.53901100  | 1.43518700  | -1.12235200 |
| C | 6.42641400  | -0.86562400 | -1.30914100 |
| C | 7.10588000  | 0.47379600  | -0.97189300 |
| H | 6.75950900  | 3.07045800  | 0.29187800  |
| H | 4.56693000  | 4.20434600  | 0.53268500  |
| H | 6.15527600  | -1.38287600 | -0.38218800 |
| H | 7.72955700  | 0.82325300  | -1.80406700 |
| C | 5.11955400  | -0.46306200 | -2.05190800 |
| C | 4.16238400  | -1.63713300 | -2.17562400 |
| C | 5.43162100  | -0.19800200 | -3.55216100 |
| C | 4.41830300  | -2.33838700 | -3.36016200 |
| C | 3.16394100  | -2.08642700 | -1.32216200 |
| C | 5.43694000  | -1.59671900 | -4.19513800 |
| H | 6.36855800  | 0.34978300  | -3.68852900 |
| C | 3.74185700  | -3.51574400 | -3.64941000 |
| C | 2.47534100  | -3.28178900 | -1.58295300 |
| H | 5.17260100  | -1.57941800 | -5.25600200 |
| C | 2.78873200  | -3.98884700 | -2.74723300 |
| H | 3.93994400  | -4.05684300 | -4.57022400 |
| H | 2.25299200  | -4.91082400 | -2.95412900 |
| H | 7.74630800  | 0.41662100  | -0.08752000 |
| H | 7.05097800  | -1.53598000 | -1.90664300 |
| H | 4.61837900  | 0.39945200  | -3.97831300 |
| H | 6.42475100  | -2.06674100 | -4.11294600 |
| O | 2.80406500  | -1.32225800 | -0.22604900 |
| O | 2.39927200  | 0.79794700  | -1.57827500 |
| P | 1.65118700  | -0.18284500 | -0.49322900 |
| O | 1.47113400  | 0.51974800  | 0.81663300  |
| O | 0.47328500  | -0.74762000 | -1.22821000 |
| H | 0.26932300  | 1.20244700  | 1.96113500  |
| C | 1.38437200  | -3.74155800 | -0.67807700 |
| C | 0.10923400  | -3.76615800 | -1.14454900 |
| C | 1.65508400  | -4.13927200 | 0.69112700  |
| C | -1.00405000 | -4.11014600 | -0.30866900 |
| H | -0.09419100 | -3.44516500 | -2.16261100 |
| C | 0.58367300  | -4.52690000 | 1.53876100  |

|   |             |             |             |
|---|-------------|-------------|-------------|
| C | 2.97427000  | -4.15958700 | 1.19729800  |
| C | -2.32187900 | -4.01841600 | -0.80832800 |
| C | -0.78513600 | -4.48337900 | 1.03934500  |
| C | 0.88299300  | -4.92313800 | 2.86113400  |
| H | 3.79188700  | -3.86817600 | 0.54562700  |
| C | 3.23600900  | -4.54727300 | 2.49258300  |
| C | -3.40436800 | -4.27615400 | 0.00337400  |
| H | -2.46796700 | -3.71883900 | -1.84365300 |
| C | -1.91164600 | -4.74956300 | 1.84783300  |
| C | 2.17872900  | -4.93412800 | 3.33251300  |
| H | 0.08348400  | -5.23109800 | 3.52564000  |
| H | 4.25679000  | -4.55631100 | 2.86152000  |
| C | -3.19233600 | -4.64318700 | 1.34361200  |
| H | -4.41499300 | -4.17512600 | -0.38165100 |
| H | -1.78452600 | -5.01369300 | 2.89162900  |
| H | 2.38027100  | -5.24490300 | 4.35306600  |
| H | -4.04220300 | -4.83272100 | 1.99281400  |
| C | 2.13017500  | 3.33813200  | -0.25172800 |
| C | 1.37961800  | 3.65824600  | -1.34017300 |
| C | 1.65691900  | 3.70686600  | 1.07379300  |
| C | 0.12910600  | 4.35227000  | -1.23537900 |
| H | 1.73365900  | 3.39351400  | -2.33369900 |
| C | 0.42599700  | 4.40337000  | 1.21584900  |
| C | 2.39063800  | 3.38041600  | 2.23750800  |
| C | -0.60304600 | 4.67998200  | -2.39817900 |
| C | -0.37659600 | 4.70480900  | 0.03760700  |
| C | 0.01386400  | 4.79338200  | 2.51003900  |
| H | 3.29225900  | 2.78623100  | 2.14289400  |
| C | 1.97401700  | 3.79259700  | 3.48511100  |
| C | -1.82098900 | 5.31468000  | -2.30891600 |
| H | -0.19020500 | 4.40626500  | -3.36564600 |
| C | -1.63689900 | 5.34228200  | 0.10236100  |
| C | 0.77829100  | 4.51552300  | 3.62269600  |
| H | -0.91929400 | 5.32873800  | 2.64114600  |
| H | 2.56319200  | 3.53992100  | 4.36183900  |
| C | -2.34491000 | 5.63676800  | -1.04353700 |
| H | -2.38084200 | 5.55620300  | -3.20711900 |
| H | -2.07003000 | 5.60073400  | 1.06207500  |
| H | 0.44110200  | 4.83261900  | 4.60439300  |
| H | -3.31474700 | 6.11915000  | -0.96572500 |
| C | -3.26318100 | 2.36799100  | -3.64401200 |
| C | -3.95866600 | 2.62708200  | -2.47283700 |
| C | -3.39759800 | 2.31546600  | -1.22507600 |
| C | -2.10204500 | 1.74827200  | -1.18486700 |

|   |             |             |             |
|---|-------------|-------------|-------------|
| C | -1.40457100 | 1.49464900  | -2.38013100 |
| C | -1.98427400 | 1.79588300  | -3.60121900 |
| H | -5.12651800 | 2.96886900  | -0.06008700 |
| H | -3.71513900 | 2.60930600  | -4.60195400 |
| H | -4.94619400 | 3.07913000  | -2.50890100 |
| C | -4.11271600 | 2.58631200  | 0.01022000  |
| C | -1.51969900 | 1.38695500  | 0.09366900  |
| H | -0.41726500 | 1.04389200  | -2.32332400 |
| H | -1.44631300 | 1.59552000  | -4.52207700 |
| C | -2.15729200 | 1.90995600  | 1.29683700  |
| C | -3.52146100 | 2.40439100  | 1.20584200  |
| H | -0.44184500 | 1.25157700  | 0.11227100  |
| N | -1.61119900 | 1.94718700  | 2.48674300  |
| N | -0.37825300 | 1.55594500  | 2.69084000  |
| C | 0.03460500  | 1.44773200  | 4.02025400  |
| O | -0.59392900 | 1.81032100  | 4.98212700  |
| O | 1.22643800  | 0.85235900  | 4.04066100  |
| C | 1.76977100  | 0.65486300  | 5.34692200  |
| H | 1.11255600  | 0.01458700  | 5.94009700  |
| H | 2.73485600  | 0.17467500  | 5.19472200  |
| H | 1.89557100  | 1.61260300  | 5.85752600  |
| C | -5.91927000 | -1.27432300 | -0.29293100 |
| C | -5.18079600 | -1.05306500 | -1.46929900 |
| C | -3.80667400 | -0.79722300 | -1.36510600 |
| C | -3.22730200 | -0.82120200 | -0.10428100 |
| C | -3.95396600 | -1.10503200 | 1.05857000  |
| C | -5.32473700 | -1.31285100 | 0.96472800  |
| H | -6.98782000 | -1.45503200 | -0.36586500 |
| H | -3.19373800 | -0.61619000 | -2.24171200 |
| H | -5.91581800 | -1.53650600 | 1.84769900  |
| C | -1.71559000 | -1.08262100 | 1.57845900  |
| C | -0.55093500 | -1.36930400 | 2.27838100  |
| C | -0.69045100 | -1.79714500 | 3.59720900  |
| C | -1.95138200 | -1.92673100 | 4.19260800  |
| C | -3.11221400 | -1.67582600 | 3.46768000  |
| C | -2.98764200 | -1.26917300 | 2.14077500  |
| H | 0.43194200  | -1.24431700 | 1.83714300  |
| H | 0.20327400  | -2.03933100 | 4.16420700  |
| H | -2.02349700 | -2.25031900 | 5.22633400  |
| H | -4.09138100 | -1.81642300 | 3.91486900  |
| N | -1.85532800 | -0.61102500 | 0.23178100  |
| H | -1.09722900 | -0.87423900 | -0.43510000 |
| C | -5.89774300 | -1.11376100 | -2.82200900 |
| C | -4.92383600 | -0.97662500 | -3.99478900 |

|   |             |             |             |
|---|-------------|-------------|-------------|
| C | -6.62254900 | -2.46311500 | -2.96005900 |
| C | -6.92447000 | 0.02741200  | -2.89733900 |
| H | -4.40502300 | -0.01351100 | -3.97800600 |
| H | -4.17167400 | -1.77317400 | -3.98733500 |
| H | -5.47564600 | -1.04491900 | -4.93749900 |
| H | -7.38097200 | -2.60422300 | -2.18489300 |
| H | -7.12543200 | -2.51854900 | -3.93158900 |
| H | -5.91193300 | -3.29427000 | -2.89740900 |
| H | -7.44969100 | 0.00205200  | -3.85843900 |
| H | -7.67173100 | -0.05196300 | -2.10179600 |
| H | -6.42777000 | 0.99857600  | -2.80141700 |
| H | -4.01997100 | 2.64184500  | 2.14019100  |

(S)-C6-50°C

TSH

Value of imaginary frequency = -279.8 cm<sup>-1</sup>

|   |             |             |             |
|---|-------------|-------------|-------------|
| C | -0.03554300 | 4.60433200  | -0.04284400 |
| C | -0.20483100 | 5.51785700  | 1.00157000  |
| C | -1.35922800 | 5.49891100  | 1.77441100  |
| C | -2.34404000 | 4.55044300  | 1.49900400  |
| C | -2.17258000 | 3.58710300  | 0.49778800  |
| C | -0.98829600 | 3.62094300  | -0.25405600 |
| C | 2.05644200  | 5.64381100  | 0.27357500  |
| C | 1.01459200  | 6.40398100  | 1.11733900  |
| H | -1.49712700 | 6.21059800  | 2.58323800  |
| H | -3.25985600 | 4.53661500  | 2.08338300  |
| H | 2.54385000  | 4.88045500  | 0.88986800  |
| H | 0.81427000  | 7.39883000  | 0.70075000  |
| C | 1.21871200  | 4.93260400  | -0.82798000 |
| C | 2.03200400  | 3.89305200  | -1.58413000 |
| C | 0.91036200  | 5.93660100  | -1.97645000 |
| C | 2.66185900  | 4.49755600  | -2.67713600 |
| C | 2.26803200  | 2.54542700  | -1.31657800 |
| C | 2.17292100  | 5.91576600  | -2.85341300 |
| H | 0.65583500  | 6.93086900  | -1.59867500 |
| C | 3.58989600  | 3.80282800  | -3.44208400 |
| C | 3.21731200  | 1.83007600  | -2.06082700 |
| H | 1.96895000  | 6.15805000  | -3.90003400 |
| C | 3.87837400  | 2.48323400  | -3.10851600 |
| H | 4.07956700  | 4.27708100  | -4.28767500 |
| H | 4.61333800  | 1.92476800  | -3.68165400 |
| H | 1.33058300  | 6.54559600  | 2.15460200  |
| H | 2.83165200  | 6.29005200  | -0.14848200 |
| H | 0.05659300  | 5.55883700  | -2.54970200 |
| H | 2.92091000  | 6.63251100  | -2.49310700 |
| O | 1.58311200  | 1.92579400  | -0.28883500 |
| O | -0.71788700 | 2.62061300  | -1.17253200 |
| P | 0.07250900  | 1.32818400  | -0.54119200 |
| O | -0.43517000 | 1.03055000  | 0.83847500  |
| O | 0.04123000  | 0.27274000  | -1.60549400 |
| H | -0.88198900 | -0.14611200 | 2.04548600  |
| C | 3.55954800  | 0.40164500  | -1.78408900 |
| C | 2.81451200  | -0.59219400 | -2.33033400 |
| C | 4.76659400  | 0.07382800  | -1.04546800 |
| C | 3.15445300  | -1.97626800 | -2.16471400 |
| H | 1.92396500  | -0.34272100 | -2.89696600 |
| C | 5.16603200  | -1.28317700 | -0.90927200 |

|   |             |             |             |
|---|-------------|-------------|-------------|
| C | 5.57386400  | 1.08751700  | -0.48090400 |
| C | 2.33439500  | -2.97621600 | -2.72733400 |
| C | 4.31345100  | -2.33982900 | -1.43838300 |
| C | 6.39403200  | -1.56132200 | -0.26937700 |
| H | 5.25240600  | 2.12090200  | -0.56588700 |
| C | 6.75673300  | 0.78380100  | 0.15917700  |
| C | 2.62659400  | -4.31113700 | -2.55297600 |
| H | 1.45815900  | -2.67201600 | -3.29489200 |
| C | 4.58481500  | -3.71415900 | -1.26321400 |
| C | 7.17918900  | -0.55259000 | 0.24881700  |
| H | 6.73556600  | -2.58657700 | -0.18148100 |
| H | 7.36384900  | 1.57704300  | 0.58409700  |
| C | 3.75683200  | -4.67883200 | -1.80210400 |
| H | 1.97423500  | -5.07216800 | -2.97196800 |
| H | 5.44639600  | -4.02867200 | -0.68478600 |
| H | 8.11898700  | -0.79422300 | 0.73553100  |
| H | 3.98154100  | -5.72919700 | -1.64291600 |
| C | -3.23772000 | 2.59253300  | 0.18252600  |
| C | -3.78557800 | 2.60513100  | -1.06275200 |
| C | -3.73102400 | 1.64715900  | 1.16976900  |
| C | -4.86147200 | 1.73608000  | -1.44057600 |
| H | -3.41570400 | 3.30964500  | -1.80376900 |
| C | -4.78734900 | 0.75864900  | 0.82792200  |
| C | -3.16720700 | 1.57699600  | 2.46384000  |
| C | -5.41514300 | 1.80956700  | -2.73726900 |
| C | -5.37638700 | 0.80766000  | -0.50449800 |
| C | -5.23331200 | -0.16347600 | 1.80040800  |
| H | -2.32628300 | 2.21762000  | 2.70625400  |
| C | -3.64663400 | 0.68668500  | 3.40127300  |
| C | -6.45192200 | 0.98202200  | -3.10910400 |
| H | -5.00605900 | 2.53396000  | -3.43664000 |
| C | -6.43535600 | -0.03225200 | -0.91274900 |
| C | -4.68371800 | -0.19706200 | 3.06448500  |
| H | -6.02497600 | -0.86322200 | 1.55854700  |
| H | -3.21027300 | 0.65282500  | 4.39612600  |
| C | -6.96197800 | 0.05193300  | -2.18565600 |
| H | -6.87444400 | 1.04704500  | -4.10703700 |
| H | -6.84987600 | -0.76149300 | -0.22596700 |
| H | -5.04867400 | -0.91253500 | 3.79467200  |
| H | -7.77712500 | -0.60462300 | -2.47430400 |
| C | -4.58193200 | -2.50560600 | -2.93872900 |
| C | -4.50956600 | -3.36834300 | -1.85568700 |
| C | -3.64735700 | -3.09263100 | -0.78402400 |
| C | -2.86964000 | -1.90966500 | -0.82857700 |



|   |             |             |             |
|---|-------------|-------------|-------------|
| C | -2.95608800 | -1.03878000 | -1.93267700 |
| C | -3.80334200 | -1.33881300 | -2.98359200 |
| H | -4.10456500 | -4.90876000 | 0.34198200  |
| H | -5.25130100 | -2.73438900 | -3.76282200 |
| H | -5.11290900 | -4.27115900 | -1.83144800 |
| C | -3.53889700 | -3.98221900 | 0.35961000  |
| C | -1.94224400 | -1.62970100 | 0.23414200  |
| H | -2.33044300 | -0.14900400 | -1.94984200 |
| H | -3.87427200 | -0.66920300 | -3.83361200 |
| C | -2.06250500 | -2.39227400 | 1.46357800  |
| C | -2.78812800 | -3.65194500 | 1.42886200  |
| H | -1.54774400 | -0.61839100 | 0.28347300  |
| N | -1.61584900 | -2.01071800 | 2.63644000  |
| N | -1.04372700 | -0.84477200 | 2.79865300  |
| C | -0.74679400 | -0.45319100 | 4.10378500  |
| O | -0.83442800 | -1.14409700 | 5.08719100  |
| O | -0.36205400 | 0.82362800  | 4.07225200  |
| C | 0.05069100  | 1.37043200  | 5.32863700  |
| H | 0.92171800  | 0.83243700  | 5.70993300  |
| H | 0.30664400  | 2.40805800  | 5.12214500  |
| H | -0.76228800 | 1.31329200  | 6.05576900  |
| C | -0.67685900 | -6.28243800 | -1.73922800 |
| C | -1.24768600 | -5.29356500 | -2.54348200 |
| C | -1.10342200 | -3.93806800 | -2.23728000 |
| C | -0.37806700 | -3.61804200 | -1.09928100 |
| C | 0.24234900  | -4.60000600 | -0.30536200 |
| C | 0.08511400  | -5.94421500 | -0.61946700 |
| H | -0.81057700 | -7.32726600 | -2.00093400 |
| H | -1.53570300 | -3.16994900 | -2.87082800 |
| H | 0.56041800  | -6.71328800 | -0.01820300 |
| C | 0.83772000  | -2.52444500 | 0.48159500  |
| C | 1.50223000  | -1.54837200 | 1.21463700  |
| C | 2.39821800  | -1.95352300 | 2.20456300  |
| C | 2.60142800  | -3.33300400 | 2.41514800  |
| C | 1.93684600  | -4.30244800 | 1.67691100  |
| C | 1.03585200  | -3.89292400 | 0.69475500  |
| H | 1.30473700  | -0.49859000 | 1.03863500  |
| H | 3.30459300  | -3.65375800 | 3.17836600  |
| H | 2.12242800  | -5.35717900 | 1.85553300  |
| N | -0.13125500 | -2.33221200 | -0.54607500 |
| H | -0.00192500 | -1.50173000 | -1.15536700 |
| H | -1.81682900 | -5.57706800 | -3.42305400 |
| C | 3.15259900  | -0.93673600 | 3.06641100  |
| C | 2.75443700  | 0.50327400  | 2.72831100  |

|   |             |             |            |
|---|-------------|-------------|------------|
| C | 2.84986800  | -1.20722600 | 4.54944000 |
| C | 4.66110400  | -1.08003200 | 2.81812400 |
| H | 3.00743800  | 0.75641600  | 1.69283300 |
| H | 1.68277600  | 0.68128200  | 2.86339800 |
| H | 3.29765100  | 1.19293700  | 3.38349300 |
| H | 3.21889300  | -2.18724400 | 4.86787200 |
| H | 3.33850500  | -0.45130700 | 5.17447300 |
| H | 1.77333900  | -1.18162300 | 4.74974600 |
| H | 5.21853400  | -0.39104200 | 3.46337600 |
| H | 5.01512200  | -2.09577600 | 3.02321100 |
| H | 4.89554000  | -0.83871000 | 1.77830100 |
| H | -2.73725200 | -4.27765500 | 2.31380700 |

**TSI<sub>H</sub>-1**Value of imaginary frequency = -303.1 cm<sup>-1</sup>

|   |             |             |             |
|---|-------------|-------------|-------------|
| C | -4.98926700 | -0.65514400 | 0.98905200  |
| C | -6.13355400 | 0.03674300  | 1.40723900  |
| C | -6.14255100 | 0.76614900  | 2.58990900  |
| C | -4.97613900 | 0.82823900  | 3.35489500  |
| C | -3.81448400 | 0.19469400  | 2.92257200  |
| C | -3.82477100 | -0.53830500 | 1.73722500  |
| C | -6.46086500 | -0.60551300 | -0.85575900 |
| C | -7.23366000 | -0.11363400 | 0.38093400  |
| H | -7.03583800 | 1.29935900  | 2.90259800  |
| H | -4.96056700 | 1.40195600  | 4.27629000  |
| H | -6.04043800 | 0.25299800  | -1.39095100 |
| H | -7.97264000 | -0.85508700 | 0.70851100  |
| C | -5.29113000 | -1.44784800 | -0.27033700 |
| C | -4.22575800 | -1.74900500 | -1.30764300 |
| C | -5.79138800 | -2.88746700 | 0.04001400  |
| C | -4.52044800 | -2.94840000 | -1.96861800 |
| C | -3.08875700 | -1.04070200 | -1.67368700 |
| C | -5.70557200 | -3.62101200 | -1.31163400 |
| H | -6.79416400 | -2.89087000 | 0.47688300  |
| C | -3.74359600 | -3.39148200 | -3.03245200 |
| C | -2.29655900 | -1.47333800 | -2.73545000 |
| H | -5.56307300 | -4.69954800 | -1.20211800 |
| C | -2.63735600 | -2.63386500 | -3.42424700 |
| H | -3.97946900 | -4.32313400 | -3.53877400 |
| H | -2.01482600 | -2.96741800 | -4.24867400 |
| H | -7.76816400 | 0.82363500  | 0.20406800  |
| H | -7.07414100 | -1.18082600 | -1.55520200 |
| H | -5.10278200 | -3.35158300 | 0.75449400  |
| H | -6.61707100 | -3.46976400 | -1.90275200 |
| O | -2.69932300 | 0.07623600  | -0.95076100 |
| O | -2.64868100 | -1.12305400 | 1.29278800  |
| P | -1.69996900 | -0.20792400 | 0.32158300  |
| O | -1.43267900 | 1.14050900  | 0.92095600  |
| O | -0.56074800 | -1.09847500 | -0.07861100 |
| H | -0.18094600 | 2.45298100  | 0.83599500  |
| C | 3.55553400  | -2.33029000 | 3.50105700  |
| C | 4.27997900  | -1.19649800 | 3.16266800  |
| C | 3.68424300  | -0.16773300 | 2.41905300  |
| C | 2.32613700  | -0.30594100 | 2.03920500  |
| C | 1.60858500  | -1.47206500 | 2.37035200  |
| C | 2.21963100  | -2.47754100 | 3.09736500  |
| H | 5.47448400  | 1.08021300  | 2.30564600  |

|   |             |             |             |
|---|-------------|-------------|-------------|
| H | 4.03171900  | -3.11691600 | 4.07875700  |
| H | 5.31371800  | -1.09085400 | 3.47910600  |
| C | 4.41535700  | 1.03885300  | 2.07018500  |
| C | 1.68342100  | 0.75255600  | 1.30740000  |
| H | 0.57947400  | -1.56639300 | 2.03274500  |
| H | 1.66811100  | -3.37400100 | 3.35937400  |
| C | 2.35740000  | 2.03781600  | 1.24208000  |
| C | 3.78561200  | 2.09133300  | 1.51306200  |
| H | 0.59813100  | 0.72512100  | 1.27192300  |
| N | 1.77627400  | 3.17551500  | 0.95030800  |
| N | 0.47812300  | 3.25306100  | 0.78247800  |
| C | -0.03206400 | 4.47039000  | 0.32098100  |
| O | 0.60360300  | 5.48022400  | 0.16271100  |
| O | -1.33041900 | 4.30670300  | 0.08026100  |
| C | -2.00078000 | 5.47209000  | -0.41461300 |
| H | -1.55117900 | 5.79710100  | -1.35518900 |
| H | -3.03505300 | 5.17106700  | -0.56988300 |
| H | -1.94350100 | 6.28058400  | 0.31697700  |
| C | 5.77950000  | -0.57702000 | -1.47927900 |
| C | 5.11063900  | -1.58869400 | -0.76558400 |
| C | 3.75363600  | -1.41781800 | -0.46163000 |
| C | 3.12031600  | -0.26716000 | -0.91364100 |
| C | 3.77351600  | 0.70871600  | -1.68116100 |
| C | 5.12981800  | 0.55980000  | -1.94970900 |
| H | 6.83634700  | -0.69797600 | -1.69790400 |
| H | 3.19474000  | -2.16580600 | 0.09010300  |
| H | 5.66793700  | 1.30259100  | -2.53063800 |
| C | 1.54266900  | 1.24400400  | -1.54531100 |
| C | 0.33595800  | 1.86747600  | -1.84448800 |
| C | 0.38124700  | 2.97457200  | -2.68769800 |
| C | 1.59468300  | 3.44405700  | -3.20844800 |
| C | 2.79274700  | 2.79758600  | -2.92357800 |
| C | 2.76136300  | 1.67766600  | -2.09289200 |
| H | -0.60784900 | 1.53578800  | -1.42498200 |
| H | -0.54432400 | 3.48248600  | -2.94035600 |
| H | 1.59593300  | 4.31640500  | -3.85387900 |
| H | 3.72913900  | 3.14697000  | -3.34701600 |
| N | 1.77830300  | 0.13623500  | -0.68395300 |
| H | 0.99951500  | -0.54660300 | -0.56559300 |
| C | 5.88519500  | -2.84619800 | -0.35754600 |
| C | 4.98763300  | -3.87705000 | 0.33170000  |
| C | 6.49254600  | -3.50150500 | -1.60972100 |
| C | 7.01292900  | -2.45146000 | 0.60866900  |
| H | 4.55521100  | -3.48215300 | 1.25639600  |

|   |             |             |             |
|---|-------------|-------------|-------------|
| H | 4.16971800  | -4.20054500 | -0.32085800 |
| H | 5.58036200  | -4.76022800 | 0.58956300  |
| H | 7.19525900  | -2.83633700 | -2.11957800 |
| H | 7.03621500  | -4.40936700 | -1.32724400 |
| H | 5.70883800  | -3.78036900 | -2.32173400 |
| H | 7.58295400  | -3.33891400 | 0.90453100  |
| H | 7.70726600  | -1.74158100 | 0.14874900  |
| H | 6.60207800  | -1.99002000 | 1.51294700  |
| H | -2.88435300 | 0.27702000  | 3.47500400  |
| H | -1.40718300 | -0.90495600 | -2.98788700 |
| H | 4.29744600  | 3.02270700  | 1.29328100  |

**TSII<sub>H</sub>-1**Value of imaginary frequency = -250.7 cm<sup>-1</sup>

|   |             |             |             |
|---|-------------|-------------|-------------|
| C | 4.50974600  | -0.71051200 | -1.05162600 |
| C | 5.54938200  | 0.10421100  | -1.51899800 |
| C | 5.52963000  | 0.63050300  | -2.80486600 |
| C | 4.43642400  | 0.35884000  | -3.63005400 |
| C | 3.36899900  | -0.40074200 | -3.15958900 |
| C | 3.40771700  | -0.92590100 | -1.86925300 |
| C | 5.79166500  | -0.10411400 | 0.83394800  |
| C | 6.57006800  | 0.31889400  | -0.42454600 |
| H | 6.34156800  | 1.26139500  | -3.15519700 |
| H | 4.39800000  | 0.76768000  | -4.63496800 |
| H | 5.18746800  | 0.73710700  | 1.19153900  |
| H | 7.44894300  | -0.31869600 | -0.58048700 |
| C | 4.83578100  | -1.22711200 | 0.33748400  |
| C | 3.75580700  | -1.54346900 | 1.35468400  |
| C | 5.59605700  | -2.58395500 | 0.30782100  |
| C | 4.19757300  | -2.54278200 | 2.23051500  |
| C | 2.49154500  | -0.99938400 | 1.53849200  |
| C | 5.52572500  | -3.09214800 | 1.76007200  |
| H | 6.61706900  | -2.47811900 | -0.06978900 |
| C | 3.43071400  | -2.93040200 | 3.32292000  |
| C | 1.70885000  | -1.37599700 | 2.62870300  |
| H | 5.57297600  | -4.18217700 | 1.83213500  |
| C | 2.18926500  | -2.32429200 | 3.52809900  |
| H | 3.78277100  | -3.70574200 | 3.99733800  |
| H | 1.57537800  | -2.61659600 | 4.37429500  |
| H | 6.92159800  | 1.35325600  | -0.38065500 |
| H | 6.43358100  | -0.43910000 | 1.65366300  |
| H | 5.05588000  | -3.27428800 | -0.34941400 |
| H | 6.34943500  | -2.68959500 | 2.36219500  |
| O | 1.97735400  | -0.10768200 | 0.60949400  |
| O | 2.31613300  | -1.63855400 | -1.39465900 |
| P | 1.14802300  | -0.77145000 | -0.64568100 |
| O | 0.71334500  | 0.39607300  | -1.48087400 |
| O | 0.14149400  | -1.77156400 | -0.15866700 |
| H | -0.60199100 | 1.51396800  | -1.68990100 |
| C | -4.44553400 | -3.80498800 | -2.72814400 |
| C | -5.17416800 | -2.66864100 | -2.41351400 |
| C | -4.52064700 | -1.50046700 | -1.99305100 |
| C | -3.10594900 | -1.51339300 | -1.90039000 |
| C | -2.37808900 | -2.68089600 | -2.20819100 |
| C | -3.04411800 | -3.81668100 | -2.62727800 |
| H | -6.33622700 | -0.32611300 | -1.68284900 |

|   |             |             |             |
|---|-------------|-------------|-------------|
| H | -4.96598900 | -4.70076800 | -3.05327000 |
| H | -6.25760600 | -2.67157600 | -2.48866100 |
| C | -5.25133400 | -0.28826000 | -1.66905300 |
| C | -2.42492900 | -0.34083300 | -1.44067700 |
| H | -1.29759300 | -2.66838900 | -2.08871900 |
| H | -2.49013800 | -4.71640100 | -2.87248900 |
| C | -3.14784900 | 0.91227600  | -1.44258800 |
| C | -4.60156900 | 0.86580300  | -1.41442500 |
| H | -1.34232100 | -0.32886000 | -1.53234700 |
| N | -2.60771700 | 2.10371800  | -1.54797500 |
| N | -1.31978800 | 2.26909200  | -1.71715900 |
| C | -0.88392000 | 3.57103100  | -1.99413400 |
| O | -1.57625100 | 4.55653400  | -1.97737700 |
| O | 0.41214900  | 3.52145500  | -2.28611400 |
| C | 1.02199400  | 4.79150600  | -2.54591400 |
| H | 0.91825600  | 5.44729900  | -1.67854700 |
| H | 2.07156100  | 4.57674100  | -2.73758500 |
| H | 0.56174500  | 5.26018300  | -3.41821200 |
| C | -5.91909700 | -2.02010700 | 2.14865400  |
| C | -5.20225000 | -2.91996800 | 1.35678400  |
| C | -3.95177800 | -2.58747100 | 0.83199300  |
| C | -3.45581800 | -1.32402600 | 1.12240100  |
| C | -4.14816900 | -0.42132400 | 1.95361700  |
| C | -5.39346900 | -0.76641000 | 2.46497100  |
| H | -6.89006800 | -2.30832800 | 2.53851600  |
| H | -3.39105800 | -3.29264900 | 0.22739300  |
| H | -5.94021500 | -0.08074500 | 3.10504000  |
| C | -2.12048700 | 0.49419800  | 1.37020700  |
| C | -1.03826700 | 1.35825300  | 1.36783800  |
| C | -1.09236400 | 2.50629500  | 2.17321900  |
| C | -2.26334100 | 2.76675900  | 2.90182200  |
| C | -3.35795500 | 1.90268500  | 2.88171100  |
| C | -3.28136200 | 0.74154600  | 2.12264000  |
| H | -0.16000800 | 1.14905100  | 0.76451300  |
| H | -2.32525700 | 3.65809200  | 3.51511700  |
| H | -4.24237100 | 2.12586500  | 3.47063500  |
| N | -2.26133100 | -0.72353700 | 0.65562300  |
| H | -1.40132200 | -1.28759000 | 0.49099200  |
| H | 2.48784900  | -0.57768100 | -3.76720900 |
| H | 0.72259600  | -0.93531600 | 2.74030800  |
| H | -5.62112700 | -3.89818700 | 1.14265300  |
| C | 0.14899500  | 3.39919700  | 2.25973700  |
| C | 1.29906900  | 2.57904700  | 2.87019400  |
| C | 0.55733300  | 3.85568400  | 0.85115700  |

|   |             |            |             |
|---|-------------|------------|-------------|
| C | -0.08702000 | 4.63803600 | 3.12715800  |
| H | 1.02850900  | 2.20410700 | 3.86320600  |
| H | 1.55635000  | 1.72427500 | 2.23607500  |
| H | 2.19227100  | 3.20564300 | 2.97179000  |
| H | -0.24736100 | 4.43649200 | 0.38545100  |
| H | 1.44885900  | 4.49031700 | 0.90788700  |
| H | 0.79846700  | 3.00498600 | 0.20555900  |
| H | 0.82231000  | 5.24678000 | 3.14300500  |
| H | -0.89931700 | 5.25853600 | 2.73409000  |
| H | -0.32606400 | 4.36976200 | 4.16133900  |
| H | -5.12682500 | 1.79918300 | -1.24035200 |



**(R)-C10**

|   |             |             |             |
|---|-------------|-------------|-------------|
| H | -1.35131500 | -2.42282900 | 0.90342200  |
| C | 1.29646900  | 5.39481200  | -2.14936800 |
| C | 0.54088200  | 4.04546500  | -2.13200400 |
| C | 1.32048600  | 2.92230500  | -1.49170600 |
| C | 2.65171900  | 2.78040900  | -1.91799800 |
| C | 3.20147000  | 3.85207900  | -2.82316200 |
| C | 2.82456300  | 5.22800300  | -2.25797900 |
| H | 0.92047200  | 5.97569100  | -2.99686400 |
| H | -0.44957900 | 4.15771100  | -1.68737600 |
| C | 0.76726400  | 1.97258700  | -0.61760200 |
| C | 3.41893800  | 1.70382500  | -1.48622600 |
| H | 4.28585700  | 3.74734400  | -2.91849000 |
| H | 3.25079500  | 6.02212300  | -2.87761200 |
| C | 2.87904200  | 0.71080500  | -0.66474100 |
| C | 1.55336000  | 0.86760700  | -0.26621800 |
| H | 4.45395500  | 1.61520700  | -1.80683000 |
| C | -0.62652900 | 2.05199600  | -0.08680800 |
| C | -1.07446300 | 3.12317800  | 0.71337200  |
| C | -1.48913300 | 0.98102000  | -0.32532800 |
| C | -2.40135700 | 3.12249400  | 1.17395600  |
| C | -0.11815900 | 4.22853500  | 1.11719000  |
| C | -2.80485100 | 0.94927900  | 0.13407800  |
| C | -2.95071800 | 4.23316900  | 2.04973100  |
| C | -3.24182100 | 2.05004900  | 0.86706900  |
| C | -0.60169300 | 5.01469100  | 2.33391100  |
| H | 0.87234300  | 3.79860900  | 1.29992900  |
| C | -2.04428800 | 5.45906200  | 2.11582300  |
| H | -3.94994900 | 4.50582100  | 1.69341300  |
| H | -4.26532700 | 2.05835000  | 1.23657400  |
| H | -0.54556700 | 4.38777800  | 3.23317900  |
| H | -2.10791400 | 6.02358100  | 1.17661100  |
| O | -1.00083700 | -0.11678300 | -1.03543600 |
| O | 0.97806600  | -0.13403900 | 0.52127300  |
| P | -0.03883300 | -1.12916800 | -0.23007600 |
| O | -0.83809900 | -1.61098800 | 1.05495100  |
| O | 0.50692300  | -2.16005300 | -1.12074900 |
| C | -3.69075100 | -0.21679700 | -0.14374200 |
| C | -4.07345900 | -0.48277100 | -1.42010700 |
| C | -4.14481900 | -1.07094900 | 0.93956500  |
| C | -4.93959600 | -1.57987900 | -1.74366900 |
| H | -3.72548200 | 0.15060100  | -2.23258600 |
| C | -5.00585800 | -2.16594000 | 0.65872600  |
| C | -3.71979800 | -0.85411500 | 2.27116400  |

|   |             |             |             |
|---|-------------|-------------|-------------|
| C | -5.31873600 | -1.81436700 | -3.08406300 |
| C | -5.41903000 | -2.42594800 | -0.71501000 |
| C | -5.42644200 | -2.98276300 | 1.73261400  |
| H | -3.03880100 | -0.03638600 | 2.48028900  |
| C | -4.14249100 | -1.67131900 | 3.29665700  |
| C | -6.15096800 | -2.86268300 | -3.40739700 |
| H | -4.93717500 | -1.15034600 | -3.85492300 |
| C | -6.27064900 | -3.49447500 | -1.07500000 |
| C | -5.00961000 | -2.74236600 | 3.02435800  |
| H | -6.08778000 | -3.82117000 | 1.54632200  |
| H | -3.80200700 | -1.48962000 | 4.31112100  |
| C | -6.62869300 | -3.70829400 | -2.38999100 |
| H | -6.43617700 | -3.03869000 | -4.43976800 |
| H | -6.65557000 | -4.16647800 | -0.31664700 |
| H | -5.34700700 | -3.38744600 | 3.82954300  |
| H | -7.28234900 | -4.53805400 | -2.64002600 |
| C | 3.67184200  | -0.49228600 | -0.28888200 |
| C | 4.12924500  | -1.30723700 | -1.27611100 |
| C | 3.97751900  | -0.79649600 | 1.09797900  |
| C | 4.88739400  | -2.49286900 | -0.99711100 |
| H | 3.89705500  | -1.08109900 | -2.31392700 |
| C | 4.72510100  | -1.96193500 | 1.41305600  |
| C | 3.56434700  | 0.05875900  | 2.14441100  |
| C | 5.32381600  | -3.32267700 | -2.05330500 |
| C | 5.18267600  | -2.83995800 | 0.34269600  |
| C | 5.01245100  | -2.22970400 | 2.77026100  |
| H | 3.00882200  | 0.95931800  | 1.90300600  |
| C | 3.86079400  | -0.22666700 | 3.45901000  |
| C | 6.03719200  | -4.47249200 | -1.79670900 |
| H | 5.08048300  | -3.03716300 | -3.07319300 |
| C | 5.91297900  | -4.02593500 | 0.57793400  |
| C | 4.58918200  | -1.38562100 | 3.77432200  |
| H | 5.58249700  | -3.11186800 | 3.03753700  |
| H | 3.53383800  | 0.44345300  | 4.24778000  |
| C | 6.33129500  | -4.82418500 | -0.46704000 |
| H | 6.36785000  | -5.10643600 | -2.61335300 |
| H | 6.15340600  | -4.32819500 | 1.59082800  |
| H | 4.82483100  | -1.61582200 | 4.80861300  |
| H | 6.88974100  | -5.73144300 | -0.25859100 |
| H | 1.05714900  | 5.96884400  | -1.24945000 |
| H | 3.27940700  | 5.31840500  | -1.26564600 |
| H | 2.77443500  | 3.74440900  | -3.83003500 |
| H | 0.37413400  | 3.74106100  | -3.17412500 |
| H | 0.00265400  | 4.93007200  | 0.28316200  |

|   |             |            |            |
|---|-------------|------------|------------|
| H | 0.05632900  | 5.87377100 | 2.49550600 |
| H | -2.38049200 | 6.12428100 | 2.91674100 |
| H | -3.08617300 | 3.83264200 | 3.06307000 |

**TSI'<sub>(R)</sub>-C10-1**Value of imaginary frequency = -333.7 cm<sup>-1</sup>

|   |             |             |             |
|---|-------------|-------------|-------------|
| C | 7.41575800  | -2.27542800 | -0.94656200 |
| C | 6.28820900  | -1.24607300 | -1.17264900 |
| C | 4.91345900  | -1.84769000 | -1.01602400 |
| C | 4.69376600  | -3.04432200 | -1.71963100 |
| C | 5.86689300  | -3.62743900 | -2.46368300 |
| C | 7.09613300  | -3.66553500 | -1.54357300 |
| H | 8.33402100  | -1.87294400 | -1.38474600 |
| H | 6.42596300  | -0.37665400 | -0.52683200 |
| C | 3.86557700  | -1.25956800 | -0.28856700 |
| C | 3.44427000  | -3.65591500 | -1.69156800 |
| H | 5.62499300  | -4.62893400 | -2.83085100 |
| H | 7.95893100  | -4.05489900 | -2.09150800 |
| C | 2.37350900  | -3.07001900 | -1.01493200 |
| C | 2.60183200  | -1.87042600 | -0.34098800 |
| H | 3.28966500  | -4.59619800 | -2.21553600 |
| C | 4.00712800  | 0.00015900  | 0.50435700  |
| C | 4.92549100  | 0.15670900  | 1.55465300  |
| C | 3.13302000  | 1.06386300  | 0.22055200  |
| C | 4.98310400  | 1.37242000  | 2.25769700  |
| C | 5.84487000  | -0.92648400 | 2.06169000  |
| C | 3.19690900  | 2.28796200  | 0.88899800  |
| C | 6.00036800  | 1.47672900  | 3.36395300  |
| C | 4.14269200  | 2.42347200  | 1.90869300  |
| C | 7.29248000  | -0.42522300 | 2.24411400  |
| H | 5.46526100  | -1.24283000 | 3.04275100  |
| C | 7.36882800  | 0.99117100  | 2.86181400  |
| H | 6.06372300  | 2.50617600  | 3.72791200  |
| H | 4.21142600  | 3.36899400  | 2.44205600  |
| H | 7.82575200  | -1.14632200 | 2.87092800  |
| H | 7.72123300  | 1.70281600  | 2.10845600  |
| O | 2.19021700  | 0.88354000  | -0.77384100 |
| O | 1.55218400  | -1.28208800 | 0.33372000  |
| P | 0.84983400  | 0.04418200  | -0.35341800 |
| O | 0.12136300  | 0.68488300  | 0.79669100  |
| O | 0.12754900  | -0.30920000 | -1.61522600 |
| H | -0.88814800 | 1.80482100  | 0.34808900  |
| C | -2.74161700 | -1.51556500 | 0.00195700  |
| C | -4.12637200 | -1.56936100 | 0.25497200  |
| C | -4.59375700 | -2.28371200 | 1.35870100  |
| C | -3.65953400 | -2.90188900 | 2.18786900  |
| C | -2.28325800 | -2.80826600 | 1.93344000  |
| C | -1.79751800 | -2.11559100 | 0.82762400  |

|   |             |             |             |
|---|-------------|-------------|-------------|
| C | -3.72950500 | -0.36506000 | -1.65666100 |
| C | -4.75412400 | -0.71931300 | -0.74014400 |
| H | -5.65732700 | -2.34658400 | 1.57172500  |
| H | -4.00263400 | -3.46366400 | 3.05148400  |
| H | -1.58002400 | -3.30273700 | 2.59674200  |
| H | -0.73497800 | -2.07012500 | 0.61044000  |
| H | -1.60224000 | -0.56160400 | -1.52419200 |
| N | -2.55339100 | -0.77103100 | -1.16138700 |
| C | -3.84773600 | 0.32146800  | -2.99747400 |
| C | -2.46871900 | 0.72906100  | -3.52402000 |
| C | -4.75593600 | 1.55559100  | -2.90790200 |
| C | -4.47778100 | -0.69160100 | -3.97261900 |
| H | -1.82562900 | -0.14088400 | -3.69353600 |
| H | -1.94971800 | 1.39317500  | -2.82697700 |
| H | -2.58522600 | 1.25246600  | -4.47742500 |
| H | -4.89707000 | 1.96509400  | -3.91313200 |
| H | -4.30759200 | 2.32853700  | -2.27827300 |
| H | -5.74406100 | 1.29616800  | -2.51235100 |
| H | -4.59040100 | -0.22515900 | -4.95681900 |
| H | -5.46491500 | -1.01421200 | -3.62759200 |
| H | -3.84152800 | -1.57450800 | -4.07911700 |
| C | -7.17192500 | -0.21112600 | 3.75584800  |
| C | -5.80098900 | -0.08720900 | 3.90465400  |
| C | -5.00440500 | 0.36574300  | 2.83966700  |
| C | -5.62971200 | 0.70305400  | 1.61484200  |
| C | -7.02408600 | 0.57117800  | 1.47973400  |
| C | -7.78961600 | 0.11900100  | 2.53843900  |
| H | -3.11672400 | 0.18278900  | 3.91788700  |
| H | -7.77468500 | -0.56682700 | 4.58556900  |
| H | -5.32391500 | -0.34508900 | 4.84590700  |
| C | -3.56502700 | 0.50149900  | 2.98119800  |
| C | -4.81387600 | 1.15493200  | 0.51432600  |
| H | -7.48801400 | 0.82897500  | 0.53106900  |
| H | -8.86467200 | 0.02008500  | 2.43136200  |
| C | -3.42946000 | 1.47305500  | 0.76875900  |
| C | -2.79855900 | 1.01377600  | 1.99616600  |
| H | -5.29554100 | 1.68646600  | -0.29877500 |
| H | -1.72461400 | 1.11230600  | 2.11553900  |
| N | -2.87017500 | 2.17468300  | -0.19479800 |
| N | -1.58433400 | 2.42104700  | -0.17650100 |
| C | -1.03267400 | 3.07930100  | -1.28276100 |
| O | 0.10396400  | 2.87756900  | -1.63231400 |
| O | -1.88685400 | 3.92185400  | -1.85840700 |
| C | -1.38465900 | 4.53836600  | -3.05200600 |

|   |             |             |             |
|---|-------------|-------------|-------------|
| H | -0.39214300 | 4.95810900  | -2.87773100 |
| H | -2.09720600 | 5.32315400  | -3.30102300 |
| H | -1.33495600 | 3.80110500  | -3.85779900 |
| H | -5.80940800 | -0.69513400 | -0.98036000 |
| H | 6.09243500  | -3.00749800 | -3.34237100 |
| H | 6.88738400  | -4.37439700 | -0.73578500 |
| H | 7.60286200  | -2.37667700 | 0.12703100  |
| H | 6.36288100  | -0.87804900 | -2.20486800 |
| H | 7.79728300  | -0.42453100 | 1.27302300  |
| H | 8.09246700  | 1.01395600  | 3.68160400  |
| H | 5.68604000  | 0.85361600  | 4.21250900  |
| H | 5.82169700  | -1.81181300 | 1.42333700  |
| C | 1.02674100  | -3.71154000 | -0.97166500 |
| C | 0.09971400  | -3.43391500 | -1.92375300 |
| C | 0.70385100  | -4.62597400 | 0.10774300  |
| C | -1.21771600 | -4.00486600 | -1.88794300 |
| H | 0.33218700  | -2.72539600 | -2.71330400 |
| C | -0.58096700 | -5.22818400 | 0.16428800  |
| C | 1.64864800  | -4.91913000 | 1.11809200  |
| C | -2.17331500 | -3.64831500 | -2.86544800 |
| C | -1.57555700 | -4.89420400 | -0.84635100 |
| C | -0.85947500 | -6.11757700 | 1.22639200  |
| H | 2.62656000  | -4.45037700 | 1.07434400  |
| C | 1.34550600  | -5.78372000 | 2.14740000  |
| C | -3.45836200 | -4.14275500 | -2.81010200 |
| H | -1.87395800 | -2.96726600 | -3.65900200 |
| C | -2.90113300 | -5.38089800 | -0.80858400 |
| C | 0.07998000  | -6.39210200 | 2.19812400  |
| H | -1.82897000 | -6.59881900 | 1.28863200  |
| H | 2.08285500  | -5.99521000 | 2.91527000  |
| C | -3.82284200 | -5.01325500 | -1.76717500 |
| H | -4.18864200 | -3.86143800 | -3.56259200 |
| H | -3.21611300 | -6.04377500 | -0.01082500 |
| H | -0.16108800 | -7.07871200 | 3.00354100  |
| H | -4.83704400 | -5.39635300 | -1.71258200 |
| C | 2.33250700  | 3.44138600  | 0.49454000  |
| C | 2.66708400  | 4.16992100  | -0.60093100 |
| C | 1.16586800  | 3.80995300  | 1.27300400  |
| C | 1.90043100  | 5.30539000  | -1.02724300 |
| H | 3.53816800  | 3.89305400  | -1.18982600 |
| C | 0.37158000  | 4.91960500  | 0.87590200  |
| C | 0.78855100  | 3.06776800  | 2.41518400  |
| C | 2.28256300  | 6.03304200  | -2.17586300 |
| C | 0.75159900  | 5.69590000  | -0.29770400 |

|   |             |            |             |
|---|-------------|------------|-------------|
| C | -0.78618300 | 5.22263200 | 1.62844500  |
| H | 1.38820300  | 2.21105900 | 2.70132600  |
| C | -0.33869800 | 3.39466300 | 3.13743900  |
| C | 1.55425700  | 7.12532500 | -2.59628300 |
| H | 3.16519700  | 5.71322900 | -2.72330800 |
| C | 0.02354300  | 6.82039900 | -0.74866900 |
| C | -1.13826600 | 4.47801700 | 2.73400500  |
| H | -1.42070200 | 6.05151400 | 1.33652600  |
| H | -0.61600900 | 2.80786600 | 4.00800600  |
| C | 0.41598400  | 7.52163900 | -1.87122100 |
| H | 1.85645000  | 7.67846900 | -3.48002100 |
| H | -0.85876000 | 7.15165500 | -0.21283900 |
| H | -2.03494300 | 4.72953800 | 3.29205600  |
| H | -0.15969200 | 8.38295500 | -2.19559300 |

**TSII<sub>(R)</sub>-C10-1**Value of imaginary frequency = -317.2 cm<sup>-1</sup>

|   |             |             |             |
|---|-------------|-------------|-------------|
| C | -7.78228300 | -0.22957000 | -0.27404700 |
| C | -6.39847900 | -0.77865100 | -0.68095400 |
| C | -5.31126000 | 0.26444100  | -0.59570100 |
| C | -5.60710000 | 1.48887800  | -1.21828700 |
| C | -6.98484100 | 1.65076300  | -1.80553500 |
| C | -8.03851600 | 1.20817100  | -0.78086100 |
| H | -8.54378800 | -0.91347900 | -0.66120200 |
| H | -6.15362700 | -1.67104200 | -0.10264800 |
| C | -4.04915100 | 0.05958300  | -0.01522400 |
| C | -4.64814900 | 2.49089900  | -1.26853100 |
| H | -7.14919100 | 2.68845300  | -2.11024800 |
| H | -9.03874300 | 1.28938900  | -1.21608800 |
| C | -3.36349100 | 2.29469000  | -0.75346600 |
| C | -3.08028400 | 1.07457200  | -0.13606200 |
| H | -4.88296900 | 3.43987500  | -1.74599400 |
| C | -3.66998300 | -1.21651100 | 0.66406400  |
| C | -4.36975400 | -1.75479900 | 1.75682300  |
| C | -2.53619100 | -1.90110400 | 0.19438700  |
| C | -3.95478600 | -2.97309300 | 2.31981300  |
| C | -5.53040900 | -1.08526800 | 2.45036200  |
| C | -2.14232300 | -3.13699200 | 0.71062300  |
| C | -4.74021800 | -3.49205900 | 3.49584600  |
| C | -2.87565500 | -3.66056600 | 1.77793600  |
| C | -6.70226500 | -2.05701500 | 2.70095900  |
| H | -5.16724500 | -0.72654600 | 3.42305400  |
| C | -6.24317000 | -3.45368000 | 3.18243600  |
| H | -4.42274300 | -4.50791100 | 3.74828700  |
| H | -2.58062400 | -4.61963900 | 2.19864400  |
| H | -7.37318000 | -1.59951100 | 3.43446000  |
| H | -6.44218200 | -4.19551800 | 2.40247300  |
| O | -1.78560200 | -1.31279200 | -0.80969000 |
| O | -1.83790500 | 0.87765600  | 0.43059700  |
| P | -0.75778500 | -0.14709000 | -0.28344700 |
| O | 0.09773400  | -0.65674800 | 0.84273200  |
| O | -0.11810900 | 0.49927700  | -1.47325800 |
| H | 1.46630400  | -1.45172800 | 0.26344400  |
| C | 3.25667700  | 0.94247200  | -1.79799700 |
| C | 4.56890800  | 1.30498200  | -1.45163600 |
| C | 5.62363300  | 0.88979400  | -2.27270200 |
| C | 5.32344700  | 0.16533600  | -3.41975100 |
| C | 3.99807700  | -0.17265400 | -3.74661300 |
| C | 2.93568000  | 0.20149300  | -2.93227200 |



|   |            |             |             |
|---|------------|-------------|-------------|
| C | 3.09079000 | 2.15862100  | 0.08433400  |
| C | 4.48580600 | 1.96771500  | -0.16505400 |
| H | 6.65211800 | 1.13892200  | -2.02678500 |
| H | 6.12673300 | -0.14544100 | -4.08020600 |
| H | 3.80281900 | -0.73603700 | -4.65379200 |
| H | 1.90389800 | -0.06486700 | -3.14526600 |
| H | 1.37720800 | 1.33446900  | -0.90209300 |
| N | 2.40063400 | 1.46936900  | -0.83195500 |
| C | 2.40499000 | 3.14521600  | 0.99635500  |
| C | 0.94250400 | 2.75024700  | 1.22933900  |
| C | 2.45801100 | 4.48202700  | 0.22319000  |
| C | 3.12675700 | 3.32707900  | 2.33325500  |
| H | 0.86417200 | 1.74505800  | 1.65756400  |
| H | 0.36060600 | 2.77402500  | 0.30056100  |
| H | 0.48108700 | 3.46244100  | 1.92069000  |
| H | 1.87974900 | 5.23417000  | 0.77090400  |
| H | 2.02821500 | 4.37183200  | -0.77538800 |
| H | 3.48831500 | 4.83961800  | 0.12506300  |
| H | 2.77961800 | 4.25640200  | 2.79560100  |
| H | 4.21346800 | 3.39573400  | 2.21166600  |
| H | 2.90290500 | 2.50901500  | 3.01801100  |
| C | 6.39567100 | 1.68531600  | 4.72627900  |
| C | 5.12867200 | 1.13049600  | 4.65803700  |
| C | 4.64109900 | 0.61821100  | 3.44500400  |
| C | 5.46198300 | 0.67797500  | 2.29622600  |
| C | 6.74963600 | 1.23724000  | 2.38298700  |
| C | 7.21298600 | 1.73743600  | 3.58594900  |
| H | 2.67688900 | 0.08245900  | 4.22374900  |
| H | 6.76109100 | 2.08215000  | 5.66818000  |
| H | 4.49599500 | 1.09265900  | 5.54032800  |
| C | 3.30872700 | 0.05676600  | 3.33970800  |
| C | 4.96025000 | 0.15632800  | 1.04483900  |
| H | 7.37037600 | 1.27145800  | 1.49110300  |
| H | 8.20626200 | 2.16911100  | 3.65134400  |
| C | 3.73287500 | -0.59362600 | 1.04356000  |
| C | 2.84841400 | -0.49003600 | 2.19250600  |
| H | 5.68349200 | -0.09534500 | 0.27641400  |
| H | 1.84834800 | -0.90402200 | 2.14494400  |
| N | 3.50765300 | -1.28580600 | -0.05766800 |
| N | 2.31665300 | -1.81223300 | -0.23554500 |
| C | 2.01970200 | -2.42738000 | -1.45585800 |
| O | 0.89530400 | -2.42111500 | -1.89574800 |
| O | 3.07367500 | -3.01178700 | -2.01499600 |
| C | 2.81299200 | -3.54526200 | -3.31848200 |

|   |             |             |             |
|---|-------------|-------------|-------------|
| H | 1.95606000  | -4.22137800 | -3.29213800 |
| H | 3.71706900  | -4.08055800 | -3.60544100 |
| H | 2.61364900  | -2.73136100 | -4.02055100 |
| H | 5.25488900  | 2.58850200  | 0.27603400  |
| H | -7.07578800 | 1.03118700  | -2.70853300 |
| H | -8.00145700 | 1.90757200  | 0.06076700  |
| H | -7.87304300 | -0.24971000 | 0.81642700  |
| H | -6.45342900 | -1.09872200 | -1.73045800 |
| H | -7.28010200 | -2.16637000 | 1.77806900  |
| H | -6.81182700 | -3.76158700 | 4.06459700  |
| H | -4.53891100 | -2.86395600 | 4.37469500  |
| H | -5.87366900 | -0.20307600 | 1.90608500  |
| C | -2.33731400 | 3.36431900  | -0.91893600 |
| C | -1.36653900 | 3.21732300  | -1.85728500 |
| C | -2.40518300 | 4.58268300  | -0.13489500 |
| C | -0.40441700 | 4.24835600  | -2.12217600 |
| H | -1.29855600 | 2.29445500  | -2.42330700 |
| C | -1.47932800 | 5.63253600  | -0.37964600 |
| C | -3.37182000 | 4.74099300  | 0.88467100  |
| C | 0.59766900  | 4.04769200  | -3.09923000 |
| C | -0.46898600 | 5.47469900  | -1.41843700 |
| C | -1.56385000 | 6.80069800  | 0.41041100  |
| H | -4.07140900 | 3.93325900  | 1.07420900  |
| C | -3.43109800 | 5.89333800  | 1.63827500  |
| C | 1.50056600  | 5.04527300  | -3.39681000 |
| H | 0.63831700  | 3.08957900  | -3.61152900 |
| C | 0.46095200  | 6.48495900  | -1.75217100 |
| C | -2.51737600 | 6.93283300  | 1.39783500  |
| H | -0.86482900 | 7.61346500  | 0.24964200  |
| H | -4.17863900 | 5.99542500  | 2.41866900  |
| C | 1.42151300  | 6.27741400  | -2.72132500 |
| H | 2.26638000  | 4.88572800  | -4.14933400 |
| H | 0.43256300  | 7.44335900  | -1.24565500 |
| H | -2.55677000 | 7.84059100  | 1.99174600  |
| H | 2.12430400  | 7.07010500  | -2.95867600 |
| C | -1.01567200 | -3.91945000 | 0.12459200  |
| C | -1.17707100 | -4.50804600 | -1.08849900 |
| C | 0.22462800  | -4.10338100 | 0.85204400  |
| C | -0.16567800 | -5.34016200 | -1.67415200 |
| H | -2.10243400 | -4.36246800 | -1.64066700 |
| C | 1.25778800  | -4.90544800 | 0.29802700  |
| C | 0.43724300  | -3.47261500 | 2.09973000  |
| C | -0.37989100 | -5.94801500 | -2.93127500 |
| C | 1.04979400  | -5.56518200 | -0.98444000 |

|   |             |             |             |
|---|-------------|-------------|-------------|
| C | 2.47584400  | -5.01820300 | 1.00530300  |
| H | -0.34796700 | -2.84535200 | 2.50744100  |
| C | 1.62829400  | -3.61951000 | 2.77749900  |
| C | 0.57379700  | -6.77098600 | -3.49090800 |
| H | -1.31659500 | -5.75615400 | -3.44792000 |
| C | 2.00692600  | -6.42116400 | -1.57507000 |
| C | 2.66131300  | -4.39167000 | 2.21925400  |
| H | 3.29134400  | -5.59882800 | 0.58936100  |
| H | 1.77480900  | -3.12502100 | 3.73315200  |
| C | 1.77446500  | -7.01378700 | -2.79968100 |
| H | 0.39877300  | -7.23519900 | -4.45651300 |
| H | 2.94160200  | -6.62958700 | -1.06679600 |
| H | 3.60833300  | -4.49258500 | 2.74047100  |
| H | 2.52406700  | -7.67021800 | -3.23078600 |
